# Supplementary material for: Genome-wide mapping of Polycomb target genes unravels their roles in cell fate transitions
Source: HighWire-hosted journal article supplement (doi:10.1101/gad.381706), 2006-04-17
Supplement: BrackenSuppTable3.pdf [file BrackenSuppTable3.pdf]

# Bracken. Supplementary Table 3.

A complete list of all significantly enriched PcG target genes in human embryonic fibroblasts

| Gene name | Description                                                                | Gene ID   | anti-HA |         | anti-CBX8 |         | anti-SUZ12 |         | anti-K27me3 |         | Biological Process (Information extracted from DAVID <a href="http://apps1.niaid.nih.gov/david/">http://apps1.niaid.nih.gov/david/</a> ) |
|-----------|----------------------------------------------------------------------------|-----------|---------|---------|-----------|---------|------------|---------|-------------|---------|------------------------------------------------------------------------------------------------------------------------------------------|
|           |                                                                            |           | MEAN    | Std Dev | MEAN      | Std Dev | MEAN       | Std Dev | MEAN        | Std Dev |                                                                                                                                          |
| HOXD12    | homeo box D12                                                              | NM_021193 |         |         | 4.446     | 0.319   | 3.574      | 0.529   | 2.945       | 0.528   | Regulation of transcription, DNA-dependent. Development.                                                                                 |
| HOXA11    | homeobox protein A11                                                       | NM_005523 |         |         | 4.406     | 0.241   | 3.205      | 0.362   | 3.273       | 0.477   | Regulation of transcription, DNA-dependent. Morphogenesis.                                                                               |
| OLIG2     | oligodendrocyte lineage transcription factor 2                             | BC047511  |         |         | 4.117     | 0.379   | 3.189      | 0.244   | 2.999       | 0.386   | Transcription. Regulation of transcription, DNA-dependent. Development.                                                                  |
| PHOX2B    | paired-like homeobox 2b                                                    | NM_003924 |         |         | 4.685     | 0.233   | 2.869      | 0.706   | 2.721       | 0.316   | Regulation of transcription, DNA-dependent. Development. Neurogenesis.                                                                   |
| SIM1      | single-minded homolog 1                                                    | NM_005068 |         |         | 4.42      | 0.327   | 2.943      | 0.336   | 2.538       | 0.7     | Transcription. Regulation of transcription, DNA-dependent. Signal transduction. Development. Neurogenesis.                               |
| HOXA13    | homeobox protein A13                                                       | NM_000522 |         |         | 3.728     | 0.517   | 3.166      | 0.696   | 2.958       | 0.979   | Skeletal development. Regulation of transcription, DNA-dependent. Development.                                                           |
| ZIC5      | zinc finger protein of the cerebellum 5                                    | NM_033132 |         |         | 4.279     | 0.315   | 2.562      | 0.479   | 2.95        | 0.613   |                                                                                                                                          |
| LHX9      | LIM homeobox 9                                                             | NM_020204 |         |         | 4.219     | 0.227   | 2.966      | 0.549   | 2.488       | 0.594   |                                                                                                                                          |
| N/A       | Unknown (protein for MGC:15427)                                            | BC008699  |         |         | 4.286     | 0.463   | 2.298      | 0.379   | 2.934       | 0.495   |                                                                                                                                          |
| HOXD13    | homeo box D13                                                              | NM_000523 |         |         | 3.976     | 0.472   | 2.657      | 0.484   | 2.779       | 0.806   | Skeletal development. Regulation of transcription, DNA-dependent. Transcription from RNA polymerase II promoter. Development.            |
| PAX3      | paired box gene 3 isoform PAX3d                                            | NM_181458 |         |         | 4.171     | 0.497   | 2.296      | 0.523   | 2.795       | 0.31    | Regulation of transcription, DNA-dependent. Transcription from RNA polymerase II promoter. Apoptosis. Development. Neurogenesis.         |
| PRDM13    | PR domain containing 13                                                    | NM_021620 |         |         | 4.037     | 0.305   | 2.658      | 0.424   | 2.557       | 0.488   | Transcription. Regulation of transcription, DNA-dependent.                                                                               |
| OLIG3     | oligodendrocyte transcription factor 3                                     | NM_175747 |         |         | 4.127     | 0.39    | 2.328      | 0.763   | 2.592       | 0.953   |                                                                                                                                          |
| TAL1      | T-cell acute lymphocytic leukemia 1                                        | NM_003189 | 1.791   | 1.534   | 4.186     | 0.292   | 2.842      | 0.392   | 1.978       | 0.333   | Transcription. Regulation of transcription, DNA-dependent. Cell proliferation. Cell differentiation.                                     |
| NKX2-5    | * NK2 transcription factor related, locus 5"                               | NM_004387 |         |         | 3.508     | 0.478   | 2.692      | 0.303   | 2.804       | 0.565   | Negative regulation of transcription from RNA polymerase II promoter. Development. Heart development.                                    |
| HOXB9     | homeo box B9                                                               | NM_024017 |         |         | 3.711     | 0.414   | 2.664      | 0.42    | 2.625       | 0.683   | Regulation of transcription, DNA-dependent. Development.                                                                                 |
| PAX-9     | N/A                                                                        | U59628    |         |         | 3.894     | 0.437   | 2.958      | 0.354   | 2.102       | 0.587   | Transcription. Regulation of transcription, DNA-dependent. Development.                                                                  |
| TLX3      | * T-cell leukemia, homeobox 3"                                             | NM_021025 |         |         | 4.151     | 0.468   | 2.629      | 0.611   | 2.139       | 0.598   | Regulation of transcription, DNA-dependent. Development.                                                                                 |
| CYP26A1   | * cytochrome P450, family 26, subfamily A, polypeptide 1 isoform NM_057157 | NM_057157 |         |         | 3.753     | 0.492   | 2.663      | 0.571   | 2.49        | 0.671   | Electron transport. Metabolism.                                                                                                          |
| LGI3      | leucine-rich glioma inactivated protein 3                                  | AJ487518  |         |         | 3.615     | 0.555   | 2.582      | 0.658   | 2.684       | 0.556   |                                                                                                                                          |
| N/A       | N/A                                                                        | AK026075  |         |         | 4.276     | 0.349   | 2.669      | 0.436   | 1.888       | 0.681   | Regulation of cell cycle. Cytokinesis. Carbohydrate metabolism. Base-excision repair.                                                    |
| FLJ32063  | hypothetical protein FLJ32063                                              | NM_153031 |         |         | 3.836     | 0.403   | 2.266      | 0.333   | 2.715       | 0.612   |                                                                                                                                          |
| MEOX2     | mesenchyme homeo box 2                                                     | NM_005924 |         |         | 4.075     | 0.534   | 2.148      | 0.429   | 2.542       | 0.545   | Regulation of transcription, DNA-dependent. Development. Circulation.                                                                    |
| LHX1      | LIM homeobox protein 1                                                     | NM_005568 |         |         | 3.811     | 0.442   | 2.903      | 0.796   | 2.009       | 0.906   | Regulation of transcription, DNA-dependent. Neurogenesis.                                                                                |
| ZIC4      | zinc finger protein of the cerebellum 4                                    | NM_032153 |         |         | 4.079     | 0.383   | 2.701      | 0.549   | 1.928       | 0.878   |                                                                                                                                          |
| N/A       | progesterone receptor B isoform                                            | AY382152  |         |         | 3.489     | 0.694   | 2.549      | 0.771   | 2.651       | 0.57    |                                                                                                                                          |
| EVX1      | even-skipped homeo box 1                                                   | NM_001989 |         |         | 3.661     | 0.429   | 2.078      | 0.223   | 2.917       | 0.543   |                                                                                                                                          |
| SIX6      | SIX6 protein                                                               | BC065831  |         |         | 3.46      | 0.452   | 2.413      | 0.437   | 2.765       | 0.473   | Regulation of transcription, DNA-dependent. Development. Visual perception. Organogenesis.                                               |
| CROCC4    | transcriptional activator of the c-fos promoter                            | NM_006365 |         |         | 3.3       | 0.478   | 2.169      | 0.694   | 3.154       | 0.78    |                                                                                                                                          |
| VGLL2     | vestigial-like 2 isoform 1                                                 | NM_182645 |         |         | 3.986     | 0.503   | 2.279      | 0.619   | 2.342       | 0.709   | Regulation of transcription.                                                                                                             |
| BARX1     | BARX1 protein                                                              | BC064363  |         |         | 2.831     | 1.001   | 2.992      | 0.765   | 2.767       | 0.89    | Regulation of transcription, DNA-dependent. Regulation of transcription, DNA-dependent. Development.                                     |
| TLX2      | * T-cell leukemia, homeobox 2 isoform 1"                                   | NM_016170 |         |         | 4.067     | 0.366   | 2.262      | 0.438   | 2.24        | 0.61    | Regulation of transcription, DNA-dependent. Development.                                                                                 |
| N/A       | N/A                                                                        | AK021601  |         |         | 4.357     | 0.32    | 1.46       | 0.537   | 2.713       | 0.386   |                                                                                                                                          |
| FLJ20171  | FLJ20171 protein                                                           | BC067098  |         |         | 3.331     | 0.396   | 2.536      | 0.276   | 2.616       | 0.35    |                                                                                                                                          |
| WT1       | WT1 protein                                                                | BC046461  |         |         | 3.819     | 0.629   | 2.266      | 0.576   | 2.365       | 0.745   | Transcription. Regulation of transcription, DNA-dependent. Regulation of transcription, DNA-dependent. Cell cycle.                       |
| KCNA1     | * potassium voltage-gated channel, shaker-related subfamily, member 1      | NM_000217 |         |         | 3.287     | 0.54    | 2.432      | 0.607   | 2.685       | 0.678   | Cation transport. Potassium ion transport. Muscle contraction. Synaptic transmission.                                                    |
| PAX5      | paired box 5                                                               | NM_016734 |         |         | 4.161     | 0.515   | 2.602      | 0.692   | 1.637       | 0.757   | Transcription. Regulation of transcription, DNA-dependent. Transcription from RNA polymerase II promoter. Humoral immune response.       |
| GJB6      | * gap junction protein, beta 6 (connexin 30)"                              | NM_006783 |         |         | 3.07      | 0.59    | 2.551      | 0.835   | 2.751       | 0.798   | Cell communication. Perception of sound.                                                                                                 |
| FOXB1     | forkhead box B1                                                            | NM_012182 |         |         | 3.445     | 0.572   | 2.555      | 0.362   | 2.323       | 0.562   | Transcription. Regulation of transcription, DNA-dependent.                                                                               |
| N/A       | Unknown (protein for MGC:70702)                                            | BC059780  |         |         | 2.688     | 0.434   | 2.38       | 0.312   | 3.225       | 0.449   |                                                                                                                                          |
| HOXD9     | homeo box D9                                                               | NM_014213 |         |         | 3.422     | 0.361   | 2.416      | 0.349   | 2.45        | 0.506   | Regulation of transcription, DNA-dependent. Development.                                                                                 |
| NR2E1     | * nuclear receptor subfamily 2, group E, member 1"                         | NM_003269 |         |         | 3.413     | 0.65    | 2.545      | 0.453   | 2.317       | 0.577   | Transcription. Regulation of transcription, DNA-dependent. Development. Neurogenesis.                                                    |
| HOXD8     | homeo box D8                                                               | NM_019558 |         |         | 3.861     | 0.711   | 2.087      | 0.76    | 2.309       | 1.187   | Regulation of transcription, DNA-dependent. Development. Determination of anterior/posterior axis, embryo.                               |
| HCK       | hemopoietic cell kinase isoform p61HCK                                     | NM_002110 |         |         | 2.534     | 0.629   | 3.012      | 0.865   | 2.693       | 0.799   | Protein amino acid phosphorylation. Intracellular signaling cascade. Mesoderm development.                                               |
| NEUROD1   | neurogenic differentiation 1                                               | NM_002500 |         |         | 3.588     | 0.313   | 2.044      | 0.392   | 2.524       | 0.681   | Transcription. Regulation of transcription, DNA-dependent. Neurogenesis. Cell differentiation.                                           |
| LPL       | lipoprotein lipase precursor                                               | NM_000237 |         |         | 3.848     | 0.625   | 2.304      | 0.786   | 1.99        | 0.925   | Fatty acid metabolism. Circulation. Lipid catabolism.                                                                                    |
| ARX       | aristales related homeobox                                                 | NM_139058 |         |         | 3.24      | 0.465   | 2.566      | 0.502   | 2.268       | 0.779   | Regulation of transcription, DNA-dependent. Development.                                                                                 |
| HAND1     | basic helix-loop-helix transcription factor HAND1                          | NM_004821 |         |         | 3.306     | 0.248   | 2.599      | 0.237   | 2.153       | 0.442   | Regulation of transcription, DNA-dependent. Transcription from RNA polymerase II promoter. Development.                                  |

|                |                                                                    |              |       |       |       |       |       |       |       |       |                                                                                                                                       |
|----------------|--------------------------------------------------------------------|--------------|-------|-------|-------|-------|-------|-------|-------|-------|---------------------------------------------------------------------------------------------------------------------------------------|
| NKX2-3         | * NK2 transcription factor related, locus 3"                       | NM_145285    |       |       | 3.129 | 0.629 | 2.155 | 0.291 | 2.759 | 0.494 |                                                                                                                                       |
| TBX1           | T-box 1 isoform C                                                  | NM_080647    |       |       | 2.408 | 1.12  | 2.72  | 0.424 | 2.87  | 0.753 | Regulation of transcription from RNA polymerase II promoter. Heart development. Morphogenesis.                                        |
| SNCB           | beta-synuclein                                                     | NM_001001502 |       |       | 4.054 | 0.805 | 1.082 | 0.328 | 2.862 | 0.921 |                                                                                                                                       |
| WIT-1          | Wilms tumor associated protein                                     | NM_015855    |       |       | 3.713 | 0.417 | 2.208 | 0.421 | 2.068 | 0.334 | Cell proliferation.                                                                                                                   |
| N/A            | N/A                                                                | AK125569     |       |       | 3.132 | 0.636 | 2.144 | 0.435 | 2.687 | 0.729 |                                                                                                                                       |
| EN2            | engrailed homolog 2                                                | NM_001427    |       |       | 3.475 | 0.934 | 1.801 | 0.418 | 2.685 | 0.477 | Regulation of transcription, DNA-dependent. Development.                                                                              |
| N/A            | N/A                                                                | AK126665     |       |       | 2.745 | 0.419 | 2.61  | 0.552 | 2.588 | 0.449 |                                                                                                                                       |
| N/A            | N/A                                                                | AK123661     |       |       | 3.227 | 0.58  | 2.248 | 0.436 | 2.46  | 0.433 |                                                                                                                                       |
| SIDT1          | * SID1 transmembrane family, member 1"                             | NM_017699    |       |       | 4.454 | 0.454 | 1.193 | 0.697 | 2.178 | 0.568 |                                                                                                                                       |
| KIAA0322       | N/A                                                                | AB002320     |       |       | 3.263 | 0.56  | 2.043 | 0.796 | 2.519 | 0.689 | Ubiquitin cycle.                                                                                                                      |
| SPON1          | * spondin 1, extracellular matrix protein"                         | NM_006108    |       |       | 2.742 | 0.893 | 2.433 | 0.945 | 2.65  | 0.948 | Cell adhesion. Development.                                                                                                           |
| BCAN           | brevican isoform 1                                                 | NM_021948    |       |       | 3.29  | 0.551 | 1.853 | 0.667 | 2.679 | 0.603 | Cell adhesion.                                                                                                                        |
| N/A            | N/A                                                                | AK022595     |       |       | 3.709 | 0.534 | 2.414 | 0.548 | 1.679 | 0.583 | Protein amino acid phosphorylation. Signal transduction. Alcohol metabolism. Lipid metabolism. Metabolism.                            |
| DLX5           | distal-less homeo box 5                                            | NM_005221    |       |       | 3.162 | 0.899 | 1.925 | 0.487 | 2.687 | 0.889 | Skeletal development. Regulation of transcription, DNA-dependent. Development. Neurogenesis.                                          |
| PRAC           | small nuclear protein PRAC                                         | NM_032391    |       |       | 3.769 | 0.483 | 1.915 | 0.83  | 2.089 | 0.578 |                                                                                                                                       |
| FOXL2          | forkhead box L2                                                    | NM_023067    |       |       | 3.344 | 0.696 | 2.237 | 0.665 | 2.184 | 0.575 | Transcription. Regulation of transcription, DNA-dependent.                                                                            |
| ROBO3          | * roundabout, axon guidance receptor, homolog 3"                   | NM_022370    |       |       | 3.396 | 0.354 | 1.85  | 0.488 | 2.516 | 0.416 | Chemotaxis. Neurogenesis. Sensory perception. Cell differentiation.                                                                   |
| NEUROG2        | neurogenin 2                                                       | NM_024019    |       |       | 3.672 | 0.656 | 2.33  | 0.879 | 1.723 | 0.788 |                                                                                                                                       |
| LHX5           | LIM homeobox protein 5                                             | NM_022363    |       |       | 2.848 | 0.605 | 2.069 | 0.498 | 2.784 | 0.451 | Regulation of transcription, DNA-dependent. Central nervous system development.                                                       |
| HOXD4          | homeo box D4                                                       | NM_014621    |       |       | 2.936 | 0.551 | 2.081 | 0.464 | 2.681 | 0.381 | Regulation of transcription, DNA-dependent. Development.                                                                              |
| FEV            | FEV (ETS oncogene family)                                          | NM_017521    |       |       | 2.494 | 0.71  | 2.128 | 0.559 | 3.074 | 0.454 | Regulation of transcription, DNA-dependent. Transcription from RNA polymerase II promoter.                                            |
| CHX10          | ceh-10 homeo domain containing homolog                             | NM_182894    |       |       | 3.114 | 0.409 | 1.908 | 0.827 | 2.623 | 0.504 |                                                                                                                                       |
| IPF1           | * insulin promoter factor 1, homeodomain transcription factor"     | NM_000209    | 1.327 | 1.266 | 3.809 | 0.669 | 2.059 | 0.504 | 1.772 | 0.86  | Generation of precursor metabolites and energy. Regulation of transcription, DNA-dependent. Development. Organogenesis.               |
| ZNF312         | zinc finger protein 312                                            | NM_018008    |       |       | 3.207 | 0.272 | 2.31  | 0.26  | 2.086 | 0.449 |                                                                                                                                       |
| DKFZp686B14266 | hypothetical protein cDNA DKFZp686B14266 (from clone DKFz BX640762 |              |       |       | 3.324 | 0.622 | 1.994 | 0.88  | 2.274 | 0.657 |                                                                                                                                       |
| HOXC11         | homeo box C11                                                      | NM_014212    |       |       | 2.651 | 0.652 | 2.299 | 0.523 | 2.632 | 0.489 | Regulation of transcription, DNA-dependent. Development. Endoderm development.                                                        |
| PRDM12         | PR domain containing 12                                            | NM_021619    |       |       | 2.484 | 0.652 | 2.88  | 0.754 | 2.21  | 0.86  | Transcription. Regulation of transcription, DNA-dependent.                                                                            |
| KIAA1788       | KIAA1788 protein                                                   | AB058691     |       |       | 3.346 | 0.581 | 2.213 | 0.375 | 2.007 | 0.53  | Skeletal development. Skeletal development. Regulation of transcription, DNA-dependent. Development.                                  |
| N/A            | N/A                                                                | AK123662     | 1.111 | 0.692 | 2.784 | 0.316 | 2.011 | 0.442 | 2.79  | 0.326 |                                                                                                                                       |
| HOXC12         | homeo box C12                                                      | NM_173860    |       |       | 3.233 | 0.412 | 1.98  | 0.477 | 2.347 | 0.426 |                                                                                                                                       |
| HOXA10         | homeobox protein A10 isoform a                                     | NM_018951    |       |       | 3.088 | 0.339 | 2.146 | 0.503 | 2.317 | 0.642 | Regulation of transcription, DNA-dependent. Development. Spermatogenesis.                                                             |
| SIX3           | sine oculis homeobox homolog 3                                     | NM_005413    | 1.002 | 1.309 | 3.107 | 0.28  | 2.298 | 0.331 | 2.139 | 0.459 | Regulation of transcription, DNA-dependent. Brain development. Visual perception.                                                     |
| GDF7           | growth differentiation factor 7                                    | NM_182828    |       |       | 3.053 | 0.582 | 2.669 | 0.668 | 1.814 | 0.729 |                                                                                                                                       |
| EN1            | engrailed homolog 1                                                | NM_001426    |       |       | 2.923 | 0.417 | 2.069 | 0.388 | 2.506 | 0.325 | Skeletal development. Regulation of transcription, DNA-dependent. Morphogenesis.                                                      |
| OG12           | homeodomain protein                                                | AF022654     |       |       | 3.509 | 0.499 | 1.784 | 0.349 | 2.191 | 0.664 | Skeletal development. Regulation of transcription, DNA-dependent. Development. Neurogenesis. Heart development.                       |
| CART1          | cartilage paired-class homeoprotein 1                              | NM_006982    |       |       | 3.292 | 0.547 | 1.912 | 0.676 | 2.277 | 0.463 | Cartilage condensation. Regulation of transcription, DNA-dependent. Transcription from RNA polymerase II promoter. Brain Development. |
| MSI1           | musashi 1                                                          | NM_002442    |       |       | 2.596 | 0.594 | 2.354 | 0.414 | 2.529 | 0.881 | Neurogenesis.                                                                                                                         |
| POMC           | proopiomelanocortin                                                | NM_000939    |       |       | 2.984 | 0.657 | 1.654 | 0.553 | 2.832 | 0.75  | Generation of precursor metabolites and energy. Signal transduction. Neuropeptide signaling pathway. Cell-cell signaling.             |
| FKHL15         | DNA binding protein FKHL15                                         | U89995       |       |       | 3.393 | 0.92  | 2.101 | 0.849 | 1.949 | 0.739 | Negative regulation of transcription from RNA polymerase II promoter. Transcription.                                                  |
| SLC6A20        | X transporter protein 3 isoform 1                                  | NM_020208    |       |       | 3.506 | 0.356 | 1.97  | 0.431 | 1.959 | 0.542 | Neurotransmitter transport.                                                                                                           |
| C6orf141       | hypothetical protein MGC46457                                      | NM_153344    |       |       | 3.444 | 0.606 | 2.189 | 0.441 | 1.772 | 0.552 |                                                                                                                                       |
| KCNN1          | * potassium intermediate/small conductance calcium-activated       | NM_002248    |       |       | 2.747 | 0.481 | 2.37  | 0.445 | 2.287 | 0.348 | Ion transport. Potassium ion transport. Synaptic transmission.                                                                        |
| TFCP2L4        | TFCP2L4 protein                                                    | BC036890     |       |       | 3.252 | 0.282 | 1.592 | 0.495 | 2.557 | 0.547 |                                                                                                                                       |
| CDX2           | caudal type homeo box transcription factor 2                       | NM_001265    |       |       | 3.111 | 0.814 | 1.941 | 0.777 | 2.341 | 0.802 |                                                                                                                                       |
| CCND2          | cyclin D2                                                          | NM_001759    |       |       | 3.299 | 0.562 | 2.276 | 0.999 | 1.816 | 0.623 | Regulation of cell cycle. Cytokinesis.                                                                                                |
| HOXD3          | homeo box D3                                                       | NM_006898    |       |       | 2.903 | 0.556 | 1.666 | 0.495 | 2.82  | 0.696 | Regulation of transcription, DNA-dependent. Morphogenesis.                                                                            |
| C20orf103      | chromosome 20 open reading frame 103 precursor                     | NM_012261    |       |       | 3.245 | 0.41  | 1.727 | 0.39  | 2.415 | 0.673 |                                                                                                                                       |
| EMX1           | empty spiracles homolog 1                                          | NM_004097    | 1.601 | 1.226 | 3.243 | 0.55  | 2.578 | 0.492 | 1.55  | 0.543 | Regulation of transcription, DNA-dependent. Development.                                                                              |
| CKMT1          | * ubiquitous mitochondrial creatine kinase, precursor"             | BC001926     |       |       | 2.234 | 0.893 | 2.406 | 0.572 | 2.71  | 0.481 |                                                                                                                                       |
| BARHL1         | BarH-like 1                                                        | NM_020064    |       |       | 2.894 | 0.934 | 2.365 | 0.842 | 2.089 | 0.607 | Regulation of transcription, DNA-dependent.                                                                                           |
| DLX4           | DLX4 protein                                                       | BC014419     |       |       | 2.411 | 0.567 | 2.588 | 0.465 | 2.346 | 0.606 | Regulation of transcription, DNA-dependent. Regulation of transcription, DNA-dependent. Development.                                  |
| HPX-6          | N/A                                                                | X74863       |       |       | 3.288 | 0.707 | 2.068 | 0.491 | 1.985 | 0.801 |                                                                                                                                       |
| MGC16664       | hypothetical protein MGC16664                                      | NM_173509    |       |       | 2.736 | 0.817 | 2.245 | 0.982 | 2.355 | 0.579 |                                                                                                                                       |
| MT1G           | MT1G protein                                                       | BC020757     |       |       | 2.662 | 0.488 | 2.071 | 0.537 | 2.588 | 0.633 |                                                                                                                                       |
| LBX1           | transcription factor similar to D. melanogaster homeodomain p      | NM_006562    |       |       | 2.849 | 0.419 | 2.623 | 0.77  | 1.839 | 0.595 | Regulation of transcription, DNA-dependent. Morphogenesis.                                                                            |
| RHBDL4         | * rhomboid, veinlet-like 4"                                        | NM_138328    | 1.096 | 1.345 | 2.438 | 1.143 | 2.38  | 0.985 | 2.465 | 1.073 |                                                                                                                                       |

|           |                                                                 |              |       |       |       |       |       |       |                                                                                                                           |
|-----------|-----------------------------------------------------------------|--------------|-------|-------|-------|-------|-------|-------|---------------------------------------------------------------------------------------------------------------------------|
| HOXC9     | homeo box C9                                                    | NM_006897    | 2.695 | 0.507 | 2.456 | 0.777 | 2.132 | 0.498 | Regulation of transcription, DNA-dependent. Development.                                                                  |
| HRK       | harakiri                                                        | NM_003806    | 3.089 | 0.898 | 1.38  | 0.682 | 2.809 | 0.784 | Induction of apoptosis. Negative regulation of survival gene product activity. Regulation of apoptosis                    |
| LOC222171 | hypothetical protein LOC222171                                  | NM_175887    | 2.548 | 0.205 | 2.491 | 0.299 | 2.231 | 0.327 |                                                                                                                           |
| DMRT3     | doublesex and mab-3 related transcription factor 3              | NM_021240    | 3.107 | 1.427 | 2.188 | 1.111 | 1.963 | 1.152 | Regulation of transcription, DNA-dependent. Sex differentiation.                                                          |
| FLJ25477  | FLJ25477 protein                                                | BC032653     | 2.503 | 0.866 | 2.198 | 0.599 | 2.552 | 0.886 |                                                                                                                           |
| N/A       | N/A                                                             | AK075440     | 3.565 | 0.653 | 1.11  | 0.993 | 2.573 | 0.69  |                                                                                                                           |
| NRN1      | * neuritin, precursor*                                          | BC042019     | 3.535 | 0.507 | 1.586 | 0.831 | 2.119 | 0.628 |                                                                                                                           |
| FLJ32447  | hypothetical protein FLJ32447                                   | NM_153038    | 3.693 | 0.334 | 1.195 | 0.353 | 2.344 | 0.521 |                                                                                                                           |
| KIAA1465  | KIAA1465 protein                                                | AB040898     | 2.581 | 0.788 | 2.563 | 0.826 | 2.076 | 0.799 |                                                                                                                           |
| NFIB      | nuclear factor I/B                                              | NM_005596    | 3.719 | 0.491 | 2.084 | 0.549 | 1.396 | 0.577 | DNA replication. Transcription. Regulation of transcription, DNA-dependent.                                               |
| ZIC1      | zinc finger protein of the cerebellum 1                         | NM_003412    | 3.583 | 0.574 | 1.916 | 0.622 | 1.696 | 0.648 | Pattern specification. Brain development. Behavior. Regulation of smoothed signaling pathway                              |
| N/A       | N/A                                                             | AK002097     | 3.136 | 0.781 | 2.004 | 0.595 | 2.05  | 0.89  |                                                                                                                           |
| ZBTB16    | zinc finger and BTB domain containing 16                        | NM_006006    | 2.35  | 0.827 | 2.41  | 0.472 | 2.396 | 0.565 | Regulation of transcription, DNA-dependent. Mesoderm development.                                                         |
| MEGF11    | MEGF11 protein                                                  | NM_032445    | 2.99  | 0.552 | 1.81  | 0.477 | 2.329 | 0.637 |                                                                                                                           |
| CKMT1     | * ubiquitous mitochondrial creatine kinase, precursor*          | BC001926     | 2.003 | 0.926 | 2.406 | 0.572 | 2.71  | 0.481 |                                                                                                                           |
| N/A       | homeobox protein                                                | AJ004949     | 3.079 | 0.7   | 1.99  | 0.57  | 2.049 | 0.791 |                                                                                                                           |
| DUOX1     | dual oxidase 1 precursor                                        | NM_017434    | 2.521 | 0.529 | 2.17  | 0.449 | 2.42  | 0.507 | Electron transport. Superoxide release. Hydrogen peroxide biosynthesis.                                                   |
| FOXD4     | forkhead box D4 protein                                         | AF452724     | 2.684 | 0.413 | 2.022 | 0.427 | 2.398 | 0.346 | Transcription. Regulation of transcription, DNA-dependent.                                                                |
| FLJ43965  | FLJ43965 protein                                                | NM_207406    | 2.865 | 0.582 | 2.024 | 0.613 | 2.213 | 0.45  |                                                                                                                           |
| PAX7      | paired box gene 7 isoform 1                                     | NM_002584    | 2.809 | 0.847 | 2.138 | 0.479 | 2.15  | 0.712 | Regulation of transcription, DNA-dependent. Anti-apoptosis. Morphogenesis.                                                |
| BARHL2    | BarH-like 2                                                     | NM_020063    | 3.27  | 1.068 | 1.946 | 0.712 | 1.88  | 0.986 |                                                                                                                           |
| MGC26690  | hypothetical protein MGC26690                                   | NM_152450    | 3.239 | 0.883 | 1.726 | 0.663 | 2.123 | 0.756 |                                                                                                                           |
| LOC164153 | similar to RIKEN cDNA 4930522D07                                | NM_203412    | 1.944 | 0.37  | 1.922 | 0.316 | 3.203 | 0.457 |                                                                                                                           |
| VAX1      | ventral anterior homeobox 1                                     | NM_199131    | 2.761 | 0.775 | 2.057 | 0.691 | 2.222 | 0.891 |                                                                                                                           |
| ADRA1A    | alpha 1A adrenoceptor isoform 5b                                | AY491780     | 1.93  | 0.759 | 2.429 | 0.524 | 2.675 | 0.483 |                                                                                                                           |
| FLJ46347  | hypothetical LOC389064                                          | NM_001005303 | 3.913 | 0.37  | 1.306 | 0.643 | 1.808 | 0.668 |                                                                                                                           |
| SLC28A10  | * solute carrier family 26, member 10*                          | NM_133489    | 2.102 | 0.654 | 2.452 | 0.406 | 2.437 | 0.32  | Regulation of transcription, DNA-dependent.                                                                               |
| FOXP1B    | forkhead box G1B                                                | BC050072     | 4.068 | 0.322 | 1.288 | 0.356 | 1.63  | 0.549 | Transcription. Regulation of transcription, DNA-dependent. Regulation of transcription, DNA-dependent. Brain development. |
| GPR145    | G protein-coupled receptor 145                                  | NM_032503    | 3.235 | 0.572 | 1.779 | 0.516 | 1.964 | 0.517 | Signal transduction. G-protein coupled receptor protein signaling pathway.                                                |
| HOXD11    | homeo box D11                                                   | NM_021192    | 3.179 | 0.469 | 2.065 | 0.579 | 1.724 | 0.616 | Regulation of transcription, DNA-dependent. Development.                                                                  |
| ATOH1     | atonal homolog 1                                                | NM_005172    | 3.675 | 0.722 | 1.318 | 0.572 | 1.968 | 0.99  | Regulation of transcription, DNA-dependent. Central nervous system development.                                           |
| RAX       | RAX protein                                                     | BC051901     | 2.566 | 0.285 | 2.56  | 0.486 | 1.813 | 0.675 | Transcription, DNA-dependent. Development. Visual perception.                                                             |
| EMX2      | empty spiracles homolog 2                                       | NM_004098    | 3.016 | 0.38  | 1.973 | 0.473 | 1.941 | 0.232 | Regulation of transcription, DNA-dependent. Development.                                                                  |
| TFAP2C    | transcription factor AP-2 gamma                                 | NM_003222    | 2.921 | 1.035 | 1.701 | 0.757 | 2.306 | 0.853 | Transcription. Regulation of transcription from RNA polymerase II promoter. Cell-cell signaling.                          |
| N/A       | PRO2206                                                         | AF119866     | 2.515 | 0.427 | 2.174 | 0.603 | 2.238 | 0.431 |                                                                                                                           |
| HOXB13    | homeo box B13                                                   | NM_006361    | 3.136 | 0.568 | 1.799 | 0.38  | 1.964 | 0.469 | Regulation of transcription, DNA-dependent. Development. Epidermis development. Response to wounding.                     |
| CYP24A1   | * cytochrome P450, family 24 precursor*                         | NM_000782    | 2.957 | 1.253 | 2.084 | 1.039 | 1.854 | 0.999 | Electron transport.                                                                                                       |
| N/A       | N/A                                                             | AK125426     | 3.939 | 0.419 | 1.024 | 0.403 | 1.927 | 0.613 | Protein ubiquitination.                                                                                                   |
| N/A       | CCK-B/gastrin receptor/alternatively spliced.                   | AF239668     | 2.299 | 0.661 | 2.007 | 0.431 | 2.584 | 0.464 | Phospholipase C activation. Phospholipase C activation. Positive regulation of cytosolic calcium ion concentration.       |
| EFNA1     | ephrin A1 isoform a precursor                                   | NM_004428    | 3.016 | 0.551 | 1.738 | 0.507 | 2.132 | 0.615 | Cell-cell signaling.                                                                                                      |
| N/A       | N/A                                                             | AK098343     | 2.366 | 0.943 | 2     | 0.547 | 2.491 | 0.905 |                                                                                                                           |
| JPH3      | JPH3 protein                                                    | BC008690     | 2.384 | 0.501 | 2.336 | 0.514 | 2.133 | 0.672 |                                                                                                                           |
| N/A       | choline acetyltransferase isoform S                             | AF305908     | 1.582 | 0.683 | 2.53  | 0.433 | 2.739 | 0.37  | Synaptic transmission. Neurotransmitter biosynthesis.                                                                     |
| NKX6-1    | * NK6 transcription factor related, locus 1*                    | NM_006168    | 3.34  | 0.772 | 2.212 | 0.743 | 1.292 | 0.43  | Regulation of transcription, DNA-dependent. Development. Organogenesis.                                                   |
| N/A       | sodium dependent phosphate transporter isoform NaPi-1b          | AF146796     | 3.048 | 0.745 | 1.566 | 0.452 | 2.192 | 0.92  | Phosphate metabolism. Phosphate transport.                                                                                |
| SORL1     | sortilin-related receptor containing LDLR class A repeats prepr | NM_003105    | 2.515 | 0.486 | 2.251 | 0.924 | 2.038 | 1.054 | Lipid metabolism. Lipid transport. Receptor mediated endocytosis. Steroid metabolism. Cholesterol metabolism.             |
| N/A       | N/A                                                             | AK124550     | 2.533 | 0.303 | 1.637 | 0.25  | 2.625 | 0.28  |                                                                                                                           |
| EOMES     | eomesodermin                                                    | NM_005442    | 3.571 | 0.967 | 1.541 | 0.704 | 1.681 | 0.863 | Transcription. Regulation of transcription, DNA-dependent. Morphogenesis.                                                 |
| GATA4     | GATA binding protein 4                                          | NM_002052    | 1.986 | 0.608 | 2.485 | 0.7   | 2.321 | 0.586 | Regulation of transcription, DNA-dependent. Development.                                                                  |
| CACNG4    | voltage-dependent calcium channel gamma-4 subunit               | NM_014405    | 3.143 | 1.173 | 1.335 | 0.385 | 2.31  | 0.931 | Ion transport. Calcium ion transport.                                                                                     |
| GFRA1     | GDNF family receptor alpha 1 isoform a preproprotein            | NM_005264    | 3.134 | 0.302 | 1.684 | 0.638 | 1.966 | 0.458 | Cell surface receptor linked signal transduction.                                                                         |
| THBS4     | thrombospondin 4 precursor                                      | NM_003248    | 3.839 | 0.503 | 1.128 | 0.389 | 1.814 | 0.333 | Substrate-bound cell migration, cell extension. Cell adhesion.                                                            |
| LHX2      | LIM homeobox protein 2                                          | NM_004789    | 3.019 | 0.795 | 1.824 | 0.645 | 1.918 | 0.698 | Regulation of transcription, DNA-dependent.                                                                               |
| TFCP2L3   | transcription factor CP2-like 3                                 | NM_024915    | 2.485 | 0.814 | 1.793 | 0.529 | 2.478 | 0.53  |                                                                                                                           |
| HOXA9     | homeobox protein A9 isoform a                                   | NM_152739    | 3.518 | 0.436 | 1.769 | 0.588 | 1.458 | 0.343 | Transcription. Regulation of transcription, DNA-dependent. Development.                                                   |
| TRIM36    | tripartite motif protein 36                                     | NM_016700    | 3.839 | 0.325 | 1.279 | 0.568 | 1.604 | 0.521 | Protein ubiquitination.                                                                                                   |

|              |                                                                   |           |       |       |       |       |       |       |                                                                                                                      |       |                                                                                                          |
|--------------|-------------------------------------------------------------------|-----------|-------|-------|-------|-------|-------|-------|----------------------------------------------------------------------------------------------------------------------|-------|----------------------------------------------------------------------------------------------------------|
| RIPK4        | ankyrin repeat domain 3                                           | NM_020639 | 3.663 | 0.365 | 1.359 | 0.396 | 1.699 | 0.549 | Protein amino acid phosphorylation. Protein amino acid phosphorylation.                                              |       |                                                                                                          |
| PRDM6        | PR-domain zinc finger protein 6 isoform Aalternatively spliced.   | AF272898  | 2.959 | 0.275 | 1.758 | 0.677 | 2.003 | 0.421 | Transcription. Regulation of transcription, DNA-dependent                                                            |       |                                                                                                          |
| ZAR1         | zygote arrest 1                                                   | NM_175619 | 3.069 | 0.763 | 1.744 | 0.641 | 1.901 | 0.966 |                                                                                                                      |       |                                                                                                          |
| HOXC10       | homeo box C10                                                     | NM_017409 | 2.635 | 1.123 | 1.916 | 0.774 | 2.162 | 0.659 | Regulation of transcription, DNA-dependent. Positive regulation of cell proliferation. Morphogenesis.                |       |                                                                                                          |
| IRX3         | iroquois homeobox protein 3                                       | NM_024336 | 2.517 | 0.895 | 1.982 | 0.82  | 2.197 | 0.782 | Regulation of transcription, DNA-dependent.                                                                          |       |                                                                                                          |
| DMRTA2       | doublesex-mab-3 (DM) domain                                       | AJ301580  | 2.873 | 0.596 | 1.739 | 0.608 | 2.08  | 0.781 |                                                                                                                      |       |                                                                                                          |
| MASS1        | very large G-protein coupled receptor 1                           | NM_032119 | 3.562 | 0.479 | 1.554 | 0.381 | 1.57  | 0.887 | Cell communication. Neuropeptide signaling pathway. Neurogenesis. Cell-cell adhesion.                                |       |                                                                                                          |
| COL25A1      | COL25A1 protein                                                   | BC036669  | 3.117 | 0.436 | 2.053 | 0.57  | 1.507 | 0.416 | Phosphate transport. Cell adhesion.                                                                                  |       |                                                                                                          |
| HOXB8        | homeo box B8                                                      | NM_024016 | 3.903 | 0.312 | 1.441 | 0.585 | 1.332 | 0.4   | Regulation of transcription, DNA-dependent. Development.                                                             |       |                                                                                                          |
| HOXC8        | homeo box C8                                                      | NM_022658 | 2.74  | 0.624 | 1.829 | 0.542 | 2.093 | 0.777 | Regulation of transcription, DNA-dependent. Development.                                                             |       |                                                                                                          |
| sox-10       | SOX-10                                                            | X65666    | 2.737 | 0.726 | 2.222 | 0.716 | 1.701 | 0.819 |                                                                                                                      |       |                                                                                                          |
| GRID2        | * glutamate receptor, ionotropic, delta 2*                        | NM_001510 | 3.383 | 0.615 | 1.667 | 0.696 | 1.61  | 0.316 | Ion transport. Glutamate signaling pathway. Synaptic transmission                                                    |       |                                                                                                          |
| MT1J         | metallothionein 1J                                                | NM_175622 | 2.866 | 0.418 | 1.688 | 0.457 | 2.105 | 0.556 |                                                                                                                      |       |                                                                                                          |
| COL2A1       | alpha 1 type II collagen isoform 1                                | NM_001844 | 2.637 | 0.734 | 2.06  | 0.682 | 1.958 | 0.815 | Skeletal development. Phosphate transport. Cell adhesion. Perception of sound.                                       |       |                                                                                                          |
| ALX3         | aristales-like homeobox 3                                         | NM_006492 | 3.077 | 1.194 | 1.335 | 0.546 | 2.239 | 0.949 | Regulation of transcription, DNA-dependent. Development.                                                             |       |                                                                                                          |
| COLEC12      | collectin sub-family member 12 isoform II                         | NM_030781 | 3.132 | 0.947 | 1.98  | 0.861 | 1.534 | 0.84  | Phosphate transport. Phagocytosis, recognition. Carbohydrate mediated signaling.                                     |       |                                                                                                          |
| ALOX15       | arachidonate 15-lipoxygenase                                      | NM_001140 | 2.241 | 0.251 | 2.004 | 0.221 | 2.393 | 0.48  | Electron transport. Lipid metabolism. Inflammatory response. Leukotriene biosynthesis.                               |       |                                                                                                          |
| LIPG         | endothelial lipase                                                | NM_006033 | 2.463 | 0.462 | 2.104 | 0.652 | 2.052 | 0.592 | Lipid metabolism. Lipid catabolism.                                                                                  |       |                                                                                                          |
| N/A          | N/A                                                               | AK127166  | 2.943 | 0.306 | 1.949 | 0.587 | 1.7   | 0.775 |                                                                                                                      |       |                                                                                                          |
| GABRA2       | GABRA2 protein                                                    | BC022488  | 2.801 | 0.966 | 1.971 | 0.908 | 1.814 | 1.015 |                                                                                                                      |       |                                                                                                          |
| H2AFY2       | core histone macroH2A2.2                                          | BC016172  | 2.472 | 0.546 | 1.731 | 0.511 | 2.379 | 0.461 | Nucleosome assembly. Chromosome organization and biogenesis (sensu Eukaryota).                                       |       |                                                                                                          |
| N/A          | winged helix transcription factor beta                            | AF343006  | 2.523 | 0.597 | 1.857 | 0.492 | 2.202 | 0.311 |                                                                                                                      |       |                                                                                                          |
| N/A          | N/A                                                               | AK096981  | 2.963 | 0.522 | 1.711 | 0.45  | 1.906 | 0.478 | Protein amino acid phosphorylation. Signal transduction. Alcohol metabolism. Lipid metabolism.                       |       |                                                                                                          |
| DLX3         | distal-less homeo box 3                                           | NM_005220 | 2.569 | 0.735 | 1.621 | 0.412 | 2.381 | 0.633 | Skeletal development. Regulation of transcription, DNA-dependent. Development.                                       |       |                                                                                                          |
| NPR1         | natriuretic peptide receptor A/guanylate cyclase A (atrionatriure | NM_000906 | 3.132 | 1.738 | 1.225 | 0.405 | 2.914 | 0.379 | 2.427                                                                                                                | 0.513 | CGMP biosynthesis. Protein amino acid phosphorylation. Cell surface receptor linked signal transduction. |
| T            | transcription factor T                                            | NM_003181 | 2.009 | 0.685 | 2.205 | 0.547 | 2.349 | 0.47  | Regulation of transcription, DNA-dependent. Signal transduction. Mesoderm.                                           |       |                                                                                                          |
| PAX2         | paired box protein 2 isoform c                                    | NM_003988 | 2.536 | 0.577 | 2.167 | 0.438 | 1.857 | 0.489 | GTP biosynthesis. UTP biosynthesis. CTP biosynthesis. Regulation of transcription.                                   |       |                                                                                                          |
| TBR1         | * T-box, brain, 1*                                                | NM_006593 | 3.568 | 0.878 | 1.308 | 0.791 | 1.683 | 0.942 | Transcription. Regulation of transcription, DNA-dependent. Brain development.                                        |       |                                                                                                          |
| LOC405753    | similar to Numb-interacting homolog protein                       | NM_207581 | 1.571 | 0.78  | 2.442 | 0.443 | 2.541 | 0.38  |                                                                                                                      |       |                                                                                                          |
| N/A          | N/A                                                               | AK125088  | 2.973 | 0.204 | 1.804 | 0.599 | 1.771 | 0.561 |                                                                                                                      |       |                                                                                                          |
| N/A          | N/A                                                               | AK126468  | 2.053 | 0.767 | 1.833 | 0.845 | 2.654 | 0.555 | CAMP biosynthesis. Intracellular signaling cascade.                                                                  |       |                                                                                                          |
| LRP2         | low density lipoprotein-related protein 2                         | NM_004525 | 2.749 | 0.452 | 1.546 | 0.345 | 2.239 | 0.501 | Protein amino acid glycosylation. Lipid metabolism. Receptor mediated endocytosis.                                   |       |                                                                                                          |
| SFRP2        | secreted frizzled-related protein 2 precursor                     | NM_003013 | 2.901 | 0.817 | 1.535 | 0.644 | 2.078 | 0.789 | Wnt receptor signaling pathway. Cell differentiation.                                                                |       |                                                                                                          |
| N/A          | N/A                                                               | M23102    | 2.328 | 0.668 | 2.178 | 0.473 | 1.998 | 0.735 | Protein amino acid phosphorylation. Transmembrane receptor protein tyrosine kinase signaling pathway.                |       |                                                                                                          |
| CXCL14       | small inducible cytokine B14 precursor                            | NM_004887 | 2.221 | 0.732 | 1.813 | 0.675 | 2.47  | 0.749 | Chemotaxis. Inflammatory response. Signal transduction. Cell-cell signaling.                                         |       |                                                                                                          |
| N/A          | Unknown (protein for MGC:24860)                                   | BC031812  | 2.223 | 0.643 | 1.761 | 0.633 | 2.512 | 0.659 |                                                                                                                      |       |                                                                                                          |
| SCNN1B       | * sodium channel, nonvoltage-gated 1, beta*                       | BC036352  | 2.331 | 0.74  | 2.028 | 0.574 | 2.129 | 0.437 | Ion transport. Sodium ion transport. Excretion. Sensory perception.                                                  |       |                                                                                                          |
| DLK1         | delta-like homolog                                                | NM_003836 | 1.904 | 0.912 | 1.626 | 0.705 | 2.956 | 0.756 | Development.                                                                                                         |       |                                                                                                          |
| MGC10561     | hypothetical protein MGC10561                                     | BC004252  | 3.659 | 1.302 | 1.688 | 0.975 | 1.127 | 0.689 | Chromatin assembly or disassembly. Regulation of transcription, DNA-dependent. Negative regulation of transcription. |       |                                                                                                          |
| ZBTB8        | zinc finger and BTB domain containing 8                           | NM_144621 | 3.546 | 1.04  | 1.458 | 0.466 | 1.459 | 0.676 | Transcription. Regulation of transcription, DNA-dependent                                                            |       |                                                                                                          |
| DKFZp434H168 | hypothetical proteincDNA DKFZp434H168 (from clone DKFZp           | AL117580  | 2.636 | 1.259 | 1.426 | 0.425 | 2.392 | 0.726 |                                                                                                                      |       |                                                                                                          |
| HOXD1        | homeo box D1                                                      | NM_024501 | 2.73  | 1.14  | 1.86  | 0.641 | 1.857 | 0.631 | Regulation of transcription, DNA-dependent. Development.                                                             |       |                                                                                                          |
| WNT3         | * wingless-type MMTV integration site family, member 3*           | NM_030753 | 2.032 | 0.747 | 2.667 | 0.364 | 1.747 | 0.588 | Frizzled-2 signaling pathway. Cell-cell signaling. Morphogenesis.                                                    |       |                                                                                                          |
| SPAG6        | sperm associated antigen 6 isoform 1                              | NM_012443 | 3.267 | 0.57  | 1.567 | 0.287 | 1.606 | 0.479 | Spermatid cell development.                                                                                          |       |                                                                                                          |
| N/A          | Unknown (protein for MGC:75260)                                   | BC067110  | 2.325 | 0.579 | 1.908 | 0.483 | 2.205 | 0.591 |                                                                                                                      |       |                                                                                                          |
| WNT6         | * wingless-type MMTV integration site family, member 6 precu      | NM_006522 | 1.979 | 0.843 | 2.19  | 0.977 | 2.268 | 0.933 | Frizzled-2 signaling pathway. Cell-cell signaling. Development.                                                      |       |                                                                                                          |
| MYH11        | smooth muscle myosin heavy chain 11 isoform SM2                   | NM_022844 | 2.895 | 0.472 | 1.929 | 0.397 | 1.612 | 0.565 | Striated muscle contraction. Muscle development.                                                                     |       |                                                                                                          |
| HOXD10       | homeo box D10                                                     | NM_002148 | 2.408 | 0.503 | 1.782 | 0.331 | 2.225 | 0.679 | Regulation of transcription, DNA-dependent. Development.                                                             |       |                                                                                                          |
| N/A          | N/A                                                               | AK125319  | 2.627 | 0.522 | 2.157 | 0.436 | 1.621 | 0.437 |                                                                                                                      |       |                                                                                                          |
| FLJ33651     | hypothetical protein FLJ33651                                     | NM_182590 | 2.773 | 0.504 | 1.189 | 0.491 | 2.441 | 0.763 |                                                                                                                      |       |                                                                                                          |
| NEUROG1      | neurogenin 1                                                      | NM_006161 | 2.25  | 0.799 | 1.995 | 0.639 | 2.153 | 0.692 | Transcription. Regulation of transcription from RNA polymerase II promoter. Neurogenesis. Cell differentiation.      |       |                                                                                                          |
| OCLN         | occludin                                                          | NM_002538 | 3.46  | 1.403 | 1.659 | 0.71  | 1.276 | 0.745 | Protein complex assembly.                                                                                            |       |                                                                                                          |
| IRS4         | insulin receptor substrate 4                                      | NM_003604 | 2.977 | 0.795 | 1.896 | 0.737 | 1.514 | 0.706 | Signal transduction.                                                                                                 |       |                                                                                                          |
| JPH4         | junctophilin 4                                                    | NM_032452 | 2.109 | 0.49  | 1.655 | 0.563 | 2.614 | 0.411 |                                                                                                                      |       |                                                                                                          |
| TCF2         | transcription factor 2 isoform bLF-B3 * variant hepatic nuclear f | NM_006481 | 2.42  | 0.44  | 1.702 | 0.686 | 2.25  | 0.545 | Regulation of transcription, DNA-dependent. Positive regulation of transcription.                                    |       |                                                                                                          |
| N/A          | * prostaglandin E receptor, subtype EP3C*                         | X83860    | 2.74  | 0.516 | 1.779 | 0.516 | 1.85  | 0.697 | Transcription, DNA-dependent. Signal transduction. G-protein coupled receptor protein signaling pathway.             |       |                                                                                                          |

|          |                                                                   |              |       |       |       |       |       |       |                                                                                                                         |
|----------|-------------------------------------------------------------------|--------------|-------|-------|-------|-------|-------|-------|-------------------------------------------------------------------------------------------------------------------------|
| LECT1    | LECT1 protein                                                     | BC025659     | 2.318 | 0.553 | 1.738 | 0.275 | 2.305 | 0.383 | Skeletal development. Proteoglycan metabolism. Cell differentiation.                                                    |
| LMO1     | LIM domain only 1                                                 | NM_002315    | 2.531 | 0.505 | 2.36  | 0.562 | 1.463 | 0.498 | Development. Cell proliferation.                                                                                        |
| TITF1    | thyroid transcription factor 1                                    | NM_003317    | 2.823 | 0.477 | 1.869 | 0.541 | 1.643 | 0.703 | Regulation of transcription, DNA-dependent. Regulation of transcription, DNA-dependent.                                 |
| SP7      | osterix                                                           | NM_152860    | 1.465 | 0.837 | 2.093 | 0.45  | 2.775 | 0.5   |                                                                                                                         |
| KIAA0644 | KIAA0644 protein                                                  | AB014544     | 2.877 | 0.754 | 1.124 | 0.412 | 2.332 | 0.937 |                                                                                                                         |
| FLJ13236 | hypothetical protein FLJ13236                                     | NM_024902    | 3.03  | 0.408 | 1.955 | 0.606 | 1.335 | 0.546 | Protein folding.                                                                                                        |
| N/A      | N/AcDNA DKFZp761F169 (from clone DKFZp761F169).                   | AL833884     | 2.222 | 0.559 | 1.265 | 1.133 | 2.831 | 0.29  |                                                                                                                         |
| RARB     | * retinoic acid receptor, beta isoform 1*                         | NM_000965    | 3.554 | 0.884 | 1.17  | 1.096 | 1.576 | 0.725 | Transcription. Regulation of transcription, DNA-dependent. Signal transduction.                                         |
| MT1A     | metallothionein 1A                                                | NM_005946    | 2.572 | 0.601 | 1.688 | 0.355 | 2.037 | 0.425 |                                                                                                                         |
| N/A      | N/A                                                               | AK125488     | 3.039 | 0.481 | 1.378 | 0.54  | 1.861 | 0.36  |                                                                                                                         |
| N/A      | Unknown (protein for IMAGE:6023106)                               | BC040697     | 3.16  | 0.573 | 1.625 | 0.403 | 1.491 | 0.687 |                                                                                                                         |
| FLJ44881 | FLJ44881 protein                                                  | NM_207461    | 2.112 | 0.742 | 1.632 | 0.698 | 2.524 | 0.514 |                                                                                                                         |
| FOXA1    | forkhead box A1                                                   | NM_004496    | 3.325 | 0.498 | 1.283 | 0.646 | 1.657 | 0.675 | Transcription. Regulation of transcription, DNA-dependent.                                                              |
| RUNX3    | runt-related transcription factor 3                               | NM_004350    | 3.117 | 1.134 | 1.707 | 0.648 | 1.437 | 0.809 | Regulation of transcription, DNA-dependent. Transcription from RNA polymerase II promoter. Cell proliferation.          |
| CR1      | complement component (3b/4b) receptor 1 isoform S                 | NM_000651    | 3.455 | 0.627 | 1.055 | 0.313 | 1.75  | 0.629 | Immune response. Complement activation, classical pathway.                                                              |
| KCNA5    | * potassium voltage-gated channel, shaker-related subfamily, I    | NM_002234    | 2.725 | 0.539 | 1.419 | 0.533 | 2.11  | 0.621 | Cation transport. Potassium ion transport.                                                                              |
| COCH     | * coagulation factor C homolog, cochlin precursor*                | NM_004086    | 2.697 | 0.819 | 1.502 | 0.874 | 2.045 | 1.113 | Perception of sound.                                                                                                    |
| GATA2    | GATA binding protein 2                                            | NM_032638    | 2.903 | 0.407 | 1.422 | 0.521 | 1.916 | 0.748 | Transcription. Regulation of transcription, DNA-dependent. Transcription from RNA polymerase II promoter. Phagocytosis. |
| MLN      | mottlin                                                           | NM_002418    | 2.298 | 0.411 | 1.545 | 0.534 | 2.38  | 0.538 | G-protein coupled receptor protein signaling pathway. Cell-cell signaling. Regulation of physiological process.         |
| RTN4RL2  | reticulin 4 receptor-like 2                                       | NM_178570    | 2.751 | 0.999 | 2     | 1.05  | 1.467 | 1.06  |                                                                                                                         |
| MT1F     | metallothionein 1F                                                | NM_005949    | 2.681 | 0.338 | 1.736 | 0.427 | 1.783 | 0.492 |                                                                                                                         |
| NKX2-2   | * NK2 transcription factor related, locus 2*                      | NM_002509    | 3.152 | 0.473 | 1.457 | 0.576 | 1.576 | 0.687 | Regulation of transcription, DNA-dependent. Development. Brain development.                                             |
| GRIN2D   | N-methyl-D-aspartate receptor subunit 2D precursor                | NM_000836    | 1.786 | 0.946 | 2.151 | 0.685 | 2.24  | 0.528 | Ion transport. Signal transduction. Synaptic transmission.                                                              |
| NKX2-8   | * NK2 transcription factor related, locus 8*                      | NM_014360    | 2.585 | 0.927 | 1.797 | 0.676 | 1.788 | 0.366 | Regulation of transcription, DNA-dependent. Transcription from RNA polymerase II promoter. Development.                 |
| VSX1     | visual system homeobox 1 protein isoform a                        | NM_014588    | 2.22  | 0.678 | 1.783 | 0.657 | 2.158 | 0.774 | Regulation of transcription, DNA-dependent. Development. Sensory perception. Visual perception.                         |
| GRP      | gastrin-releasing peptide                                         | NM_002091    | 2.152 | 0.479 | 2.027 | 0.731 | 1.98  | 0.665 | Signal transduction. Neuropeptide signaling pathway.                                                                    |
| SLC17A7  | * solute carrier family 17, member 7*                             | NM_020309    | 2.822 | 0.623 | 1.008 | 0.587 | 2.317 | 0.833 | Transport. Phosphate transport.                                                                                         |
| KIF12    | kinesin family member 12                                          | NM_138424    | 2.21  | 0.892 | 1.591 | 0.383 | 2.336 | 0.521 |                                                                                                                         |
| KIAA1355 | KIAA1355 protein                                                  | AB037776     | 2.412 | 0.478 | 1.301 | 0.455 | 2.424 | 0.718 |                                                                                                                         |
| OTX2     | orthodenticle 2 isoform a                                         | NM_021728    | 2.768 | 0.77  | 1.479 | 0.604 | 1.883 | 0.338 | Regulation of transcription, DNA-dependent. Regulation of transcription, DNA-dependent. Development. Development.       |
| SEMA5B   | semaphorin 5B                                                     | NM_018987    | 3.069 | 0.444 | 1.103 | 0.739 | 1.956 | 0.563 | Development. Neurogenesis. Cell differentiation.                                                                        |
| AARSL    | AARSL protein                                                     | BC040881     | 1.861 | 0.718 | 2.079 | 1.13  | 2.162 | 1.201 |                                                                                                                         |
| SELV     | selenoprotein V                                                   | NM_182704    | 2.023 | 0.686 | 2.241 | 0.675 | 1.856 | 0.45  |                                                                                                                         |
| RFX4     | regulatory factor X4 isoform c                                    | NM_213594    | 2.399 | 0.467 | 1.907 | 0.456 | 1.793 | 0.465 | Regulation of transcription, DNA-dependent.                                                                             |
| MMP24    | matrix metalloproteinase 24 (membrane-inserted)                   | NM_006690    | 2.004 | 0.741 | 1.696 | 0.625 | 2.394 | 0.623 | Proteolysis and peptidolysis.                                                                                           |
| N/A      | N/A                                                               | AK095610     | 1.749 | 0.722 | 1.655 | 0.406 | 2.69  | 0.432 |                                                                                                                         |
| N/A      | metallothionein                                                   | AF136177     | 2.678 | 0.63  | 1.667 | 0.574 | 1.739 | 0.75  |                                                                                                                         |
| WNT10A   | * wingless-type MMTV integration site family, member 10A, protein | BC052234     | 1.903 | 0.51  | 1.979 | 0.627 | 2.19  | 0.853 | Frizzled-2 signaling pathway. Development.                                                                              |
| PPP1R1B  | * protein phosphatase 1, regulatory (inhibitor) subunit 1B*       | NM_032192    | 1.753 | 0.561 | 1.869 | 0.649 | 2.446 | 0.474 | Signal transduction.                                                                                                    |
| ESR1     | estrogen receptor 1                                               | NM_000125    | 2.136 | 0.83  | 1.492 | 0.817 | 2.429 | 0.855 | Regulation of transcription, DNA-dependent. Signal transduction. Cell growth.                                           |
| HLF      | hepatic leukemia factor                                           | NM_002126    | 2.47  | 0.683 | 1.484 | 0.947 | 2.098 | 0.991 | Regulation of transcription, DNA-dependent. Transcription from RNA polymerase II promoter. Development.                 |
| ACHE     | acetylcholinesterase isoform E4-E5 precursor                      | NM_015831    | 2.1   | 0.922 | 2.239 | 0.943 | 1.712 | 0.698 | Acetylcholine catabolism in synaptic cleft. DNA replication. Cell adhesion. Synaptogenesis. Muscle development.         |
| FOXP4    | forkhead box N4                                                   | NM_213596    | 2.835 | 0.865 | 1.591 | 0.525 | 1.612 | 0.582 | Transcription. Regulation of transcription, DNA-dependent.                                                              |
| N/A      | N/A                                                               | AK096323     | 2.62  | 0.758 | 1.217 | 0.641 | 2.2   | 0.537 | Protein amino acid phosphorylation. Signal transduction. Alcohol metabolism. Lipid metabolism.                          |
| POU2F3   | POU transcription factor                                          | NM_014352    | 1.987 | 0.798 | 1.782 | 0.683 | 2.263 | 0.803 | Regulation of transcription from RNA polymerase II promoter. Epidermis development.                                     |
| ITGB2    | * integrin beta chain, beta 2 precursor* * macrophage antigen     | NM_000211    | 2.159 | 0.733 | 1.281 | 0.73  | 2.587 | 0.546 | Apoptosis. Inflammatory response. Leukocyte cell adhesion. Cell-matrix adhesion. Integrin-mediated signaling pathway.   |
| N/A      | N/A                                                               | AK096196     | 2.624 | 1.063 | 1.648 | 0.532 | 1.735 | 0.625 |                                                                                                                         |
| KIF5A    | kinesin family member 5A                                          | NM_004984    | 2.673 | 0.592 | 1.212 | 0.384 | 2.122 | 0.497 | Electron transport. Microtubule-based movement. Synaptic transmission.                                                  |
| GABRA4   | * gamma-aminobutyric acid A receptor, alpha 4 precursor*          | NM_000809    | 3.226 | 0.625 | 1.53  | 0.486 | 1.247 | 0.669 | Ion transport. Chloride transport. Gamma-aminobutyric acid signaling pathway.                                           |
| N/A      | N/A                                                               | AK097430     | 2.295 | 0.923 | 1.693 | 0.68  | 2.008 | 0.905 |                                                                                                                         |
| N/A      | N/A                                                               | AK091698     | 1.724 | 0.564 | 2.071 | 0.54  | 2.19  | 1.009 |                                                                                                                         |
| N/A      | N/A                                                               | AK096088     | 2.043 | 0.494 | 1.63  | 0.841 | 2.309 | 0.589 | Phosphate metabolism. Ion transport. Sodium ion transport. Phosphate transport. Fluid secretion.                        |
| EVA1     | epithelial V-like antigen 1 precursor                             | NM_005797    | 2.173 | 0.544 | 1.386 | 0.454 | 2.418 | 0.331 | Cell adhesion. Homophilic cell adhesion. Morphogenesis.                                                                 |
| MYOD1    | myogenic factor 3                                                 | NM_002478    | 1.079 | 0.739 | 2.291 | 0.493 | 2.599 | 0.837 | Regulation of transcription, DNA-dependent.                                                                             |
| FLJ42875 | FLJ42875 protein                                                  | NM_001004337 | 3.019 | 0.738 | 1.228 | 0.445 | 1.721 | 0.609 |                                                                                                                         |
| PTGIS    | prostaglandin I2 (prostacyclin) synthase                          | NM_000961    | 2.105 | 0.643 | 1.47  | 0.633 | 2.374 | 0.902 | Prostaglandin biosynthesis. Electron transport. Lipid metabolism. Fatty acid biosynthesis.                              |

|                |                                                                      |              |       |       |       |       |       |       |                                                                                                                              |
|----------------|----------------------------------------------------------------------|--------------|-------|-------|-------|-------|-------|-------|------------------------------------------------------------------------------------------------------------------------------|
| HOXC4          | homeo box C4                                                         | NM_014620    | 3.217 | 0.493 | 1.265 | 0.5   | 1.462 | 0.747 | Regulation of transcription, DNA-dependent. Development.                                                                     |
| NMNAT2         | nicotinamide mononucleotide adenyltransferase 2 isoform 1            | NM_015039    | 2.558 | 1.151 | 1.653 | 1.085 | 1.732 | 0.995 | Phospholipid biosynthesis. Biosynthesis. NAD biosynthesis.                                                                   |
| N/A            | N/A                                                                  | AK098068     | 1.86  | 0.837 | 1.853 | 0.608 | 2.227 | 0.862 |                                                                                                                              |
| HEY2           | hairly/enhancer-of-split related with YRPW motif 2                   | NM_012259    | 3.145 | 1.069 | 1.497 | 0.956 | 1.296 | 0.979 | Regulation of transcription, DNA-dependent. Neurogenesis.                                                                    |
| TBX20          | T-box transcription factor TBX20                                     | NM_020417    | 2.978 | 0.668 | 1.196 | 0.707 | 1.76  | 0.661 |                                                                                                                              |
| PAX4           | paired box gene 4                                                    | NM_006193    | 2.081 | 0.826 | 1.374 | 0.431 | 2.474 | 0.471 | Regulation of transcription, DNA-dependent. Organogenesis. Cell differentiation.                                             |
| N/A            | N/A                                                                  | AK125823     | 2.197 | 0.489 | 1.489 | 0.596 | 2.23  | 0.443 |                                                                                                                              |
| SOX14          | SRY-box 14                                                           | NM_004189    | 1.517 | 0.628 | 1.919 | 0.642 | 2.477 | 0.55  | Transcription. Regulation of transcription, DNA-dependent. Neurogenesis.                                                     |
| N/A            | EG-VEGF                                                              | AY358683     | 2.311 | 0.646 | 1.046 | 0.546 | 2.548 | 0.433 | Regulation of cell cycle. Cell proliferation.                                                                                |
| LOC283514      | LOC283514 protein                                                    | BC041372     | 1.814 | 0.747 | 1.328 | 0.774 | 2.754 | 0.945 |                                                                                                                              |
| HOXC13         | homeo box C13                                                        | NM_017410    | 2.018 | 0.849 | 1.465 | 0.394 | 2.413 | 0.616 | Regulation of transcription, DNA-dependent. Morphogenesis.                                                                   |
| HBM            | hemoglobin mu chain                                                  | NM_001003938 | 1.526 | 0.351 | 2.508 | 0.487 | 1.85  | 0.477 | Transport. Oxygen transport.                                                                                                 |
| N/A            | N/A                                                                  | AK129645     | 3.371 | 0.245 | 1.21  | 0.414 | 1.299 | 0.512 |                                                                                                                              |
| GJB2           | * gap junction protein, beta 2, 26kDa (connexin 26)*                 | NM_004004    | 2.918 | 1.203 | 1.635 | 0.685 | 1.325 | 0.848 | Transport. Cell-cell signaling. Perception of sound.                                                                         |
| NPAS3          | neuronal PAS domain protein 3                                        | NM_022123    | 3.26  | 0.994 | 1.082 | 0.517 | 1.535 | 0.687 | Transcription. Regulation of transcription, DNA-dependent. Signal transduction.                                              |
| ACOXL          | ACOXL protein                                                        | BC022268     | 2.143 | 0.461 | 1.541 | 0.443 | 2.193 | 0.508 |                                                                                                                              |
| VIAAT          | vesicular inhibitory amino acid transporter                          | NM_080552    | 2.281 | 0.573 | 1.439 | 0.896 | 2.15  | 0.974 | Neurotransmitter transport. Amino acid transport.                                                                            |
| LAD1           | ladinin 1                                                            | NM_005558    | 2.001 | 0.492 | 1.865 | 0.563 | 2.003 | 0.733 |                                                                                                                              |
| POU4F2         | * POU domain, class 4, transcription factor 2*                       | NM_004575    | 1.849 | 0.573 | 1.827 | 0.526 | 2.187 | 0.705 | Negative regulation of transcription from RNA polymerase II promoter. Eye morphogenesis. Neurogenesis.                       |
| METH2          | METH2 protein                                                        | AF060153     | 2.805 | 0.641 | 1.035 | 0.636 | 2.023 | 0.615 | Proteolysis and peptidolysis. Negative regulation of cell proliferation.                                                     |
| SP8            | Sp8 transcription factor isoform 2                                   | NM_198956    | 2.309 | 0.615 | 1.154 | 0.724 | 2.396 | 0.635 |                                                                                                                              |
| PKD2L1         | polycystic kidney disease 2-like 1                                   | NM_016112    | 1.416 | 0.878 | 2.152 | 0.396 | 2.288 | 0.541 | Cation transport. Cation transport. Signal transduction.                                                                     |
| SPOCK2         | * sparco/osteonectin, cwcv and kazal-like domains proteoglycan       | NM_014767    | 2.681 | 0.898 | 1.173 | 1.301 | 2     | 0.56  | Synaptogenesis. Extracellular matrix organization and biogenesis. Regulation of cell differentiation.                        |
| DKFZp686L1857  | hypothetical protein cDNA DKFZp686L1857 (from clone DKFZ: BX538158)  |              | 2.862 | 0.592 | 1.126 | 0.617 | 1.858 | 0.358 | Neurotransmitter transport. Intracellular protein transport.                                                                 |
| FLJ42220       | FLJ42220 protein                                                     | NM_207441    | 2.396 | 0.625 | 1.386 | 0.691 | 2.061 | 0.738 |                                                                                                                              |
| PROK2          | prokinectin 2                                                        | NM_021935    | 2.661 | 1.221 | 1.141 | 0.556 | 2.039 | 1.07  | Activation of MAPK. Angiogenesis. Anti-apoptosis. Chemotaxis. Inflammatory response.                                         |
| PLA2G7         | * phospholipase A2, group VII*                                       | NM_005084    | 2.222 | 0.611 | 1.802 | 0.754 | 1.811 | 0.643 | Inflammatory response. Lipid catabolism.                                                                                     |
| PKP1           | plakophilin 1 isoform 1b                                             | NM_000299    | 1.803 | 0.48  | 1.527 | 0.715 | 2.503 | 0.595 | Cell adhesion. Signal transduction. Cell-cell signaling.                                                                     |
| INSM1          | insulinoma-associated 1                                              | NM_002196    | 2.394 | 0.772 | 1.79  | 0.872 | 1.646 | 0.603 | Transcription. Regulation of transcription, DNA-dependent.                                                                   |
| N/A            | N/A                                                                  | AK091777     | 2.699 | 0.878 | 1.478 | 0.588 | 1.639 | 0.639 | ATP-dependent proteolysis. Protein ubiquitination.                                                                           |
| TBC1D1         | * TBC1 (tre-2/USP6, BUB2, cdc16) domain family, member 1*            | NM_015173    | 2.153 | 0.766 | 1.717 | 0.616 | 1.943 | 0.717 |                                                                                                                              |
| GAD1           | glutamate decarboxylase 1 isoform GAD67                              | NM_000817    | 2.66  | 0.309 | 1.44  | 0.317 | 1.713 | 0.536 | Amino acid metabolism. Glutamate decarboxylation to succinate. Synaptic transmission. Protein-pyridoxal-5-phosphate linkage. |
| N/A            | N/A                                                                  | AK126839     | 1.679 | 0.75  | 1.999 | 1.102 | 2.134 | 1.055 |                                                                                                                              |
| KCNAB1         | * potassium voltage-gated channel, shaker-related subfamily, I       | NM_172159    | 2.187 | 0.693 | 1.577 | 0.751 | 2.047 | 0.59  | Ion transport. Potassium ion transport. Potassium ion transport.                                                             |
| PHOX2A         | paired-like homeobox 2a                                              | NM_005169    | 1.765 | 0.454 | 2.1   | 0.744 | 1.945 | 0.868 | Regulation of transcription, DNA-dependent. Neurotransmitter metabolism.                                                     |
| NPPC           | natriuretic peptide precursor C                                      | NM_024409    | 1.817 | 0.666 | 2.002 | 0.579 | 1.988 | 0.625 | Regulation of blood pressure. Regulation of vasoconstriction.                                                                |
| LRAT           | lecithin:retinol acyltransferase isoform 1                           | AY546085     | 2.265 | 0.59  | 1.498 | 0.574 | 2.037 | 0.629 | Sensory perception. Visual perception.                                                                                       |
| N/A            | forkhead homolog                                                     | L12142       | 2.665 | 0.564 | 1.597 | 0.617 | 1.535 | 0.578 |                                                                                                                              |
| FLJ10052       | hypothetical protein FLJ10052                                        | NM_017982    | 2.355 | 1.062 | 1.824 | 0.748 | 1.613 | 0.597 |                                                                                                                              |
| SYT6           | synaptotagmin VI                                                     | NM_205848    | 1.871 | 0.695 | 1.915 | 0.487 | 2.003 | 0.52  | Transport.                                                                                                                   |
| CDO1           | * cysteine dioxygenase, type I*                                      | NM_001801    | 2.206 | 0.748 | 1.921 | 0.82  | 1.656 | 0.522 | L-cysteine metabolism.                                                                                                       |
| HOXC5          | homeo box C5                                                         | NM_018953    | 2.469 | 0.5   | 1.022 | 0.33  | 2.291 | 0.423 | Regulation of transcription from RNA polymerase II promoter. Development.                                                    |
| N/A            | hepatocyte growth factor-like protein homolog                        | U28055       | 1.606 | 0.353 | 1.614 | 0.251 | 2.558 | 0.29  | Proteolysis and peptidolysis. Negative regulation of blood coagulation.                                                      |
| CCK            | cholecystokinin preproprotein                                        | NM_000729    | 1.621 | 1.151 | 1.755 | 0.422 | 2.394 | 0.451 | Signal transduction.                                                                                                         |
| HRLP5          | HRLP5 protein                                                        | BC034222     | 2.888 | 0.979 | 1.408 | 0.724 | 1.473 | 0.809 |                                                                                                                              |
| KCNQ4          | potassium voltage-gated channel KQT-like protein 4 isoform a         | NM_004700    | 2.432 | 0.735 | 1.904 | 0.682 | 1.43  | 0.52  | Cation transport. Potassium ion transport. Perception of sound.                                                              |
| FLJ00220       | FLJ00220 protein                                                     | AK074147     | 1.959 | 1.014 | 1.441 | 0.695 | 2.366 | 1.238 | Skeletal development. Development.                                                                                           |
| MCTP1          | multiple C2-domains with two transmembrane regions 1 isoform         | NM_024717    | 2.568 | 0.807 | 1.651 | 0.847 | 1.545 | 0.72  |                                                                                                                              |
| TNK1           | * tyrosine kinase, non-receptor, 1*                                  | NM_003985    | 1.726 | 1.395 | 1.437 | 0.485 | 2.599 | 0.578 | Autophosphorylation.                                                                                                         |
| DKFZp686P24273 | hypothetical protein cDNA DKFZp686P24273 (from clone DKFZ: BX538083) |              | 2.339 | 0.276 | 1.23  | 0.264 | 2.19  | 0.622 |                                                                                                                              |
| SIX2           | SIX2                                                                 | AF332197     | 2.572 | 0.828 | 1.64  | 0.763 | 1.542 | 0.916 | Regulation of transcription, DNA-dependent. Transcription from RNA polymerase II promoter. Morphogenesis.                    |
| N/A            | N/A                                                                  | AK093202     | 2.271 | 0.357 | 1.464 | 0.235 | 2.016 | 0.29  |                                                                                                                              |
| CLIC6          | chloride channel form B alternatively spliced.                       | AF448439     | 1.968 | 0.837 | 1.641 | 0.407 | 2.135 | 0.693 | Ion transport. Chloride transport.                                                                                           |
| N/A            | N/A                                                                  | AK123969     | 1.818 | 0.923 | 1.492 | 0.569 | 2.432 | 0.773 | Carbohydrate metabolism. Glycogen metabolism. Signal transduction.                                                           |
| FLJ33655       | hypothetical protein FLJ33655                                        | BC067734     | 1.429 | 0.608 | 1.939 | 0.501 | 2.373 | 0.631 |                                                                                                                              |
| RDH13          | retinol dehydrogenase 13 (all-trans and 9-cis)                       | NM_138412    | 1.673 | 1.235 | 1.566 | 1.318 | 2.299 | 1.339 | Metabolism.                                                                                                                  |

|           |                                                                |              |       |       |       |       |       |       |       |       |                                                                                                                            |
|-----------|----------------------------------------------------------------|--------------|-------|-------|-------|-------|-------|-------|-------|-------|----------------------------------------------------------------------------------------------------------------------------|
| ROPN1     | AKAP-binding sperm protein ropporin                            | NM_017578    |       |       | 2.587 | 0.556 | 1.022 | 0.406 | 2.128 | 0.921 | Cytokinesis. Signal transduction. Rho protein signal transduction. Spermatogenesis. Acrosome reaction.                     |
| KCNK10    | * potassium channel, subfamily K, member 10 isoform 1*         | NM_021161    |       |       | 2.214 | 0.86  | 1.422 | 0.754 | 2.101 | 0.694 | Ion transport. Potassium ion transport. Signal transduction.                                                               |
| N/A       | MU-MB-20.220                                                   | AY130010     |       |       | 2.545 | 0.929 | 1.66  | 0.493 | 1.528 | 0.926 | Transcription. Regulation of transcription, DNA-dependent.                                                                 |
| VAX2      | ventral anterior homeobox 2                                    | NM_012476    |       |       | 2.471 | 0.959 | 1.133 | 0.66  | 2.118 | 1.046 | Regulation of transcription, DNA-dependent. Transcription from RNA polymerase II promoter. Ectoderm development.           |
| DUOX2     | dual oxidase 2 precursor                                       | NM_014080    |       |       | 1.46  | 0.58  | 2.143 | 0.437 | 2.113 | 0.598 | Electron transport. Superoxide release. Hydrogen peroxide biosynthesis.                                                    |
| ZDHHC22   | * zinc finger, DHHC domain containing 22"                      | NM_174976    |       |       | 1.901 | 0.861 | 1.693 | 0.725 | 2.118 | 0.635 |                                                                                                                            |
| KIAA1963  | KIAA1963 protein                                               | AB075843     |       |       | 2.093 | 0.997 | 1.988 | 0.654 | 1.629 | 0.557 |                                                                                                                            |
| BHMT      | betaine-homocysteine methyltransferase                         | BC012616     |       |       | 1.802 | 0.335 | 1.734 | 0.392 | 2.171 | 0.437 | Protein amino acid methylation. Regulation of homocysteine metabolism.                                                     |
| INSRR     | insulin receptor-related receptor precursor                    | NM_014215    |       |       | 1.904 | 0.528 | 2.04  | 0.37  | 1.761 | 0.485 | Protein amino acid phosphorylation. Transmembrane receptor protein tyrosine kinase signaling pathway.                      |
| CXCR4     | chemokine receptor CXCR4-Lo                                    | AF147204     |       |       | 2.166 | 0.463 | 1.77  | 0.531 | 1.768 | 0.771 | Signal transduction. G-protein coupled receptor protein signaling pathway.                                                 |
| ZNFN1A3   | * zinc finger protein, subfamily 1A, 3 (Aiolos) isoform 1*     | NM_012481    | 1.421 | 1.186 | 3.152 | 0.581 | 1.382 | 0.701 | 1.168 | 0.291 |                                                                                                                            |
| THPO      | thrombopoietin isoform 1 precursor                             | NM_000460    |       |       | 1.743 | 1.053 | 1.628 | 0.602 | 2.326 | 0.716 | Development. Cell proliferation.                                                                                           |
| N/A       | N/A                                                            | AK126633     |       |       | 1.133 | 0.865 | 2.147 | 0.353 | 2.411 | 0.513 |                                                                                                                            |
| MTE       | MTE                                                            | AF348997     |       |       | 2.388 | 0.433 | 1.163 | 0.491 | 2.138 | 0.376 |                                                                                                                            |
| TRAD      | serine/threonine kinase with Dbl- and pleckstrin homology dom  | NM_007064    |       |       | 2.563 | 1.09  | 1.541 | 0.398 | 1.572 | 0.658 |                                                                                                                            |
| FLJ23191  | hypothetical protein FLJ23191                                  | NM_024574    |       |       | 2.862 | 0.769 | 1.116 | 0.818 | 1.696 | 0.748 |                                                                                                                            |
| HOXC6     | homeo box C6 isoform 2                                         | NM_153693    | 1.042 | 1.323 | 2.971 | 0.65  | 1.39  | 0.539 | 1.311 | 0.761 | Regulation of transcription from RNA polymerase II promoter. Development.                                                  |
| FOXD4L2   | FOXD4-like 2                                                   | NM_199135    |       |       | 2.264 | 0.39  | 1.347 | 0.244 | 2.046 | 0.178 | Transcription. Regulation of transcription, DNA-dependent.                                                                 |
| HBA2      | HBA2 protein                                                   | BC005931     | 1.538 | 1.572 | 1.62  | 0.399 | 1.81  | 0.351 | 2.225 | 0.512 | Transport. Oxygen transport.                                                                                               |
| LHX8      | LIM homeobox 8                                                 | NM_001001933 |       |       | 1.398 | 0.515 | 1.644 | 0.852 | 2.609 | 0.424 |                                                                                                                            |
| IHH       | IHH protein                                                    | BC034757     |       |       | 1.51  | 0.573 | 2.138 | 1.291 | 1.99  | 1.046 | Proteolysis and peptidolysis. Cell-cell signaling. Development. Intein-mediated protein splicing.                          |
| FAM43B    | * family with sequence similarity 43, member B*                | NM_207334    |       |       | 1.742 | 0.633 | 1.644 | 0.551 | 2.246 | 0.616 |                                                                                                                            |
| FOXD4b    | forkhead box protein D4b                                       | NM_199244    |       |       | 2.335 | 0.45  | 1.32  | 0.42  | 1.976 | 0.246 | Regulation of transcription, DNA-dependent.                                                                                |
| CX36      | connexin-36                                                    | NM_020660    |       |       | 1.984 | 0.721 | 1.801 | 0.401 | 1.842 | 0.774 | Cell communication.                                                                                                        |
| SLC7A10   | * solute carrier family 7, member 10"                          | NM_019849    |       |       | 1.571 | 0.628 | 2.225 | 0.7   | 1.83  | 0.468 | Transport. Neutral amino acid transport.                                                                                   |
| IL12RB2   | * interleukin 12 receptor, beta 2 precursor"                   | NM_001559    |       |       | 1.484 | 0.218 | 1.958 | 0.844 | 2.182 | 1.269 | Cell surface receptor linked signal transduction. Positive regulation of cell proliferation.                               |
| GPR49     | G protein-coupled receptor 49                                  | NM_003667    |       |       | 2.644 | 0.544 | 1.36  | 0.314 | 1.616 | 0.314 | Signal transduction. G-protein coupled receptor protein signaling pathway.                                                 |
| GHSR      | growth hormone secretagogue receptor isoform 1a                | NM_198407    |       |       | 1.527 | 0.502 | 1.609 | 0.342 | 2.484 | 0.42  | Signal transduction. G-protein coupled receptor protein signaling pathway.                                                 |
| POU3F2    | * POU domain, class 3, transcription factor 2"                 | NM_005604    | 1.444 | 0.876 | 2.771 | 0.716 | 1.829 | 0.698 | 1.019 | 0.63  | Regulation of transcription, DNA-dependent.                                                                                |
| RXRG      | * retinoid X receptor, gamma"                                  | NM_006917    |       |       | 2.038 | 0.516 | 1.491 | 0.317 | 2.085 | 0.359 | Transcription. Regulation of transcription, DNA-dependent.                                                                 |
| LRRN6D    | leucine rich repeat neuronal 6D                                | NM_001004432 |       |       | 1.933 | 0.418 | 1.185 | 0.459 | 2.495 | 0.452 |                                                                                                                            |
| KIAA0473  | KIAA0473 protein                                               | AB007942     |       |       | 1.86  | 0.291 | 1.345 | 0.425 | 2.403 | 0.619 | Protein folding. Protein amino acid dephosphorylation. Cell cycle. Negative regulation of cell cycle.                      |
| FOXD3     | forkhead box D3                                                | NM_012183    |       |       | 2.814 | 0.451 | 1.469 | 0.469 | 1.323 | 0.384 | Negative regulation of transcription from RNA polymerase II promoter. Embryonic development (sensu Mammalia).              |
| NODAL     | nodal-related protein                                          | NM_018055    |       |       | 1.494 | 0.715 | 1.97  | 0.496 | 2.138 | 0.415 |                                                                                                                            |
| N/A       | homeodomain protein (50 AA)                                    | X52402       |       |       | 1.892 | 0.775 | 1.703 | 0.772 | 2.006 | 0.51  | Regulation of transcription from RNA polymerase II promoter. Development.                                                  |
| FOXD4L1   | forkhead box D4-like 1                                         | NM_012184    |       |       | 2.25  | 0.275 | 1.37  | 0.318 | 1.98  | 0.304 | Transcription. Regulation of transcription, DNA-dependent.                                                                 |
| ICSBP1    | interferon consensus sequence binding protein 1                | NM_002163    |       |       | 2.815 | 0.639 | 1.2   | 0.436 | 1.58  | 0.448 | Negative regulation of transcription from RNA polymerase II promoter. DNA-dependent. Immune response.                      |
| ADMP      | ADMP                                                           | NM_145035    |       |       | 3.036 | 0.673 | 1.022 | 0.384 | 1.533 | 0.782 |                                                                                                                            |
| TNNT1     | TNNT1 protein                                                  | BC022086     |       |       | 2.027 | 0.787 | 1.463 | 0.331 | 2.096 | 0.637 | Regulation of muscle contraction. Muscle development.                                                                      |
| KAL1      | Kallmann syndrome 1 protein                                    | NM_000216    |       |       | 1.442 | 0.653 | 1.405 | 0.696 | 2.732 | 1.12  | Cell motility. Chemotaxis. Cell adhesion. Axon guidance.                                                                   |
| NXP2      | neurexophilin 2                                                | NM_007226    |       |       | 2.016 | 1.138 | 1.582 | 0.782 | 1.98  | 1.526 | Neuropeptide signaling pathway.                                                                                            |
| OTP       | orthopectia                                                    | NM_032109    |       |       | 2.698 | 0.491 | 1.36  | 0.519 | 1.516 | 0.469 | Regulation of transcription, DNA-dependent. Development.                                                                   |
| RGMA      | * RGM domain family, member A*                                 | NM_020211    |       |       | 2.033 | 0.562 | 2.07  | 1.095 | 1.468 | 0.775 |                                                                                                                            |
| SHH       | sonic hedgehog preproprotein                                   | NM_000193    |       |       | 2.393 | 0.387 | 1.531 | 0.602 | 1.638 | 0.577 | Proteolysis and peptidolysis. Cell-cell signaling. Development. Ventral midline development. Mesoderm cell fate dete.      |
| SLITRK3   | slit and trk like 3 protein                                    | NM_014926    |       |       | 2.516 | 0.661 | 1.446 | 0.408 | 1.597 | 0.361 |                                                                                                                            |
| TNFRSF11A | * tumor necrosis factor receptor superfamily, member 11a prec  | NM_003839    |       |       | 2.719 | 0.647 | 1.425 | 0.367 | 1.411 | 0.463 | Immune response. Signal transduction. Cell-cell signaling. Perception of sound. Positive regulation of cell proliferation. |
| WNT1      | * wingless-type MMTV integration site family, member 1 precu   | NM_005430    |       |       | 1.486 | 0.706 | 1.971 | 0.284 | 2.097 | 0.444 | Frizzled-2 signaling pathway. Spermatogenesis. Central nervous system development. Morphogenesis.                          |
| SIAT8D    | sialyltransferase 8D isoform a                                 | NM_005668    |       |       | 2.389 | 0.799 | 1.788 | 0.874 | 1.377 | 0.718 | Protein amino acid glycosylation. N-glycan processing. Neurogenesis. Oligosaccharide metabolism.                           |
| TNFRSF8   | * tumor necrosis factor receptor superfamily, member 8 isoform | NM_001243    |       |       | 1.441 | 0.298 | 2.158 | 0.46  | 1.954 | 0.526 | Signal transduction. Negative regulation of cell proliferation.                                                            |
| soxB      | N/A                                                            | X71137       |       |       | 1.958 | 0.879 | 1.934 | 0.836 | 1.661 | 0.625 |                                                                                                                            |
| N/A       | N/A                                                            | AK056317     |       |       | 1.975 | 0.636 | 1.458 | 0.473 | 2.118 | 0.732 | Proteolysis and peptidolysis. Proteolysis and peptidolysis. Development.                                                   |
| UCP1      | uncoupling protein 1                                           | NM_021833    | 1.303 | 1.168 | 2.638 | 0.504 | 1.421 | 0.356 | 1.486 | 0.644 | Generation of precursor metabolites and energy. Transport. Mitochondrial transport. Proton transport.                      |
| MTM       | metallothionein M                                              | NM_175620    |       |       | 1.945 | 0.634 | 1.438 | 0.38  | 2.146 | 0.541 |                                                                                                                            |
| FOXE3     | forkhead box E3                                                | NM_012186    |       |       | 1.769 | 0.317 | 1.638 | 0.623 | 2.122 | 0.684 | Transcription. Regulation of transcription, DNA-dependent. Development.                                                    |
| KIAA1914  | KIAA1914 protein isoform 1                                     | NM_001001936 |       |       | 2.485 | 0.832 | 1.248 | 0.354 | 1.775 | 0.906 |                                                                                                                            |
| SLC5A5    | * solute carrier family 5 (sodium iodide symporter), member 5" | NM_000453    |       |       | 1.899 | 0.701 | 1.645 | 0.783 | 1.962 | 0.596 | Ion transport. Sodium ion transport.                                                                                       |

|             |                                                                    |           |       |       |       |       |       |       |                                                                                                             |
|-------------|--------------------------------------------------------------------|-----------|-------|-------|-------|-------|-------|-------|-------------------------------------------------------------------------------------------------------------|
| SP5         | SP5 protein                                                        | BC069026  | 1.987 | 0.725 | 1.836 | 0.309 | 1.679 | 0.509 |                                                                                                             |
| MAP6        | microtubule-associated protein 6 isoform 2                         | NM_207577 | 2.418 | 0.697 | 1.554 | 0.46  | 1.524 | 0.505 |                                                                                                             |
| SLC6A4      | solute carrier family 6 member 4                                   | NM_001045 | 2.986 | 0.674 | 1.232 | 0.772 | 1.272 | 0.36  | Neurotransmitter uptake. Serotonin transport.                                                               |
| CDH3        | * cadherin 3, type 1, preproprotein*                               | BC041846  | 2.076 | 0.382 | 1.504 | 0.67  | 1.906 | 0.441 | Cell adhesion. Homophilic cell adhesion. Sensory perception. Visual perception.                             |
| ONECUT2     | * one cut domain, family member 2"                                 | NM_004852 | 2.259 | 1.008 | 1.32  | 0.624 | 1.901 | 0.876 | Regulation of transcription, DNA-dependent. Organogenesis.                                                  |
| ARHGEF7     | Rho guanine nucleotide exchange factor 7 isoform b                 | NM_145735 | 2.828 | 0.577 | 1.295 | 0.48  | 1.351 | 0.827 | Signal transduction.                                                                                        |
| FLJ46156    | FLJ46156 protein                                                   | NM_198499 | 2.569 | 0.713 | 1.479 | 0.555 | 1.424 | 0.623 |                                                                                                             |
| RFXDC1      | regulatory factor X domain containing 1                            | NM_173560 | 1.706 | 0.486 | 1.501 | 0.491 | 2.264 | 0.618 |                                                                                                             |
| ONECUT1     | * one cut domain, family member 1"                                 | NM_004498 | 2.332 | 0.661 | 1.3   | 0.628 | 1.839 | 0.517 | Regulation of transcription, DNA-dependent.                                                                 |
| PUNC        | putative neuronal cell adhesion molecule                           | NM_004884 | 2.209 | 1.037 | 1.318 | 0.939 | 1.941 | 0.94  |                                                                                                             |
| TCF15       | TCF15 protein                                                      | BC067836  | 2.233 | 1.313 | 1.366 | 0.614 | 1.862 | 1.121 | Regulation of transcription from RNA polymerase II promoter. Mesoderm development.                          |
| N/A         | N/A                                                                | AK056896  | 1.987 | 0.84  | 1.334 | 0.571 | 2.14  | 0.662 |                                                                                                             |
| RNF39       | HZFW1 protein isoform 1                                            | NM_025236 | 2.421 | 0.348 | 1.462 | 0.52  | 1.577 | 0.478 | Protein ubiquitination.                                                                                     |
| GSH1        | homeobox protein Gsh-1                                             | NM_145657 | 2.199 | 0.77  | 1.386 | 0.5   | 1.862 | 0.622 | Regulation of transcription, DNA-dependent. Development.                                                    |
| KIAA1916    | KIAA1916 protein                                                   | AB067503  | 1.544 | 0.742 | 1.862 | 0.378 | 2.035 | 0.635 |                                                                                                             |
| N/A         | N/A                                                                | AK124544  | 3.238 | 0.768 |       |       | 2.198 | 0.423 |                                                                                                             |
| KIAA1247    | KIAA1247 protein                                                   | AB033073  | 1.798 | 0.487 | 1.826 | 0.393 | 1.809 | 0.655 | Amino acid metabolism. Metabolism. Heparan sulfate proteoglycan metabolism.                                 |
| SLC10A4     | * solute carrier family 10 (sodium/bile acid cotransporter family) | NM_152679 | 3.066 | 0.644 |       |       | 2.365 | 0.749 | Sodium ion transport.                                                                                       |
| C20orf127   | chromosome 20 open reading frame 127                               | NM_080757 | 2.048 | 0.734 | 1.33  | 0.673 | 2.052 | 0.748 |                                                                                                             |
| WNT3A       | * wingless-type MMTV integration site family, member 3A"           | NM_033131 | 2.044 | 0.728 | 1.586 | 0.462 | 1.797 | 0.645 |                                                                                                             |
| MGC35555    | hypothetical protein MGC35555                                      | NM_178565 | 2.55  | 0.434 | 1.467 | 0.594 | 1.405 | 0.703 |                                                                                                             |
| N/A         | MSTP061                                                            | AF117225  | 1.722 | 0.671 | 1.625 | 0.598 | 2.069 | 0.795 |                                                                                                             |
| CG-6        | brain protein                                                      | AF155065  | 2.633 | 0.593 | 1.263 | 0.639 | 1.513 | 0.787 |                                                                                                             |
| N/A         | N/A                                                                | AK126846  | 1.851 | 0.598 | 1.352 | 0.518 | 2.204 | 0.425 | Signal transduction. Transmembrane receptor protein tyrosine kinase signaling pathway. Neurogenesis.        |
| MCF2L2      | Rho family guanine-nucleotide exchange factor                      | NM_015078 | 2.417 | 0.448 | 1.712 | 0.324 | 1.275 | 0.484 |                                                                                                             |
| LOC126248   | hypothetical protein LOC126248                                     | NM_173479 | 2.145 | 0.223 | 1.856 | 0.272 | 1.401 | 0.192 |                                                                                                             |
| N/A         | N/A                                                                | AK125200  | 1.58  | 0.23  | 1.894 | 0.693 | 1.925 | 0.425 |                                                                                                             |
| PTH2        | phosphatase and tensin homolog 2                                   | AF019083  | 3.149 | 0.458 | 1.028 | 0.346 | 1.213 | 0.69  | Protein amino acid dephosphorylation. Cell cycle. Negative regulation of cell cycle.                        |
| SSTR2       | somatostatin receptor 2                                            | NM_001050 | 2.167 | 0.642 | 1.311 | 0.478 | 1.907 | 0.717 | Protein amino acid phosphorylation. Signal transduction. Alcohol metabolism. Lipid metabolism. Metabolism.  |
| GRIN2C      | N-methyl-D-aspartate receptor subunit 2C precursor                 | NM_000835 | 1.138 | 0.495 | 2.373 | 0.642 | 1.871 | 0.779 | Ion transport. Glutamate signaling pathway. Synaptic transmission.                                          |
| DMRT1       | doublesex and mab-3 related transcription factor 1                 | NM_021951 | 2.065 | 0.593 | 1.349 | 0.591 | 1.967 | 0.451 | Regulation of transcription, DNA-dependent. Sex determination. Sex differentiation. Male gonad development. |
| PTPRZ1      | * protein tyrosine phosphatase, receptor-type, Z polypeptide 1     | NM_002851 | 2.832 | 1.031 | 1.197 | 0.715 | 1.349 | 0.919 | Protein amino acid dephosphorylation. One-carbon compound metabolism. Central nervous system development.   |
| LOC349136   | LOC349136 protein                                                  | BC047921  | 1.53  | 0.738 | 2.018 | 0.621 | 1.821 | 0.834 | Electron transport.                                                                                         |
| GAL         | galanin preproprotein                                              | NM_015973 | 1.457 | 1.05  | 1.732 | 0.74  | 2.172 | 0.868 | Smooth muscle contraction. Neuropeptide signaling pathway. Insulin secretion. Growth hormone secretion.     |
| FLJ44815    | FLJ44815 protein                                                   | NM_207454 | 1.451 | 0.86  | 1.867 | 0.673 | 2.041 | 0.629 |                                                                                                             |
| FBXO39      | F-box protein 39                                                   | NM_153230 | 1.834 | 0.874 | 1.477 | 0.437 | 2.047 | 0.681 |                                                                                                             |
| B4GalNac-T3 | * beta 1,4-N-acetylgalactosaminyltransferase-transferase-III"      | NM_173593 | 2.217 | 0.858 | 1.277 | 0.432 | 1.862 | 0.978 |                                                                                                             |
| N/A         | N/A                                                                | AK124198  | 1.215 | 0.921 | 2.286 | 0.674 | 1.85  | 0.468 |                                                                                                             |
| R-spondin   | hypothetical protein FLJ40906                                      | NM_173640 | 2.393 | 1.059 | 1.382 | 0.719 | 1.574 | 0.797 | Electron transport.                                                                                         |
| SOX7        | SRY-box 7                                                          | NM_031439 | 2.331 | 0.709 | 1.745 | 0.515 | 1.272 | 0.605 | Protein amino acid phosphorylation. Signal transduction. Alcohol metabolism. Lipid metabolism. Metabolism.  |
| MT1B        | metallothionein 1B                                                 | NM_005947 | 1.914 | 0.612 | 1.258 | 0.35  | 2.176 | 0.257 |                                                                                                             |
| N/A         | chordin Like                                                       | AY358522  | 2.192 | 1.065 | 1.1   | 0.524 | 2.055 | 0.881 | Cell differentiation.                                                                                       |
| N/A         | N/A                                                                | AK128329  | 1.674 | 0.678 | 1.692 | 0.713 | 1.971 | 0.65  |                                                                                                             |
| IGFBP2      | insulin-like growth factor binding protein 2 (36kD)                | NM_000597 | 1.613 | 0.828 | 1.426 | 0.894 | 2.095 | 0.844 | Regulation of cell growth.                                                                                  |
| EPN3        | epsin 3                                                            | NM_017957 | 1.808 | 0.679 | 1.296 | 0.285 | 2.229 | 0.608 |                                                                                                             |
| N/A         | Unknown (protein for IMAGE:4819956)                                | BC018035  | 1.541 | 0.718 | 1.949 | 0.569 | 1.838 | 0.889 |                                                                                                             |
| OVOL1       | OVO-like 1 binding protein                                         | NM_004561 | 1.732 | 0.37  | 1.944 | 0.473 | 1.647 | 0.478 | Regulation of transcription, DNA-dependent. Spermatogenesis.                                                |
| BIK         | BCL2-interacting killer                                            | NM_001197 | 2.234 | 0.993 | 1.494 | 0.458 | 1.592 | 0.778 |                                                                                                             |
| FOXQ1       | forkhead box Q1                                                    | NM_033260 | 2.41  | 0.545 | 1.171 | 0.305 | 1.732 | 0.534 | Regulation of transcription, DNA-dependent.                                                                 |
| LRFN5       | leucine rich repeat and fibronectin type III domain containing 5   | NM_152447 | 1.704 | 1.384 | 1.374 | 0.912 | 2.234 | 0.829 |                                                                                                             |
| N/A         | N/A                                                                | AK125333  | 1.278 | 0.548 | 1.8   | 0.497 | 2.219 | 0.481 |                                                                                                             |
| JPH3        | junctophilin 3                                                     | NM_020655 | 1.965 | 0.693 | 1.359 | 0.371 | 1.973 | 0.987 |                                                                                                             |
| CAM-KIIN    | CaM-KII inhibitory protein                                         | NM_033259 | 2.317 | 0.923 | 1.628 | 0.797 | 1.35  | 0.611 | Proteolysis and peptidolysis. Cell-cell signaling. Cell-cell signaling. Brain development.                  |
| EFGBP1      | EF hand calcium binding protein 1                                  | NM_022351 | 2.168 | 1.036 | 1.124 | 0.384 | 1.992 | 0.454 | Antibiotic biosynthesis.                                                                                    |
| N/A         | G protein-coupled receptor PGR10                                   | AY255534  | 2.239 | 0.664 | 1.411 | 0.37  | 1.612 | 0.324 |                                                                                                             |
| NEUROG3     | neurogenin 3                                                       | NM_020999 | 1.809 | 0.693 | 1.46  | 0.321 | 1.992 | 0.574 | Transcription. Central nervous system development. Peripheral nervous system development.                   |



|           |                                                                     |              |       |       |       |       |       |       |                                                                                                                   |                                                                                                                                     |
|-----------|---------------------------------------------------------------------|--------------|-------|-------|-------|-------|-------|-------|-------------------------------------------------------------------------------------------------------------------|-------------------------------------------------------------------------------------------------------------------------------------|
| C20orf86  | chromosome 20 open reading frame 86                                 | NM_080674    | 2.649 | 0.927 | 1.527 | 0.724 | 1.083 | 0.53  | Protein modification.                                                                                             |                                                                                                                                     |
| SPATS1    | * spermatogenesis associated, serine-rich 1*                        | NM_145026    | 2.172 | 0.678 | 1.327 | 0.447 | 1.756 | 0.772 |                                                                                                                   |                                                                                                                                     |
| ESX1L     | * extraembryonic, spermatogenesis, homeobox 1-like*                 | NM_153448    | 2.726 | 0.571 | 1.118 | 0.533 | 1.409 | 0.429 |                                                                                                                   |                                                                                                                                     |
| C1QTNF4   | C1q and tumor necrosis factor related protein 4                     | NM_031909    | 1.396 | 0.529 | 1.395 | 0.597 | 2.461 | 0.749 |                                                                                                                   |                                                                                                                                     |
| NOL4      | nucleolar protein 4                                                 | NM_003787    | 2.226 | 0.522 | 1.502 | 0.82  | 1.522 | 0.727 |                                                                                                                   |                                                                                                                                     |
| TBX21     | T-box 21                                                            | NM_013351    | 1.798 | 0.979 | 1.605 | 0.441 | 1.84  | 0.717 | Transcription. Regulation of transcription, DNA-dependent. Development.                                           |                                                                                                                                     |
| ASTN      | astrotaclin isoform 1                                               | NM_004319    | 3.016 | 0.387 |       |       | 2.227 | 0.515 | Cell adhesion. Neuronal cell adhesion. Cell migration.                                                            |                                                                                                                                     |
| PRPH      | peripherin                                                          | BC032703     | 1.68  | 0.428 | 1.424 | 0.375 | 2.131 | 0.304 |                                                                                                                   |                                                                                                                                     |
| GPR12     | G protein-coupled receptor 12                                       | NM_005288    | 2.12  | 1.048 | 1.632 | 0.754 | 1.481 | 0.943 | Signal transduction. G-protein coupled receptor protein signaling pathway.                                        |                                                                                                                                     |
| GPR101    | G protein-coupled receptor 101                                      | NM_054021    | 1.2   | 0.393 | 2.259 | 0.464 | 1.774 | 0.506 |                                                                                                                   |                                                                                                                                     |
| KCNA2     | * potassium voltage-gated channel, shaker-related subfamily, I      | NM_004974    | 1.264 | 0.432 | 1.868 | 0.749 | 2.1   | 0.776 | Cation transport. Potassium ion transport. Potassium ion transport.                                               |                                                                                                                                     |
| GNG4      | * guanine nucleotide binding protein (G protein), gamma 4*          | NM_004485    | 2.583 | 0.814 | 1.43  | 0.435 | 1.217 | 0.509 | Signal transduction. Regulation of G-protein coupled receptor protein signaling pathway.                          |                                                                                                                                     |
| TNL       | TRIM9-like protein TNL                                              | NM_001004342 | 2.278 | 1.198 | 1.138 | 0.693 | 1.809 | 0.897 |                                                                                                                   |                                                                                                                                     |
| C10orf71  | chromosome 10 open reading frame 71                                 | NM_199459    | 1.619 | 0.44  | 1.387 | 0.375 | 2.217 | 0.657 | Transport.                                                                                                        |                                                                                                                                     |
| MGC35308  | hypothetical protein MGC35308                                       | NM_175922    | 1.531 | 0.407 | 1.728 | 0.171 | 1.954 | 0.469 |                                                                                                                   |                                                                                                                                     |
| APOL3     | apolipoprotein L3 isoform 3                                         | NM_145641    | 2.771 | 0.429 | 1.167 | 0.548 | 1.275 | 0.502 | Lipid metabolism. Lipid transport. Acute-phase response. Development. Cholesterol metabolism.                     |                                                                                                                                     |
| NMU       | neuromedin U                                                        | NM_006681    | 2.539 | 0.519 | 1.21  | 0.586 | 1.463 | 0.325 | Regulation of smooth muscle contraction. Signal transduction. Neuropeptide signaling pathway. Digestion.          |                                                                                                                                     |
| LOC221711 | hypothetical protein LOC221711                                      | NM_194299    | 2.725 | 0.62  | 1.163 | 0.531 | 1.322 | 0.34  |                                                                                                                   |                                                                                                                                     |
| ALOX5     | arachidonate 5-lipoxygenase                                         | NM_000698    | 2.173 | 0.872 | 1.018 | 0.601 | 2.019 | 0.767 | Electron transport. Inflammatory response. Leukotriene biosynthesis.                                              |                                                                                                                                     |
| LOC90525  | hypothetical protein BC007586                                       | NM_138356    | 2.441 | 0.679 | 1.015 | 0.708 | 1.753 | 0.6   | Protein amino acid phosphorylation. Signal transduction. Alcohol metabolism. Lipid metabolism. Metabolism.        |                                                                                                                                     |
| SYT3      | synaptotagmin 3                                                     | NM_032298    | 1.008 | 0.456 | 1.078 | 0.488 | 3.122 | 0.317 | Transport.                                                                                                        |                                                                                                                                     |
| FLJ16008  | FLJ16008 protein                                                    | NM_001001665 | 2.461 | 0.625 | 1.364 | 0.81  | 1.38  | 0.764 | Protein amino acid phosphorylation. Signal transduction. Alcohol metabolism. Lipid metabolism. Metabolism.        |                                                                                                                                     |
| N/A       | unknown                                                             | AF289589     | 1.466 | 0.934 | 1.389 | 0.663 | 2.317 | 0.612 |                                                                                                                   |                                                                                                                                     |
| BSND      | barttin                                                             | NM_057176    | 1.561 | 0.724 | 1.435 | 0.652 | 2.172 | 0.359 |                                                                                                                   |                                                                                                                                     |
| DOK5      | DOK5 protein isoform a                                              | NM_018431    | 1.425 | 0.617 | 1.63  | 0.478 | 2.113 | 0.557 |                                                                                                                   |                                                                                                                                     |
| C15orf27  | chromosome 15 open reading frame 27                                 | NM_152335    | 2.899 | 0.398 | 1     | 0.563 | 1.267 | 0.474 |                                                                                                                   |                                                                                                                                     |
| PCSK2     | proprotein convertase subtilisin/kexin type 2                       | NM_002594    | 2.494 | 0.747 | 1.003 | 0.635 | 1.664 | 0.457 | Proteolysis and peptidolysis. Cell-cell signaling.                                                                |                                                                                                                                     |
| TMEM16B   | transmembrane protein 16B                                           | NM_020373    | 1.967 | 0.617 | 1.051 | 0.72  | 2.14  | 0.752 |                                                                                                                   |                                                                                                                                     |
| N/A       | Unknown (protein for MGC:71509)                                     | BC060765     | 2.692 | 0.736 | 1.305 | 0.485 | 1.151 | 0.621 | Cation transport.                                                                                                 |                                                                                                                                     |
| GPR73     | G protein-coupled receptor 73                                       | NM_138964    | 1.489 | 1     | 1.134 | 0.507 | 2.521 | 0.423 | Signal transduction. G-protein coupled receptor protein signaling pathway.                                        |                                                                                                                                     |
| ATP5G2    | * ATP synthase, H+ transporting, mitochondrial F0 complex, $\sigma$ | NM_001002031 | 2.515 | 0.697 | 1.616 | 0.535 | 1.009 | 0.523 | Ion transport. ATP synthesis coupled proton transport. Proton transport.                                          |                                                                                                                                     |
| HAMP      | hepcidin antimicrobial peptide                                      | NM_021175    | 1.801 | 0.627 | 1.558 | 0.631 | 1.781 | 0.736 | Xenobiotic metabolism. Iron ion homeostasis. Immune response. Defense response to bacteria. Response to pathogen. |                                                                                                                                     |
| PTPRO     | receptor-type protein tyrosine phosphatase O isoform a precursor    | NM_030667    | 2.035 | 0.616 | 1.284 | 0.535 | 1.818 | 0.536 | Protein amino acid dephosphorylation. Protein amino acid dephosphorylation.                                       |                                                                                                                                     |
| N/A       | Unknown (protein for MGC:75440)                                     | BC063642     | 2.318 | 0.29  |       |       | 2.817 | 0.586 |                                                                                                                   |                                                                                                                                     |
| ATP1B2    | Na+/K+ -ATPase beta 2 subunit                                       | NM_001678    | 1.95  | 0.597 | 1.322 | 0.529 | 1.851 | 0.58  | Transport. Potassium ion transport. Sodium ion transport.                                                         |                                                                                                                                     |
| SEMA6A    | semaphorin 6A1                                                      | NM_020796    | 2.216 | 0.676 | 1.296 | 0.841 | 1.604 | 0.731 | Apoptosis. Cytoskeleton organization and biogenesis. Signal transduction. Development. Neurogenesis.              |                                                                                                                                     |
| RGS6      | regulator of G-protein signalling 6                                 | NM_004296    | 2.219 | 1.071 | 1.269 | 0.684 | 1.624 | 0.958 | Intracellular signaling cascade. Regulation of G-protein coupled receptor protein signaling pathway.              |                                                                                                                                     |
| POU3F3    | * POU domain, class 3, transcription factor 3*                      | NM_006236    | 2.485 | 1.211 | 1.225 | 0.681 | 1.399 | 0.781 | Regulation of transcription, DNA-dependent. Central nervous system development.                                   |                                                                                                                                     |
| CNFN      | cornifelin                                                          | NM_032488    | 1.698 | 0.721 | 1.244 | 0.659 | 2.166 | 0.643 |                                                                                                                   |                                                                                                                                     |
| SLC30A2   | * solute carrier family 30, member 2 isoform 1*                     | NM_001004434 | 1.561 | 0.555 | 1.651 | 0.898 | 1.894 | 0.698 | Transport. Cation transport. Zinc ion transport.                                                                  |                                                                                                                                     |
| MSX2      | msh homeo box homolog 2                                             | NM_002449    | 2.881 | 1.038 |       |       | 2.221 | 1.04  | Skeletal development. Regulation of transcription, DNA-dependent. Development.                                    |                                                                                                                                     |
| NPY2R     | neuropeptide Y receptor Y2                                          | NM_000910    | 1.866 | 0.431 | 1.054 | 0.392 | 2.181 | 0.886 |                                                                                                                   |                                                                                                                                     |
| KIAA0522  | KIAA0522 protein                                                    | AB011094     | 2.226 | 0.87  | 1.37  | 1.053 | 1.502 | 0.671 |                                                                                                                   |                                                                                                                                     |
| N/A       | FGF17                                                               | AY358869     | 1.3   | 0.477 | 1.478 | 0.477 | 2.314 | 0.904 | Signal transduction. Cell-cell signaling. Neurogenesis.                                                           |                                                                                                                                     |
| SSTR3     | somatostatin receptor 3                                             | NM_001051    | 2.132 | 1.429 | 2.067 | 0.5   | 1.249 | 0.524 | 2.174                                                                                                             | G-protein signaling, coupled to cyclic nucleotide second messenger. Cell-cell signaling. Negative regulation of cell proliferation. |
| N/A       | protease serine 4 isoform B                                         | AY052783     | 1.674 | 0.746 | 1.571 | 0.345 | 1.844 | 0.659 | Proteolysis and peptidolysis. Digestion. Negative regulation of blood coagulation.                                |                                                                                                                                     |
| DSCAML1   | Down syndrome cell adhesion molecule like 1                         | NM_020693    | 1.649 | 0.864 | 1.533 | 0.38  | 1.906 | 0.52  | Cell adhesion.                                                                                                    |                                                                                                                                     |
| SYT2      | synaptotagmin II                                                    | NM_177402    | 1.582 | 0.464 | 2.003 | 0.573 | 1.502 | 0.566 |                                                                                                                   |                                                                                                                                     |
| N/A       | N/A                                                                 | AK022284     | 1.902 | 0.609 | 1.629 | 0.589 | 1.55  | 0.654 | Regulation of transcription, DNA-dependent.                                                                       |                                                                                                                                     |
| LOC401097 | LOC401097 protein                                                   | BC031660     | 2.682 | 0.499 | 1.247 | 0.397 | 1.15  | 0.847 |                                                                                                                   |                                                                                                                                     |
| C19orf4   | brain-specific membrane-anchored protein precursor                  | NM_012109    | 1.913 | 1.232 | 1.549 | 0.896 | 1.617 | 1.052 |                                                                                                                   |                                                                                                                                     |
| B3GNT5    | * beta-1,3-N-acetylglucosaminyltransferase bGNT-5*                  | NM_032047    | 2.874 | 1.076 | 1.109 | 0.782 | 1.089 | 0.671 | Protein amino acid glycosylation. Central nervous system development. Glycolipid biosynthesis.                    |                                                                                                                                     |
| LOC113828 | hypothetical protein BC011204                                       | NM_138435    | 1.766 | 0.317 | 1.167 | 0.391 | 2.134 | 0.408 |                                                                                                                   |                                                                                                                                     |
| N/A       | MCP-1 receptor                                                      | X95583       | 2.441 | 1.012 |       |       | 2.622 | 0.595 | Chemotaxis. Inflammatory response. Cellular defense response. Signal transduction.                                |                                                                                                                                     |
| CRABP1    | cellular retinoic acid binding protein 1                            | NM_004378    | 1.888 | 0.915 | 1.047 | 0.358 | 2.128 | 0.683 | Transport. Signal transduction. Development.                                                                      |                                                                                                                                     |
| C10orf48  | chromosome 10 open reading frame 48                                 | NM_173576    | 2.636 | 0.957 | 1.296 | 0.647 | 1.128 | 0.388 | Regulation of transcription, DNA-dependent.                                                                       |                                                                                                                                     |

|                |                                                                   |              |       |       |       |       |       |       |       |       |                                                                                                                               |
|----------------|-------------------------------------------------------------------|--------------|-------|-------|-------|-------|-------|-------|-------|-------|-------------------------------------------------------------------------------------------------------------------------------|
| CHL1           | cell adhesion molecule with homology to L1CAM precursor           | NM_006614    |       |       | 2.562 | 0.773 | 1.304 | 0.612 | 1.191 | 0.715 | Cell adhesion. Signal transduction.                                                                                           |
| CA4            | * carbonic anhydrase IV, precursor*                               | BC057792     |       |       | 1.381 | 0.515 | 1.683 | 0.457 | 1.992 | 0.501 | One-carbon compound metabolism.                                                                                               |
| N/A            | N/A                                                               | AK127156     |       |       | 2.031 | 0.635 | 1.43  | 0.65  | 1.594 | 0.613 |                                                                                                                               |
| GPR25          | G protein-coupled receptor 25                                     | NM_005298    |       |       | 1.797 | 0.645 | 1.285 | 0.538 | 1.953 | 0.796 | Signal transduction. G-protein coupled receptor protein signaling pathway.                                                    |
| N/A            | * cyclin-dependent kinase 5, regulatory subunit 2 (p39)*          | BT007437     |       |       | 1.906 | 0.743 | 1.749 | 0.854 | 1.389 | 0.83  |                                                                                                                               |
| C21orf29       | chromosome 21 open reading frame 29                               | NM_144991    |       |       | 1.472 | 1.205 | 1.827 | 0.678 | 1.741 | 0.709 |                                                                                                                               |
| DKFZp686I0554  | hypothetical proteincDNA DKFZp686I0554 (from clone DKFZp BX640900 |              |       |       | 1.487 | 0.897 | 1.454 | 0.56  | 2.098 | 0.607 |                                                                                                                               |
| VIPR1          | vasoactive intestinal peptide receptor 1                          | NM_004624    |       |       | 1.441 | 0.759 | 1.584 | 0.265 | 2.013 | 0.581 | Muscle contraction. Immune response. Signal transduction. G-protein signaling, coupled to cyclic nucleotide second messenger. |
| SOX21          | SRY-box 21                                                        | NM_007084    |       |       | 2.268 | 0.819 | 1.602 | 0.655 | 1.168 | 0.429 | Establishment and/or maintenance of chromatin architecture. Transcription.                                                    |
| mop-1          | MOP-1                                                             | AB014771     | 2.425 | 2.281 | 2.979 | 0.622 |       |       | 2.059 | 0.909 | Cytokinesis. Small GTPase mediated signal transduction.                                                                       |
| ADCYAP1        | adenylate cyclase activating polypeptide precursor                | NM_001117    | 1.222 | 1.407 | 1.928 | 0.551 | 1.177 | 0.356 | 1.93  | 0.676 | Adenylate cyclase activation. Cell-cell signaling. Pregnancy.                                                                 |
| ALDH1A2        | aldehyde dehydrogenase 1A2 isoform 1                              | NM_003888    |       |       | 2.003 | 0.653 | 1.389 | 0.554 | 1.642 | 0.599 | Vitamin A metabolism. Metabolism.                                                                                             |
| UNQ3030        | ELL3030                                                           | NM_198565    |       |       | 1.483 | 0.439 | 1.522 | 0.583 | 2.028 | 0.578 |                                                                                                                               |
| NEFL           | NEFL protein                                                      | BC039237     |       |       | 1     | 1.202 | 1.722 | 0.442 | 2.311 | 0.418 |                                                                                                                               |
| KREMEN2        | kringle-containing transmembrane protein 2 isoform c precursor    | NM_145348    |       |       | 1.35  | 0.838 | 1.976 | 0.666 | 1.701 | 0.467 | Wnt receptor signaling pathway.                                                                                               |
| CD38           | CD38 antigen                                                      | NM_001775    |       |       | 2.551 | 0.617 |       |       | 2.475 | 0.441 | Generation of precursor metabolites and energy. Signal transduction. Induction of apoptosis by extracellular signals.         |
| IRF5           | interferon regulatory factor 5 isoform a                          | NM_002200    |       |       | 1.861 | 0.488 | 1.353 | 0.542 | 1.809 | 0.569 | Regulation of transcription, DNA-dependent.                                                                                   |
| GUCY2D         | * guanylate cyclase 2D, membrane (retina-specific)*               | NM_000180    |       |       | 1.918 | 0.867 | 1.644 | 0.676 | 1.448 | 0.746 | CGMP biosynthesis. Protein amino acid phosphorylation. Receptor guanylyl cyclase signaling pathway.                           |
| LHFPL3         | lipoma HMGIC fusion partner-like 3                                | NM_199000    |       |       | 1.409 | 0.634 | 1.611 | 0.579 | 1.983 | 0.662 |                                                                                                                               |
| ELAVL3         | ELAV-like protein 3 isoform 1                                     | NM_001420    |       |       | 1.193 | 0.648 | 1.634 | 0.626 | 2.165 | 0.451 | Neurogenesis. Cell differentiation.                                                                                           |
| KIRREL2        | kin of IRRE-like 2 isoform c                                      | NM_199180    |       |       | 1.567 | 0.758 | 1.591 | 0.783 | 1.832 | 0.968 | Cell adhesion.                                                                                                                |
| KIAA0514       | KIAA0514 protein                                                  | NM_014696    |       |       | 1.276 | 0.435 | 1.477 | 0.437 | 2.234 | 0.45  |                                                                                                                               |
| DKFZp779E2271  | hypothetical proteincDNA DKFZp779E2271 (from clone DKFZi BX537865 |              |       |       | 2.02  | 0.416 | 1.223 | 0.522 | 1.744 | 0.532 |                                                                                                                               |
| CR2            | complement receptor                                               | X68990       |       |       | 2.342 | 0.343 | 1.298 | 0.493 | 1.346 | 0.394 |                                                                                                                               |
| ESPN           | espin                                                             | NM_031475    |       |       | 1.19  | 0.597 | 1.711 | 0.782 | 2.079 | 0.837 | Cell adhesion.                                                                                                                |
| ADRB3          | * adrenergic, beta-3-, receptor*                                  | NM_000025    |       |       | 1.748 | 0.405 | 1.085 | 0.449 | 2.145 | 0.687 | Carbohydrate metabolism. Generation of precursor metabolites and energy. Energy reserve metabolism. Signal transduction.      |
| N/A            | protein tyrosine phosphatase non-receptor type substrate prote    | AY424277     |       |       | 1.705 | 0.7   | 1.221 | 0.497 | 2.049 | 0.469 |                                                                                                                               |
| GJB3           | connexin 31                                                       | AF052692     |       |       | 1.817 | 0.505 | 1.283 | 0.467 | 1.874 | 0.393 | Cell communication. Perception of sound.                                                                                      |
| KRT4           | keratin 4                                                         | NM_002272    |       |       | 1.768 | 0.443 | 1.512 | 0.309 | 1.687 | 0.746 | Cytoskeleton organization and biogenesis.                                                                                     |
| SLC27A2        | * solute carrier family 27 (fatty acid transporter), member 2*    | NM_003645    |       |       | 1.943 | 0.889 | 1.146 | 0.982 | 1.874 | 0.862 | Very-long-chain fatty acid metabolism. Lipid metabolism.                                                                      |
| WNT11          | * wingless-type MMTV integration site family, member 11 precursor | NM_004626    |       |       | 1.898 | 0.815 | 1.54  | 0.708 | 1.522 | 0.895 | Signal transduction. Frizzled-2 signaling pathway. Cell-cell signaling. Development. Morphogenesis.                           |
| FGF19          | fibroblast growth factor 19 precursor                             | NM_005117    |       |       | 1.919 | 0.588 | 1.314 | 0.728 | 1.725 | 0.7   | Neurogenesis.                                                                                                                 |
| N/A            | N/AcDNA DKFZp434J193 (from clone DKFZp434J193).                   | AL080137     |       |       | 1.513 | 0.831 | 1.058 | 0.513 | 2.385 | 0.327 |                                                                                                                               |
| FGF3           | fibroblast growth factor 3 precursor                              | NM_005247    |       |       | 1.288 | 0.443 | 1.602 | 0.752 | 2.066 | 0.537 | Regulation of cell cycle. Signal transduction. Cell-cell signaling. Cell proliferation. Morphogenesis.                        |
| MGC39715       | hypothetical protein MGC39715                                     | NM_152628    |       |       | 2.216 | 0.626 | 1.316 | 0.429 | 1.42  | 0.686 | Intracellular signaling cascade. Protein transport.                                                                           |
| FLJ25037       | hypothetical protein FLJ25037                                     | NM_182596    |       |       | 2.152 | 0.706 | 1.463 | 0.663 | 1.328 | 0.628 | Mitotic chromosome condensation.                                                                                              |
| LOC124842      | hypothetical protein LOC124842                                    | NM_207313    |       |       | 1.501 | 0.65  | 1.714 | 0.667 | 1.725 | 0.703 |                                                                                                                               |
| FLJ16517       | FLJ16517 protein                                                  | NM_001004317 |       |       | 3.573 | 0.855 |       |       | 1.367 | 1.203 | Regulation of transcription, DNA-dependent                                                                                    |
| OTX1           | orthodenticle 1                                                   | NM_014562    |       |       | 2.792 | 0.988 | 1.053 | 0.768 | 1.094 | 0.602 | Regulation of transcription, DNA-dependent. Development.                                                                      |
| DKFZp686E13109 | hypothetical proteincDNA DKFZp686E13109 (from clone DKFz BX648771 |              |       |       | 2.151 | 1.039 | 1.147 | 0.854 | 1.638 | 0.998 | Protein amino acid dephosphorylation. Phosphate metabolism.                                                                   |
| LHX3           | LIM homeobox protein 3 isoform b                                  | NM_014564    |       |       | 1.133 | 0.428 | 1.893 | 0.885 | 1.906 | 0.775 | Regulation of transcription, DNA-dependent. Organogenesis.                                                                    |
| HLXB9          | homeo box HB9                                                     | NM_005515    |       |       | 1.75  | 0.778 | 1.542 | 0.611 | 1.64  | 0.77  | Regulation of transcription from RNA polymerase II promoter. Humoral immune response. Morphogenesis.                          |
| KCNJ9          | potassium inwardly-rectifying channel subfamily J9                | NM_004983    |       |       | 2.342 | 0.298 | 1.144 | 0.657 | 1.443 | 0.255 | Ion transport. Potassium ion transport.                                                                                       |
| GFR4           | GDNF family receptor alpha 4 isoform b precursor                  | NM_145762    |       |       | 1.777 | 0.453 | 1.039 | 0.601 | 2.112 | 0.612 |                                                                                                                               |
| LOC120224      | hypothetical protein BC016153                                     | NM_138788    |       |       | 1.141 | 0.439 | 1.5   | 0.574 | 2.283 | 0.685 |                                                                                                                               |
| N/A            | N/A                                                               | BX161496     |       |       | 1.53  | 0.647 | 1.727 | 0.587 | 1.666 | 0.613 |                                                                                                                               |
| ACDC           | adiponectin precursor                                             | NM_004797    | 2.302 | 0.854 | 2.135 | 0.504 | 1.145 | 0.729 | 1.639 | 0.817 | Generation of precursor metabolites and energy. Phosphate transport.                                                          |
| N/A            | N/A                                                               | AK026773     |       |       | 1.385 | 0.671 | 1.76  | 0.872 | 1.767 | 0.949 | Transport.                                                                                                                    |
| SLC6A7         | * solute carrier family 6, member 7*                              | NM_014228    |       |       | 1.243 | 0.337 | 1.495 | 0.538 | 2.169 | 0.465 | Neurotransmitter transport. Amino acid transport. Synaptic transmission. L-proline transport.                                 |
| FOXA2          | forkhead box A2                                                   | NM_021784    |       |       | 1.338 | 0.864 | 1.638 | 1.106 | 1.93  | 1.151 | Transcription. Regulation of transcription, DNA-dependent.                                                                    |
| CXCR4          | chemokine (C-X-C motif) receptor 4                                | NM_003467    |       |       | 1.899 | 0.844 | 1.234 | 0.652 | 1.772 | 0.632 | Signal transduction. G-protein coupled receptor protein signaling pathway.                                                    |
| OTOP3          | otopetrin 3                                                       | NM_178233    |       |       | 1.407 | 0.407 | 1.361 | 0.43  | 2.13  | 0.762 |                                                                                                                               |
| SOX2           | sex-determining region Y-box 2                                    | NM_003106    |       |       | 1.572 | 0.431 | 1.316 | 0.457 | 2.005 | 0.852 | Establishment and/or maintenance of chromatin architecture. Transcription. Regulation of transcription, DNA-dependent.        |
| CHR3SYT        | chr3 synaptotagmin                                                | NM_031913    |       |       | 2.033 | 0.457 | 1.192 | 0.31  | 1.668 | 0.542 |                                                                                                                               |
| ADCY1          | brain adenylate cyclase 1                                         | NM_021116    |       |       | 1.762 | 0.769 | 1.263 | 1.237 | 1.864 | 1.168 | Protein amino acid phosphorylation. Signal transduction. Alcohol metabolism. Lipid metabolism. Metabolism.                    |
| JPH1           | JPH1 protein                                                      | BC049372     |       |       | 1.797 | 0.645 | 1.513 | 0.798 | 1.578 | 0.524 |                                                                                                                               |

|          |                                                                    |           |       |       |       |       |       |       |       |       |                                                                                                                      |
|----------|--------------------------------------------------------------------|-----------|-------|-------|-------|-------|-------|-------|-------|-------|----------------------------------------------------------------------------------------------------------------------|
| PALM     | paralemmin                                                         | NM_002579 |       |       | 1.565 | 1.29  | 1.304 | 0.947 | 2.016 | 0.837 | Cell motility. Regulation of cell shape.                                                                             |
| SOX3     | SRY (sex determining region Y)-box 3                               | NM_005634 |       |       | 1.82  | 0.746 | 1.574 | 0.639 | 1.489 | 0.915 | Transcription. Regulation of transcription, DNA-dependent. Central nervous system development.                       |
| CDS1     | phosphatidate cytidylyltransferase 1                               | NM_001263 |       |       | 1.846 | 0.91  | 1.572 | 0.753 | 1.463 | 0.613 | Lipid metabolism. Signal transduction. Visual perception. Phospholipid biosynthesis.                                 |
| PTCHD1   | patched domain containing 1                                        | NM_173495 |       |       | 2.225 | 0.844 | 1.401 | 0.456 | 1.251 | 0.732 |                                                                                                                      |
| ABCC8    | * ATP-binding cassette, sub-family C, member 8*                    | NM_000352 |       |       | 2.54  | 0.726 |       |       | 2.333 | 0.757 | Carbohydrate metabolism. Transport. Potassium ion transport.                                                         |
| CLIC5    | chloride intracellular channel 5                                   | BC035968  |       |       | 1.665 | 0.545 | 1.158 | 0.339 | 2.048 | 0.389 | Ion transport. Chloride transport. Pregnancy.                                                                        |
| CADPS    | Ca2+-dependent secretion activator isoform 1                       | NM_003716 |       |       | 1.547 | 0.365 | 1.261 | 0.861 | 2.06  | 0.898 | Exocytosis.                                                                                                          |
| PTGFRN   | prostaglandin F2 receptor negative regulator                       | NM_020440 |       |       | 1.986 | 0.516 | 1.044 | 0.445 | 1.837 | 0.498 | Negative regulation of protein biosynthesis.                                                                         |
| CRLF1    | cytokine receptor-like factor 1                                    | NM_004750 |       |       | 1.635 | 0.494 | 1.869 | 0.508 | 1.362 | 0.613 | Antimicrobial humoral response.                                                                                      |
| SHD      | src homology 2 domain-containing transforming protein D            | NM_020209 |       |       | 1.99  | 1.255 | 1.331 | 0.719 | 1.543 | 0.683 | Intracellular signaling cascade.                                                                                     |
| PAQR9    | progesterin and adipoQ receptor family member IX                   | NM_198504 |       |       | 2.237 | 0.876 | 1.406 | 1.045 | 1.217 | 0.864 |                                                                                                                      |
| KIT      | v-kit Hardy-Zuckerman 4 feline sarcoma viral oncogene homol        | NM_000222 |       |       | 1.747 | 0.579 | 1.907 | 0.748 | 1.206 | 0.482 | Signal transduction. Transmembrane receptor protein tyrosine kinase signaling pathway.                               |
| NALP6    | * NACHT, leucine rich repeat and PYD containing 6*                 | NM_138329 |       |       | 1.685 | 0.665 | 1.079 | 0.226 | 2.093 | 0.747 |                                                                                                                      |
| C6orf85  | ion transporter protein                                            | NM_021945 |       |       | 2.548 | 0.41  |       |       | 2.307 | 0.639 | Transport.                                                                                                           |
| N/A      | N/A                                                                | AK095054  |       |       | 1.207 | 0.929 | 1.789 | 0.69  | 1.855 | 0.51  |                                                                                                                      |
| FLJ39237 | FLJ39237 protein                                                   | NM_198571 |       |       | 1.541 | 0.355 | 1.985 | 0.514 | 1.325 | 0.377 |                                                                                                                      |
| C14orf25 | C14orf25 protein                                                   | BC038110  |       |       | 1.669 | 0.572 | 1.384 | 0.382 | 1.796 | 0.333 |                                                                                                                      |
| Wnt10B   | Wnt10B                                                             | U81787    |       |       | 1.565 | 0.646 | 1.492 | 0.502 | 1.788 | 0.346 | Signal transduction. Frizzled-2 signaling pathway. Development.                                                      |
| PCSK1    | proprotein convertase subtilisin/kexin type 1 preproprotein        | NM_000439 |       |       | 1.871 | 1.009 | 1.123 | 0.664 | 1.85  | 1.069 | Proteolysis and peptidolysis. Cell-cell signaling. Metabolism.                                                       |
| VSNL1    | visinin-like 1                                                     | NM_003385 |       |       | 3.078 | 0.47  |       |       | 1.76  | 0.888 |                                                                                                                      |
| IFNA2    | * interferon, alpha 2*                                             | NM_000605 |       |       | 3.228 | 0.42  |       |       | 1.609 | 0.333 | Defense response. Cell-cell signaling. Response to virus.                                                            |
| KRT9     | keratin 9                                                          | NM_000226 |       |       | 1.439 | 0.758 | 1.294 | 0.744 | 2.101 | 0.449 | Epidermis development.                                                                                               |
| FLJ39630 | hypothetical protein FLJ39630                                      | NM_173688 |       |       | 1.659 | 0.619 | 1.552 | 0.613 | 1.622 | 0.783 |                                                                                                                      |
| FBXO27   | F-box protein 27                                                   | NM_178820 |       |       | 2.252 | 0.386 | 1.135 | 0.385 | 1.446 | 0.35  | Protein amino acid phosphorylation. Signal transduction. Alcohol metabolism. Lipid metabolism. Metabolism.           |
| FGF11    | fibroblast growth factor 11                                        | NM_004112 |       |       | 1.357 | 0.676 | 1.586 | 0.624 | 1.887 | 0.584 | Signal transduction. Cell-cell signaling. Neurogenesis.                                                              |
| MGAT3    | * mannosyl (beta-1,4-)-glycoprotein beta-1,4-N-acetylglucosam      | NM_002409 |       |       | 1.053 | 0.652 | 1.538 | 0.368 | 2.238 | 0.582 | N-linked glycosylation.                                                                                              |
| CACNA1S  | * calcium channel, voltage-dependent, L type, alpha 1S subun       | NM_000069 |       |       | 1.304 | 0.501 | 1.28  | 0.67  | 2.239 | 0.95  | Cation transport. Calcium ion transport. Muscle contraction.                                                         |
| TP73     | tumor protein p73                                                  | NM_005427 |       |       | 1.359 | 0.412 | 1.901 | 0.692 | 1.554 | 0.882 | Mismatch repair. Transcription. Regulation of transcription, DNA-dependent. Apoptosis. Cell cycle.                   |
| OTOF     | otoferlin isoform a                                                | NM_194248 |       |       | 1.381 | 0.467 | 1.268 | 0.358 | 2.162 | 0.386 | Membrane fusion. Perception of sound.                                                                                |
| N/A      | N/A                                                                | AK096006  |       |       | 1.843 | 0.464 | 1.174 | 0.49  | 1.79  | 0.528 |                                                                                                                      |
| RAB6B    | * RAB6B, member RAS oncogene family*                               | NM_016577 |       |       | 1.521 | 0.922 | 1.135 | 0.303 | 2.151 | 0.908 | Intracellular protein transport. Retrograde transport, Golgi to ER. Small GTPase mediated signal transduction.       |
| PYC1     | pyrin-domain containing protein                                    | AF467809  |       |       | 1.692 | 0.342 | 1.557 | 0.604 | 1.558 | 0.471 |                                                                                                                      |
| KIAA0845 | KIAA0845 protein                                                   | AB020652  |       |       | 1.957 | 0.572 | 1.077 | 0.391 | 1.763 | 0.728 | Nucleosome assembly. Neurogenesis.                                                                                   |
| N/A      | apoptosis related protein APR-2                                    | AF143236  |       |       | 1.333 | 0.698 | 1.341 | 0.579 | 2.122 | 0.523 | Electron transport. Apoptosis.                                                                                       |
| AGC1     | aggrecan 1 isoform 2 precursor                                     | NM_013227 |       |       | 1.853 | 1.289 | 1.533 | 0.575 | 1.409 | 0.825 | Cell adhesion.                                                                                                       |
| ZMYND15  | * zinc finger, MYND domain containing 15*                          | NM_032265 | 1.673 | 1.507 | 2.074 | 1.491 | 1.456 | 0.762 | 1.264 | 0.837 |                                                                                                                      |
| TLX1     | * T-cell leukemia, homeobox 1*                                     | NM_005521 |       |       | 2.359 | 0.395 |       |       | 2.434 | 0.855 | Regulation of transcription, DNA-dependent. Development.                                                             |
| N/A      | N/A                                                                | AK127178  |       |       | 1.893 | 0.737 | 1.591 | 0.604 | 1.309 | 0.4   |                                                                                                                      |
| N/A      | precursor (AA-19 to 692)                                           | X53961    |       |       | 1.57  | 0.551 | 1.179 | 0.423 | 2.035 | 0.602 | Transport. Iron ion transport. Iron ion homeostasis. Humoral immune response. Defense response to bacteria.          |
| SPTB     | * spectrin, beta, erythrocytic (includes spherocytosis, clinical b | NM_000347 |       |       | 2.148 | 0.989 | 1.165 | 0.523 | 1.466 | 0.645 |                                                                                                                      |
| SCAP1    | src family associated phosphoprotein 1                             | BC047870  |       |       | 1.804 | 0.968 | 1.335 | 1.07  | 1.64  | 0.954 | Immune response. Signal transduction.                                                                                |
| MGC42367 | similar to 2010300C02Rik protein                                   | NM_207362 |       |       | 2.258 | 0.792 | 1.351 | 0.525 | 1.168 | 0.472 |                                                                                                                      |
| GATA-6   | GATA-6 DNA binding protein                                         | X95701    |       |       | 3.328 | 1.344 |       |       | 1.449 | 0.688 | Transcription. Regulation of transcription, DNA-dependent. Muscle development. Positive regulation of transcription. |
| N/A      | interferon alpha 2b                                                | AY255838  |       |       | 3.168 | 0.465 |       |       | 1.606 | 0.297 | Defense response. Cell-cell signaling. Response to virus.                                                            |
| N/A      | N/A                                                                | AK130238  |       |       | 1.015 | 0.539 | 1.573 | 0.588 | 2.181 | 0.639 |                                                                                                                      |
| GSH-2    | homeobox protein GSH-2                                             | NM_133267 |       |       | 1.254 | 0.384 | 1.39  | 0.639 | 2.122 | 0.526 | Regulation of transcription, DNA-dependent. Development.                                                             |
| ADRA2A   | alpha-2A-adrenergic receptor                                       | NM_000681 |       |       | 1.977 | 0.913 | 1.479 | 0.377 | 1.309 | 0.646 | Activation of MAPK. Cell motility. Signal transduction. G-protein coupled receptor protein signaling pathway.        |
| PGA5     | * pepsinogen 5, group I (pepsinogen A)*                            | BC029055  |       |       | 2.11  | 0.321 |       |       | 2.655 | 0.197 |                                                                                                                      |
| N/A      | N/A                                                                | AK128180  |       |       | 1.426 | 0.729 |       |       | 3.336 | 0.275 |                                                                                                                      |
| N/A      | N/A                                                                | BC035798  |       |       | 1.761 | 1.139 | 1.544 | 1.087 | 1.453 | 0.494 |                                                                                                                      |
| FLJ20619 | hypothetical protein FLJ20619                                      | NM_017904 |       |       | 1.285 | 0.443 | 1.372 | 0.497 | 2.099 | 0.585 |                                                                                                                      |
| SATB2    | SATB family member 2                                               | NM_015265 |       |       | 3.72  | 0.65  | 1.035 | 0.491 |       |       | Regulation of transcription, DNA-dependent.                                                                          |
| PENK     | proenkephalin                                                      | NM_006211 |       |       | 1.445 | 0.653 | 1.209 | 0.493 | 2.1   | 0.435 | Signal transduction. Neuropeptide signaling pathway. Cell-cell signaling.                                            |
| TIP39    | tuberoinfundibular 39 residue protein precursor                    | NM_178449 |       |       | 1.705 | 0.965 | 1.116 | 0.565 | 1.929 | 0.806 |                                                                                                                      |
| NXPH4    | neurexophilin 4                                                    | NM_007224 | 1.457 | 1.341 | 1.337 | 0.759 | 1.013 | 0.626 | 2.399 | 1.002 | Neuropeptide signaling pathway.                                                                                      |
| RTN1     | reticulon 1 isoform A                                              | NM_021136 |       |       | 2.166 | 0.38  | 1.392 | 0.627 | 1.186 | 0.879 | Signal transduction. Neuron cell differentiation.                                                                    |

|               |                                                                   |              |       |       |       |       |       |       |  |       |       |                                                                                                                        |
|---------------|-------------------------------------------------------------------|--------------|-------|-------|-------|-------|-------|-------|--|-------|-------|------------------------------------------------------------------------------------------------------------------------|
| MGC50844      | hypothetical protein MGC50844                                     | NM_178562    |       |       | 2.659 | 0.987 |       |       |  | 2.083 | 0.848 |                                                                                                                        |
| FBXO16        | F-box only protein 16                                             | NM_172366    |       |       | 2.955 | 0.761 |       |       |  | 1.783 | 0.683 | Ubiquitin cycle.                                                                                                       |
| HCN4          | hyperpolarization activated cyclic nucleotide-gated potassium c   | NM_005477    |       |       | 1.609 | 0.834 | 1.416 | 0.363 |  | 1.709 | 0.728 | Cation transport. Potassium ion transport. Sodium ion transport. Muscle contraction. Circulation.                      |
| RODH-4        | microsomal NAD+-dependent retinol dehydrogenase 4                 | NM_003708    |       |       | 1.84  | 0.219 | 1.025 | 0.23  |  | 1.868 | 0.254 | Lipid metabolism. Metabolism.                                                                                          |
| DKFZp761H171  | hypothetical proteincDNA DKFZp761H171 (from clone DKFZp           | AL137502     | 1.055 | 0.625 | 1.724 | 0.235 | 1.35  | 0.565 |  | 1.647 | 0.707 |                                                                                                                        |
| CRYBA2        | * crystallin, beta A2*                                            | NM_057093    |       |       | 1.336 | 0.81  | 1.643 | 0.467 |  | 1.739 | 0.531 |                                                                                                                        |
| HBA2          | alpha 2 globin                                                    | NM_000517    | 1.794 | 1.616 | 1.207 | 0.459 | 1.642 | 0.39  |  | 1.866 | 0.472 |                                                                                                                        |
| N/A           | N/A                                                               | BX248251     |       |       | 2.304 | 1.17  | 1.118 | 0.547 |  | 1.286 | 0.799 |                                                                                                                        |
| N/A           | N/A                                                               | AK095915     |       |       | 1.433 | 0.916 | 1.127 | 0.531 |  | 2.148 | 0.733 | Protein amino acid phosphorylation.                                                                                    |
| FGF4          | fibroblast growth factor 4 precursor                              | NM_002007    |       |       | 1.408 | 0.64  | 1.445 | 0.52  |  | 1.854 | 0.63  | Regulation of cell cycle. Mitosis. Signal transduction. Cell-cell signaling. Cell proliferation.                       |
| GRAP2         | GRB2-related adaptor protein 2                                    | NM_004810    |       |       | 2.855 | 0.793 |       |       |  | 1.85  | 0.473 | Intracellular signaling cascade. Ras protein signal transduction. Cell-cell signaling. Antimicrobial humoral response. |
| AMACO         | A-domain containing protein similar to matrilin and collagen      | NM_198496    |       |       | 1.779 | 0.522 | 1.309 | 0.232 |  | 1.617 | 0.237 |                                                                                                                        |
| CDH22         | cadherin 22 precursor                                             | NM_021248    |       |       | 1.246 | 0.983 | 1.439 | 0.67  |  | 2.019 | 0.712 | Cell adhesion. Homophilic cell adhesion.                                                                               |
| FLJ40319      | hypothetical protein FLJ40319                                     | NM_182564    | 1.115 | 0.833 | 2.489 | 0.668 | 2.212 | 0.41  |  |       |       |                                                                                                                        |
| MK2S4         | protein kinase substrate MK2S4                                    | NM_052862    |       |       | 2.679 | 0.775 |       |       |  | 2.018 | 0.453 |                                                                                                                        |
| FLJ42461      | FLJ42461 protein                                                  | NM_198501    |       |       | 1.462 | 0.593 | 1.663 | 0.295 |  | 1.571 | 0.644 |                                                                                                                        |
| N/A           | Unknown (protein for IMAGE:4694038)                               | BC020891     |       |       | 2.084 | 0.515 | 1.011 | 0.54  |  | 1.598 | 0.663 |                                                                                                                        |
| GALR2         | galanin receptor 2                                                | NM_003857    |       |       | 1.318 | 0.601 | 1.507 | 0.653 |  | 1.867 | 0.832 | Muscle contraction. G-protein coupled receptor protein signaling pathway.                                              |
| GCM2          | glial cells missing homolog 2                                     | NM_004752    |       |       | 1.861 | 0.526 | 1.265 | 0.443 |  | 1.553 | 0.607 | Transcription. Regulation of transcription, DNA-dependent. Development.                                                |
| MOS           | v-mos Moloney murine sarcoma viral oncogene homolog               | NM_005372    |       |       | 2.203 | 0.715 | 1.1   | 0.403 |  | 1.374 | 0.646 | Regulation of cell cycle. Protein amino acid phosphorylation.                                                          |
| N/A           | N/A                                                               | AK094219     |       |       | 1.67  | 0.64  | 1.204 | 0.62  |  | 1.799 | 0.784 |                                                                                                                        |
| CR2           | complement component (3d/Epstein Barr virus) receptor 2 isof      | NM_001006658 |       |       | 2.257 | 0.41  | 1.094 | 0.451 |  | 1.313 | 0.186 | Immune response. Complement activation, classical pathway.                                                             |
| N/A           | N/A                                                               | AK126643     | 1.605 | 1.221 | 1.313 | 0.861 | 1.492 | 0.364 |  | 1.848 | 0.701 |                                                                                                                        |
| DKFZp434M202  | hypothetical protein DKFZp434M202                                 | NM_182499    |       |       | 2.136 | 0.561 |       |       |  | 2.514 | 0.496 |                                                                                                                        |
| C6orf189      | C6orf189 protein                                                  | BC038997     |       |       | 2.099 | 0.685 | 1.341 | 0.43  |  | 1.21  | 0.343 |                                                                                                                        |
| KIAA0466      | KIAA0466 protein                                                  | AB007935     |       |       | 2.076 | 0.874 |       |       |  | 2.569 | 0.901 |                                                                                                                        |
| N/A           | alpha2i-subunit of soluble guanylyl cyclase                       | Z50053       |       |       | 1.852 | 0.549 | 1.329 | 0.415 |  | 1.462 | 0.621 | CGMP biosynthesis. Intracellular signaling cascade.                                                                    |
| HTR2C         | 5-hydroxytryptamine (serotonin) receptor 2C                       | NM_000868    |       |       | 1.053 | 0.97  | 1.55  | 0.684 |  | 2.035 | 0.701 | Signal transduction. Serotonin receptor signaling pathway. Synaptic transmission. Feeding behavior.                    |
| LOC255743     | hypothetical protein LOC255743                                    | NM_198278    |       |       | 1.503 | 0.756 | 1.538 | 0.578 |  | 1.595 | 1.01  |                                                                                                                        |
| SLOC2B1       | * solute carrier organic anion transporter family, member 2B1*    | NM_007256    |       |       | 2.086 | 1.165 |       |       |  | 2.55  | 0.914 | Ion transport.                                                                                                         |
| FLJ00030      | FLJ00030 protein                                                  | AK024440     |       |       | 1.388 | 0.411 | 1.411 | 0.403 |  | 1.836 | 0.592 | Metabolism.                                                                                                            |
| C20orf46      | chromosome 20 open reading frame 46                               | NM_018354    |       |       | 1.482 | 0.926 | 1.262 | 0.566 |  | 1.885 | 1.13  |                                                                                                                        |
| HBF-3         | N/A                                                               | X74144       |       |       | 2.22  | 0.826 | 1.075 | 0.475 |  | 1.331 | 0.699 | Regulation of transcription, DNA-dependent. Brain development.                                                         |
| DKFZp547A0817 | hypothetical proteincDNA DKFZp547A0817 (from clone DKFZ           | AL832541     |       |       | 1.286 | 0.984 | 1.015 | 0.329 |  | 2.324 | 0.579 |                                                                                                                        |
| CDK5R2        | * cyclin-dependent kinase 5, regulatory subunit 2*                | NM_003936    |       |       | 2.251 | 0.849 |       |       |  | 2.374 | 0.773 | Regulation of cyclin dependent protein kinase activity.                                                                |
| C14orf39      | chromosome 14 open reading frame 39                               | NM_174978    |       |       | 2.499 | 0.558 | 1.068 | 0.598 |  | 1.051 | 0.631 |                                                                                                                        |
| N/A           | susceptibility protein NSG-x                                      | AF211119     | 1.086 | 0.746 | 2.426 | 0.314 | 1.018 | 0.496 |  | 1.171 | 0.444 |                                                                                                                        |
| COL9A2        | alpha 2 type IX collagen                                          | NM_001852    |       |       | 1.222 | 0.599 | 1.726 | 0.596 |  | 1.666 | 0.598 | Skeletal development. Phosphate transport.                                                                             |
| CNTFR         | ciliary neurotrophic factor receptor preproprotein                | NM_147164    |       |       | 1.277 | 0.544 | 1.699 | 0.414 |  | 1.633 | 0.479 | Signal transduction. Neurogenesis.                                                                                     |
| BTNL2         | butyrophilin-like 2                                               | NM_019602    |       |       | 2.468 | 0.397 |       |       |  | 2.14  | 0.314 |                                                                                                                        |
| CACNA1A       | * calcium channel, alpha 1A subunit isoform 2*                    | NM_023035    |       |       | 1.831 | 1.372 | 1.238 | 0.852 |  | 1.537 | 0.868 | Regulation of transcription, DNA-dependent. Cation transport. Calcium ion transport.                                   |
| CHRN2         | * cholinergic receptor, nicotinic, beta polypeptide 2 (neuronal)* | NM_000748    |       |       | 1.068 | 0.551 | 1.557 | 0.679 |  | 1.979 | 0.737 | Ion transport. Signal transduction. Synaptic transmission.                                                             |
| RIPK3         | RIPK3 protein                                                     | BC041668     |       |       | 2.339 | 0.788 |       |       |  | 2.264 | 0.521 | Protein amino acid phosphorylation.                                                                                    |
| N/A           | Unknown (protein for MGC:78661)                                   | BC068080     |       |       | 1.66  | 1.221 | 1.473 | 0.835 |  | 1.469 | 1.059 |                                                                                                                        |
| IL22RA1       | * interleukin 22 receptor, alpha 1*                               | NM_021258    |       |       | 1.402 | 1.237 | 1.762 | 1.462 |  | 1.432 | 0.452 |                                                                                                                        |
| DLL3          | delta-like 3 protein isoform 1 precursor                          | NM_016941    |       |       | 1.512 | 0.591 | 1.327 | 0.769 |  | 1.757 | 0.877 | Skeletal development. Embryonic development. Cell fate determination. Notch signaling pathway.                         |
| PTGDR         | prostaglandin D2 receptor                                         | NM_000953    |       |       | 1.695 | 0.568 | 1.607 | 0.789 |  | 1.293 | 0.34  | Signal transduction. G-protein coupled receptor protein signaling pathway.                                             |
| N/A           | N/A                                                               | AK094626     |       |       | 2.264 | 0.463 |       |       |  | 2.325 | 0.47  |                                                                                                                        |
| SOX17         | SRY-box 17                                                        | NM_022454    |       |       | 2.241 | 0.762 | 1.256 | 0.803 |  | 1.082 | 0.72  | Regulation of transcription, DNA-dependent.                                                                            |
| COL27A1       | * collagen, type XXVII, alpha 1*                                  | NM_032888    |       |       | 1.393 | 0.886 | 1.747 | 0.982 |  | 1.436 | 0.925 | Phosphate transport. Cell adhesion.                                                                                    |
| HAP1          | huntingtin-associated protein 1 isoform 1                         | NM_003949    |       |       | 1.834 | 0.644 | 1.476 | 0.304 |  | 1.265 | 0.403 | Synaptic transmission. Development.                                                                                    |
| CNDP1         | carboxypeptidase 1                                                | NM_032649    |       |       | 1.372 | 0.404 | 1.362 | 0.496 |  | 1.84  | 0.392 | Proteolysis and peptidolysis.                                                                                          |
| GBX2          | gastrulation brain homeo box 2                                    | NM_001485    |       |       | 2.322 | 1.062 | 1.117 | 0.831 |  | 1.132 | 0.656 | Regulation of transcription, DNA-dependent. Neurogenesis. Antimicrobial humoral response.                              |
| COL4A4        | alpha 4 type IV collagen precursor                                | NM_000092    | 1.413 | 0.877 | 1.476 | 0.409 | 1.651 | 0.366 |  | 1.444 | 0.659 | Phosphate transport. Long-term strengthening of neuromuscular junction.                                                |
| WDR8          | WDR8 protein                                                      | BC002611     |       |       | 1.81  | 0.718 | 1.359 | 0.75  |  | 1.398 | 0.782 |                                                                                                                        |
| IRF4          | lymphocyte specific interferon regulatory factor/interferon regul | U52682       |       |       | 1.361 | 0.712 | 1.864 | 0.585 |  | 1.342 | 0.632 | Transcription. Regulation of transcription, DNA-dependent. T-cell activation.                                          |

|           |                                                           |             |       |       |       |       |       |       |                                                                                                                            |       |                                                                                            |
|-----------|-----------------------------------------------------------|-------------|-------|-------|-------|-------|-------|-------|----------------------------------------------------------------------------------------------------------------------------|-------|--------------------------------------------------------------------------------------------|
| SCN4B     | * sodium channel, voltage-gated, type IV, beta*           | NM_174934   | 1.643 | 0.484 | 1.232 | 0.579 | 1.689 | 0.258 | Ion transport. Sodium ion transport. Synaptic transmission.                                                                |       |                                                                                            |
| NTRK3     | * neurotrophic tyrosine kinase, receptor, type 3*         | NM_002530   | 1.269 | 0.456 | 1.565 | 0.523 | 1.727 | 0.652 | Protein amino acid phosphorylation. Transmembrane receptor protein tyrosine kinase signaling pathway.                      |       |                                                                                            |
| MGC33600  | hypothetical protein MGC33600                             | NM_182539   | 1.522 | 0.749 | 1.312 | 0.463 | 1.726 | 0.632 |                                                                                                                            |       |                                                                                            |
| ACTA1     | alpha 1 actin precursor                                   | NM_001100   | 1.175 | 0.415 | 1.606 | 0.794 | 1.779 | 0.755 | Muscle development.                                                                                                        |       |                                                                                            |
| NT5C1A    | * 5'-nucleotidase, cytosolic IA*                          | NM_032526   | 1.895 | 0.624 | 1.276 | 0.488 | 1.384 | 0.416 | Nucleoside metabolism. Nucleotide metabolism.                                                                              |       |                                                                                            |
| MGC52498  | hypothetical protein MGC52498                             | NM_182621   | 1.8   | 0.751 | 1.016 | 0.564 | 1.729 | 1.076 | Protein amino acid phosphorylation. Signal transduction. Alcohol metabolism. Lipid metabolism. Metabolism.                 |       |                                                                                            |
| FLJ43826  | FLJ43826 protein                                          | NM_198502   | 1.866 | 0.471 | 1.041 | 0.395 | 1.631 | 0.589 | Protein amino acid phosphorylation. Signal transduction. Alcohol metabolism. Lipid metabolism. Metabolism.                 |       |                                                                                            |
| EPB49     | erythrocyte membrane protein band 4.9 (dematin)           | NM_001978   | 1.269 | 0.738 | 1.363 | 0.56  | 1.904 | 0.411 | Cytoskeleton organization and biogenesis. Actin filament bundle formation.                                                 |       |                                                                                            |
| SOST      | sclerosteosis                                             | NM_025237   | 1.98  | 0.979 | 1.044 | 0.404 | 1.51  | 0.413 | Negative regulation of ossification.                                                                                       |       |                                                                                            |
| N/A       | N/A                                                       | AK093672    | 1.477 | 0.565 | 1.124 | 0.262 | 1.933 | 0.449 |                                                                                                                            |       |                                                                                            |
| N/A       | Unknown (protein for MGC:46433)                           | BC036837    | 1.714 | 0.675 | 1.262 | 0.693 | 1.553 | 0.588 |                                                                                                                            |       |                                                                                            |
| OTOS      | otospiralin                                               | NM_148961   | 1.057 | 0.598 | 1.141 | 0.493 | 2.324 | 0.327 |                                                                                                                            |       |                                                                                            |
| CYP26B1   | * cytochrome P450, family 26, subfamily b, polypeptide 1* | NM_019885   | 1.067 | 0.879 | 2.306 | 1.053 | 1.148 | 0.53  | 1.066                                                                                                                      | 0.535 | Electron transport.                                                                        |
| MG29      | mitsugumin 29                                             | NM_01006603 | 2.085 | 0.627 |       |       | 2.432 | 0.55  | Transport.                                                                                                                 |       |                                                                                            |
| KIAA0474  | KIAA0474 protein                                          | AB007943    | 1.707 | 0.788 | 1.172 | 0.446 | 1.635 | 0.802 | Signal transduction.                                                                                                       |       |                                                                                            |
| DMRT2     | doublesex and mab-3 related transcription factor 2        | NM_006557   | 1.621 | 0.361 | 1.335 | 0.47  | 1.558 | 0.749 | Transcription. Regulation of transcription, DNA-dependent. Sex determination. Sex differentiation. Male gonad development. |       |                                                                                            |
| KIAA0945  | KIAA0945 protein                                          | AB023162    | 1.246 | 0.47  | 1.206 | 0.538 | 2.062 | 0.557 |                                                                                                                            |       |                                                                                            |
| GPR7      | G protein-coupled receptor 7                              | NM_005285   | 1.587 | 0.506 | 1.162 | 0.468 | 1.764 | 0.595 |                                                                                                                            |       |                                                                                            |
| KIAA1772  | KIAA1772                                                  | NM_024935   | 2.086 | 0.911 | 1.098 | 0.573 | 1.325 | 0.861 | Proteolysis and peptidolysis.                                                                                              |       |                                                                                            |
| CD8B1     | CD8 antigen beta polypeptide 1 isoform 1 precursor        | NM_172099   | 2.08  | 0.731 |       |       | 2.429 | 0.609 | Immune response. Transmembrane receptor protein tyrosine kinase signaling pathway. T-cell activation.                      |       |                                                                                            |
| FLJ33790  | hypothetical protein FLJ33790                             | NM_173583   | 1.743 | 1.417 | 1.45  | 1.066 | 1.313 | 1.21  | Protein amino acid phosphorylation. Signal transduction. Alcohol metabolism. Lipid metabolism.                             |       |                                                                                            |
| LG11      | * leucine-rich, glioma inactivated 1, precursor*          | BC022500    | 2.193 | 0.729 |       |       | 2.309 | 0.718 | Neurogenesis. Cell proliferation.                                                                                          |       |                                                                                            |
| CPVL      | serine carboxypeptidase vitellogenic-like                 | NM_019029   | 1.492 | 1.119 | 1.088 | 0.262 | 1.92  | 0.415 | Proteolysis and peptidolysis.                                                                                              |       |                                                                                            |
| PLXNC1    | plexin C1                                                 | NM_005761   | 1.636 | 1.135 | 1.325 | 0.684 | 1.537 | 1.14  | Cell adhesion. Development.                                                                                                |       |                                                                                            |
| KIAA1222  | KIAA1222 protein                                          | AB033048    | 2.439 | 0.585 |       |       | 2.056 | 0.254 | Neurogenesis. Cell differentiation.                                                                                        |       |                                                                                            |
| RASGRP2   | RAS guanyl releasing protein 2 isoform 1                  | NM_005825   | 1.364 | 0.914 | 1.509 | 0.582 | 1.621 | 0.843 | Regulation of cell growth. Small GTPase mediated signal transduction. Ras protein signal transduction.                     |       |                                                                                            |
| IL17RB    | interleukin 17B receptor isoform 2 precursor              | NM_172234   | 1.076 | 0.594 | 1.543 | 0.69  | 1.875 | 0.765 | Regulation of cell growth. Defense response.                                                                               |       |                                                                                            |
| ATF3      | activating transcription factor 3 delta Zip isoform       | NM_004024   | 2.381 | 1.629 | 1.091 | 1.087 | 1.021 | 0.734 | Transcription. Regulation of transcription, DNA-dependent.                                                                 |       |                                                                                            |
| N/A       | docking protein 1-like protein                            | AF229166    | 1.953 | 0.694 |       |       | 2.539 | 0.614 |                                                                                                                            |       |                                                                                            |
| N/A       | galanin-related peptide                                   | AF077047    | 1.489 | 1.129 | 1.061 | 0.704 | 1.937 | 1.004 |                                                                                                                            |       |                                                                                            |
| NPY5R     | neuropeptide Y receptor Y5                                | NM_006174   | 1.414 | 0.921 | 1.28  | 0.519 | 1.792 | 0.501 | Signal transduction. G-protein coupled receptor protein signaling pathway.                                                 |       |                                                                                            |
| CHRD1     | chordin-like 1                                            | NM_145234   | 1.801 | 1.359 | 1.075 | 0.561 | 1.608 | 0.518 | Development.                                                                                                               |       |                                                                                            |
| SIM2      | single-minded homolog 2 long isoform                      | NM_005069   | 1.985 | 0.681 | 1.191 | 0.675 | 1.3   | 0.75  | Transcription. Regulation of transcription, DNA-dependent. Signal transduction. Neurogenesis. Cell differentiation.        |       |                                                                                            |
| TLR2      | TLR2 protein                                              | BC033756    | 1.442 | 0.681 | 1.192 | 0.481 | 1.84  | 0.875 | Induction of apoptosis. Inflammatory response. Signal transduction.                                                        |       |                                                                                            |
| N/A       | N/A                                                       | AK124891    | 2.144 | 0.415 |       |       | 2.33  | 0.533 |                                                                                                                            |       |                                                                                            |
| HLA-G     | * major histocompatibility complex, class I, G precursor* | NM_002127   | 1.718 | 0.58  | 1.024 | 0.937 | 1.728 | 0.638 | Antigen presentation, endogenous antigen. Antigen processing, endogenous antigen via MHC class I.                          |       |                                                                                            |
| LOC199964 | hypothetical protein LOC199964                            | NM_182532   | 1.936 | 0.837 | 1.008 | 0.385 | 1.524 | 0.612 |                                                                                                                            |       |                                                                                            |
| C2orf23   | chromosome 2 open reading frame 23                        | NM_022912   | 1.704 | 0.858 | 1.035 | 0.661 | 1.727 | 0.947 |                                                                                                                            |       |                                                                                            |
| N/A       | N/A                                                       | AK075014    | 1.064 | 0.689 | 1.773 | 0.585 | 1.628 | 0.694 | Transport. Amino acid transport.                                                                                           |       |                                                                                            |
| NOPE      | DDM36                                                     | NM_020962   | 1.609 | 0.684 | 1.008 | 0.623 | 1.846 | 0.982 | Cell adhesion.                                                                                                             |       |                                                                                            |
| TRAF5     | TNF receptor-associated factor 5                          | NM_004619   | 3.297 | 0.434 |       |       | 1.163 | 0.631 | Apoptosis. Signal transduction. Protein ubiquitination. Positive regulation of I-kappaB kinase/NF-kappaB cascade.          |       |                                                                                            |
| N/A       | calcitonin receptor                                       | L00587      | 1.156 | 0.783 | 1.5   | 0.518 | 1.803 | 0.452 | Ossification. Signal transduction. G-protein coupled receptor protein signaling pathway. Adenylate cyclase activation.     |       |                                                                                            |
| SYT15     | synaptotagmin XV isoform a                                | NM_031912   | 1.105 | 0.21  | 1.386 | 0.457 | 1.967 | 0.774 |                                                                                                                            |       |                                                                                            |
| NRCAM     | neuronal cell adhesion molecule                           | NM_005010   | 1.867 | 0.637 | 1.343 | 0.368 | 1.245 | 0.499 | Neuronal migration. Axonal fasciculation. Synaptogenesis. Central nervous system development. Cell-cell adhesion.          |       |                                                                                            |
| GDA       | guanine deaminase                                         | NM_004293   | 1.869 | 0.391 | 1.151 | 0.4   | 1.431 | 0.361 | Nucleobase, nucleoside, nucleotide and nucleic acid metabolism. Neurogenesis.                                              |       |                                                                                            |
| N/A       | FP18279                                                   | AY203929    | 1.439 | 0.613 | 1.239 | 0.646 | 1.771 | 0.431 |                                                                                                                            |       |                                                                                            |
| CRTAC1    | cartilage acidic protein 1                                | NM_018058   | 1.298 | 0.722 | 1.572 | 0.691 | 1.577 | 0.772 | Cell-matrix adhesion.                                                                                                      |       |                                                                                            |
| OXCT2     | 3-oxoacid CoA transferase 2                               | NM_022120   | 1.511 | 0.727 | 1.055 | 0.365 | 1.874 | 0.637 | Metabolism.                                                                                                                |       |                                                                                            |
| MDS1      | myelodysplasia syndrome protein 1                         | NM_004991   | 3.046 | 1.012 |       |       | 1.393 | 0.935 |                                                                                                                            |       |                                                                                            |
| NPY       | neuropeptide Y                                            | BC029497    | 1.095 | 1.105 | 1.534 | 0.963 | 1.358 | 0.526 | 1.544                                                                                                                      | 0.71  | Calcium ion transport. Cell motility. G-protein signaling. Neuropeptide signaling pathway. |
| N/A       | Fc gamma receptor I                                       | L03419      | 2.188 | 0.28  |       |       | 2.248 | 0.446 |                                                                                                                            |       |                                                                                            |
| N/A       | N/A                                                       | AK127534    | 1.346 | 0.813 | 1.333 | 0.567 | 1.749 | 0.418 | Protein amino acid phosphorylation. Signal transduction. Alcohol metabolism. Lipid metabolism.                             |       |                                                                                            |
| IL5RA     | * interleukin 5 receptor, alpha isoform 1 precursor*      | NM_000564   | 1.635 | 0.777 | 1.317 | 1.014 | 1.473 | 0.623 | Signal transduction. Cell proliferation.                                                                                   |       |                                                                                            |
| MEGF10    | MEGF10 protein                                            | NM_032446   | 1.98  | 1.138 | 1.343 | 0.35  | 1.098 | 0.307 |                                                                                                                            |       |                                                                                            |
| PRKAG2    | PRKAG2 protein                                            | BC068598    | 2.411 | 0.464 |       |       | 2     | 0.596 | Fatty acid biosynthesis. Cholesterol biosynthesis.                                                                         |       |                                                                                            |
| N/A       | serine protease prostate                                  | AF113140    | 1.956 | 0.296 |       |       | 2.451 | 0.46  | Proteolysis and peptidolysis.                                                                                              |       |                                                                                            |

|           |                                                                 |           |       |       |       |       |       |       |       |       |                                                                                                        |
|-----------|-----------------------------------------------------------------|-----------|-------|-------|-------|-------|-------|-------|-------|-------|--------------------------------------------------------------------------------------------------------|
| CKLFSF8   | chemokine-like factor superfamily 8                             | NM_178868 |       |       | 1.12  | 0.803 | 1.282 | 0.58  | 2.005 | 0.763 | Chemotaxis. Sensory perception.                                                                        |
| KIAA0227  | N/A                                                             | D86980    |       |       | 2.746 | 0.784 |       |       | 1.656 | 0.552 |                                                                                                        |
| DUSP9     | dual specificity phosphatase 9                                  | NM_001395 |       |       | 1.348 | 0.799 | 1.431 | 0.992 | 1.623 | 1.038 | Inactivation of MAPK. Protein amino acid dephosphorylation. JNK cascade.                               |
| MGC35338  | hypothetical protein MGC35338                                   | NM_152389 |       |       | 2.846 | 0.604 |       |       | 1.553 | 0.505 |                                                                                                        |
| SYN2      | synapsin II isoform Iib                                         | NM_003178 |       |       | 1.358 | 0.757 | 1.053 | 0.884 | 1.987 | 0.733 | Synaptic transmission. Neurotransmitter secretion.                                                     |
| SLC6A2    | SLC6A2 protein                                                  | BC060831  |       |       | 1.159 | 0.555 | 1.362 | 0.851 | 1.877 | 0.64  | Neurotransmitter transport. Synaptic transmission.                                                     |
| LRRN6A    | leucine-rich repeat neuronal 6A                                 | NM_032808 |       |       | 1.624 | 0.794 | 1.506 | 0.57  | 1.266 | 0.61  |                                                                                                        |
| N/A       | FP1188                                                          | AF370365  |       |       | 1.363 | 0.901 | 1.257 | 0.576 | 1.774 | 0.724 |                                                                                                        |
| CGREF1    | cell growth regulator with EF hand domain 1                     | NM_006569 |       |       | 1.169 | 0.676 | 1.393 | 0.575 | 1.827 | 0.658 | Response to stress. Cell cycle. Cell cycle arrest. Negative regulation of cell proliferation.          |
| CART      | cocaine- and amphetamine-regulated transcript                   | NM_004291 | 1.352 | 0.981 | 1.39  | 0.479 | 1.135 | 0.545 | 1.859 | 0.417 | Signal transduction. Neuropeptide signaling pathway. Cell-cell signaling. Synaptic transmission.       |
| FRAS1     | Fraser syndrome 1 isoform 1                                     | NM_025074 |       |       | 2.758 | 0.617 | 1.622 | 0.591 |       |       | Cell communication.                                                                                    |
| GUCY1B2   | * guanylate cyclase 1, soluble, beta 2*                         | NM_004129 |       |       | 1.483 | 1.12  | 1.03  | 0.749 | 1.866 | 0.293 | CGMP biosynthesis. Intracellular signaling cascade.                                                    |
| AP2E      | * adaptor-related protein complex 2, epsilon subunit*           | NM_178548 |       |       | 2.901 | 0.472 |       |       | 1.476 | 0.628 |                                                                                                        |
| DACH1     | dachshund homolog 1 isoform a                                   | NM_080759 |       |       | 3.254 | 0.991 | 1.116 | 0.945 |       |       | Transcription. Regulation of transcription, DNA-dependent. Development. Eye morphogenesis.             |
| N/A       | unknown                                                         | AF466366  |       |       | 1.602 | 0.721 | 1.377 | 0.613 | 1.39  | 0.466 |                                                                                                        |
| N/A       | N/A                                                             | AK130688  |       |       | 1.521 | 0.429 | 1.155 | 0.349 | 1.692 | 0.421 |                                                                                                        |
| N/A       | thrombospondin                                                  | AF251057  |       |       | 2.135 | 0.815 | 1.226 | 0.605 | 1.007 | 0.55  | Electron transport.                                                                                    |
| SLC13A2   | * solute carrier family 13 (sodium-dependent dicarboxylate tra  | NM_003984 |       |       | 1.958 | 0.488 |       |       | 2.409 | 0.451 | Ion transport. Sodium ion transport.                                                                   |
| CITED1    | * Cbp/p300-interacting transactivator, with Glu/Asp-rich carbo  | NM_004143 |       |       | 2.977 | 1.197 | 1.388 | 0.894 |       |       | Regulation of transcription from RNA polymerase II promoter.                                           |
| KCNK4     | Shaw-related voltage-gated potassium channel protein 4 isofo    | NM_004978 |       |       | 1.175 | 0.628 | 1.889 | 1.334 | 1.287 | 1.074 | Cation transport. Potassium ion transport. Potassium ion transport. Synaptic transmission.             |
| OXT       | oxytocin-neurophysin I preproprotein                            | NM_000915 |       |       | 1.449 | 0.788 | 1.104 | 0.408 | 1.788 | 0.368 | Signal transduction. Parturition.                                                                      |
| PPP1R14C  | * protein phosphatase 1, regulatory (inhibitor) subunit 14C*    | NM_030949 |       |       | 2.265 | 1.013 |       |       | 2.072 | 0.663 |                                                                                                        |
| N/A       | unknown                                                         | AF036977  |       |       | 1.122 | 0.498 | 1.169 | 0.226 | 2.046 | 0.72  |                                                                                                        |
| COMP      | COMP protein                                                    | BC033676  |       |       | 1.606 | 0.543 | 1.376 | 0.352 | 1.352 | 0.481 | Skeletal development. Cell adhesion.                                                                   |
| KRTHA5    | type I hair keratin 5                                           | NM_002280 |       |       | 2.16  | 0.613 |       |       | 2.174 | 0.474 | Morphogenesis.                                                                                         |
| NEURL     | neurularized-like                                               | NM_004210 |       |       | 1.864 | 0.839 | 1.307 | 0.768 | 1.161 | 0.623 | Neurogenesis. Protein ubiquitination.                                                                  |
| HPCAL4    | hippocalcin-like protein 4                                      | BC030827  |       |       | 1.359 | 0.783 | 1.454 | 0.369 | 1.514 | 0.351 | Central nervous system development.                                                                    |
| DGKG      | * diacylglycerol kinase, gamma 90kDa*                           | NM_001346 |       |       | 1.498 | 0.857 | 1.363 | 0.515 | 1.465 | 0.436 | Protein kinase C activation. Intracellular signaling cascade.                                          |
| MAL       | * T-lymphocyte maturation-associated protein, isoform a*        | BC000458  |       |       | 1.468 | 0.47  | 1.336 | 0.507 | 1.517 | 0.823 | Signal transduction. Central nervous system development. Hemocyte development.                         |
| STAC      | SH3 and cysteine rich domain                                    | NM_003149 |       |       | 1.323 | 0.49  | 1.363 | 0.512 | 1.634 | 0.397 | Intracellular signaling cascade.                                                                       |
| CCNA1     | cyclin A1                                                       | NM_003914 |       |       | 2.123 | 0.561 | 1.182 | 0.44  | 1.014 | 0.476 | Regulation of cyclin dependent protein kinase activity. Cytokinesis. Mitosis. Meiosis. Male meiosis I. |
| N/A       | Unknown (protein for MGC:33592)                                 | BC022082  |       |       | 1.662 | 0.671 | 1.212 | 0.657 | 1.444 | 0.781 |                                                                                                        |
| C13orf18  | C13orf18 protein                                                | BC032311  |       |       | 1.329 | 0.397 | 1.271 | 0.584 | 1.715 | 0.882 |                                                                                                        |
| KIAA0273  | N/A                                                             | D87463    |       |       | 1.128 | 0.517 | 1.144 | 0.511 | 2.036 | 0.568 |                                                                                                        |
| TUB       | tubby isoform a                                                 | NM_003320 |       |       | 1.74  | 1.168 |       |       | 2.567 | 0.514 |                                                                                                        |
| ITGA8     | * integrin, alpha 8*                                            | NM_003638 |       |       | 2.033 | 1.004 | 1.217 | 0.76  | 1.056 | 0.473 | Cell-matrix adhesion. Integrin-mediated signaling pathway. Cell-cell adhesion.                         |
| ZNF80     | zinc finger protein 80 (pT17)                                   | NM_007136 |       |       | 2.461 | 0.971 |       |       | 1.843 | 0.996 | Transcription. Regulation of transcription, DNA-dependent.                                             |
| FLJ45803  | FLJ45803 protein                                                | NM_207429 |       |       | 2.292 | 0.653 |       |       | 2.009 | 0.792 |                                                                                                        |
| ADAMTS18  | * a disintegrin-like and metalloprotease (reprolysin type) with | NM_199355 |       |       | 2.068 | 0.626 |       |       | 2.225 | 0.771 | Proteolysis and peptidolysis.                                                                          |
| N/A       | N/A                                                             | AK123485  |       |       | 1.797 | 0.67  | 1.355 | 0.546 | 1.138 | 0.352 |                                                                                                        |
| COL23A1   | * collagen, type XXIII, alpha 1*                                | NM_173465 |       |       | 1.083 | 0.631 | 1.328 | 0.784 | 1.879 | 0.327 | Phosphate transport. Cell adhesion.                                                                    |
| LOC200420 | LOC200420                                                       | NM_145300 |       |       | 1.731 | 0.856 |       |       | 2.548 | 0.549 |                                                                                                        |
| N/A       | N/A                                                             | AK126812  |       |       | 1.142 | 0.65  | 1.239 | 0.435 | 1.891 | 0.441 |                                                                                                        |
| KL        | klotho isoform b                                                | NM_153683 |       |       | 1.799 | 0.428 | 1.168 | 0.387 | 1.305 | 0.393 | Carbohydrate metabolism.                                                                               |
| CRMP1     | collapsin response mediator protein 1                           | NM_001313 |       |       | 2.095 | 1.324 |       |       | 2.176 | 1.086 | Nucleobase, nucleoside, nucleotide and nucleic acid metabolism. Neurogenesis.                          |
| N/A       | N/A                                                             | AK056971  | 1.085 | 0.796 | 1.728 | 0.463 | 1.073 | 0.508 | 1.469 | 0.51  |                                                                                                        |
| MYCN      | * v-myc myelocytomatosis viral related oncogene, neuroblasto    | NM_005378 |       |       | 1.346 | 0.678 | 1.241 | 0.625 | 1.674 | 0.523 | Regulation of transcription from RNA polymerase II promoter.                                           |
| PITPNM3   | PITPNM family member 3                                          | NM_031220 |       |       | 1.512 | 0.778 | 1.397 | 0.997 | 1.348 | 0.499 | Phosphoinositide metabolism.                                                                           |
| N/A       | unknown                                                         | AF450484  |       |       | 1.686 | 0.395 | 1.227 | 0.468 | 1.341 | 0.617 |                                                                                                        |
| GSCL      | goosecoid-like                                                  | NM_005315 |       |       | 1.146 | 1.072 | 1.253 | 0.691 | 1.854 | 1.05  | Regulation of transcription from RNA polymerase II promoter. Morphogenesis.                            |
| N/A       | N/A                                                             | AK126852  |       |       | 2.619 | 0.525 |       |       | 1.63  | 0.782 |                                                                                                        |
| N/A       | N/A                                                             | BC038293  |       |       | 2.808 | 0.37  |       |       | 1.44  | 0.799 |                                                                                                        |
| COL4A3    | * alpha 3 type IV collagen isoform 1, precursor*                | NM_000091 |       |       | 1.829 | 0.664 | 1.336 | 0.422 | 1.082 | 0.507 |                                                                                                        |
| C14orf8   | chromosome 14 open reading frame 8                              | NM_173846 |       |       | 1.466 | 0.491 |       |       | 2.779 | 0.741 |                                                                                                        |
| FLJ20152  | hypothetical protein FLJ20152                                   | NM_019000 |       |       | 1.676 | 0.494 | 1.413 | 0.387 | 1.151 | 0.55  |                                                                                                        |
| N/A       | N/A                                                             | AK126160  |       |       | 1.992 | 0.61  |       |       | 2.247 | 0.72  | Proteolysis and peptidolysis. Protein catabolism.                                                      |

|               |                                                                      |           |       |       |       |       |       |       |                                                                                                                             |
|---------------|----------------------------------------------------------------------|-----------|-------|-------|-------|-------|-------|-------|-----------------------------------------------------------------------------------------------------------------------------|
| DKFZp451C1317 | hypothetical proteincDNA DKFZp451C1317 (from clone DKFZ) AL832601    |           | 1.26  | 0.398 | 1.434 | 0.434 | 1.545 | 0.509 |                                                                                                                             |
| N/A           | N/A                                                                  | AK130282  | 1.338 | 0.337 | 1.284 | 0.197 | 1.611 | 0.187 |                                                                                                                             |
| KIAA0367      | N/A                                                                  | AB002365  | 1.589 | 0.603 |       |       | 2.641 | 0.669 | Apoptosis.                                                                                                                  |
| EMILIN3       | elastin microfibril interfacier 3                                    | NM_052846 | 1.069 | 0.642 | 1.21  | 0.929 | 1.948 | 1.073 |                                                                                                                             |
| LOC145741     | hypothetical LOC145741                                               | NM_207322 | 2.733 | 0.388 |       |       | 1.49  | 0.489 |                                                                                                                             |
| N/A           | STRA6                                                                | AY358748  | 2.038 | 1.007 |       |       | 2.184 | 0.57  |                                                                                                                             |
| RASGRF1       | Ras protein-specific guanine nucleotide-releasing factor 1 isoform 1 | NM_002891 | 1.199 | 0.333 | 1.194 | 0.371 | 1.827 | 0.604 | Small GTPase mediated signal transduction. Long-term memory.                                                                |
| TCF7          | * transcription factor 7 (T-cell specific, HMG-box) isoform 1*       | NM_003202 | 1.184 | 0.519 | 1.079 | 0.458 | 1.953 | 0.583 | Transcription. Regulation of transcription, DNA-dependent. Immune response.                                                 |
| WFDC2         | WAP four-disulfide core domain 2 isoform 3 precursor                 | NM_080733 |       |       | 2.101 | 0.664 | 2.113 | 0.722 | Proteolysis and peptidolysis. Spermatogenesis.                                                                              |
| N/A           | peptide YY precursor                                                 | D13902    |       |       | 1.196 | 0.556 | 1.586 | 0.36  | Cell motility. Cytoskeleton organization and biogenesis. Cell-cell signaling. Digestion.                                    |
| N/A           | putative tumor suppressor gene 26 protein alpha 2 delta calciu       | AF040709  | 1.152 | 0.758 | 1.343 | 0.632 | 1.718 | 0.935 | Ion transport. Calcium ion transport.                                                                                       |
| KIAA1855      | KIAA1855 protein                                                     | AB058758  | 1.983 | 0.707 |       |       | 2.229 | 0.713 | Protein amino acid phosphorylation.                                                                                         |
| N/A           | N/A                                                                  | AK128290  | 1.172 | 0.482 | 1.182 | 0.691 | 1.85  | 0.606 |                                                                                                                             |
| CECR6         | * cat eye syndrome chromosome region, candidate 6*                   | NM_031890 | 1.021 | 1.046 | 1.361 | 0.768 | 1.814 | 1.068 |                                                                                                                             |
| SLC22A7       | solute carrier family 22 member 7 isoform b                          | NM_153320 | 1.286 | 0.74  | 1.07  | 0.448 | 1.838 | 0.332 | Ion transport. Sodium ion transport. Organic anion transport.                                                               |
| GFRA2         | GDNF family receptor alpha 2 preproprotein                           | NM_001495 | 1.609 | 1.401 | 1.341 | 1.124 | 1.243 | 0.645 | Transmembrane receptor protein tyrosine kinase signaling pathway.                                                           |
| KIAA0437      | N/A                                                                  | AB007897  | 2.147 | 1.244 | 1.037 | 0.655 | 1.008 | 0.607 |                                                                                                                             |
| EDARADD       | EDAR-associated death domain isoform B                               | NM_080738 | 1.663 | 1.106 | 1.199 | 0.95  | 1.329 | 0.644 |                                                                                                                             |
| N/A           | Unknown (protein for MGC:11077)                                      | BC006530  | 1.328 | 0.318 | 1.362 | 0.508 | 1.495 | 0.33  |                                                                                                                             |
| RHCG          | * Rhesus blood group, C glycoprotein*                                | BC030965  | 1.352 | 0.54  | 1.248 | 0.473 | 1.584 | 0.644 | Transport. Ammonium transport.                                                                                              |
| LHX6          | LIM homeobox protein 6 isoform 1                                     | NM_014368 | 2.44  | 0.645 |       |       | 1.74  | 0.85  | Regulation of transcription, DNA-dependent. Brain development.                                                              |
| GAS2          | GAS2 protein                                                         | BC013326  | 2.51  | 0.788 |       |       | 1.667 | 0.577 | Cellular morphogenesis. Apoptosis. Cell cycle. Cell cycle arrest.                                                           |
| N/A           | N/A                                                                  | AK123049  | 2.625 | 0.481 |       |       | 1.551 | 0.37  |                                                                                                                             |
| FLJ00138      | FLJ00138 protein                                                     | AK074067  | 1.697 | 1.157 | 1.329 | 0.899 | 1.148 | 0.793 | Intracellular signaling cascade.                                                                                            |
| N/A           | PRSS22                                                               | AY358396  | 1.078 | 0.653 | 1.411 | 0.629 | 1.684 | 0.66  | Proteolysis and peptidolysis.                                                                                               |
| CNTNAP3       | cell recognition molecule CASPR3                                     | NM_033655 | 1.07  | 0.262 | 1.333 | 0.658 | 1.76  | 0.521 | Cell adhesion. Cell recognition.                                                                                            |
| POU4F1        | * POU domain, class 4, transcription factor 1*                       | NM_006237 | 2.821 | 0.81  |       |       | 1.334 | 0.585 | Regulation of transcription from RNA polymerase II promoter. Development. Axonogenesis. Synaptogenesis.                     |
| LOC284013     | secretory protein LOC284013                                          | NM_182566 | 1.819 | 0.479 | 1.11  | 0.243 | 1.226 | 0.597 |                                                                                                                             |
| GPR103        | G protein-coupled receptor 103                                       | NM_198179 | 1.092 | 0.451 | 1.641 | 0.59  | 1.422 | 0.725 |                                                                                                                             |
| CFC1          | cryptic                                                              | NM_032545 | 2.123 | 0.975 |       |       | 2.029 | 0.488 |                                                                                                                             |
| S100B         | * S100 calcium-binding protein, beta*                                | NM_006272 | 1.682 | 0.837 | 1.099 | 0.96  | 1.37  | 0.741 | Energy reserve metabolism. Calcium ion homeostasis. Induction of apoptosis. Axonogenesis.                                   |
| DKFZp761H039  | hypothetical protein DKFZp761H039                                    | NM_018711 |       |       | 1.337 | 0.818 | 2.805 | 0.227 | Ion transport.                                                                                                              |
| GALNT9        | polypeptide N-acetylgalactosaminyltransferase 9                      | NM_021808 | 1.195 | 0.358 | 1.141 | 0.739 | 1.804 | 0.596 | O-linked glycosylation.                                                                                                     |
| RANBP2L1      | RAN-binding protein 2-like 1 isoform 2                               | NM_032260 | 2.216 | 0.27  |       |       | 1.911 | 0.461 |                                                                                                                             |
| NKD1          | naked cuticle homolog 1                                              | NM_033119 | 1.714 | 0.618 | 1.389 | 0.721 | 1.021 | 0.627 |                                                                                                                             |
| PSD2          | pleckstrin and Sec7 domain containing 2                              | NM_032289 | 1.225 | 1.074 | 1.078 | 0.607 | 1.82  | 1.222 |                                                                                                                             |
| CUTL2         | cut-like 2                                                           | NM_015267 | 1.169 | 0.539 | 1.77  | 0.925 | 1.182 | 0.489 | Regulation of transcription, DNA-dependent.                                                                                 |
| N/A           | Unknown (protein for IMAGE:4798313)                                  | BC030761  | 1.321 | 0.927 | 1.015 | 0.955 | 1.778 | 0.626 |                                                                                                                             |
| APOBEC3A      | phorbol 1                                                            | NM_145699 | 1.911 | 0.968 |       |       | 2.191 | 0.666 | Protein amino acid phosphorylation. Signal transduction. Alcohol metabolism. Lipid metabolism. Metabolism.                  |
| NPHS2         | podocin                                                              | NM_014625 | 1.181 | 1.11  | 1.439 | 0.69  | 1.476 | 0.671 | Excretion.                                                                                                                  |
| N/A           | LP6728                                                               | AY203947  | 1.854 | 0.544 |       |       | 2.241 | 0.576 |                                                                                                                             |
| PMP22         | peripheral myelin protein 22                                         | NM_000304 | 2.323 | 0.509 |       |       | 1.772 | 0.505 | Synaptic transmission. Peripheral nervous system development. Perception of sound. Mechanosensory behavior.                 |
| FKSG58        | FKSG58                                                               | AF336885  | 2.319 | 0.804 |       |       | 1.775 | 0.445 |                                                                                                                             |
| GNAO1         | GNAO1 protein                                                        | BC030027  | 1.252 | 0.487 | 1.453 | 0.678 | 1.387 | 0.615 | Muscle contraction. Signal transduction. G-protein coupled receptor protein signaling pathway. Neurogenesis. Axon guidance. |
| N/A           | N/A                                                                  | AK092418  | 1.667 | 0.352 |       |       | 2.425 | 0.324 |                                                                                                                             |
| MEGF4         | MEGF4                                                                | AB011537  |       |       | 1.753 | 0.7   | 2.336 | 0.578 |                                                                                                                             |
| N/A           | HCTP4-binding protein                                                | AY390431  |       |       | 1.918 | 0.852 | 2.17  | 1.041 |                                                                                                                             |
| N/A           | N/A                                                                  | AK092393  | 2.756 | 0.632 | 1.324 | 0.435 |       |       |                                                                                                                             |
| N/A           | N/A                                                                  | AK125833  | 1.137 | 0.517 | 1.139 | 0.605 | 1.798 | 0.507 |                                                                                                                             |
| DPYS          | dihydropyrimidinase                                                  | NM_001385 | 1.24  | 0.591 | 1.061 | 0.635 | 1.752 | 0.841 | Nucleobase, nucleoside, nucleotide and nucleic acid metabolism. Response to toxin.                                          |
| FLT3          | fms-related tyrosine kinase 3                                        | NM_004119 | 1.878 | 0.728 | 1.034 | 0.439 | 1.16  | 0.847 | Protein amino acid phosphorylation. Positive regulation of cell proliferation.                                              |
| PACSIN1       | PACSIN1 protein                                                      | BC040228  |       |       | 1.445 | 0.571 | 2.626 | 0.522 | Endocytosis.                                                                                                                |
| LOC283439     | hypothetical protein LOC283439                                       | NM_199460 | 2.454 | 0.742 |       |       | 1.612 | 0.891 |                                                                                                                             |
| NGFR          | * nerve growth factor receptor, precursor*                           | BC050309  | 1.501 | 0.563 | 1.014 | 0.622 | 1.55  | 0.872 | Apoptosis. Signal transduction. Neurogenesis. Cell differentiation.                                                         |
| N/A           | HSPC080                                                              | AF161343  |       |       | 1.321 | 0.633 | 2.743 | 0.798 | Protein amino acid phosphorylation. Signal transduction. Alcohol metabolism. Lipid metabolism.                              |
| MGC4766       | testis-specific protein TES101RP                                     | NM_031451 | 1.659 | 0.204 |       |       | 2.404 | 0.426 |                                                                                                                             |

|               |                                                                  |              |       |       |       |       |       |       |                                                                                                            |
|---------------|------------------------------------------------------------------|--------------|-------|-------|-------|-------|-------|-------|------------------------------------------------------------------------------------------------------------|
| N/A           | N/A                                                              | AK125190     | 2.335 | 0.41  |       |       | 1.724 | 0.508 |                                                                                                            |
| NINJ2         | ninjurin 2                                                       | NM_016533    | 2.155 | 0.765 |       |       | 1.903 | 0.775 | Cell adhesion. Neuronal cell adhesion. Neurogenesis. Tissue regeneration.                                  |
| GDF2          | growth differentiation factor 2                                  | NM_016204    | 1.686 | 0.779 |       |       | 2.372 | 0.432 | Growth.                                                                                                    |
| FLJ46354      | FLJ46354 protein                                                 | NM_198547    | 1.627 | 0.485 | 1.063 | 0.345 | 1.368 | 0.394 | Mitotic chromosome condensation.                                                                           |
| B3GNT3        | beta-1,3-N-acetylglucosaminyltransferase bGnT-3*                 | NM_014256    |       |       |       | 1.749 | 0.869 | 2.306 | Protein amino acid glycosylation.                                                                          |
| FLJ00202      | FLJ00202 protein                                                 | AK122580     | 1.606 | 0.595 |       |       | 2.444 | 0.464 | Metabolism.                                                                                                |
| FLJ00330      | FLJ00330 protein                                                 | AK090421     | 1.017 | 0.662 | 1.145 | 0.604 | 1.884 | 0.649 |                                                                                                            |
| TNFSF8        | * tumor necrosis factor (ligand) superfamily, member 8*          | NM_001244    | 2.396 | 0.589 |       |       | 1.648 | 0.479 | Induction of apoptosis. Immune response. Signal transduction. Cell-cell signaling. Cell proliferation.     |
| PDGFB         | c-sis/platelet-derived growth factor 2                           | M12783       | 1.433 | 0.922 | 1.021 | 0.798 | 1.584 | 0.47  |                                                                                                            |
| KIAA1013      | KIAA1013 protein                                                 | AB023230     | 1.29  | 0.525 | 1.076 | 0.461 | 1.664 | 0.346 |                                                                                                            |
| N/A           | N/A                                                              | AK130422     | 1.013 | 0.516 | 1.17  | 0.544 | 1.847 | 0.536 |                                                                                                            |
| DKK-2         | dickkopf-2                                                       | AF177395     | 2.592 | 0.678 |       |       | 1.434 | 0.855 | Development. Negative regulation of Wnt receptor signaling pathway.                                        |
| OR6B3         | * olfactory receptor, family 6, subfamily B, member 3*           | NM_173351    | 1.1   | 0.688 |       |       | 2.921 | 0.58  |                                                                                                            |
| N/A           | interferon                                                       | V00541       | 2.065 | 0.541 |       |       | 1.956 | 0.361 | Defense response.                                                                                          |
| KIAA1119      | KIAA1119 protein                                                 | AB032945     | 2.42  | 1.439 |       |       | 1.601 | 0.992 |                                                                                                            |
| ADD2          | adducin 2 isoform e                                              | NM_017488    | 1.396 | 1.12  | 1.089 | 0.765 | 1.535 | 0.451 |                                                                                                            |
| PDE8B         | * 3',5' cyclic nucleotide phosphodiesterase 8B*                  | NM_003719    | 1.746 | 0.721 | 1.028 | 0.509 | 1.233 | 0.694 | Signal transduction. Cyclic nucleotide metabolism.                                                         |
| RPP25         | ribonuclease P 25kDa subunit                                     | NM_017793    | 1.494 | 0.347 | 1.123 | 0.678 | 1.386 | 0.82  |                                                                                                            |
| OTOP1         | otopetrin 1                                                      | NM_177998    |       |       | 1.896 | 0.538 | 2.099 | 0.483 |                                                                                                            |
| TNFRSF9       | * tumor necrosis factor receptor superfamily, member 9 precursor | NM_001561    | 2.575 | 0.339 |       |       | 1.419 | 0.248 | Induction of apoptosis. Immune response. Negative regulation of cell proliferation.                        |
| KRTHA2        | type I hair keratin 2                                            | NM_002278    | 1.978 | 0.474 |       |       | 2.01  | 0.468 | Epidermis development.                                                                                     |
| FLJ42133      | hypothetical FLJ42133                                            | NM_001001690 | 1.687 | 1.277 |       |       | 2.294 | 0.936 | Protein amino acid phosphorylation. Signal transduction. Alcohol metabolism. Lipid metabolism. Metabolism. |
| MSMB          | beta-microseminoprotein isoform a precursor                      | NM_002443    | 1.195 | 1.545 | 2.08  | 0.307 | 1.899 | 0.458 |                                                                                                            |
| TGM7          | transglutaminase 7                                               | NM_052955    | 2.202 | 0.615 |       |       | 1.773 | 0.495 | Peptide cross-linking.                                                                                     |
| N/A           | KTSR5831                                                         | AY358206     | 1.666 | 0.905 | 1.012 | 0.381 | 1.292 | 0.995 |                                                                                                            |
| BAMBI         | BMP and activin membrane-bound inhibitor                         | NM_012342    | 2.732 | 1.641 |       |       | 1.23  | 0.823 |                                                                                                            |
| LOC286359     | hypothetical protein LOC286359                                   | NM_182600    | 1.499 | 0.236 | 2.308 | 0.647 | 1.653 | 0.235 |                                                                                                            |
| LOC146206     | LOC146206 protein                                                | BC043154     | 1.087 | 0.526 | 1.067 | 0.274 | 1.807 | 0.686 |                                                                                                            |
| CHRNB4        | * cholinergic receptor, nicotinic, beta polypeptide 4*           | NM_000750    | 1.302 | 0.672 | 1.08  | 0.571 | 1.578 | 0.75  | Ion transport. Signal transduction. Synaptic transmission.                                                 |
| SFTPC         | * surfactant, pulmonary-associated protein C*                    | NM_003018    | 1.807 | 0.735 |       |       | 2.152 | 0.394 | Respiratory gaseous exchange. Regulation of liquid surface tension.                                        |
| DKFZp434B1231 | eEF1A2 binding protein                                           | NM_178275    | 1.179 | 0.922 |       |       | 2.78  | 0.493 | Striated muscle contraction. Cell adhesion. Muscle development.                                            |
| DNAJB8        | * DnaJ homolog, subfamily B, member 8*                           | NM_153330    | 1.709 | 0.477 |       |       | 2.248 | 0.497 | Protein folding.                                                                                           |
| B3GNT7        | * UDP-GlcNAc:betaGal beta-1,3-N-acetylglucosaminyltransferase    | NM_145236    | 1.27  | 0.575 | 1.289 | 0.485 | 1.395 | 0.821 | Protein amino acid glycosylation.                                                                          |
| C10orf49      | chromosome 10 open reading frame 49                              | NM_145314    | 2.168 | 0.767 |       |       | 1.783 | 0.72  |                                                                                                            |
| CRHR1         | corticotropin releasing hormone receptor 1                       | NM_004382    | 1.078 | 0.52  | 1.425 | 0.624 | 1.438 | 0.647 | Immune response. Signal transduction. G-protein coupled receptor protein signaling pathway.                |
| FLJ38379      | hypothetical protein FLJ38379                                    | NM_178530    | 1.863 | 0.3   |       |       | 2.077 | 0.572 |                                                                                                            |
| IL17E         | interleukin 17E isoform 1 precursor                              | NM_022789    | 1.801 | 0.503 |       |       | 2.138 | 0.417 | Inflammatory response.                                                                                     |
| ZAN           | zonadhesin isoform 1                                             | NM_173055    | 1.755 | 0.387 |       |       | 2.183 | 0.377 | Cell adhesion. Binding of sperm to zona pellucida. Binding of sperm to zona pellucida. Cell recognition.   |
| TECTA         | tectorin alpha precursor                                         | NM_005422    | 1.583 | 0.58  |       |       | 2.351 | 0.509 | Cell-matrix adhesion. Perception of sound.                                                                 |
| N/A           | N/A                                                              | AK123428     | 1.128 | 0.452 | 1.623 | 0.661 | 1.183 | 0.53  |                                                                                                            |
| GPR144        | G protein-coupled receptor 144                                   | NM_182611    | 1.023 | 0.471 | 1.211 | 0.865 | 1.697 | 0.618 | Signal transduction. Neuropeptide signaling pathway.                                                       |
| GCKR          | glucokinase regulatory protein                                   | NM_001486    | 2.546 | 1.317 |       |       | 1.381 | 0.63  |                                                                                                            |
| C18orf1       | chromosome 18 open reading frame 1 isoform gamma 1               | NM_001003674 | 1.238 | 0.702 | 1.102 | 0.455 | 1.587 | 0.578 |                                                                                                            |
| MDF1          | MyoD family inhibitor                                            | BC007836     | 1.048 | 0.506 | 1.589 | 0.635 | 1.284 | 0.535 | Embryonic development. Cell differentiation. Cytoplasmic sequestering of transcription factor.             |
| GALGT2        | * sda beta-1,4-GalNAc transferase*                               | AJ517770     | 1.575 | 0.463 | 1.121 | 0.638 | 1.222 | 0.594 |                                                                                                            |
| LOC374946     | hypothetical gene supported by AK075558Homo sapiens hypo         | NM_198545    | 1.063 | 0.585 | 1.077 | 0.497 | 1.777 | 0.715 |                                                                                                            |
| c-erbB-3      | ErbB-3 R35                                                       | U88360       | 1.66  | 0.249 |       |       | 2.257 | 0.366 |                                                                                                            |
| HPSE2         | heparanase 2                                                     | NM_021828    | 1.651 | 0.469 |       |       | 2.264 | 0.516 |                                                                                                            |
| PPP2R2C       | * gamma isoform of regulatory subunit B55, protein phosphata     | NM_020416    | 1.332 | 0.766 | 1.062 | 0.52  | 1.52  | 0.975 | Signal transduction.                                                                                       |
| MGC26733      | hypothetical protein MGC26733                                    | NM_144992    | 2.571 | 0.948 |       |       | 1.343 | 0.73  | Protein amino acid phosphorylation. Signal transduction. Alcohol metabolism. Lipid metabolism.             |
| N/A           | hypothetical protein                                             | AJ291678     | 1.706 | 0.386 |       |       | 2.205 | 0.352 |                                                                                                            |
| SLC26A9       | * solute carrier family 26, member 9 isoform a*                  | NM_052934    | 1.434 | 0.873 |       |       | 2.475 | 0.372 | Sulfate transport.                                                                                         |
| PDE2A         | * phosphodiesterase 2A, cGMP-stimulated*                         | NM_002599    | 1.385 | 0.445 |       |       | 2.522 | 0.65  | Signal transduction.                                                                                       |
| LHX4          | LIM homeobox protein 4                                           | NM_033343    | 2.771 | 0.963 | 1.132 | 0.969 |       |       |                                                                                                            |
| LOR           | loricin                                                          | NM_000427    |       |       | 1.639 | 0.698 | 2.263 | 0.473 |                                                                                                            |
| N/A           | N/A                                                              | AK094090     | 1.999 | 0.732 |       |       | 1.9   | 0.435 | Electron transport. Lipid metabolism. C21-steroid hormone biosynthesis. Glucocorticoid biosynthesis.       |



|              |                                                                                  |              |       |       |       |       |       |       |                                                                                                                                 |
|--------------|----------------------------------------------------------------------------------|--------------|-------|-------|-------|-------|-------|-------|---------------------------------------------------------------------------------------------------------------------------------|
| CY5R2        | cytochrome b5 reductase b5R.2 isoform 2                                          | NM_001001336 | 1.341 | 0.704 | 1.243 | 0.717 | 1.305 | 0.616 | Electron transport. Electron transport. Cholesterol biosynthesis.                                                               |
| PAK1         | p21-activated kinase 1                                                           | NM_002576    | 2.422 | 0.536 |       |       | 1.461 | 0.93  | Protein amino acid phosphorylation. Protein amino acid phosphorylation. Apoptosis. JNK cascade.                                 |
| IL20RA       | * interleukin 20 receptor, alpha*                                                | NM_014432    | 2.607 | 0.414 |       |       | 1.272 | 0.197 | Blood coagulation.                                                                                                              |
| RAMP2        | receptor (calcitonin) activity modifying protein 2 precursor                     | NM_005854    | 1.312 | 0.624 | 1.027 | 0.428 | 1.539 | 0.951 | Intracellular protein transport. Receptor mediated endocytosis. Cell surface receptor linked signal transduction.               |
| N/A          | N/A                                                                              | AK091426     | 2.151 | 0.556 |       |       | 1.722 | 0.661 |                                                                                                                                 |
| POU4F3       | POU domain, class 4, transcription factor 3*                                     | NM_002700    |       |       | 1.522 | 0.34  | 2.325 | 0.508 | Eye morphogenesis. Regulation of transcription, DNA-dependent. Neurogenesis. Visual perception. Perception of sound.            |
| PTF1A        | * pancreas specific transcription factor, 1a*                                    | NM_178161    | 1.114 | 0.878 | 1.166 | 0.484 | 1.588 | 0.582 |                                                                                                                                 |
| CYS1         | cilia-associated protein                                                         | AF544983     | 1.61  | 0.537 | 1.079 | 0.331 | 1.178 | 0.716 |                                                                                                                                 |
| GADD45G      | * growth arrest and DNA-damage-inducible, gamma*                                 | NM_006705    | 1.4   | 0.63  | 1.09  | 0.489 | 1.374 | 0.643 | Activation of MAPKKK. DNA repair. Apoptosis. Response to stress. Cell differentiation.                                          |
| GF11         | growth factor independent 1                                                      | NM_005263    | 2.818 | 0.539 |       |       | 1.045 | 0.541 | G1/S-specific transcription in mitotic cell cycle. Transcription. Regulation of transcription, DNA-dependent. Viral life cycle. |
| CACNG2       | voltage-dependent calcium channel gamma-2 subunit                                | NM_006078    | 1.54  | 0.905 | 1.268 | 0.687 | 1.055 | 0.395 | Ion transport. Calcium ion transport.                                                                                           |
| N/A          | N/A                                                                              | AK128759     | 2.055 | 0.981 |       |       | 1.804 | 0.585 | Protein amino acid phosphorylation. Signal transduction. Alcohol metabolism. Lipid metabolism. Metabolism.                      |
| FLJ45983     | FLJ45983 protein                                                                 | NM_207423    | 2.754 | 0.547 |       |       | 1.103 | 0.785 |                                                                                                                                 |
| FLJ30469     | FLJ30469 protein                                                                 | BC057816     | 1.842 | 0.995 |       |       | 2.013 | 0.455 |                                                                                                                                 |
| N/A          | N/A                                                                              | AK127934     | 1.666 | 0.941 |       |       | 2.188 | 0.391 |                                                                                                                                 |
| OR111        | * olfactory receptor, family 1, subfamily I, member 1*                           | NM_001004713 | 1.988 | 0.473 |       |       | 1.859 | 0.678 | Signal transduction. G-protein coupled receptor protein signaling pathway. Perception of smell.                                 |
| NPM2         | nucleoplasmin 2 variant 1                                                        | AY262113     | 1.09  | 0.449 | 1.37  | 0.465 | 1.387 | 0.355 | Chromatin remodeling. Regulation of translation. Regulation of exit from mitosis. Fertilization. Embryonic development.         |
| SLC24A5      | * solute carrier family 24 (sodium/potassium/calcium exchange)                   | NM_205850    | 2.338 | 0.814 |       |       | 1.508 | 0.741 |                                                                                                                                 |
| N/A          | N/A                                                                              | AK124493     | 1.016 | 0.566 |       |       | 2.829 | 0.562 | Protein amino acid phosphorylation. Signal transduction. Alcohol metabolism. Lipid metabolism.                                  |
| AMN          | amniotensin protein                                                              | NM_030943    | 1     | 0.548 | 1.099 | 0.401 | 1.742 | 0.41  | Development.                                                                                                                    |
| ADRA2B       | alpha-2B-adrenergic receptor                                                     | NM_000682    | 1.056 | 0.529 | 1.334 | 0.559 | 1.449 | 0.797 | Signal transduction. G-protein coupled receptor protein signaling pathway. Cell-cell signaling.                                 |
| CASQ2        | cardiac calsequestrin 2                                                          | BC022288     | 2.029 | 1.053 |       |       | 1.809 | 0.816 | Striated muscle contraction. Heart development. Muscle development.                                                             |
| FMOD         | fibromodulin precursor                                                           | NM_002023    | 2.151 | 0.786 |       |       | 1.679 | 0.687 | Transforming growth factor beta receptor complex assembly.                                                                      |
| AXIN2        | axin 2                                                                           | NM_004655    | 1.604 | 0.449 |       |       | 2.226 | 0.537 | Signal transduction. Frizzled signaling pathway. Development.                                                                   |
| SIGLEC9      | sialic acid binding Ig-like lectin 9                                             | NM_014441    | 2.103 | 0.661 |       |       | 1.718 | 1.101 | Cell adhesion.                                                                                                                  |
| UBXD3        | UBX domain containing 3                                                          | NM_152376    |       |       | 1.293 | 0.29  | 2.524 | 0.651 |                                                                                                                                 |
| CRHR2        | corticotropin releasing hormone receptor 2                                       | NM_001883    | 1.005 | 0.528 | 1.235 | 0.246 | 1.577 | 0.655 | Signal transduction. G-protein coupled receptor protein signaling pathway.                                                      |
| PDYN         | beta-neoendorphin-dynorphin prepropeptide                                        | NM_024411    | 1.964 | 0.635 |       |       | 1.846 | 0.613 | Neuropeptide signaling pathway. Synaptic transmission.                                                                          |
| LOC283868    | LOC283868 protein                                                                | BC033227     | 1.181 | 0.572 | 1.012 | 0.647 | 1.617 | 0.46  |                                                                                                                                 |
| N/A          | N/A                                                                              | AK026786     | 1.572 | 0.392 |       |       | 2.236 | 0.124 |                                                                                                                                 |
| G0S2         | putative lymphocyte G0/G1 switch gene                                            | NM_015714    | 1.197 | 0.983 | 1.115 | 0.675 | 1.496 | 0.598 | Regulation of cell cycle.                                                                                                       |
| HTR6         | 5-hydroxytryptamine (serotonin) receptor 6                                       | NM_000871    | 1.18  | 0.599 | 1.324 | 0.589 | 1.303 | 0.628 | Signal transduction. G-protein signaling, coupled to cyclic nucleotide second messenger. Synaptic transmission.                 |
| NAT8         | N-acetyltransferase 8                                                            | NM_003960    | 1.672 | 0.543 |       |       | 2.13  | 0.355 | Response to drug.                                                                                                               |
| TNFSF7       | * tumor necrosis factor ligand superfamily, member 7*                            | NM_001252    | 1.81  | 0.264 |       |       | 1.989 | 0.462 | Apoptosis. Immune response. Signal transduction. Cell-cell signaling. Cell proliferation.                                       |
| WIF1         | Wnt inhibitory factor-1 precursor                                                | NM_007191    | 2.033 | 0.406 |       |       | 1.765 | 0.403 | Signal transduction. Cell-cell signaling. Development. Wnt receptor signaling pathway.                                          |
| HMX1         | homeo box (H6 family) 1                                                          | NM_018942    | 1.053 | 0.621 | 1.149 | 0.417 | 1.596 | 0.66  | Regulation of transcription, DNA-dependent.                                                                                     |
| CELL         | carboxyl ester lipase-like protein                                               | L14813       | 1.096 | 1.477 | 1.538 | 0.492 | 2.254 | 0.528 |                                                                                                                                 |
| RARRES2      | retinoic acid receptor responder (tazarotene induced) 2                          | NM_002889    | 1.809 | 0.691 |       |       | 1.962 | 0.952 | Retinoid metabolism.                                                                                                            |
| CCR5         | chemokine (C-C motif) receptor 5                                                 | NM_000579    | 2.145 | 0.353 |       |       | 1.645 | 0.539 | G-protein coupled receptor protein signaling pathway.                                                                           |
| DKFZp568F223 | hypothetical protein cDNA DKFZp568F223 (from clone DKFZp568F223)                 | AL050056     | 1.633 | 0.812 |       |       | 2.155 | 0.667 | Microtubule-based movement. Protein polymerization.                                                                             |
| MGAT4A       | * mannosyl (alpha-1,3-)-glycoprotein beta-1,4-N-acetylglucosaminyltransferase IV | NM_012214    | 2.714 | 0.332 |       |       | 1.072 | 0.513 | Carbohydrate metabolism. N-glycan processing.                                                                                   |
| GRIA1        | * glutamate receptor, ionotropic, AMPA 1*                                        | NM_000827    | 2.09  | 0.47  |       |       | 1.69  | 0.54  | Ion transport. Potassium ion transport. Signal transduction. Synaptic transmission.                                             |
| TMOD2        | tropomodulin 2 (neuronal)                                                        | NM_014548    | 2.634 | 1.031 |       |       | 1.145 | 0.433 | Neurogenesis.                                                                                                                   |
| N/A          | N/A                                                                              | AK091259     | 1.298 | 0.351 |       |       | 2.481 | 0.437 |                                                                                                                                 |
| MGC34741     | hypothetical protein MGC34741                                                    | NM_153356    | 1.657 | 0.783 |       |       | 2.114 | 0.453 |                                                                                                                                 |
| LEMD1        | LEM domain containing 1                                                          | NM_001001552 | 1.986 | 0.535 |       |       | 1.779 | 0.456 |                                                                                                                                 |
| N/A          | N/A                                                                              | AF035316     | 1.72  | 0.719 |       |       | 2.036 | 0.652 | Microtubule-based movement. Protein polymerization.                                                                             |
| SIAT8F       | * alpha-2, 8-sialyltransferase*                                                  | NM_001004470 | 1.506 | 1.036 | 1.161 | 0.67  | 1.089 | 0.863 | Protein amino acid glycosylation.                                                                                               |
| N/A          | RhoGEF protein                                                                   | AF433662     | 1.238 | 0.538 | 1.22  | 0.312 | 1.289 | 0.701 | Rho protein signal transduction.                                                                                                |
| LOC400696    | eosinophil lysophospholipase-like                                                | NM_207646    | 2.009 | 0.67  |       |       | 1.736 | 0.611 |                                                                                                                                 |
| FLJ44186     | FLJ44186 protein                                                                 | NM_198508    | 1.203 | 0.553 | 1.289 | 0.566 | 1.245 | 0.447 |                                                                                                                                 |
| N/A          | N/A                                                                              | AK096803     | 1.651 | 0.578 |       |       | 2.081 | 0.401 |                                                                                                                                 |
| N/A          | myosin                                                                           | L29144       | 2.359 | 0.688 |       |       | 1.372 | 0.482 |                                                                                                                                 |
| KRT25C       | keratin 25C                                                                      | NM_181537    | 2.456 | 2.04  | 2.53  | 0.378 | 1.201 | 0.485 |                                                                                                                                 |
| CPA6         | carboxypeptidase B precursor                                                     | NM_020361    | 2.523 | 0.933 | 1.206 | 0.439 |       |       | Proteolysis and peptidolysis.                                                                                                   |
| ALDH3B2      | aldehyde dehydrogenase 3B2                                                       | NM_000695    | 1.686 | 0.737 |       |       | 2.043 | 0.45  | Alcohol metabolism. Lipid metabolism.                                                                                           |

|               |                                                                       |           |       |       |       |       |       |       |                                                                                                                               |
|---------------|-----------------------------------------------------------------------|-----------|-------|-------|-------|-------|-------|-------|-------------------------------------------------------------------------------------------------------------------------------|
| LMX1B         | * LIM homeobox transcription factor 1, beta*                          | NM_002316 | 1.621 | 0.698 | 1.041 | 0.484 | 1.065 | 0.681 | Embryonic development. Regulation of transcription, DNA-dependent. Dorsal/ventral pattern formation.                          |
| UPB1          | beta-ureidopropionase                                                 | NM_016327 | 1.207 | 0.736 | 1.017 | 0.731 | 1.496 | 0.314 | Nitrogen compound metabolism.                                                                                                 |
| KIAA1130      | KIAA1130 protein                                                      | AB032956  | 1.311 | 0.933 | 1.068 | 0.777 | 1.337 | 1.136 | Protein amino acid phosphorylation. Signal transduction. Alcohol metabolism. Lipid metabolism.                                |
| PAX8          | paired box gene 8 isoform PAX8A                                       | NM_003466 | 2.281 | 0.333 |       |       | 1.434 | 0.433 | GTP biosynthesis. UTP biosynthesis. CTP biosynthesis. Transcription. Regulation of transcription.                             |
| SYN3          | synapsin III isoform IIIa                                             | NM_003490 | 2.353 | 0.452 |       |       | 1.357 | 0.955 | Neurotransmitter secretion. Neurotransmitter secretion.                                                                       |
| TPPP          | brain-specific protein p25 alpha                                      | NM_007030 | 1.234 | 0.639 | 1.094 | 0.598 | 1.378 | 0.979 |                                                                                                                               |
| KRTHB3        | keratin, hair, basic, 3*                                              | NM_002282 |       |       | 1.393 | 0.361 | 2.313 | 0.378 | Epidermis development.                                                                                                        |
| STRC          | stereocilin                                                           | NM_153700 | 1.778 | 0.805 |       |       | 1.928 | 0.696 | Perception of sound.                                                                                                          |
| N/A           | hypothetical protein                                                  | AJ311357  |       |       | 1.15  | 0.579 | 2.554 | 0.345 | Transport.                                                                                                                    |
| CRYM          | * crystallin, mu"                                                     | BC018061  | 2.312 | 0.681 |       |       | 1.389 | 0.558 | Visual perception.                                                                                                            |
| TRIM31        | tripartite motif protein 31 isoform alpha                             | NM_007028 | 1.863 | 0.452 |       |       | 1.837 | 0.454 | Protein ubiquitination.                                                                                                       |
| MYOG          | myogenin                                                              | BC053899  | 1.352 | 0.631 |       |       | 2.348 | 0.562 | Regulation of transcription, DNA-dependent. Transcription from RNA polymerase II promoter. Myogenesis. Cell differentiation.  |
| FBP1          | * fructose-1,6-bisphosphatase 1*                                      | NM_000507 | 1.081 | 0.637 | 1.305 | 0.558 | 1.311 | 0.307 | Carbohydrate metabolism. Fructose metabolism. Gluconeogenesis.                                                                |
| KIAA0167      | KIAA0167 protein                                                      | D79989    | 2.394 | 0.567 |       |       | 1.302 | 0.577 | Signal transduction. Small GTPase mediated signal transduction.                                                               |
| KIAA1006      | KIAA1006 protein                                                      | AB023223  | 1.332 | 0.383 |       |       | 2.355 | 1.149 | Vesicle-mediated transport.                                                                                                   |
| PLP1          | proteolipid protein 1 isoform 1                                       | NM_000533 | 1.993 | 0.932 |       |       | 1.69  | 0.617 |                                                                                                                               |
| PGF           | * placental growth factor, vascular endothelial growth factor-related | NM_002632 | 1.121 | 1.033 | 1.088 | 0.72  | 1.452 | 0.59  | Regulation of cell cycle. Angiogenesis. Signal transduction. Cell-cell signaling. Cell proliferation.                         |
| FCGR2B        | * Fc fragment of IgG, low affinity IIb, receptor for (CD32) isoform   | NM_004001 | 1.553 | 0.364 |       |       | 2.108 | 0.406 | Immune response.                                                                                                              |
| PCDH21        | protocadherin 21 precursor                                            | NM_033100 | 1.287 | 0.864 | 1.027 | 0.347 | 1.343 | 0.503 | Homophilic cell adhesion.                                                                                                     |
| N/A           | N/A                                                                   | AK126716  |       |       | 1.208 | 0.404 | 2.448 | 0.902 | Germ cell development. Embryonic development. RNA interference.                                                               |
| NPPB          | natriuretic peptide precursor B                                       | NM_002521 |       |       | 1.624 | 0.489 | 2.03  | 0.381 | Signal transduction. Fluid secretion. Regulation of blood pressure. Negative regulation of angiogenesis.                      |
| PLA2G2A       | * phospholipase A2, group IIA*                                        | NM_000300 | 1.377 | 1.001 |       |       | 2.273 | 0.444 | Lipid catabolism.                                                                                                             |
| KCNK4         | potassium channel, subfamily K, member 4 isoform 1*                   | NM_016611 |       |       | 1.765 | 0.593 | 1.881 | 0.681 | Potassium ion transport.                                                                                                      |
| SMO           | smoothened                                                            | NM_005631 | 2.252 | 1.089 |       |       | 1.391 | 0.832 | G-protein coupled receptor protein signaling pathway. Development.                                                            |
| MT3           | metallothionein 3                                                     | NM_005954 | 1.522 | 0.456 |       |       | 2.121 | 0.422 | Response to hypoxia. Metal ion homeostasis. Removal of superoxide radicals. Negative regulation of cell growth.               |
| ANGPT4        | angiopoietin 4                                                        | NM_015985 | 1.107 | 1.941 | 1.738 | 0.854 | 1.905 | 0.381 |                                                                                                                               |
| THRB          | * thyroid hormone receptor, beta*                                     | NM_000461 | 1.049 | 0.244 | 1.188 | 0.422 | 1.405 | 0.7   | Regulation of transcription, DNA-dependent. Perception of sound.                                                              |
| WFDC5         | WAP four-disulfide core domain 5 precursor                            | NM_145652 | 1.512 | 0.804 |       |       | 2.129 | 0.438 |                                                                                                                               |
| N/A           | N/A                                                                   | AK075214  | 1.571 | 0.659 |       |       | 2.069 | 0.675 | Cell cycle.                                                                                                                   |
| KCNA6         | * potassium voltage-gated channel, shaker-related subfamily, I        | NM_002235 | 1.029 | 0.536 | 1.06  | 0.597 | 1.55  | 0.4   | Cation transport. Potassium ion transport.                                                                                    |
| RGS8          | regulator of G-protein signalling 8                                   | NM_033345 | 1.525 | 0.595 |       |       | 2.114 | 0.435 | Signal transduction.                                                                                                          |
| FLJ21511      | hypothetical protein FLJ21511                                         | NM_025087 | 1.165 | 0.587 | 1.315 | 0.437 | 1.157 | 0.478 |                                                                                                                               |
| CACNA1E       | calcium channel, voltage-dependent, alpha 1E subunit*                 | NM_000721 |       |       | 1.13  | 0.406 | 2.507 | 0.601 | Calcium ion transport. Synaptic transmission.                                                                                 |
| FLJ14050      | hypothetical protein FLJ14050                                         | NM_024869 | 1.824 | 0.792 |       |       | 1.809 | 0.579 |                                                                                                                               |
| N/A           | N/A                                                                   | AK095622  | 1.686 | 0.359 |       |       | 1.946 | 0.593 |                                                                                                                               |
| PTPN3         | PTPN3 protein                                                         | BC063287  | 1.369 | 0.84  | 1.128 | 0.908 | 1.133 | 1.019 |                                                                                                                               |
| CRYGC         | * crystallin, gamma C"                                                | NM_020989 | 2.602 | 0.517 |       |       | 1.026 | 0.307 |                                                                                                                               |
| DCNP1         | dendritic cell nuclear protein 1                                      | NM_130848 | 1.784 | 0.8   |       |       | 1.841 | 0.399 |                                                                                                                               |
| ENPP2         | ectonucleotide pyrophosphatase/phosphodiesterase 2 (autotaxin)        | NM_006209 | 2.428 | 0.397 | 1.196 | 0.512 |       |       | Phosphate metabolism. Cell motility. Chemotaxis. G-protein coupled receptor protein signaling pathway. Nucleotide metabolism. |
| CELSR1        | cadherin EGF LAG seven-pass G-type receptor 1                         | NM_014246 | 1.274 | 0.774 | 1.286 | 0.956 | 1.062 | 0.712 | Cell adhesion. Homophilic cell adhesion. Signal transduction. Neuropeptide signaling pathway. Development.                    |
| MGC50104      | Similar to RIKEN cDNA 1810046K07 gene                                 | NM_198498 | 2.579 | 0.51  | 1.042 | 0.556 |       |       |                                                                                                                               |
| DKFZp761B1219 | hypothetical protein cDNA DKFZp761B1219 (from clone DKFZ)             | AL831923  | 1.006 | 1.443 | 1.406 | 0.516 | 1.201 | 0.636 |                                                                                                                               |
| IRX4          | iroquois homeobox protein 4                                           | NM_016358 | 1.375 | 0.641 | 1.153 | 0.506 | 1.082 | 0.439 | Regulation of transcription, DNA-dependent. Heart development.                                                                |
| LIN28         | lin-28 homolog                                                        | NM_024674 | 2.162 | 0.694 |       |       | 1.438 | 0.822 | Regulation of transcription, DNA-dependent.                                                                                   |
| TNNI1         | * troponin I, skeletal, slow*                                         | NM_003281 | 1.821 | 0.665 |       |       | 1.774 | 0.536 | Regulation of striated muscle contraction. Muscle development.                                                                |
| N/A           | N/A                                                                   | AK024257  | 1.223 | 0.886 | 1.277 | 0.394 | 1.093 | 0.455 | Cell adhesion.                                                                                                                |
| TLP           | thymus LIM protein TLP-A                                              | NM_206922 | 1.602 | 0.748 |       |       | 1.989 | 0.421 |                                                                                                                               |
| AP1G2         | * adaptor-related protein complex 1, gamma 2 subunit*                 | NM_080545 | 2.129 | 1.128 |       |       | 1.459 | 0.899 | Protein complex assembly. Intracellular protein transport. Endocytosis.                                                       |
| PRLR          | prolactin receptor                                                    | NM_000949 | 2.424 | 0.571 |       |       | 1.162 | 0.579 | Steroid biosynthesis. Steroid biosynthesis. Anti-apoptosis. Anti-apoptosis.                                                   |
| GSC           | gooseoid                                                              | NM_173849 | 2.161 | 0.721 |       |       | 1.422 | 0.465 |                                                                                                                               |
| INA           | * internexin neuronal intermediate filament protein, alpha*           | NM_032727 | 2.038 | 0.636 |       |       | 1.541 | 0.489 | Neurogenesis. Cell differentiation.                                                                                           |
| CLECSF13      | C-type lectin, superfamily member 13*                                 | NM_173535 |       |       | 1.196 | 0.901 | 2.381 | 0.551 |                                                                                                                               |
| SLC14A2       | * solute carrier family 14 (urea transporter), member 2*              | NM_007163 | 1.868 | 0.563 |       |       | 1.708 | 0.494 | Transport. Urea transport. Urea transport.                                                                                    |
| SCGB1D1       | lipophilin A                                                          | NM_006552 | 1.838 | 0.433 |       |       | 1.736 | 0.407 |                                                                                                                               |
| ADORA1        | adenosine A1 receptor                                                 | NM_000674 | 1.513 | 0.891 |       |       | 2.061 | 0.824 | Phagocytosis. Inflammatory response. G-protein coupled receptor protein signaling pathway. Cell-cell signaling.               |
| KIAA1154      | KIAA1154 protein                                                      | AB032980  | 2.154 | 0.522 |       |       | 1.417 | 0.407 | Cellular defense response. Intracellular signaling cascade.                                                                   |

|               |                                                                 |              |       |       |       |       |       |       |                                                                                              |  |
|---------------|-----------------------------------------------------------------|--------------|-------|-------|-------|-------|-------|-------|----------------------------------------------------------------------------------------------|--|
| N/A           | YPLR6490                                                        | AY358209     | 2.344 | 0.92  | 1.221 | 0.478 |       |       |                                                                                              |  |
| N/A           | N/A                                                             | AK128772     | 1.617 | 0.36  |       |       | 1.947 | 0.366 | Neuropeptide signaling pathway.                                                              |  |
| N/A           | N/A                                                             | AK056949     |       |       | 1.007 | 0.601 | 2.551 | 0.372 |                                                                                              |  |
| CAMK2B        | calcium/calmodulin-dependent protein kinase IIB isoform 1       | NM_001220    |       |       | 1.365 | 0.428 | 2.193 | 0.832 | Protein amino acid phosphorylation. Protein amino acid phosphorylation. Signal transduction. |  |
| ECEL1         | endothelin-converting enzyme ECEL1                              | AB030579     | 1.109 | 0.649 | 1.005 | 0.553 | 1.443 | 0.749 | Proteolysis and peptidolysis. Neuropeptide signaling pathway.                                |  |
| NDRG4         | NDRG family member 4                                            | NM_020465    | 1.04  | 0.68  | 1.336 | 0.876 | 1.126 | 0.626 | Response to stress. Cell growth. Cell differentiation.                                       |  |
| SIGLEC11      | sialic acid binding Ig-like lectin 11                           | NM_052884    |       |       | 1.742 | 0.268 |       | 1.812 | 0.267                                                                                        |  |
| TFF3          | trefoil factor 3 precursor                                      | NM_003226    |       |       | 1.334 | 1.122 |       | 2.211 | 0.644                                                                                        |  |
| N/A           | N/A                                                             | AK128146     |       |       | 1.493 | 0.54  |       | 2.052 | 0.464                                                                                        |  |
| TRIM40        | TRIM40 protein                                                  | BC060785     |       |       | 2.245 | 0.729 |       | 1.299 | 0.668                                                                                        |  |
| FLJ00136      | FLJ00136 protein                                                | AK074065     |       |       |       |       | 1.198 | 0.648 | 2.342                                                                                        |  |
| N/A           | N/A                                                             | AK126028     |       |       | 1.379 | 0.787 | 1.088 | 0.824 | 1.071                                                                                        |  |
| IGFL4         | insulin growth factor-like family member 4                      | NM_001002923 |       |       | 1.387 | 0.65  |       | 2.148 | 0.648                                                                                        |  |
| FXYD6         | FXYD6 protein                                                   | BC018652     |       |       | 1.38  | 0.63  |       | 2.153 | 0.712                                                                                        |  |
| LOC339047     | LOC339047 protein                                               | BC008178     |       |       | 1.526 | 0.368 |       | 2.005 | 0.146                                                                                        |  |
| OR6B2         | * olfactory receptor, family 6, subfamily B, member 2*          | NM_001005853 |       |       | 1.351 | 0.835 |       | 2.178 | 0.356                                                                                        |  |
| FCGR1A        | * Fc fragment of IgG, high affinity Ia, receptor for (CD64)*    | NM_000566    |       |       | 1.744 | 0.603 |       | 1.784 | 0.243                                                                                        |  |
| KIAA0631      | KIAA0631 protein                                                | AB014531     |       |       | 1.721 | 0.586 |       | 1.806 | 0.525                                                                                        |  |
| MARK1         | MAP/microtubule affinity-regulating kinase 1                    | NM_018650    |       |       | 2.407 | 0.856 |       | 1.118 | 0.475                                                                                        |  |
| IFNA5         | * interferon, alpha 5*                                          | NM_002169    |       |       | 1.768 | 0.775 |       | 1.756 | 0.383                                                                                        |  |
| TNRC4         | trinucleotide repeat containing 4                               | NM_007185    |       |       | 1.603 | 0.582 |       | 1.918 | 0.338                                                                                        |  |
| N/A           | hypothetical protein                                            | AJ311358     |       |       | 1.238 | 0.788 |       | 2.283 | 0.5                                                                                          |  |
| GPR81         | G protein-coupled receptor 81                                   | NM_032554    |       |       | 2.03  | 0.617 |       | 1.483 | 0.895                                                                                        |  |
| N/A           | protein phosphatase inhibitor 2                                 | AF275684     |       |       | 2.368 | 0.303 |       | 1.139 | 0.453                                                                                        |  |
| N/A           | testis-specific protein NYD-TSP1                                | AF333098     |       |       | 1.877 | 0.45  |       | 1.623 | 0.67                                                                                         |  |
| SIAT7A        | * GalNAc alpha-2, 6-sialyltransferase I*                        | NM_018414    |       |       | 1.388 | 0.376 |       | 2.111 | 0.557                                                                                        |  |
| IGFBP1        | insulin-like growth factor binding protein 1                    | NM_000596    |       |       | 2.079 | 0.705 |       | 1.418 | 0.215                                                                                        |  |
| PLCXD3        | * phosphatidylinositol-specific phospholipase C, X domain con   | NM_001005473 |       |       | 1.946 | 0.795 |       | 1.547 | 0.549                                                                                        |  |
| NHLH2         | nescent helix loop helix 2                                      | NM_005599    |       |       | 2.435 | 0.998 |       | 1.056 | 0.96                                                                                         |  |
| N/A           | N/A                                                             | AK125618     | 3.755 | 0.301 | 1.714 | 0.553 | 1.775 | 0.305 | 1.418                                                                                        |  |
| RP1L1         | retinitis pigmentosa 1-like 1                                   | NM_178857    |       |       | 1.83  | 0.476 |       | 1.657 | 0.678                                                                                        |  |
| N/A           | N/A                                                             | AK127467     |       |       | 1.549 | 0.543 |       | 1.938 | 0.936                                                                                        |  |
| N/A           | Unknown (protein for MGC:87634)                                 | BC066987     |       |       | 2.147 | 0.793 |       | 1.339 | 0.438                                                                                        |  |
| N/A           | N/A                                                             | AK125695     |       |       | 1.738 | 0.556 |       | 1.748 | 0.459                                                                                        |  |
| CSTL1         | cystatin-like 1 precursor                                       | NM_138283    |       |       | 1.806 | 0.886 |       | 1.677 | 0.57                                                                                         |  |
| CNNM1         | cyclin M1                                                       | NM_020348    |       |       | 1.017 | 0.442 | 1.102 | 0.4   | 1.358                                                                                        |  |
| EMID2         | putative emu2                                                   | NM_133457    |       |       | 1.103 | 0.327 | 1.178 | 0.511 | 1.195                                                                                        |  |
| CST8          | cystatin 8 precursor                                            | NM_005492    |       |       | 1.303 | 0.6   |       | 2.172 | 0.599                                                                                        |  |
| IL8RA         | interleukin 8 receptor alpha                                    | NM_000634    |       |       | 2.126 | 0.849 |       | 1.346 | 0.637                                                                                        |  |
| N/A           | N/A                                                             | AK098147     |       |       | 1.297 | 0.429 |       | 2.174 | 0.681                                                                                        |  |
| N/A           | TMC2                                                            | AY358613     |       |       | 2.023 | 0.689 |       | 1.447 | 0.584                                                                                        |  |
| EFNA3         | ephrin A3                                                       | NM_004952    |       |       | 1.683 | 0.591 |       | 1.785 | 0.49                                                                                         |  |
| HCG9          | HLA complex group 9                                             | NM_005844    |       |       | 1.715 | 0.622 |       | 1.752 | 0.478                                                                                        |  |
| RAET1L        | retinoic acid early transcript 1L                               | NM_130900    |       |       | 2.447 | 0.652 |       | 1.016 | 0.372                                                                                        |  |
| N/A           | N/A                                                             | X64979       |       |       | 1.84  | 0.554 |       | 1.622 | 1.05                                                                                         |  |
| N/A           | N/A                                                             | AK098759     |       |       | 2.062 | 0.689 |       | 1.399 | 0.405                                                                                        |  |
| HSPC105       | NAD(P) dependent steroid dehydrogenase-like                     | NM_145168    |       |       | 1.856 | 0.453 |       | 1.604 | 0.796                                                                                        |  |
| DKFZp434B1222 | hypothetical proteincDNA DKFZp434B1222 (from clone DKFZ         | AL133624     |       |       | 1.991 | 0.415 |       | 1.468 | 0.451                                                                                        |  |
| N/A           | N/A                                                             | BC028736     |       |       | 2.15  | 1.161 |       | 1.302 | 0.765                                                                                        |  |
| SESN3         | sestrin 3                                                       | NM_144665    |       |       | 2.403 | 1.134 |       | 1.048 | 0.79                                                                                         |  |
| DKFZp564G2082 | hypothetical protein                                            | AL833943     |       |       |       |       | 1.514 | 0.445 | 1.937                                                                                        |  |
| DKFZp761O1810 | hypothetical proteincDNA DKFZp761O1810 (from clone DKFZ         | AL713706     |       |       | 2.184 | 0.482 |       | 1.266 | 0.292                                                                                        |  |
| SIAT8A        | sialyltransferase 8A                                            | NM_003034    |       |       | 2.192 | 0.568 | 1.253 | 0.234 | 1.046                                                                                        |  |
| N/A           | N/A                                                             | AK092134     |       |       | 2.399 | 1.073 |       | 1.046 | 0.61                                                                                         |  |
| CYP19A1       | * cytochrome P450, family 19*                                   | NM_031226    |       |       | 1.562 | 0.693 |       | 1.88  | 0.39                                                                                         |  |
| PROP1         | * prophet of Pit1, paired-like homeodomain transcription factor | NM_006261    |       |       | 1.862 | 0.535 |       | 1.579 | 0.595                                                                                        |  |

|               |                                                                    |              |       |       |       |       |       |       |                                                                                                                                 |
|---------------|--------------------------------------------------------------------|--------------|-------|-------|-------|-------|-------|-------|---------------------------------------------------------------------------------------------------------------------------------|
| KRT13         | keratin 13 isoform a                                               | NM_153490    | 1.921 | 0.799 |       |       | 1.52  | 0.853 | Epidermis development.                                                                                                          |
| GRIK1         | * Glutamate receptor, ionotropic, kainate 1 isoform 2 precursor    | NM_175611    | 1.676 | 0.644 |       |       | 1.76  | 0.492 | Ion transport. Potassium ion transport. Glutamate signaling pathway. Synaptic transmission. Central nervous system development. |
| RBP4          | N/A                                                                | NM_006744    | 2.066 | 0.719 |       |       | 1.368 | 0.588 | Transport. Sensory perception. Visual perception-                                                                               |
| MUC3          | mucin                                                              | AF007194     | 1.078 | 0.547 |       |       | 2.351 | 0.454 |                                                                                                                                 |
| OR4D6         | * olfactory receptor, family 4, subfamily D, member 6*             | NM_001004708 | 2.124 | 0.909 | 1.298 | 0.88  |       |       |                                                                                                                                 |
| SERPINC1      | complement component 1 inhibitor precursor                         | NM_000062    | 1.855 | 0.564 |       |       | 1.567 | 0.548 | Immune response. Complement activation, classical pathway. Blood coagulation. Circulation.                                      |
| GPR74         | G protein-coupled receptor 74                                      | NM_004885    | 1.745 | 0.829 |       |       | 1.676 | 0.808 | Signal transduction. G-protein coupled receptor protein signaling pathway. Detection of abiotic stimulus.                       |
| TEKT1         | tektin 1                                                           | NM_053285    | 2.054 | 0.611 |       |       | 1.367 | 0.752 | Microtubule cytoskeleton organization and biogenesis.                                                                           |
| FLJ35171      | FLJ35171 protein                                                   | NM_199338    | 1.758 | 0.387 |       |       | 1.662 | 0.48  |                                                                                                                                 |
| MGC35206      | hypothetical protein MGC35206                                      | NM_178552    |       |       | 1.11  | 1.352 | 2.307 | 0.625 |                                                                                                                                 |
| CNGB1         | cyclic nucleotide gated channel beta 1                             | NM_001297    | 2.186 | 0.628 |       |       | 1.231 | 0.268 | Ion transport. Potassium ion transport.                                                                                         |
| LBP           | lipopolysaccharide-binding protein precursor                       | NM_004139    | 1.368 | 0.436 |       |       | 2.048 | 0.756 | Lipid transport. Acute-phase response. Cellular defense response. Response to pathogenic bacteria                               |
| GATA3         | GATA binding protein 3 isoform 1                                   | NM_001002295 | 2.38  | 0.578 |       |       | 1.035 | 0.718 | Regulation of transcription, DNA-dependent. Transcription from RNA polymerase II promoter. Defense response.                    |
| FLJ14001      | hypothetical protein FLJ14001                                      | NM_024677    | 2.23  | 0.79  | 1.183 | 0.679 |       |       |                                                                                                                                 |
| MMP9          | matrix metalloproteinase 9 preproprotein                           | NM_004994    | 1.63  | 0.618 |       |       | 1.783 | 0.3   | Collagen catabolism.                                                                                                            |
| WNT8B         | * wingless-type MMTV integration site family, member 8B prec       | NM_003393    | 2.132 | 0.537 |       |       | 1.278 | 0.295 | Signal transduction. Frizzled-2 signaling pathway. Cell-cell signaling. Development. Neurogenesis.                              |
| N/A           | Unknown (protein for IMAGE:4825217)                                | BC034818     | 2.157 | 0.507 |       |       | 1.252 | 0.416 |                                                                                                                                 |
| LOC90139      | tetraspanin similar to uroplakin 1                                 | NM_130783    | 1.776 | 0.848 |       |       | 1.633 | 0.48  |                                                                                                                                 |
| KCND3         | Shal-related potassium channel Kv4.3                               | AF120491     | 1.102 | 0.372 | 1.129 | 0.644 | 1.173 | 0.647 | Cation transport. Potassium ion transport.                                                                                      |
| N/A           | N/A                                                                | AK096973     | 1.772 | 0.879 |       |       | 1.631 | 0.663 |                                                                                                                                 |
| hCT2          | carnitine transporter 2                                            | AB055798     | 2.099 | 0.742 | 1.303 | 0.398 |       |       | Transport. Spermatid cell development. Spermatid cell development. Fertilization.                                               |
| SH3BGR2       | SH3 domain binding glutamic acid-rich protein like 2               | NM_031469    | 2.182 | 0.803 |       |       | 1.218 | 0.674 |                                                                                                                                 |
| KCNK13        | * potassium channel, subfamily K, member 13*                       | BC012779     | 1.291 | 0.537 | 1.045 | 0.684 | 1.063 | 0.718 | Ion transport. Potassium ion transport.                                                                                         |
| DKFZP564O0823 | DKFZP564O0823 protein                                              | NM_015393    | 1.874 | 0.379 |       |       | 1.521 | 0.606 |                                                                                                                                 |
| CALC          | calcitonin                                                         | X02330       | 2.088 | 0.605 |       |       | 1.304 | 0.585 | Skeletal development. G-protein signaling, coupled to cAMP nucleotide second messenger.                                         |
| AVPR1B        | arginine vasopressin receptor 1B                                   | NM_000707    | 1.44  | 0.576 |       |       | 1.952 | 0.701 | Signal transduction. Phospholipase C activation. Positive regulation of cytosolic calcium ion concentration.                    |
| KRTAP5-11     | keratin associated protein 5-11                                    | AJ628247     | 1.372 | 0.579 |       |       | 2.019 | 0.856 |                                                                                                                                 |
| SH3GL2        | SH3GL2 protein                                                     | BC032825     | 1.714 | 0.622 |       |       | 1.674 | 1.146 | Signal transduction. Central nervous system development.                                                                        |
| KIAA1384      | KIAA1384 protein                                                   | AB037805     | 1.341 | 1.004 |       |       | 2.045 | 1.162 |                                                                                                                                 |
| KIAA1264      | KIAA1264 protein                                                   | AB033090     | 1.571 | 0.779 |       |       | 1.814 | 0.879 | Protein amino acid phosphorylation.                                                                                             |
| FLJ41327      | FLJ41327 protein                                                   | NM_207485    | 1.35  | 0.365 |       |       | 2.034 | 0.642 |                                                                                                                                 |
| N/A           | SFVP2550                                                           | AY358815     | 1.465 | 1.14  |       |       | 1.315 | 0.686 |                                                                                                                                 |
| KIAA2015      | KIAA2015 protein                                                   | AB095935     | 1.092 | 0.754 | 1.164 | 0.426 | 1.126 | 0.453 |                                                                                                                                 |
| PLEKHA7       | * pleckstrin homology domain containing, family A member 2*        | NM_175058    | 1.113 | 0.894 | 1.137 | 0.552 | 1.131 | 0.819 |                                                                                                                                 |
| KIAA1392      | KIAA1392 protein                                                   | AB037813     | 1.27  | 0.562 |       |       | 2.11  | 0.294 |                                                                                                                                 |
| FLJ40083      | hypothetical protein FLJ40083                                      | NM_182628    |       |       | 1.242 | 0.65  | 2.137 | 0.679 |                                                                                                                                 |
| KIAA0220      | KIAA0220 protein                                                   | BC061522     | 1.33  | 0.329 |       |       | 2.047 | 0.206 | Neuropeptide signaling pathway.                                                                                                 |
| ZNF383        | zinc finger protein 383                                            | NM_152604    | 3.043 | 0.734 | 1.571 | 0.77  | 1.806 | 0.65  | Regulation of transcription, DNA-dependent.                                                                                     |
| SLC6A12       | * solute carrier family 6 (neurotransmitter transporter, betaine)/ | NM_003044    | 1.166 | 0.572 |       |       | 2.211 | 0.669 | Neurotransmitter transport. Amino acid transport.                                                                               |
| N/A           | N/A                                                                | AK124156     | 2.137 | 0.516 | 1.238 | 0.486 |       |       | Transmembrane receptor protein tyrosine kinase signaling pathway. Cellular defense response. T-cell activation.                 |
| MCOLN2        | mucopolip 2                                                        | NM_153259    | 2.295 | 0.928 |       |       | 1.08  | 0.496 | Protein amino acid phosphorylation. Signal transduction. Alcohol metabolism. Lipid metabolism. Metabolism.                      |
| PIGR          | polymeric immunoglobulin receptor                                  | NM_002644    | 1.652 | 0.583 |       |       | 1.722 | 0.373 | Protein secretion.                                                                                                              |
| TMPRSS6       | * transmembrane protease, serine 6*                                | NM_153609    | 1.03  | 1.102 |       |       | 2.342 | 0.567 | Angiogenesis. Proteolysis and peptidolysis. Intracellular signaling cascade.                                                    |
| UNC5B         | unc-5 homolog B                                                    | NM_170744    | 2.265 | 1.277 |       |       | 1.106 | 1.012 | Apoptosis. Signal transduction. Development.                                                                                    |
| LOC342897     | similar to F-box only protein 2                                    | NM_001001414 | 1.583 | 0.933 |       |       | 1.788 | 0.793 |                                                                                                                                 |
| FLJ30707      | FLJ30707 protein                                                   | BC051771     | 1.947 | 1.099 |       |       | 1.423 | 0.627 |                                                                                                                                 |
| OXGR1         | oxoglutarate (alpha-ketoglutarate) receptor 1                      | NM_080818    | 1.683 | 0.431 |       |       | 1.685 | 0.482 |                                                                                                                                 |
| N/A           | N/A                                                                | AK128705     | 1.509 | 0.47  |       |       | 1.855 | 0.618 |                                                                                                                                 |
| C9orf65       | chromosome 9 open reading frame 65                                 | NM_138818    | 1.993 | 0.62  |       |       | 1.37  | 0.697 |                                                                                                                                 |
| OR13J1        | * olfactory receptor, family 13, subfamily J, member 1*            | NM_001004487 | 1.915 | 0.75  |       |       | 1.447 | 0.449 |                                                                                                                                 |
| KIAA1442      | KIAA1442 protein                                                   | AB037863     | 1.839 | 0.819 |       |       | 1.514 | 0.661 | Proteolysis and peptidolysis.                                                                                                   |
| FLJ00254      | FLJ00254 protein                                                   | AK074181     | 2.742 | 0.037 | 1.622 | 0.629 | 1.73  | 0.375 | Protein amino acid phosphorylation. Signal transduction. Alcohol metabolism. Lipid metabolism.                                  |
| NOS3          | nitric oxide synthase 3 (endothelial cell)                         | NM_000603    | 1.726 | 0.683 |       |       | 1.623 | 0.618 | Electron transport. Amino acid metabolism. Nitric oxide biosynthesis. Cell motility.                                            |
| DKFZp761P211  | similar to hypothetical protein Y97E10AL.1                         | NM_001003665 | 1.905 | 0.774 | 1.444 | 0.849 |       |       |                                                                                                                                 |
| NBL1          | * neuroblastoma, suppression of tumorigenicity 1 precursor*        | NM_182744    | 2.304 | 0.372 | 1.045 | 0.531 |       |       | Cell cycle. Negative regulation of cell cycle.                                                                                  |
| N/A           | N/A                                                                | AK075525     | 1.797 | 0.547 |       |       | 1.55  | 0.729 |                                                                                                                                 |

|              |                                                                  |           |       |       |       |       |       |                                                                                                                 |                                                                                                             |
|--------------|------------------------------------------------------------------|-----------|-------|-------|-------|-------|-------|-----------------------------------------------------------------------------------------------------------------|-------------------------------------------------------------------------------------------------------------|
| CABP1        | CABP1 protein                                                    | BC015006  | 1.189 | 0.697 |       | 2.156 | 0.472 | Protein amino acid phosphorylation. Signal transduction. Alcohol metabolism. Lipid metabolism.                  |                                                                                                             |
| TGM5         | transglutaminase 5 isoform 1                                     | NM_201631 | 1.297 | 0.527 |       | 2.048 | 0.554 | Epidermis development. Peptide cross-linking.                                                                   |                                                                                                             |
| PODXL2       | endoglycan                                                       | BC052585  | 1.924 | 0.839 |       | 1.421 | 1.194 |                                                                                                                 |                                                                                                             |
| KRT6IRS      | keratin 6 irs                                                    | NM_033448 | 1.011 | 0.558 |       | 2.334 | 0.411 |                                                                                                                 |                                                                                                             |
| SCGB1D4      | secretoglobin family 1D member 4                                 | NM_206998 | 1.531 | 0.581 |       | 1.813 | 0.478 |                                                                                                                 |                                                                                                             |
| VENTX2       | VENT-like homeobox 2                                             | NM_014468 |       |       | 1.838 | 0.688 | 1.502 | 0.931                                                                                                           | Regulation of transcription, DNA-dependent.                                                                 |
| CILP         | cartilage intermediate layer protein                             | NM_003613 | 1.737 | 0.583 |       | 1.601 | 0.34  | Nucleobase, nucleoside, nucleotide and nucleic acid metabolism.                                                 |                                                                                                             |
| N/A          | N/A                                                              | AK055704  | 1.52  | 0.542 |       | 1.815 | 0.478 | Protein amino acid dephosphorylation.                                                                           |                                                                                                             |
| ASCL2        | achaete-scute complex homolog-like 2                             | NM_005170 | 1.67  | 1.197 |       | 1.665 | 0.879 | Transcription. Central nervous system development. Peripheral nervous system development. Cell differentiation. |                                                                                                             |
| N/A          | N/A                                                              | AK125859  | 1.61  | 0.774 |       | 1.722 | 0.6   |                                                                                                                 |                                                                                                             |
| RAP140       | retinoblastoma-associated protein 140                            | NM_015224 | 1.589 |       | 2.313 | 1.741 |       |                                                                                                                 |                                                                                                             |
| FP14381      | unknown                                                          | AF461895  | 1.791 | 0.493 |       | 1.539 | 0.613 |                                                                                                                 |                                                                                                             |
| KCNK17       | potassium channel, subfamily K, member 17*                       | NM_031460 |       |       | 1.295 | 0.687 | 2.032 | 0.742                                                                                                           | Ion transport. Potassium ion transport.                                                                     |
| TFAP2B       | transcription factor AP-2 beta (activating enhancer binding prot | NM_003221 | 1.901 | 0.481 |       | 1.425 | 0.664 | Transcription. Regulation of transcription from RNA polymerase II promoter. Neurogenesis.                       |                                                                                                             |
| SCIN         | SCIN protein                                                     | BC021090  | 2.142 | 0.851 |       | 1.18  | 0.872 |                                                                                                                 |                                                                                                             |
| NBC4         | sodium bicarbonate cotransporter NBC4c                           | AF293337  | 1.438 | 1.48  |       | 1.884 | 0.488 | Anion transport. Bicarbonate transport.                                                                         |                                                                                                             |
| N/A          | N/A                                                              | AK129827  | 2.261 | 0.851 |       | 1.061 | 0.632 |                                                                                                                 |                                                                                                             |
| FAM46C       | FLJ20202 protein                                                 | NM_017709 | 1.723 | 0.934 | 1.599 | 1.096 |       |                                                                                                                 |                                                                                                             |
| CYP21A2      | * cytochrome P450, family 21, subfamily A, polypeptide 2*        | NM_000500 | 1.725 | 0.53  |       | 1.596 | 0.533 | Electron transport. C21-steroid hormone biosynthesis.                                                           |                                                                                                             |
| N/A          | PRO2769                                                          | AF116713  | 1.231 | 0.642 |       | 2.09  | 0.503 | Hyaluronan metabolism. Immune cell activation.                                                                  |                                                                                                             |
| KIAA1159     | KIAA1159 protein                                                 | AB032985  | 1.655 | 0.777 |       | 1.661 | 0.742 | Neuropeptide signaling pathway.                                                                                 |                                                                                                             |
| N/A          | hypothetical protein                                             | AJ295984  | 1.364 | 0.654 |       | 1.951 | 0.536 | Protein amino acid phosphorylation. Signal transduction. Alcohol metabolism. Lipid metabolism.                  |                                                                                                             |
| MGC33309     | hypothetical protein MGC33309                                    | NM_152413 | 1.645 | 0.546 |       | 1.67  | 0.632 |                                                                                                                 |                                                                                                             |
| CD244        | NK cell type I receptor protein 2B4                              | AF363452  | 1.412 | 0.598 |       | 1.902 | 0.917 |                                                                                                                 |                                                                                                             |
| LOC387700    | similar monocarboxylate transporter                              | NM_213606 | 1.739 | 0.864 |       | 1.573 | 0.775 | Protein amino acid phosphorylation. Signal transduction. Alcohol metabolism. Lipid metabolism. Metabolism.      |                                                                                                             |
| N/A          | N/A                                                              | AK124496  | 1.542 | 0.196 |       | 1.769 | 0.368 | Protein amino acid phosphorylation. Signal transduction. Alcohol metabolism. Lipid metabolism.                  |                                                                                                             |
| CA8          | carbonic anhydrase VIII                                          | NM_004056 | 1.752 | 0.537 |       | 1.559 | 0.56  | One-carbon compound metabolism.                                                                                 |                                                                                                             |
| FLJ38723     | hypothetical protein FLJ38723                                    | NM_173805 | 1.232 | 1.823 | 1.773 | 0.754 | 1.537 | 0.707                                                                                                           |                                                                                                             |
| PVALB        | parvalbumin                                                      | NM_002854 | 1.203 | 0.472 |       | 2.104 | 0.692 | Muscle development.                                                                                             |                                                                                                             |
| HAPLN2       | brain link protein-1                                             | NM_021817 | 2.065 | 0.776 |       | 1.241 | 0.575 | Cell adhesion.                                                                                                  |                                                                                                             |
| CHRM1        | * cholinergic receptor, muscarinic 1*                            | NM_000738 | 1.295 | 0.986 |       | 2.011 | 0.678 | Protein modification. Signal transduction. Protein kinase C activation. Muscarinic acetylcholine receptor.      |                                                                                                             |
| N/A          | N/A                                                              | AK074473  | 1.95  | 0.529 |       | 1.355 | 0.643 |                                                                                                                 |                                                                                                             |
| RASEF        | RAS and EF hand domain containing                                | NM_152573 | 1.957 | 0.941 | 1.345 | 0.842 |       | Small GTPase mediated signal transduction. Protein transport.                                                   |                                                                                                             |
| GCA          | * grancalcin, EF-hand calcium binding protein"                   | NM_012198 | 2.158 | 0.483 |       | 1.143 | 0.597 | Membrane fusion.                                                                                                |                                                                                                             |
| CACNG8       | voltage-dependent calcium channel gamma-8 subunit                | NM_031895 | 1.13  | 0.906 |       | 2.17  | 0.607 | Ion transport. Calcium ion transport.                                                                           |                                                                                                             |
| DKFZp761B107 | hypothetical protein DKFZp761B107                                | NM_173463 | 1.956 | 0.93  |       | 1.341 | 0.466 |                                                                                                                 |                                                                                                             |
| CHD7         | chromodomain helicase DNA binding protein 7                      | NM_017780 | 2.234 | 1.082 | 1.063 | 0.839 |       | Chromatin assembly or disassembly.                                                                              |                                                                                                             |
| LRRTM1       | leucine rich repeat transmembrane neuronal 1                     | NM_178839 | 1.452 | 0.543 |       | 1.84  | 0.593 |                                                                                                                 |                                                                                                             |
| FLJ42486     | FLJ42486 protein                                                 | NM_207379 |       |       | 1.487 | 0.592 | 1.804 | 0.37                                                                                                            |                                                                                                             |
| N/A          | Unknown (protein for IMAGE:4724389)                              | BC020909  | 1.805 | 0.438 |       | 1.484 | 0.468 |                                                                                                                 |                                                                                                             |
| LRP5         | low density lipoprotein receptor-related protein 5               | NM_002335 |       |       | 1.493 | 0.347 | 1.794 | 0.531                                                                                                           | Lipid metabolism. Endocytosis. Signal transduction. Development. Positive regulation of cell proliferation. |
| CD1D         | * CD1D antigen, d polypeptide*                                   | NM_001766 | 1.944 | 0.833 |       | 1.342 | 0.729 | Detection of bacteria. T-cell selection. Positive regulation of innate immune response.                         |                                                                                                             |
| N/A          | N/A                                                              | AK126297  | 1.487 | 0.721 |       | 1.796 | 0.452 |                                                                                                                 |                                                                                                             |
| N/A          | N/A                                                              | AK056716  |       |       | 1.641 | 0.687 | 1.642 | 0.865                                                                                                           |                                                                                                             |
| FLJ39743     | hypothetical protein FLJ39743                                    | NM_182562 |       |       | 1.388 | 0.92  | 1.891 | 0.798                                                                                                           |                                                                                                             |
| N/A          | X2 box repressor                                                 | U22680    | 2.239 | 1.097 |       | 1.039 | 0.81  |                                                                                                                 |                                                                                                             |
| PSCDBP       | * pleckstrin homology, Sec7 and coiled-coil domains, binding p   | NM_004288 | 2.005 | 0.933 |       | 1.269 | 0.739 |                                                                                                                 |                                                                                                             |
| ZPB2         | zona pellucida binding protein 2 isoform 1                       | NM_198844 | 1.236 | 0.662 |       | 2.037 | 0.908 | Binding of sperm to zona pellucida.                                                                             |                                                                                                             |
| CD86         | CD86 antigen isoform 2 precursor                                 | NM_006889 | 1.637 | 0.496 |       | 1.635 | 0.54  | Immune response. Positive regulation of cell proliferation. T-cell activation.                                  |                                                                                                             |
| N/A          | AKAP-binding sperm protein ropporin                              | AF231410  | 1.947 | 0.473 |       | 1.316 | 0.741 | Cytokinesis. Signal transduction. Rho protein signal transduction. Spermatogenesis. Acrosome reaction.          |                                                                                                             |
| FLJ00197     | FLJ00197 protein                                                 | AK074125  | 2.24  | 0.926 |       | 1.022 | 0.922 |                                                                                                                 |                                                                                                             |
| DMBT1        | deleted in malignant brain tumors 1 isoform b precursor          | NM_007329 | 1.331 | 0.795 |       | 1.93  | 0.407 | Epithelial cell differentiation. Induction of bacterial agglutination. Innate immune response.                  |                                                                                                             |
| KRTAP9-4     | keratin associated protein 9-4                                   | NM_033191 |       |       | 1.169 | 0.339 | 2.09  | 0.557                                                                                                           |                                                                                                             |
| UNC5C        | unc5C                                                            | NM_003728 | 2.017 | 0.629 |       | 1.24  | 0.64  | Apoptosis. Signal transduction. Development. Axon guidance. Brain development.                                  |                                                                                                             |
| PDE1B        | phosphodiesterase 1B, calmodulin-dependent"                      | NM_000924 |       |       | 1.412 | 0.712 | 1.843 | 0.501                                                                                                           | Apoptosis. Signal transduction.                                                                             |
| COAS2        | cyclophilin-LC                                                   | NM_178230 | 1.759 | 0.252 |       | 1.49  | 0.191 | Protein folding.                                                                                                |                                                                                                             |

|               |                                                                   |              |       |       |       |       |       |                                                                                                                                 |
|---------------|-------------------------------------------------------------------|--------------|-------|-------|-------|-------|-------|---------------------------------------------------------------------------------------------------------------------------------|
| PRKCG         | * protein kinase C, gamma*                                        | NM_002739    | 2.163 | 0.679 |       | 1.084 | 0.232 | Protein amino acid phosphorylation. Intracellular signaling cascade.                                                            |
| MOG           | MOG protein                                                       | BC035938     | 1.761 | 0.682 |       | 1.482 | 0.583 | Protein amino acid phosphorylation. Signal transduction. Alcohol metabolism. Lipid metabolism. Metabolism.                      |
| IL1R2         | * interleukin 1 receptor, type II precursor*                      | NM_004633    | 1.361 | 0.444 |       | 1.881 | 0.62  | Immune response.                                                                                                                |
| ALDH5A1       | * aldehyde dehydrogenase 5A1 precursor, isoform 1*                | NM_170740    | 1.941 | 1.295 |       | 1.299 | 0.621 | Metabolism. Gamma-aminobutyric acid metabolism. Gamma-aminobutyric acid catabolism. Dopamine metabolism.                        |
| CML2          | putative N-acetyltransferase Camello 2                            | NM_016347    | 1.23  | 0.807 |       | 2.009 | 0.467 | Response to drug.                                                                                                               |
| N/A           | N/A                                                               | AK125438     |       |       | 1.274 | 0.718 | 1.963 | 0.321                                                                                                                           |
| MYH6          | myosin heavy chain 6                                              | NM_002471    | 1.574 | 0.713 |       | 1.661 | 0.39  | Striated muscle contraction. Muscle development.                                                                                |
| FCA/MR        | Fc alpha/mu receptor                                              | NM_032029    | 1.469 | 0.375 |       | 1.764 | 0.827 |                                                                                                                                 |
| KIAA0837      | KIAA0837 protein                                                  | AB020644     |       |       | 1.368 | 0.606 | 1.861 | 0.584                                                                                                                           |
| GF11B         | * growth factor independent 1B (potential regulator of CDKN1)     | NM_004188    | 1.959 | 0.666 |       | 1.267 | 0.376 | G1-specific transcription in mitotic cell cycle. Negative regulation of transcription. Cell proliferation.                      |
| KCNN3         | small conductance calcium-activated potassium channel protei      | NM_002249    | 1.935 | 0.468 |       | 1.289 | 0.796 | Ion transport. Potassium ion transport. Potassium ion transport. Synaptic transmission. Neurogenesis.                           |
| MGC34827      | hypothetical protein MGC34827                                     | NM_152693    | 1.56  | 0.487 |       | 1.661 | 0.614 |                                                                                                                                 |
| LSECtin       | liver and lymph node sinusoidal endothelial cell C-type lectin    | NM_198492    | 1.353 | 0.81  |       | 1.865 | 0.723 |                                                                                                                                 |
| FLJ37927      | CDC20-like protein                                                | NM_152623    | 3.21  | 1.18  |       |       |       |                                                                                                                                 |
| ITGB1BP3      | integrin beta 1 binding protein 3                                 | NM_170678    | 1.507 | 0.528 |       | 1.701 | 0.845 | Pyridine nucleotide biosynthesis.                                                                                               |
| NDRG2         | N-myc downstream-regulated gene 2 isoform a                       | NM_201535    | 1.683 | 0.472 |       | 1.523 | 0.609 | Cell differentiation. Cell differentiation.                                                                                     |
| N/A           | prothymosin a14                                                   | AF170294     | 1.705 | 0.936 |       | 1.501 | 0.878 |                                                                                                                                 |
| N/A           | N/A                                                               | AK074442     | 1.077 | 0.476 |       | 2.127 | 0.753 | Muscle contraction.                                                                                                             |
| BPI           | bactericidal/permeability-increasing protein precursor            | NM_001725    | 1.714 | 0.539 |       | 1.489 | 0.264 | Immune response. Defense response to bacteria.                                                                                  |
| C1QR1         | * complement component 1, q subcomponent, receptor 1*             | NM_012072    | 1.93  | 0.871 |       | 1.272 | 0.669 | Phagocytosis. Antimicrobial humoral response (sensu Protostomia). Cell-cell adhesion. Macrophage activation.                    |
| COL19A1       | alpha 1 type XIX collagen precursor                               | NM_001858    | 1.894 | 0.679 |       | 1.307 | 0.493 | Skeletal development. Phosphate transport. Cell adhesion. Cell-cell adhesion. Extracellular matrix organization and biogenesis. |
| N/A           | N/A                                                               | AK125708     | 1.391 | 1.209 |       | 1.809 | 0.983 |                                                                                                                                 |
| DPCR1         | diffuse panbronchiolitis critical region 1 protein                | NM_080870    | 1.092 | 0.272 |       | 2.106 | 0.398 |                                                                                                                                 |
| N/A           | N/A                                                               | AK056484     | 1.752 | 0.447 |       | 1.441 | 0.607 |                                                                                                                                 |
| N/A           | skin-antimicrobial peptide 1 (SAP1)                               | Z71389       | 1.642 | 0.765 |       | 1.55  | 0.329 | Chemotaxis. Immune response. G-protein coupled receptor protein signaling pathway. Response to pest, pathogen or parasite.      |
| NKX6-2        | * NK6 transcription factor related, locus 2*                      | NM_177400    | 1.948 | 0.53  | 1.241 | 0.531 |       | Regulation of transcription, DNA-dependent.                                                                                     |
| N/A           | N/A                                                               | AK125166     | 1.169 | 0.328 |       | 2.02  | 0.39  |                                                                                                                                 |
| FLJ90165      | hypothetical protein FLJ90165                                     | NM_153338    | 1.221 | 0.492 |       | 1.968 | 0.401 | Protein amino acid phosphorylation. Signal transduction. Alcohol metabolism. Lipid metabolism.                                  |
| MGC26988      | hypothetical protein MGC26988                                     | NM_130899    |       |       | 1.089 | 0.904 | 2.097 | 1.208                                                                                                                           |
| OR8B4         | * olfactory receptor, family 8, subfamily B, member 4*            | NM_001005196 | 1.223 | 0.436 |       | 1.962 | 0.485 |                                                                                                                                 |
| HLA-DOA       | * major histocompatibility complex, class II, DO alpha*           | NM_002119    | 1.824 | 0.573 |       | 1.36  | 0.631 | Immune response. Antigen presentation, exogenous antigen. Antigen processing, exogenous antigen via MHC class II.               |
| AGXT2L1       | alanine-glyoxylate aminotransferase 2-like 1                      | NM_031279    | 2.092 | 0.802 |       | 1.092 | 0.369 | Amino acid metabolism.                                                                                                          |
| ADRB1         | beta-1-adrenergic receptor                                        | NM_000684    | 1.616 | 0.87  |       | 1.568 | 1.005 | Signal transduction. G-protein coupled receptor protein signaling pathway. Adenylate cyclase activation.                        |
| N/A           | N/A                                                               | AK093839     |       |       | 1.591 | 0.547 | 1.589 | 0.588                                                                                                                           |
| CHRNA2        | * cholinergic receptor, nicotinic, alpha polypeptide 2 (neuronal) | NM_000742    | 1.079 | 0.795 |       | 2.096 | 0.3   | Ion transport. Signal transduction. Synaptic transmission.                                                                      |
| DKFZp434P162  | hypothetical proteincDNA DKFZp434P162 (from clone DKFZp           | AL833871     | 1.125 | 0.226 |       | 2.051 | 0.437 |                                                                                                                                 |
| JACOP         | likely ortholog of mouse junction-associated coiled-coil protein  | NM_032866    | 1.035 | 0.589 | 1.057 | 0.907 | 1.084 | 0.995                                                                                                                           |
| P2RX2         | purinergic receptor P2X2 isoform D                                | NM_170683    | 2.083 | 0.893 | 1.092 | 0.423 |       | Ion transport.                                                                                                                  |
| KIF1A         | axonal transport of synaptic vesicles                             | NM_004321    | 1.025 | 0.578 | 1.066 | 0.542 | 1.083 | 0.576                                                                                                                           |
| FLJ25169      | hypothetical protein FLJ25169                                     | NM_152568    | 1.159 | 0.4   |       | 2.015 | 0.569 | Microtubule-based movement. Anterograde axon cargo transport.                                                                   |
| DKFZp434B1612 | hypothetical proteincDNA DKFZp434B1612 (from clone DKFZ           | AL157436     | 2.033 | 0.996 | 1.141 | 0.964 |       | MRNA processing. MRNA-nucleus export. Protein-nucleus import. Transport. Development.                                           |
| TBX4          | T-box 4                                                           | NM_018488    | 1.494 | 0.84  |       | 1.679 | 0.617 | Transcription. Regulation of transcription, DNA-dependent. Development.                                                         |
| N/A           | N/A                                                               | AK098018     | 1.31  | 0.523 |       | 1.863 | 0.734 | Protein amino acid phosphorylation. Signal transduction. Alcohol metabolism. Lipid metabolism.                                  |
| PTTG2         | pituitary tumor-transforming 2                                    | NM_006607    | 2.093 | 0.794 |       | 1.078 | 0.412 | DNA replication and chromosome cycle. DNA metabolism.                                                                           |
| PP3227        | unknown                                                           | AF193053     | 1.645 | 0.292 |       | 1.526 | 0.335 |                                                                                                                                 |
| GPR8          | G protein-coupled receptor 8                                      | NM_005286    | 1.338 | 0.706 |       | 1.833 | 0.593 | Signal transduction. G-protein coupled receptor protein signaling pathway.                                                      |
| DHDH          | dimeric dihydrodiol dehydrogenase                                 | NM_014475    | 2.865 | 0.331 |       | 1.319 | 0.363 | Carbohydrate metabolism. Electron transport. Metabolism.                                                                        |
| N/A           | N/A                                                               | AK093877     | 1.405 | 0.859 |       | 1.764 | 0.284 | Carbohydrate metabolism. Aldehyde metabolism.                                                                                   |
| CTNNA3        | * catenin, alpha 3*                                               | NM_013266    | 2.001 | 0.573 |       | 1.168 | 0.643 | Cell adhesion.                                                                                                                  |
| FLJ00278      | FLJ00278 protein                                                  | AK090401     | 1.232 | 0.194 |       | 1.936 | 0.368 |                                                                                                                                 |
| KRTAP12-4     | keratin associated protein 12-4                                   | NM_198698    | 1.017 | 0.685 |       | 2.151 | 0.626 |                                                                                                                                 |
| KIAA0656      | KIAA0656 protein                                                  | AB014556     | 1.776 | 1.281 |       | 1.391 | 0.985 |                                                                                                                                 |
| N/A           | PP10566                                                           | AF370395     | 1.446 | 0.681 |       | 1.715 | 0.645 |                                                                                                                                 |
| FLJ00292      | FLJ00292 protein                                                  | AK131088     | 1.748 | 0.431 |       | 1.413 | 0.3   |                                                                                                                                 |
| ABCG4         | * ATP-binding cassette, subfamily G, member 4*                    | NM_022169    | 1.5   | 1.319 |       | 1.661 | 0.752 | Transport.                                                                                                                      |
| N/A           | N/A                                                               | M21389       | 1.357 | 1.069 |       | 1.797 | 0.44  | Ectoderm development.                                                                                                           |

|               |                                                                    |              |       |       |       |       |       |       |       |       |                                                                                                                                 |
|---------------|--------------------------------------------------------------------|--------------|-------|-------|-------|-------|-------|-------|-------|-------|---------------------------------------------------------------------------------------------------------------------------------|
| GALR1         | galanin receptor 1                                                 | NM_001480    |       |       | 1.73  | 0.67  |       |       | 1.423 | 0.559 | Ion transport. Signal transduction. Negative regulation of adenylate cyclase activity. Neuropeptide signaling pathway.          |
| BMP7          | bone morphogenetic protein 7 precursor                             | NM_001719    |       |       |       |       | 1.076 | 0.694 | 2.076 | 0.97  | Skeletal development. Cell differentiation. Growth.                                                                             |
| CCR1          | chemokine (C-C motif) receptor 1                                   | NM_001295    |       |       | 2.119 | 0.938 |       |       | 1.032 | 0.536 | Chemotaxis. Inflammatory response. Cell adhesion. G-protein signaling, coupled to cyclic nucleotide second messenger.           |
| N/A           | N/A                                                                | AK126834     |       |       |       |       | 1.471 | 0.43  | 1.679 | 0.833 |                                                                                                                                 |
| NPL           | N-acetylneuraminate pyruvate lyase                                 | NM_030769    |       |       | 1.912 | 0.599 |       |       | 1.238 | 0.516 | Lysine biosynthesis. Diaminopimelate biosynthesis.                                                                              |
| TRIM29        | tripartite motif protein TRIM29 isoform alpha                      | NM_012101    |       |       | 1.233 | 0.595 |       |       | 1.916 | 0.491 | Transcription from RNA polymerase II promoter.                                                                                  |
| FLJ33387      | hypothetical protein FLJ33387                                      | NM_182526    |       |       | 1.703 | 0.925 |       |       | 1.445 | 0.883 |                                                                                                                                 |
| NFASC         | neurofascin isoform 1                                              | NM_001005388 |       |       | 1.262 | 0.891 |       |       | 1.884 | 1.123 | Cell adhesion.                                                                                                                  |
| ARHGEF15      | Rho guanine exchange factor 15                                     | NM_173728    |       |       | 1.057 | 0.703 |       |       | 2.084 | 0.442 |                                                                                                                                 |
| NOTCH4        | notch4 preproprotein                                               | NM_004557    |       |       | 1.604 | 1.083 |       |       | 1.536 | 0.373 | Patterning of blood vessels. Cell fate determination. Transcription. Notch signaling pathway.                                   |
| N/A           | N/A                                                                | AK130194     |       |       | 1.399 | 0.766 |       |       | 1.741 | 0.899 |                                                                                                                                 |
| FLJ37118      | hypothetical protein FLJ37118                                      | NM_173507    |       |       | 1.85  | 0.825 |       |       | 1.287 | 0.656 |                                                                                                                                 |
| KRTAP10-6     | keratin associated protein 10-6                                    | NM_198688    |       |       | 1.512 | 0.492 |       |       | 1.624 | 0.345 |                                                                                                                                 |
| INHBB         | inhibin beta B subunit precursor                                   | NM_002193    | 1.06  | 0.924 | 1.89  | 0.979 | 1.246 | 0.691 |       |       | Ovarian follicle development. Defense response. Response to external stimulus. Cell differentiation. Growth.                    |
| N/A           | N/A                                                                | AK126832     | 1.385 | 1.749 | 1.463 | 0.56  |       |       | 1.671 | 0.408 |                                                                                                                                 |
| N/A           | Unknown (protein for IMAGE:4105361)                                | BC016338     | 2.383 | 1.32  | 1.135 | 1     |       |       | 1.997 | 0.772 |                                                                                                                                 |
| N/A           | N/A                                                                | AK130933     |       |       | 1.752 | 0.258 |       |       | 1.38  | 0.476 |                                                                                                                                 |
| DKFZp434E1119 | hypothetical protein cDNA DKFZp434E1119 (from clone DKFZp AL834516 |              |       |       | 1.664 | 0.568 |       |       | 1.467 | 0.736 | Protein amino acid phosphorylation. Signal transduction. Alcohol metabolism. Lipid metabolism. Metabolism.                      |
| N/A           | amyloid lambda 6 light chain variable region PIP                   | AF267874     |       |       | 1.826 | 0.38  |       |       | 1.302 | 0.64  |                                                                                                                                 |
| KRTAP12-1     | keratin associated protein 12-1                                    | NM_181686    |       |       | 1.646 | 0.848 |       |       | 1.482 | 0.282 |                                                                                                                                 |
| N/A           | NPD009                                                             | AF237813     |       |       | 1.309 | 0.578 |       |       | 1.817 | 0.581 | Synaptic transmission. Gamma-aminobutyric acid metabolism. Neurotransmitter catabolism.                                         |
| FLJ00278      | FLJ00278 protein                                                   | AK090401     |       |       | 1.19  | 0.315 |       |       | 1.936 | 0.368 |                                                                                                                                 |
| KRTAP10-7     | keratin associated protein KAP10.7                                 | AJ566385     |       |       | 1.707 | 0.421 |       |       | 1.417 | 0.568 |                                                                                                                                 |
| DKFZP564J102  | DKFZP564J102 protein                                               | NM_015398    |       |       | 1.749 | 1.028 |       |       | 1.375 | 0.564 |                                                                                                                                 |
| CA14          | carbonic anhydrase XIV precursor                                   | NM_012113    |       |       | 1.917 | 0.475 |       |       | 1.207 | 0.865 | One-carbon compound metabolism.                                                                                                 |
| KIAA1511      | KIAA1511 protein                                                   | AB040944     | 1.065 | 1.166 | 1.96  | 0.806 |       |       | 1.159 | 0.704 |                                                                                                                                 |
| N/A           | Unknown (protein for MGC:71567)                                    | BC059370     |       |       | 1.495 | 0.599 |       |       | 1.623 | 0.359 |                                                                                                                                 |
| N/A           | N/A                                                                | AK057390     |       |       | 1.999 | 0.61  |       |       | 1.119 | 0.54  | Microtubule cytoskeleton organization and biogenesis.                                                                           |
| FLJ44006      | FLJ44006 protein                                                   | NM_001001696 |       |       | 1.479 | 0.819 |       |       | 1.637 | 1.027 |                                                                                                                                 |
| UNC5A         | UNC5A protein                                                      | BC009333     |       |       | 1.424 | 0.635 |       |       | 1.692 | 0.407 | Apoptosis. Signal transduction. Development.                                                                                    |
| MST148        | MST148 protein                                                     | AF184211     |       |       |       |       | 1.222 | 0.323 | 1.893 | 0.538 |                                                                                                                                 |
| N/A           | Unknown (protein for IMAGE:4477067)                                | BC012029     |       |       | 1.376 | 0.689 |       |       | 1.738 | 0.56  |                                                                                                                                 |
| HLA-DPB1      | * major histocompatibility complex, class II, DP beta 1 precurs    | NM_002121    |       |       | 2.071 | 0.629 |       |       | 1.042 | 0.478 | Immune response. Pathogenesis. Detection of pest, pathogen or parasite. Antigen presentation, exogenous antigen.                |
| DLGAP4        | disks large-associated protein 4 isoform a                         | NM_014902    |       |       | 1.067 | 0.53  |       |       | 2.046 | 0.656 | Cell-cell signaling.                                                                                                            |
| KCNA7         | potassium voltage-gated channel, shaker-related subfamily, mt      | NM_031886    |       |       |       |       | 1.083 | 0.307 | 2.026 | 0.44  | Protein amino acid phosphorylation. Signal transduction. Alcohol metabolism. Lipid metabolism.                                  |
| GRM4          | * glutamate receptor, metabotropic 4*                              | NM_000841    |       |       | 1.526 | 0.994 |       |       | 1.583 | 0.489 | G-protein coupled receptor protein signaling pathway. Negative regulation of adenylate cyclase activity. Synaptic transmission. |
| N/A           | N/A                                                                | AK127720     | 1.601 | 1.877 | 1.937 | 0.716 |       |       | 1.17  | 0.803 |                                                                                                                                 |
| SLC16A10      | * solute carrier family 16, member 10*                             | NM_018593    |       |       | 3.106 | 1.053 |       |       |       |       | Transport.                                                                                                                      |
| DKFZp686O2282 | hypothetical protein                                               | BX537382     |       |       |       |       | 1.463 | 0.326 | 1.643 | 0.777 | Sodium ion transport. Amino acid transport. L-asparagine transport. L-glutamine transport.                                      |
| N/A           | N/A                                                                | AK128620     |       |       | 1.344 | 0.762 |       |       | 1.757 | 0.698 |                                                                                                                                 |
| EFHD1         | EF hand domain containing 1                                        | NM_025202    |       |       | 2.043 | 0.73  | 1.058 | 0.694 |       |       |                                                                                                                                 |
| LZLP          | leucine zipper-like protein                                        | AF159055     |       |       | 1.882 | 0.386 |       |       | 1.216 | 0.47  |                                                                                                                                 |
| WFDC12        | WAP four-disulfide core domain 12 precursor                        | NM_080869    |       |       | 1.562 | 0.587 |       |       | 1.535 | 0.544 |                                                                                                                                 |
| N/A           | putative microtubule-binding protein                               | AJ251708     |       |       | 3.096 | 0.47  |       |       |       |       | DNA repair. Transcription. Regulation of transcription, DNA-dependent. Chromatin modification.                                  |
| FLJ43806      | hypothetical protein FLJ43806                                      | NM_201628    |       |       | 1.676 | 0.418 |       |       | 1.417 | 0.481 |                                                                                                                                 |
| UNQ467        | KIPV467                                                            | NM_207392    |       |       | 1.352 | 0.737 |       |       | 1.736 | 0.735 |                                                                                                                                 |
| SFTP2         | * surfactant, pulmonary-associated protein A2*                     | NM_006926    |       |       | 1.504 | 0.753 |       |       | 1.584 | 0.638 | Phosphate transport. Respiratory gaseous exchange. Regulation of liquid surface tension.                                        |
| PNPLA5        | patatin-like phospholipase domain containing 5                     | NM_138814    |       |       |       |       | 1.539 | 0.454 | 1.549 | 0.563 |                                                                                                                                 |
| RAMP3         | receptor (calcitonin) activity modifying protein 3 precursor       | NM_005856    | 1.04  | 0.977 |       |       | 1.205 | 0.872 | 1.882 | 0.785 | Intracellular protein transport. Receptor mediated endocytosis. Cell surface receptor linked signal transduction.               |
| N/A           | N/A                                                                | BC032235     |       |       | 1.82  | 0.875 |       |       | 1.266 | 0.306 |                                                                                                                                 |
| SPINT1        | hepatocyte growth factor activator inhibitor 1 isoform 1 precurs   | NM_181642    |       |       | 1.71  | 1.059 |       |       | 1.375 | 0.754 |                                                                                                                                 |
| N/A           | PCOLCE2                                                            | AY358557     |       |       | 2.002 | 0.781 |       |       | 1.08  | 0.669 |                                                                                                                                 |
| KCNA4         | * potassium voltage-gated channel, shaker-related subfamily, i     | NM_002233    |       |       | 1.501 | 0.738 |       |       | 1.576 | 0.653 | Cation transport. Potassium ion transport.                                                                                      |
| IFNA8         | * interferon, alpha 8*                                             | NM_002170    |       |       | 1.274 | 0.447 |       |       | 1.803 | 0.346 | Defense response.                                                                                                               |
| RIMS4         | regulating synaptic membrane exocytosis 4                          | NM_182970    |       |       |       |       | 1.21  | 0.881 | 1.865 | 1.103 | Neurotransmitter transport. Exocytosis.                                                                                         |
| PPM1E         | protein phosphatase 1E                                             | NM_014906    |       |       | 1.929 | 0.67  |       |       | 1.145 | 0.421 | Protein amino acid dephosphorylation.                                                                                           |

|               |                                                                     |              |       |       |       |       |       |       |       |       |                                                                                                                |  |  |
|---------------|---------------------------------------------------------------------|--------------|-------|-------|-------|-------|-------|-------|-------|-------|----------------------------------------------------------------------------------------------------------------|--|--|
| OR13A1        | * olfactory receptor, family 13, subfamily A, member 1*             | NM_001004297 | 1.066 | 0.759 | 1.799 | 0.579 | 1.275 | 0.305 |       |       |                                                                                                                |  |  |
| E2F3          | E2F3 protein                                                        | BC016847     |       |       | 1.981 | 0.546 |       |       | 1.089 | 0.588 | Regulation of cell cycle. Transcription. Regulation of transcription, DNA-dependent.                           |  |  |
| N/A           | Unknown (protein for IMAGE:5093011)                                 | BC068999     |       |       | 1.703 | 0.586 |       |       | 1.365 | 0.645 | Protein amino acid phosphorylation. Signal transduction. Alcohol metabolism. Lipid metabolism.                 |  |  |
| C14orf166B    | chromosome 14 open reading frame 166B                               | NM_194287    |       |       | 1.859 | 0.728 |       |       | 1.209 | 0.564 |                                                                                                                |  |  |
| N/A           | DAP-1 alpha                                                         | AF131778     |       |       |       |       | 1.297 | 0.474 | 1.771 | 1.179 | Cell-cell signaling.                                                                                           |  |  |
| MGC33846      | hypothetical protein MGC33846                                       | NM_175885    |       |       | 1.473 | 0.856 |       |       | 1.592 | 0.784 |                                                                                                                |  |  |
| LPHN3         | latrophilin 3                                                       | NM_015236    |       |       |       |       | 1.393 | 0.519 | 1.669 | 0.58  | Signal transduction. Neuropeptide signaling pathway.                                                           |  |  |
| KIAA1276      | KIAA1276 protein                                                    | AB033102     |       |       |       |       | 1.319 | 0.474 | 1.741 | 0.783 |                                                                                                                |  |  |
| TNFAIP2       | tumor necrosis factor, alpha-induced protein 2*                     | NM_006291    |       |       |       |       | 1.538 | 0.871 | 1.518 | 0.473 | Angiogenesis. Cell differentiation.                                                                            |  |  |
| SFTPA2        | * surfactant, pulmonary-associated protein A2*                      | NM_006926    |       |       | 1.568 | 0.607 |       |       | 1.488 | 0.656 | Phosphate transport. Respiratory gaseous exchange. Regulation of liquid surface tension.                       |  |  |
| APOL4         | apolipoprotein L4 isoform 1                                         | NM_030643    | 1.025 | 1.647 | 1.484 | 0.28  |       |       | 1.571 | 0.345 | Lipid transport. Lipoprotein metabolism.                                                                       |  |  |
| SLC37A1       | glycerol 3-phosphate permease                                       | AF311320     |       |       | 1.591 | 0.53  |       |       | 1.462 | 0.814 | Transport.                                                                                                     |  |  |
| SLC11A1       | * solute carrier family 11 (proton-coupled divalent metal ion tra   | NM_000578    |       |       | 1.151 | 0.248 |       |       | 1.902 | 0.083 | Transport. Transport. Iron ion transport. Response to bacteria.                                                |  |  |
| PR1           | PR1 protein                                                         | BC046362     |       |       | 1.187 | 0.766 |       |       | 1.866 | 0.392 |                                                                                                                |  |  |
| RIBC2         | RIB43A domain with coiled-coils 2                                   | NM_015653    |       |       |       |       | 1.283 | 0.445 | 1.788 | 0.628 |                                                                                                                |  |  |
| POU3F1        | * POU domain, class 3, transcription factor 1*                      | NM_002699    | 1.511 | 0.982 | 1.114 | 0.691 | 1.936 | 1.665 |       |       | Regulation of transcription, DNA-dependent. Nerve ensheathment.                                                |  |  |
| FLJ41423      | FLJ41423 protein                                                    | NM_001001679 |       |       | 1.586 | 0.728 |       |       | 1.463 | 0.655 |                                                                                                                |  |  |
| N/A           | myosin-reactive immunoglobulin light chain variable region          | AF035038     |       |       | 1.383 | 0.49  |       |       | 1.663 | 0.504 |                                                                                                                |  |  |
| TERT          | telomerase reverse transcriptase isoform 1                          | NM_003219    |       |       |       |       | 1.507 | 0.574 | 1.535 | 0.674 | RNA-dependent DNA replication. Telomerase-dependent telomere maintenance.                                      |  |  |
| N/A           | N/A                                                                 | AK124823     |       |       |       |       | 1.135 | 0.332 | 1.905 | 0.614 |                                                                                                                |  |  |
| KLF14         | Kruppel-like factor 14                                              | NM_138693    |       |       | 3.04  | 1.479 |       |       |       |       | Transcription. Regulation of transcription, DNA-dependent.                                                     |  |  |
| SMC1L2        | SMC1 structural maintenance of chromosomes 1-like 2                 | NM_148674    |       |       |       |       | 1.223 | 0.747 | 1.816 | 0.891 |                                                                                                                |  |  |
| N/A           | N/A                                                                 | AK124125     |       |       |       |       | 1.357 | 0.399 | 1.682 | 0.84  | Protein modification.                                                                                          |  |  |
| DKFZp667J0810 | hypothetical protein cDNA DKFZp667J0810 (from clone DKFZp           | AL713800     |       |       | 1.377 | 0.649 |       |       | 1.661 | 0.409 |                                                                                                                |  |  |
| SLC6A5        | * solute carrier family 6 (neurotransmitter transporter, glycine),  | NM_004211    |       |       | 1.159 | 0.829 |       |       | 1.873 | 0.665 | Neurotransmitter transport. Synaptic transmission.                                                             |  |  |
| GPR114        | G-protein coupled receptor 114                                      | NM_153837    |       |       | 1.435 | 0.662 |       |       | 1.597 | 0.425 | Signal transduction. Neuropeptide signaling pathway.                                                           |  |  |
| TMEM34        | transmembrane protein 34                                            | NM_018241    |       |       | 1.47  | 1.591 | 1.561 | 0.843 |       |       |                                                                                                                |  |  |
| DKFZp434M131  | hypothetical protein cDNA DKFZp434M131 (from clone DKFZp            | AL080179     |       |       | 1.309 | 0.447 |       |       | 1.722 | 0.399 |                                                                                                                |  |  |
| POU2F2        | * POU domain, class 2, transcription factor 2*                      | NM_002698    |       |       | 1.072 | 0.723 |       |       | 1.957 | 0.483 | Regulation of transcription, DNA-dependent. Humoral immune response.                                           |  |  |
| KIAA1257      | KIAA1257 protein                                                    | AB033083     |       |       | 1.095 | 1.008 |       |       | 1.932 | 0.988 |                                                                                                                |  |  |
| P-Rex2        | P-Rex2 protein                                                      | AJ437636     |       |       | 1.953 | 0.724 |       |       | 1.071 | 0.467 | Intracellular signaling cascade.                                                                               |  |  |
| N/A           | N/A                                                                 | AK125854     |       |       | 1.855 | 0.929 |       |       | 1.167 | 0.781 | Lipid metabolism. Intracellular signaling cascade.                                                             |  |  |
| LOC150236     | similar to hypothetical protein DKFZp434K191                        | NM_131915    |       |       | 1.959 | 0.37  |       |       | 1.062 | 0.316 |                                                                                                                |  |  |
| SIAT1         | sialyltransferase 1 isoform a                                       | NM_173216    |       |       | 1.543 | 0.641 |       |       | 1.476 | 0.693 | Protein amino acid glycosylation. Humoral immune response. Oligosaccharide metabolism. Growth.                 |  |  |
| ERAF          | erythroid associated factor                                         | NM_016633    |       |       | 1.695 | 1.002 |       |       | 1.322 | 0.667 | Protein folding. Hemoglobin metabolism. Hemopoiesis.                                                           |  |  |
| FKSG68        | FKSG68                                                              | AF338196     | 1.886 | 1.221 | 1.875 | 0.999 |       |       | 1.14  | 0.509 |                                                                                                                |  |  |
| HPGD          | hydroxyprostaglandin dehydrogenase 15-(NAD)                         | NM_000860    |       |       | 3.014 | 0.598 |       |       |       |       | Lipid metabolism. Fatty acid metabolism. Prostaglandin metabolism. Metabolism.                                 |  |  |
| KIAA1183      | KIAA1183 protein                                                    | AB033009     |       |       | 1.083 | 0.517 |       |       | 1.93  | 0.33  |                                                                                                                |  |  |
| SLC22A14      | organic cation transporter like 4                                   | NM_004803    |       |       | 1.647 | 1.032 | 1.365 | 0.589 |       |       | Transport.                                                                                                     |  |  |
| BCL11A        | B-cell CLL/lymphoma 11A isoform 1                                   | NM_022893    |       |       | 1.874 | 0.52  | 1.138 | 0.386 |       |       | Transcription. Regulation of transcription, DNA-dependent. Hemopoiesis.                                        |  |  |
| G6PC          | * glucose-6-phosphatase, catalytic*                                 | NM_000151    |       |       | 1.152 | 0.609 |       |       | 1.857 | 0.805 | Glycogen metabolism. Glycogen biosynthesis. Glucose metabolism. Transport.                                     |  |  |
| FLJ10748      | hypothetical protein FLJ10748                                       | NM_018203    |       |       | 1.885 | 0.723 |       |       | 1.12  | 0.367 |                                                                                                                |  |  |
| MYOM2         | myomesin 2                                                          | NM_003970    |       |       | 1.765 | 0.734 |       |       | 1.239 | 0.592 | Striated muscle contraction. Muscle development.                                                               |  |  |
| HPCA          | hippocalcin                                                         | NM_002143    |       |       | 1.006 | 0.36  |       |       | 1.997 | 0.886 |                                                                                                                |  |  |
| PAPOLB        | poly(A) polymerase beta (testis specific)                           | NM_020144    |       |       | 1.729 | 0.98  |       |       | 1.271 | 0.671 | Transcription. mRNA processing.                                                                                |  |  |
| HFSE-1        | HFSE-1                                                              | AF072164     | 1.629 | 1.933 | 1.642 | 1.308 | 1.358 | 1.602 |       |       |                                                                                                                |  |  |
| GLDC          | glycine dehydrogenase (decarboxylating)Homo sapiens glycine         | NM_000170    |       |       | 1.684 | 0.662 |       |       | 1.316 | 0.53  | Glycine catabolism.                                                                                            |  |  |
| TNFSF11       | * tumor necrosis factor ligand superfamily, member 11 isoform       | NM_003701    |       |       | 1.205 | 0.753 |       |       | 1.79  | 0.649 | Immune response. Cell differentiation. Osteoclast differentiation.                                             |  |  |
| N/A           | Unknown (protein for IMAGE:4797124)                                 | BC022565     |       |       | 1.658 | 0.712 | 1.334 | 0.66  |       |       | Protein amino acid phosphorylation. Signal transduction. Alcohol metabolism. Lipid metabolism. Metabolism.     |  |  |
| SLC1A3        | * solute carrier family 1 (glial high affinity glutamate transporte | NM_004172    |       |       | 2.991 | 0.504 |       |       |       |       | Neurotransmitter uptake. Transport. Dicarboxylic acid transport. Synaptic transmission. L-glutamate transport. |  |  |
| GPR73L1       | G protein-coupled receptor 73-like 1                                | NM_144773    |       |       | 1.115 | 0.651 |       |       | 1.876 | 0.805 | Signal transduction. G-protein coupled receptor protein signaling pathway.                                     |  |  |
| IL28RA        | * interleukin 28 receptor, alpha isoform 1*                         | NM_170743    |       |       | 1.756 | 0.5   |       |       | 1.233 | 0.851 |                                                                                                                |  |  |
| KDR           | kinase insert domain receptor (a type III receptor tyrosine kinat   | NM_002253    |       |       | 1.968 | 0.604 |       |       | 1.019 | 0.613 | Angiogenesis. Transmembrane receptor protein tyrosine kinase signaling pathway. Cell differentiation.          |  |  |
| TLS-ERG       | N/A                                                                 | S77574       |       |       | 1.088 | 0.57  |       |       | 1.894 | 1.178 |                                                                                                                |  |  |
| PODXL         | podocalyxin-like precursor                                          | NM_005397    |       |       | 1.702 | 0.745 |       |       | 1.278 | 0.477 |                                                                                                                |  |  |
| LY6G6E        | lymphocyte antigen 6 complex G6E isoform 2                          | NM_001003721 |       |       | 1.304 | 0.469 |       |       | 1.674 | 0.32  |                                                                                                                |  |  |



|               |                                                                         |              |       |       |       |       |       |       |                                                                            |                                                                                                                   |
|---------------|-------------------------------------------------------------------------|--------------|-------|-------|-------|-------|-------|-------|----------------------------------------------------------------------------|-------------------------------------------------------------------------------------------------------------------|
| MYL3          | MYL3 protein * ventricular, skeletal, slow, mRNA (cDNA clone 1 BC009790 |              |       |       | 1.054 | 0.479 | 1.923 | 0.518 | Muscle contraction. Muscle development.                                    |                                                                                                                   |
| KIAA1976      | KIAA1976 protein                                                        | AB075856     |       | 1.317 | 0.539 |       | 1.66  | 0.459 | Apoptosis. Signal transduction. Development.                               |                                                                                                                   |
| SALPR         | G-protein coupled receptor SALPR                                        | NM_016568    |       | 1.926 | 0.962 | 1.048 | 0.79  |       | Signal transduction. G-protein coupled receptor protein signaling pathway. |                                                                                                                   |
| pp12613       | unknown                                                                 | AF318325     |       | 1.816 | 0.469 |       | 1.157 | 0.68  |                                                                            |                                                                                                                   |
| KRT25B        | keratin 25B                                                             | NM_181539    |       | 1.891 | 1.361 |       | 1.082 | 1.17  |                                                                            |                                                                                                                   |
| SIAT7B        | sialyltransferase 7                                                     | NM_006456    |       | 1.419 | 0.933 |       | 1.553 | 0.86  | Protein amino acid glycosylation.                                          |                                                                                                                   |
| N/A           | N/A                                                                     | AK128824     |       | 1.387 | 0.696 |       | 1.577 | 0.737 |                                                                            |                                                                                                                   |
| ENPP5         | ectonucleotide pyrophosphatase/phosphodiesterase 5 (putative)           | NM_021572    |       | 1.708 | 0.673 |       | 1.255 | 0.515 | Nucleotide metabolism.                                                     |                                                                                                                   |
| ULBP1         | UL16 binding protein 1                                                  | AF425265     |       | 2.961 | 0.414 |       |       |       | Antigen presentation. Natural killer cell activation.                      |                                                                                                                   |
| DKFZp564L1878 | hypothetical protein cDNA DKFZp564L1878 (from clone DKFZ                | AL157430     |       | 2.961 | 0.785 |       |       |       |                                                                            |                                                                                                                   |
| DMRTC1        | DMRTC1 protein                                                          | BC029799     |       | 1.431 | 0.47  |       | 1.528 | 0.589 |                                                                            |                                                                                                                   |
| N/A           | N/A                                                                     | AK127522     | 3.128 | 0.568 | 1.154 | 0.604 |       | 1.805 | 0.427                                                                      |                                                                                                                   |
| PCK1          | cytosolic phosphoenolpyruvate carboxykinase 1                           | NM_002591    |       |       |       | 1.224 | 1.076 | 1.734 | 0.466                                                                      | Gluconeogenesis.                                                                                                  |
| N/A           | N/A                                                                     | AK002043     |       | 1.149 | 0.7   |       |       | 1.809 | 0.331                                                                      |                                                                                                                   |
| LGR6          | leucine-rich repeat-containing G protein-coupled receptor 6             | NM_021636    |       |       |       | 1.34  | 0.593 | 1.816 | 0.727                                                                      | Signal transduction. G-protein coupled receptor protein signaling pathway.                                        |
| RHBG          | RHBG protein                                                            | BC065218     |       | 1.321 | 0.717 |       |       | 1.63  | 0.802                                                                      | Transport.                                                                                                        |
| BENE          | BENE protein                                                            | NM_005434    |       | 1.793 | 0.507 |       |       | 1.156 | 0.632                                                                      |                                                                                                                   |
| NYD-SP25      | protein kinase NYD-SP25 isoform 1                                       | NM_033516    |       | 1.146 | 1.054 |       |       | 1.801 | 0.536                                                                      |                                                                                                                   |
| C20orf58      | chromosome 20 open reading frame 58                                     | NM_152864    | 1.094 | 1.109 |       | 1.166 | 0.568 | 1.781 | 0.832                                                                      |                                                                                                                   |
| RORB          | RAR-related orphan receptor B                                           | NM_006914    |       | 1.791 | 0.514 |       |       | 1.15  | 0.778                                                                      | Transcription. Regulation of transcription, DNA-dependent.                                                        |
| MRGX1         | G protein-coupled receptor MRGX1                                        | NM_147199    |       | 1.359 | 0.646 |       |       | 1.581 | 0.498                                                                      |                                                                                                                   |
| N/A           | N/A                                                                     | BX161445     |       | 1.075 | 0.796 |       |       | 1.864 | 0.493                                                                      |                                                                                                                   |
| CHRFAM7A      | CHRNA7-FAM7A fusion isoform 1                                           | NM_139320    |       | 1.642 | 0.525 |       |       | 1.297 | 0.317                                                                      | Activation of MAPK. Ion transport. Signal transduction. Synaptic transmission.                                    |
| OCA2          | P protein                                                               | NM_000275    |       | 1.787 | 0.313 |       |       | 1.15  | 0.549                                                                      | Eye pigment biosynthesis. Transport.                                                                              |
| MLNR          | motilin receptor                                                        | NM_001507    |       | 1.711 | 0.806 |       |       | 1.225 | 0.758                                                                      | Smooth muscle contraction. Signal transduction. G-protein coupled receptor protein signaling pathway.             |
| N/A           | pps22-1 protein                                                         | AY498718     |       |       |       | 1.332 | 0.204 | 1.603 | 0.311                                                                      |                                                                                                                   |
| CCL3          | chemokine (C-C motif) ligand 3                                          | NM_002983    |       | 1.69  | 1.172 |       |       | 1.245 | 0.887                                                                      | Calcium ion homeostasis. Exocytosis. Cell motility. Chemotaxis. Inflammatory response. Cytoskeleton organization. |
| N/A           | FEX2                                                                    | AY311388     |       | 1.911 | 0.839 |       |       | 1.022 | 1.132                                                                      |                                                                                                                   |
| SLC22A8       | solute carrier family 22 member 8                                       | NM_004254    |       | 1.222 | 0.886 |       |       | 1.71  | 0.485                                                                      | Transport. Ion transport. Organic anion transport.                                                                |
| N/A           | N/A                                                                     | AK098562     |       | 1.872 | 0.636 |       |       | 1.059 | 0.42                                                                       |                                                                                                                   |
| DKFZp434E092  | hypothetical protein cDNA DKFZp434E092 (from clone DKFZp                | AL834175     |       | 1.889 | 0.582 |       |       | 1.042 | 0.364                                                                      |                                                                                                                   |
| TREML4        | triggering receptor expressed on myeloid cells-like 4                   | NM_198153    |       | 1.169 | 0.642 |       |       | 1.761 | 0.727                                                                      |                                                                                                                   |
| NUDT10        | nudix (nucleoside diphosphate linked moiety X)-type motif 10            | NM_153183    |       | 1.44  | 1.288 |       |       | 1.489 | 0.708                                                                      | Intracellular signaling cascade. Calcium-mediated signaling. Cyclic-nucleotide-mediated signaling.                |
| N/A           | Unknown (protein for MGC:62031)                                         | BC056262     |       | 1.138 | 0.353 |       |       | 1.791 | 0.369                                                                      | Transport.                                                                                                        |
| LOC115648     | similar to hypothetical protein FLJ13659                                | NM_145326    |       | 1.013 | 0.644 | 1.915 | 0.616 |       |                                                                            | Regulation of transcription, DNA-dependent.                                                                       |
| zfp31         | zinc finger protein zfp31                                               | U71600       |       | 1.83  | 0.6   |       |       | 1.096 | 0.622                                                                      |                                                                                                                   |
| DKFZp667N0215 | hypothetical protein cDNA DKFZp667N0215 (from clone DKFZ                | BX640915     |       | 1.848 | 0.842 | 1.078 | 0.867 |       |                                                                            |                                                                                                                   |
| OTOP2         | otopetrin 2                                                             | NM_178160    |       |       |       | 1.681 | 0.587 | 1.244 | 0.563                                                                      |                                                                                                                   |
| N/A           | N/A                                                                     | AK094783     |       | 1.494 | 0.596 |       |       | 1.431 | 0.345                                                                      |                                                                                                                   |
| N/A           | hypothetical protein                                                    | AL035288     |       | 1.011 | 0.594 |       |       | 1.91  | 0.408                                                                      |                                                                                                                   |
| USH1G         | Usher syndrome 1G protein                                               | NM_173477    |       |       |       | 1.694 | 0.755 | 1.219 | 0.623                                                                      |                                                                                                                   |
| FLJ35429      | hypothetical protein FLJ35429                                           | NM_001003807 |       | 1.374 | 0.764 |       |       | 1.538 | 0.395                                                                      |                                                                                                                   |
| C20orf39      | chromosome 20 open reading frame 39                                     | NM_024893    |       |       |       | 1.156 | 0.483 | 1.754 | 0.887                                                                      |                                                                                                                   |
| KCN33         | potassium voltage-gated channel delayed-rectifier protein S3            | NM_002252    | 1.196 | 0.826 | 1.575 | 1.003 |       | 1.334 | 0.998                                                                      | Cation transport. Potassium ion transport.                                                                        |
| GFRA3         | GDNF family receptor alpha 3 preproprotein                              | NM_001496    |       |       |       | 1.192 | 0.664 | 1.714 | 0.389                                                                      | Signal transduction. Peripheral nervous system development.                                                       |
| DKFZp686O1754 | hypothetical protein cDNA DKFZp686O1754 (from clone DKFZ                | BX640902     |       | 1.728 | 1.281 |       |       | 1.178 | 0.967                                                                      |                                                                                                                   |
| BPESC1        | * blepharophimosis, epicanthus inversus and ptosis, candidate           | NM_021812    |       | 1.14  | 0.628 |       |       | 1.766 | 0.543                                                                      |                                                                                                                   |
| EPHA8         | ephrin receptor EphA8 precursor                                         | NM_020526    |       | 1.158 | 0.804 |       |       | 1.747 | 0.763                                                                      | Protein amino acid phosphorylation. Protein amino acid phosphorylation.                                           |
| PITX2         | paired-like homeodomain transcription factor 2 isoform c                | NM_000325    |       | 2.905 | 0.667 |       |       |       |                                                                            | Regulation of transcription, DNA-dependent. Development. Determination of left/right symmetry. Organogenesis.     |
| CYP2S1        | * cytochrome P450, family 2, subfamily S, polypeptide 1*                | NM_030622    | 1.179 | 0.705 | 1.891 | 0.806 |       | 1.012 | 0.681                                                                      | Electron transport. Transport.                                                                                    |
| C13orf25      | chromosome 13 open reading frame 25 isoform B                           | NM_213723    |       | 2.901 | 1.485 |       |       |       |                                                                            |                                                                                                                   |
| N/A           | N/A                                                                     | BX640632     |       |       |       | 1.873 | 0.684 | 1.025 | 0.749                                                                      |                                                                                                                   |
| EDAR          | ectodysplasin A receptor                                                | NM_022336    |       | 1.25  | 0.459 |       |       | 1.648 | 0.415                                                                      | Apoptosis. Signal transduction. Epidermis development. Cell differentiation.                                      |
| MRC1          | mannose receptor C type 1 precursor                                     | NM_002438    |       | 1.472 | 0.519 |       |       | 1.425 | 0.381                                                                      | Receptor mediated endocytosis. Pinocytosis.                                                                       |
| CDH5          | * cadherin 5, type 2 preproprotein*                                     | NM_001795    |       | 1.533 | 0.499 |       |       | 1.363 | 0.504                                                                      | Cell adhesion. Homophilic cell adhesion,                                                                          |
| MGC17299      | hypothetical protein MGC17299                                           | NM_144626    |       | 1.638 | 0.538 |       |       | 1.257 | 0.549                                                                      |                                                                                                                   |

|               |                                                                   |              |       |       |       |       |       |       |                                                                 |                                                                                                                   |                                                                                                    |
|---------------|-------------------------------------------------------------------|--------------|-------|-------|-------|-------|-------|-------|-----------------------------------------------------------------|-------------------------------------------------------------------------------------------------------------------|----------------------------------------------------------------------------------------------------|
| TMIE          | transmembrane inner ear protein                                   | NM_147196    |       |       | 1.153 | 0.483 | 1.741 | 0.68  |                                                                 |                                                                                                                   |                                                                                                    |
| POU3F1        | transcriptional regulator                                         | S81257       |       |       | 1.595 | 0.902 | 1.297 | 0.576 | Regulation of transcription, DNA-dependent. Nerve ensheathment. |                                                                                                                   |                                                                                                    |
| HCRTR2        | orexin receptor 2                                                 | NM_001526    |       |       | 1.641 | 1.135 |       | 1.251 | 0.693                                                           | Signal transduction. Neuropeptide signaling pathway. Synaptic transmission. Feeding behavior.                     |                                                                                                    |
| GPR128        | G protein-coupled receptor 128                                    | NM_032787    |       |       | 1.42  | 1.031 |       | 1.47  | 0.362                                                           |                                                                                                                   |                                                                                                    |
| OLIG1         | oligodendrocyte transcription factor 1                            | BC033290     |       |       | 1.738 | 0.561 |       | 1.151 | 0.727                                                           | Regulation of transcription, DNA-dependent. Development.                                                          |                                                                                                    |
| N/A           | N/A                                                               | AK124823     |       |       |       |       | 1.135 | 0.332 | 1.752                                                           | 0.735                                                                                                             |                                                                                                    |
| CALML5        | calmodulin-like skin protein                                      | BC039172     |       |       |       |       |       | 2.883 | 0.376                                                           | Signal transduction. Epidermis development.                                                                       |                                                                                                    |
| CABP7         | calcium binding protein 7                                         | NM_182527    |       |       |       |       | 1.164 | 0.581 | 1.711                                                           | 0.929                                                                                                             |                                                                                                    |
| SLC9A3        | solute carrier family 9 (sodium/hydrogen exchanger), isoform 3    | NM_004174    |       |       |       |       | 1.216 | 0.877 | 1.655                                                           | 0.977                                                                                                             | Sodium ion transport. Regulation of pH.                                                            |
| N/A           | neurogenin extracellular slit protein Slit2                       | AF055585     |       |       | 1.784 | 0.527 |       | 1.085 | 0.585                                                           | Ureteric bud development. Chemotaxis. Cell adhesion. G-protein coupled receptor protein signaling pathway.        |                                                                                                    |
| ARMCX2        | ALEX2 protein                                                     | NM_177949    |       |       | 1.669 | 0.482 |       | 1.199 | 0.945                                                           |                                                                                                                   |                                                                                                    |
| TACR1         | tachykinin receptor 1 isoform long                                | NM_001058    | 1.172 | 1.335 | 1.841 | 0.944 | 1.026 | 0.666 |                                                                 | Inflammatory response. Signal transduction. G-protein coupled receptor protein signaling pathway.                 |                                                                                                    |
| ADRBK2        | beta adrenergic receptor kinase 2                                 | NM_005160    |       |       | 1.184 | 0.542 |       | 1.683 | 0.656                                                           | Protein amino acid phosphorylation. Signal transduction.                                                          |                                                                                                    |
| N/A           | carbonic anhydrase VII short form                                 | AY075020     |       |       | 1.018 | 0.599 |       | 1.848 | 0.724                                                           | One-carbon compound metabolism.                                                                                   |                                                                                                    |
| CSEN          | Kv channel interacting protein 3                                  | NM_013434    | 1.996 | 1.732 | 1.078 | 0.876 |       | 1.786 | 0.739                                                           | Regulation of transcription. Signal transduction.                                                                 |                                                                                                    |
| PRKGZ         | * protein kinase C, zeta*                                         | NM_002744    |       |       | 1.312 | 0.778 |       | 1.549 | 0.834                                                           | Protein amino acid phosphorylation. Anti-apoptosis. Intracellular signaling cascade.                              |                                                                                                    |
| HAO2          | hydroxyacid oxidase 2                                             | NM_001005783 |       |       | 1.748 | 1.305 |       | 1.112 | 0.667                                                           | Fatty acid alpha-oxidation. Electron transport.                                                                   |                                                                                                    |
| KIAA0711      | KIAA0711 protein                                                  | AB018254     |       |       | 1.693 | 0.789 |       | 1.166 | 0.654                                                           |                                                                                                                   |                                                                                                    |
| GLP1R         | glucagon-like peptide 1 receptor                                  | NM_002062    |       |       |       |       | 1.194 | 0.499 | 1.663                                                           | 0.7                                                                                                               | Generation of precursor metabolites and energy. Signal transduction. Adenylate cyclase activation. |
| KIAA0523      | KIAA0523 protein                                                  | NM_015253    |       |       |       |       | 1.153 | 0.622 | 1.701                                                           | 0.977                                                                                                             |                                                                                                    |
| CCR9          | chemokine (C-C motif) receptor 9 isoform A                        | NM_031200    |       |       | 1.407 | 0.77  |       | 1.447 | 0.815                                                           | Chemotaxis. Cellular defense response. Signal transduction. G-protein coupled receptor protein signaling pathway. |                                                                                                    |
| N/A           | N/A                                                               | AK090863     |       |       | 1.094 | 0.801 |       | 1.758 | 0.664                                                           |                                                                                                                   |                                                                                                    |
| KCNQ1DN       | KCNQ1 downstream neighbor                                         | NM_018722    |       |       | 1.627 | 1.095 |       | 1.224 | 0.652                                                           |                                                                                                                   |                                                                                                    |
| hp51CN        | inositol polyphosphate 5- phosphatase                             | X98429       |       |       | 1.735 | 0.359 |       | 1.116 | 0.318                                                           | Phosphate metabolism. Intracellular signaling cascade.                                                            |                                                                                                    |
| RDH12         | retinol dehydrogenase 12 (all-trans and 9-cis)                    | NM_152443    |       |       | 1.818 | 0.493 | 1.031 | 0.617 |                                                                 | Sensory perception. Metabolism. Retinol metabolism. Photoreceptor maintenance.                                    |                                                                                                    |
| DLEU7         | deleted in lymphocytic leukemia 7                                 | NM_198989    |       |       |       |       | 1.047 | 0.547 | 1.802                                                           | 0.688                                                                                                             |                                                                                                    |
| NPHS1         | nephrin                                                           | NM_004646    |       |       | 1.189 | 0.647 |       | 1.659 | 0.434                                                           | Cell adhesion. Excretion.                                                                                         |                                                                                                    |
| SCN2B         | * sodium channel, voltage-gated, type II, beta*                   | BC036793     |       |       | 1.249 | 0.548 |       | 1.594 | 0.555                                                           | Protein amino acid phosphorylation. Signal transduction. Alcohol metabolism. Lipid metabolism.                    |                                                                                                    |
| HUMCYT2A      | cytokeratin 2                                                     | NM_015848    |       |       | 1.223 | 1     |       | 1.619 | 0.308                                                           | Cytoskeleton organization and biogenesis.                                                                         |                                                                                                    |
| N/A           | neurocalcin                                                       | AF251061     | 1.63  | 1.594 | 1.692 | 0.489 |       | 1.149 | 0.568                                                           | Vesicle-mediated transport.                                                                                       |                                                                                                    |
| IFNA17        | * interferon, alpha 17*                                           | NM_021268    |       |       | 1.827 | 0.371 |       | 1.011 | 0.539                                                           | Defense response. Cell-cell signaling. Response to virus.                                                         |                                                                                                    |
| C21orf63      | chromosome 21 open reading frame 63                               | NM_058187    |       |       | 1.427 | 0.424 |       | 1.41  | 0.48                                                            |                                                                                                                   |                                                                                                    |
| PADI4         | * peptidyl arginine deiminase, type IV*                           | NM_012387    |       |       | 1.025 | 0.804 |       | 1.808 | 0.723                                                           | Protein modification. Protein modification.                                                                       |                                                                                                    |
| CRYGD         | * crystallin, gamma D*                                            | NM_006891    |       |       | 1.544 | 0.345 |       | 1.288 | 0.612                                                           | Sensory perception. Visual perception.                                                                            |                                                                                                    |
| ASCL1         | achaete-scute complex homolog-like 1                              | BC004425     |       |       | 1.276 | 0.831 |       | 1.556 | 0.837                                                           | Regulation of transcription from RNA polymerase II promoter. Neurogenesis. Cell differentiation.                  |                                                                                                    |
| D4S234E       | brain neuron cytoplasmic protein 1                                | NM_014392    |       |       |       |       | 1.433 | 0.497 | 1.398                                                           | 0.854                                                                                                             | Dopamine receptor signaling pathway.                                                               |
| DKFZp434N092  | hypothetical proteincDNA DKFZp434N092 (from clone DKFZp AL713690  |              |       |       | 1.433 | 1.079 | 1.396 | 0.686 |                                                                 |                                                                                                                   |                                                                                                    |
| C14orf162     | chromosome 14 open reading frame 162                              | NM_020181    |       |       | 1.236 | 0.714 |       | 1.592 | 0.591                                                           |                                                                                                                   |                                                                                                    |
| FLJ11127      | hypothetical protein FLJ11127                                     | NM_019018    |       |       | 1.512 | 0.712 |       | 1.314 | 0.701                                                           |                                                                                                                   |                                                                                                    |
| FLJ44790      | FLJ44790 protein                                                  | NM_001001691 |       |       | 1.003 | 0.484 |       | 1.823 | 0.795                                                           |                                                                                                                   |                                                                                                    |
| ZG16          | zymogen granule protein 16                                        | BC029149     |       |       |       |       |       | 2.824 | 0.756                                                           |                                                                                                                   |                                                                                                    |
| N/A           | N/A                                                               | AK128214     |       |       | 1.105 | 0.855 |       | 1.718 | 0.438                                                           | Protein amino acid phosphorylation. Signal transduction. Alcohol metabolism. Lipid metabolism.                    |                                                                                                    |
| N/A           | SAMK3000                                                          | AY358539     | 2.035 | 1.445 | 1.251 | 0.766 |       | 1.57  | 0.826                                                           |                                                                                                                   |                                                                                                    |
| SLC16A11      | solute carrier family 16, member 11*                              | NM_153357    |       |       |       |       | 1.337 | 0.576 | 1.483                                                           | 0.427                                                                                                             | Transport.                                                                                         |
| N/A           | N/A                                                               | AK097437     |       |       | 1.156 | 0.748 |       | 1.663 | 0.609                                                           |                                                                                                                   |                                                                                                    |
| FIGLA         | factor in the germline alpha                                      | NM_001004311 |       |       | 1.755 | 0.256 | 1.064 | 0.462 |                                                                 |                                                                                                                   |                                                                                                    |
| N/A           | Unknown (protein for MGC:64921)                                   | BC058890     |       |       | 1.085 | 0.382 |       | 1.733 | 0.183                                                           |                                                                                                                   |                                                                                                    |
| NOS2A         | nitric oxide synthase 2A isoform 1                                | NM_000625    |       |       |       |       | 1.34  | 0.698 | 1.477                                                           | 0.478                                                                                                             | Electron transport. Superoxide metabolism. Nitric oxide biosynthesis. Inflammatory response.       |
| DKFZp434I0916 | hypothetical proteincDNA DKFZp434I0916 (from clone DKFZp AL136772 |              |       |       | 1.644 | 0.9   |       | 1.173 | 0.451                                                           | Apoptosis. Metabolism. Heparan sulfate proteoglycan metabolism.                                                   |                                                                                                    |
| MRC1          | mannose receptor C type 1 precursor                               | NM_002438    |       |       | 1.547 | 0.522 |       | 1.269 | 0.47                                                            | Receptor mediated endocytosis. Pinocytosis.                                                                       |                                                                                                    |
| DKFZp451N061  | hypothetical proteincDNA DKFZp451N061 (from clone DKFZp BX537998  |              |       |       | 1.791 | 1.241 |       | 1.025 | 0.48                                                            | Carbohydrate metabolism. Protein amino acid phosphorylation. Regulation of striated muscle contraction.           |                                                                                                    |
| LOC401498     | similar to RIKEN A930001M12                                       | NM_212558    |       |       |       |       | 1.415 | 0.407 | 1.399                                                           | 0.827                                                                                                             |                                                                                                    |
| KIAA1747      | KIAA1747 protein                                                  | AB051534     |       |       | 1.058 | 0.428 |       | 1.755 | 0.35                                                            |                                                                                                                   |                                                                                                    |
| DKFZp547G0215 | hypothetical protein DKFZp547G0215                                | NM_173643    |       |       | 1.601 | 0.789 |       | 1.212 | 0.482                                                           |                                                                                                                   |                                                                                                    |
| DKFZp761G0122 | hypothetical proteincDNA DKFZp761G0122 (from clone DKFZ AL713743  |              |       |       | 1.787 | 0.739 | 1.023 | 0.657 |                                                                 |                                                                                                                   |                                                                                                    |
| BARX2         | BarH-like homeobox 2                                              | NM_003658    |       |       | 1.714 | 0.545 |       | 1.091 | 0.462                                                           | Regulation of transcription, DNA-dependent. Transcription from RNA polymerase II promoter.                        |                                                                                                    |

|           |                                                                 |              |       |       |       |       |       |                                                                                                                            |                                                                                                |
|-----------|-----------------------------------------------------------------|--------------|-------|-------|-------|-------|-------|----------------------------------------------------------------------------------------------------------------------------|------------------------------------------------------------------------------------------------|
| LYZL4     | lysozyme-like 4                                                 | NM_144634    | 1.764 | 0.419 |       | 1.039 | 0.281 | Carbohydrate metabolism. Cell wall catabolism. Cytolysis. Defense response to bacteria.                                    |                                                                                                |
| ERAS      | small GTPase protein E-Ras                                      | NM_181532    | 1.012 | 0.364 |       | 1.789 | 0.754 |                                                                                                                            |                                                                                                |
| RAG1      | recombination activating gene 1                                 | NM_000448    | 1.664 | 0.601 |       | 1.136 | 0.449 | DNA recombination. Immune response. Hemocyte development. Protein ubiquitination.                                          |                                                                                                |
| UNQ5792   | INPE5792                                                        | NM_207375    | 2.798 | 0.369 |       |       |       |                                                                                                                            |                                                                                                |
| DEFB4     | * defensin, beta 4 precursor*                                   | NM_004942    | 1.3   | 1.12  |       | 1.498 | 0.308 | Chemotaxis. Immune response. G-protein coupled receptor protein signaling pathway. Response to pest, pathogen or parasite. |                                                                                                |
| C10orf118 | CTCL tumor antigen L14-2                                        | NM_018017    | 2.797 | 0.621 |       |       |       |                                                                                                                            |                                                                                                |
| STAC2     | SH3 and cysteine rich domain 2                                  | NM_198993    | 1.203 | 0.514 |       | 1.592 | 0.612 | Protein amino acid phosphorylation. Signal transduction. Alcohol metabolism. Lipid metabolism.                             |                                                                                                |
| KRT2A     | keratin 2a                                                      | NM_000423    | 1.319 | 1.032 |       | 1.475 | 0.703 | Epidermis development.                                                                                                     |                                                                                                |
| GIPC2     | PDZ domain protein GIPC2                                        | NM_017655    | 1.662 | 1.404 |       | 1.132 | 0.611 |                                                                                                                            |                                                                                                |
| MOGAT1    | monoacylglycerol O-acyltransferase 1                            | NM_058165    | 1.735 | 0.862 |       | 1.058 | 0.638 |                                                                                                                            |                                                                                                |
| N/A       | Unknown (protein for IMAGE:4271781)                             | BC017937     | 1.16  | 0.527 |       | 1.632 | 0.356 | Protein amino acid phosphorylation. Signal transduction. Alcohol metabolism. Lipid metabolism.                             |                                                                                                |
| N/A       | G protein-coupled receptor PGR27                                | AY255609     | 1.534 | 0.304 |       | 1.258 | 0.483 |                                                                                                                            |                                                                                                |
| N/A       | N/A                                                             | AK124560     |       |       | 1.218 | 0.422 | 1.574 | 0.421                                                                                                                      |                                                                                                |
| FZD3      | frizzled 3                                                      | NM_017412    | 1.76  | 0.956 |       | 1.032 | 0.691 | G-protein coupled receptor protein signaling pathway. Frizzled signaling pathway. Development. Cell proliferation.         |                                                                                                |
| TRAR4     | trace amine receptor 4                                          | NM_175067    | 1.685 | 0.974 |       | 1.105 | 0.749 |                                                                                                                            |                                                                                                |
| N/A       | N/A                                                             | AK125849     | 1.014 | 0.486 |       | 1.774 | 0.594 |                                                                                                                            |                                                                                                |
| N/A       | N/A                                                             | AK125824     | 1.473 | 0.579 |       | 1.315 | 0.464 | Amino acid metabolism.                                                                                                     |                                                                                                |
| SNCA      | alpha-synuclein isoform NACP140                                 | NM_000345    | 2.786 | 0.919 |       |       |       | Anti-apoptosis. Central nervous system development.                                                                        |                                                                                                |
| OB1       | odd homeobox 1 protein isoform Aalternatively spliced.          | AF492675     | 2.785 | 0.677 |       |       |       | Regulation of transcription, DNA-dependent. Development.                                                                   |                                                                                                |
| N/A       | N/A                                                             | AK127451     | 1.542 | 1.045 |       | 1.243 | 0.688 |                                                                                                                            |                                                                                                |
| CLPS      | colipase preproprotein                                          | NM_001832    | 1.269 | 0.57  |       | 1.515 | 0.573 | Digestion. Lipid catabolism.                                                                                               |                                                                                                |
| IRX5      | iroquois homeobox protein 5                                     | NM_005853    | 1.37  | 0.466 |       | 1.413 | 0.879 | Regulation of transcription, DNA-dependent.                                                                                |                                                                                                |
| EGFL9     | EGF-like-domain, multiple 9*                                    | NM_023932    |       |       | 1.582 | 0.565 | 1.201 | 0.698                                                                                                                      |                                                                                                |
| PRODH     | proline dehydrogenase (oxidase) 1                               | NM_016335    | 1.375 | 0.756 |       | 1.408 | 0.459 | Glutamate biosynthesis. Proline catabolism. Induction of apoptosis by oxidative stress.                                    |                                                                                                |
| KRTAP5-9  | keratin associated protein 5-9                                  | AJ628246     | 1.229 | 0.662 |       | 1.553 | 0.504 |                                                                                                                            |                                                                                                |
| FUT3      | fucosyltransferase 3 (galactoside 3(4)-L-fucosyltransferase, Le | NM_000149    |       |       | 1.009 | 0.526 | 1.773 | 0.441                                                                                                                      | Carbohydrate metabolism. Protein amino acid glycosylation.                                     |
| TRH       | thyrotropin-releasing hormone                                   | NM_007117    |       |       | 1.332 | 0.721 | 1.445 | 0.654                                                                                                                      | Signal transduction. Cell-cell signaling. Hormone-mediated signaling.                          |
| TRAR5     | G protein-coupled receptor 102                                  | NM_053278    | 1.39  | 1.116 |       | 1.387 | 1.001 |                                                                                                                            |                                                                                                |
| LRG1      | leucine-rich alpha-2-glycoprotein 1                             | NM_052972    |       |       | 1.016 | 0.349 | 1.761 | 0.733                                                                                                                      | Protein amino acid phosphorylation. Signal transduction. Alcohol metabolism. Lipid metabolism. |
| LOC284680 | hypothetical protein LOC284680                                  | NM_182581    | 1.519 | 0.477 |       | 1.258 | 0.482 |                                                                                                                            |                                                                                                |
| IFNA21    | * interferon, alpha 21*                                         | NM_002175    | 1.744 | 0.649 |       | 1.031 | 0.709 | Defense response. Cell-cell signaling. Response to virus.                                                                  |                                                                                                |
| CRYBB2    | * crystallin, beta B2*                                          | NM_000496    | 1.364 | 1.412 |       | 1.41  | 0.816 | Sensory perception. Visual perception.                                                                                     |                                                                                                |
| SFTPA1    | SFTPA1 protein                                                  | BC026229     | 1.144 | 0.709 |       | 1.629 | 0.393 | Phosphate transport. Respiratory gaseous exchange. Regulation of liquid surface tension.                                   |                                                                                                |
| CEL       | bile salt-activated lipase                                      | M54994       | 1.094 | 1.404 | 1.109 | 0.47  | 1.663 | 0.675                                                                                                                      |                                                                                                |
| MGC44903  | telomeric TBC1 domain family member 3-like                      | NM_001001418 | 1.07  | 0.266 |       | 1.699 | 0.163 |                                                                                                                            |                                                                                                |
| FLJ45273  | FLJ45273 protein                                                | NM_198461    | 1.581 | 0.528 |       | 1.187 | 0.413 |                                                                                                                            |                                                                                                |
| MGC33951  | hypothetical protein MGC33951                                   | NM_152448    | 1.542 | 0.547 |       | 1.225 | 0.226 |                                                                                                                            |                                                                                                |
| CX40.1    | connexin40.1                                                    | NM_153368    | 1.213 | 1.203 |       | 1.553 | 0.36  | Cell communication.                                                                                                        |                                                                                                |
| ACADL     | * acyl-Coenzyme A dehydrogenase, long chain precursor*          | NM_001608    | 1.766 | 0.684 |       | 1     | 0.437 | Electron transport. Lipid metabolism. Fatty acid metabolism.                                                               |                                                                                                |
| LOC253012 | hypothetical protein LOC253012                                  | NM_198151    | 1.183 | 0.488 |       | 1.582 | 0.933 |                                                                                                                            |                                                                                                |
| IFNA7     | * interferon, alpha 7*                                          | NM_021057    | 1.215 | 0.312 |       | 1.547 | 0.22  | Defense response. Cell-cell signaling. Response to virus.                                                                  |                                                                                                |
| BCL11B    | B-cell CLL/lymphoma 11B isoform 1                               | NM_138576    | 1.681 | 0.675 |       | 1.078 | 0.629 | Regulation of transcription, DNA-dependent.                                                                                |                                                                                                |
| ADCY8     | adenylate cyclase 8                                             | NM_001115    |       |       | 1.302 | 0.458 | 1.457 | 0.477                                                                                                                      | CAMP biosynthesis. Intracellular signaling cascade. Learning and/or memory.                    |
| TRIM43    | tripartite motif-containing 43                                  | NM_138800    | 1.472 | 0.739 |       | 1.287 | 0.782 |                                                                                                                            |                                                                                                |
| MTUS1     | mitochondrial tumor suppressor 1 isoform 3                      | NM_001001927 | 1.646 | 1.096 |       | 1.11  | 0.712 |                                                                                                                            |                                                                                                |
| BTK       | Bruton agammaglobulinemia tyrosine kinase                       | NM_000061    | 1.595 | 1.035 |       | 1.16  | 0.385 | Protein amino acid phosphorylation. Mesoderm development. Induction of apoptosis by extracellular signals.                 |                                                                                                |
| TIAM1     | T-cell lymphoma invasion and metastasis 1                       | NM_003253    | 1.078 | 0.792 | 1.043 | 0.751 | 1.708 | 1.235                                                                                                                      | Intracellular signaling cascade.                                                               |
| WNT16     | * wntless-type MMTV integration site family, member 16 isoform  | NM_057168    | 1.179 | 0.483 |       | 1.57  | 0.363 | Frizzled-2 signaling pathway. Cell-cell signaling. Development.                                                            |                                                                                                |
| FAM26A    | * family with sequence similarity 26, member A*                 | NM_182494    | 1.679 | 0.782 |       | 1.07  | 0.776 |                                                                                                                            |                                                                                                |
| FLJ46608  | FLJ46608 protein                                                | NM_001004308 | 1.537 | 0.382 |       | 1.209 | 0.227 |                                                                                                                            |                                                                                                |
| CHST13    | carbohydrate (chondroitin 4) sulfotransferase 13                | NM_152889    | 1.234 | 0.379 |       | 1.51  | 0.916 | Carbohydrate metabolism. Chondroitin sulfate biosynthesis.                                                                 |                                                                                                |
| N/A       | N/A                                                             | AK127184     | 1.665 | 0.541 |       | 1.078 | 0.225 |                                                                                                                            |                                                                                                |
| SSB4      | SPRY domain-containing SOCS box protein SSB-4                   | NM_080862    | 1.049 | 0.861 | 1.238 | 0.638 | 1.505 | 0.99                                                                                                                       | Intracellular signaling cascade.                                                               |
| CHST1     | carbohydrate (keratan sulfate Gal-6) sulfotransferase 1         | NM_003654    | 1.033 | 0.74  |       | 1.71  | 0.92  | Polysaccharide metabolism. Galactose metabolism. Inflammatory response. Keratan sulfate metabolism.                        |                                                                                                |
| SLC6A13   | * solute carrier family 6 (neurotransmitter transporter, GABA), | NM_016615    | 1.006 | 0.725 |       | 1.736 | 0.758 | Neurotransmitter transport. Amino acid transport.                                                                          |                                                                                                |
| KRTAP10-2 | keratin associated protein 10-2                                 | NM_198693    | 1.092 | 0.767 |       | 1.647 | 0.681 |                                                                                                                            |                                                                                                |

|               |                                                                                      |              |       |       |       |       |       |       |                                                                                                                              |
|---------------|--------------------------------------------------------------------------------------|--------------|-------|-------|-------|-------|-------|-------|------------------------------------------------------------------------------------------------------------------------------|
| STK32A        | serine/threonine kinase 32A                                                          | NM_145001    | 1.466 | 0.478 |       |       | 1.269 | 0.509 |                                                                                                                              |
| ADCYAP1R1     | type I adenylate cyclase activating polypeptide receptor precursor                   | NM_001118    |       |       | 1.193 | 0.962 | 1.541 | 1.04  | G-protein coupled receptor protein signaling pathway. Spermatogenesis. Cell differentiation.                                 |
| SIGLEC7       | sialic acid binding Ig-like lectin 7                                                 | NM_014385    | 1.155 | 0.745 |       |       | 1.576 | 0.738 | Cell adhesion.                                                                                                               |
| VDR           | * vitamin D (1,25-dihydroxyvitamin D3) receptor*                                     | NM_000376    | 1.495 | 0.612 |       |       | 1.23  | 0.531 | Transcription. Regulation of transcription, DNA-dependent. Signal transduction.                                              |
| PNCK          | pregnancy upregulated non-ubiquitously expressed CaM kinase                          | NM_198452    | 1.129 | 0.624 |       |       | 1.595 | 0.73  | Protein amino acid phosphorylation.                                                                                          |
| ACCN1         | neuronal amiloride-sensitive cation channel 1 isoform 1                              | NM_183377    |       |       | 1.127 | 0.517 | 1.595 | 0.478 | Ion transport. Sodium ion transport. Synaptic transmission. Central nervous system development.                              |
| ABCG5         | sterolin 1                                                                           | NM_022436    | 1.023 | 0.695 |       |       | 1.698 | 0.902 | Transport. Cholesterol absorption.                                                                                           |
| PALMD         | palmdelphin                                                                          | NM_017734    | 1.468 | 0.809 | 1.25  | 0.984 |       |       | Regulation of cell shape.                                                                                                    |
| MOGAT3        | monoacylglycerol O-acyltransferase 3                                                 | NM_178176    | 1.383 | 0.517 |       |       | 1.334 | 0.668 |                                                                                                                              |
| SPAG11        | N/A                                                                                  | NM_016512    | 1.27  | 0.608 |       |       | 1.445 | 0.97  | Defense response. Spermatogenesis. Response to pest, pathogen or parasite.                                                   |
| N/A           | N/A                                                                                  | AK091660     | 1.254 | 1.003 |       |       | 1.459 | 0.901 |                                                                                                                              |
| N/A           | N/A                                                                                  | AK095603     |       |       | 1.594 | 0.434 | 1.112 | 0.391 |                                                                                                                              |
| MAST1         | microtubule associated serine/threonine kinase 1                                     | NM_014975    | 1.327 | 0.822 |       |       | 1.379 | 0.615 | DNA metabolism. Apoptosis. Development.                                                                                      |
| KCNJ10        | potassium inwardly-rectifying channel J10                                            | NM_002241    | 1.675 | 0.877 |       |       | 1.031 | 0.747 | Ion transport. Potassium ion transport.                                                                                      |
| KRTAP5-2      | keratin associated protein 5-2                                                       | NM_001004325 | 1.097 | 0.408 |       |       | 1.605 | 0.505 |                                                                                                                              |
| PRKWINK3      | * protein kinase, lysine deficient 3 isoform 1*                                      | NM_020922    | 1.286 | 0.466 |       |       | 1.414 | 0.499 | Protein amino acid phosphorylation. Protein amino acid phosphorylation. Protein kinase cascade.                              |
| KIAA1144      | KIAA1144 protein                                                                     | AB032970     | 1.36  | 0.783 |       |       | 1.338 | 0.955 | Cation transport. Potassium ion transport.                                                                                   |
| RBP7          | RBP7 protein                                                                         | BC033883     | 1.255 | 0.558 |       |       | 1.442 | 0.692 | Transport.                                                                                                                   |
| OPRL1         | OPRL1 protein                                                                        | BC038433     | 1.482 | 0.855 |       |       | 1.214 | 0.786 | Signal transduction. G-protein coupled receptor protein signaling pathway. Positive regulation.                              |
| MGC75556      | hypothetical gene supported by BC063653                                              | NM_001004350 |       |       | 1.1   | 0.427 | 1.595 | 0.425 |                                                                                                                              |
| KLF15         | Kruppel-like factor 15                                                               | NM_014079    | 1.645 | 0.451 |       |       | 1.05  | 1.097 | Transcription. Regulation of transcription, DNA-dependent.                                                                   |
| FLJ31952      | hypothetical protein FLJ31952                                                        | NM_144682    | 2.695 | 0.566 |       |       |       |       | Protein amino acid phosphorylation. Signal transduction. Alcohol metabolism. Lipid metabolism.                               |
| SPDEF         | SAM pointed domain containing ets transcription factor                               | BC021299     | 1.549 | 0.793 |       |       | 1.145 | 0.6   | Regulation of transcription, DNA-dependent. Development.                                                                     |
| TOM1L1        | target of myb1-like 1                                                                | NM_005486    | 1.691 | 1.562 |       |       | 1.002 | 0.777 | Intracellular protein transport. Intra-Golgi transport.                                                                      |
| SLC4A11       | solute carrier family 4 member 11                                                    | NM_032034    |       |       | 1.482 | 0.682 | 1.209 | 0.871 | Anion transport.                                                                                                             |
| NCF4          | * neutrophil cytosolic factor 4 (40kD), isoform 2*                                   | BC002798     | 1.23  | 0.327 |       |       | 1.46  | 0.518 | Electron transport. Defense response. Intracellular signaling cascade.                                                       |
| N/A           | N/A                                                                                  | AK124965     | 1.545 | 0.385 |       |       | 1.144 | 0.395 |                                                                                                                              |
| N/A           | N/A                                                                                  | AJ007292     |       |       | 1.233 | 0.424 | 1.456 | 0.689 | Cell-cell signaling.                                                                                                         |
| ATP12A        | * ATPase, H+/K+ transporting, nongastric, alpha polypeptide*                         | NM_001676    | 1.574 | 0.392 |       |       | 1.115 | 0.506 | Potassium ion transport. Metabolism. Proton transport.                                                                       |
| GPR45         | G protein-coupled receptor 45                                                        | NM_007227    | 1.191 | 1.023 |       |       | 1.497 | 0.531 | Signal transduction. G-protein coupled receptor protein signaling pathway. Neurogenesis.                                     |
| CSPG2         | chondroitin sulfate proteoglycan 2 (versican)                                        | NM_004385    | 2.688 | 0.561 |       |       |       |       | Development. Cell recognition.                                                                                               |
| HPX-5         | N/A                                                                                  | X74862       | 1.067 | 0.406 |       |       | 1.621 | 0.395 |                                                                                                                              |
| C1QL2         | complement component 1, q subcomponent-like 2*                                       | NM_182528    |       |       | 1.163 | 0.524 | 1.524 | 0.451 |                                                                                                                              |
| KCNG4         | * potassium voltage-gated channel, subfamily G, member 4 (from clone DKFZ1 AL137448) | NM_133490    | 1.028 | 0.847 |       |       | 1.658 | 0.47  |                                                                                                                              |
| DKFZp434B2328 | hypothetical protein cDNA DKFZp434B2328 (from clone DKFZ1 AL137448)                  |              | 1.223 | 0.501 |       |       | 1.462 | 0.669 |                                                                                                                              |
| IGFL1         | insulin growth factor-like family member 1                                           | NM_198541    |       |       |       |       | 2.683 | 0.571 |                                                                                                                              |
| KRTHB5        | keratin, hair, basic, 5*                                                             | NM_002283    |       |       |       |       | 2.681 | 0.383 | Epidermis development.                                                                                                       |
| KRTAP10-2     | keratin associated protein KAP10.2                                                   | AJ566381     | 1.013 | 0.815 |       |       | 1.667 | 0.49  |                                                                                                                              |
| CCL4L         | chemokine (C-C motif) ligand 4-like precursor                                        | NM_001001435 | 1.179 | 0.398 |       |       | 1.501 | 0.757 | Cell motility. Chemotaxis. Inflammatory response. Cell adhesion. Establishment and/or maintenance of cell polarity.          |
| CD22          | CD22 antigen                                                                         | NM_001771    |       |       |       |       | 2.678 | 0.626 | Immune response. Cell-cell adhesion. Antimicrobial humoral response.                                                         |
| PLEKHK1       | * pleckstrin homology domain containing, family K member 1*                          | NM_145307    | 1.618 | 0.904 |       |       | 1.058 | 0.843 | Signal transduction.                                                                                                         |
| HLA-Dw12      | cell surface glycoprotein                                                            | M57650       | 1.134 | 0.944 |       |       | 1.542 | 1.159 | Immune response. Antigen presentation, exogenous antigen.                                                                    |
| KIAA1900      | KIAA1900                                                                             | NM_052904    | 1.629 | 0.58  | 1.042 | 0.689 |       |       |                                                                                                                              |
| KIAA1210      | KIAA1210 protein                                                                     | AB033036     | 1.588 | 0.921 |       |       | 1.083 | 0.685 |                                                                                                                              |
| DCAMKL1       | doublecortin and CaM kinase-like 1                                                   | NM_004734    | 1.564 | 0.77  |       |       | 1.107 | 0.899 | Protein amino acid phosphorylation. Intracellular signaling cascade. Central nervous system development. Endosome transport. |
| N/A           | Unknown (protein for MGC:34907)                                                      | BC027486     | 1.018 | 0.873 |       |       | 1.652 | 0.702 |                                                                                                                              |
| N/A           | N/A                                                                                  | AK095339     | 1.108 | 0.398 |       |       | 1.562 | 0.351 |                                                                                                                              |
| N/A           | N/A                                                                                  | AK026467     |       |       |       |       | 2.67  | 0.659 | Protein amino acid phosphorylation. Signal transduction. Alcohol metabolism. Lipid metabolism.                               |
| CHST4         | carbohydrate (N-acetylglucosamine 6-O) sulfotransferase 4                            | NM_005769    | 1.608 | 0.494 |       |       | 1.062 | 0.478 | Carbohydrate metabolism. N-acetylglucosamine metabolism. Sulfur metabolism. Inflammatory response.                           |
| N/A           | N/A                                                                                  | AK095105     | 1.178 | 0.256 |       |       | 1.489 | 0.355 |                                                                                                                              |
| HLA-DQB2      | * major histocompatibility complex, class II, DQ beta 2*                             | NM_182549    | 1.46  | 0.422 |       |       | 1.206 | 0.46  | Immune response. Immune response. Antigen presentation, exogenous antigen.                                                   |
| GPR63         | G protein-coupled receptor 63                                                        | NM_030784    | 2.31  | 1.582 |       |       | 1.03  | 0.909 | Signal transduction. G-protein coupled receptor protein signaling pathway.                                                   |
| AAA1          | AAA1 protein isoform IV                                                              | NM_207286    | 2.66  | 0.643 |       |       |       |       |                                                                                                                              |
| N/A           | N/A                                                                                  | AY358358     | 1.12  | 1.226 |       |       | 1.539 | 0.292 |                                                                                                                              |
| THBD          | thrombomodulin precursor                                                             | NM_000361    | 1.406 | 0.75  |       |       | 1.252 | 0.396 | Blood coagulation.                                                                                                           |
| LOC283677     | LOC283677 protein                                                                    | BC055412     | 1.254 | 1.081 |       |       | 1.404 | 0.431 |                                                                                                                              |

|               |                                                                    |           |       |       |       |       |       |       |                                                                                                         |
|---------------|--------------------------------------------------------------------|-----------|-------|-------|-------|-------|-------|-------|---------------------------------------------------------------------------------------------------------|
| N/A           | Rhesus polypeptide XIII                                            | X63097    | 1.418 | 0.311 |       |       | 1.239 | 0.587 |                                                                                                         |
| KIAA1394      | KIAA1394 protein                                                   | AB037815  |       |       |       | 1.188 | 0.859 | 1.469 | 0.703                                                                                                   |
| CAST          | cytomatrix protein p110                                            | NM_015576 | 1.319 | 0.867 |       |       |       | 1.338 | 0.804                                                                                                   |
| KCNJ5         | potassium inwardly-rectifying channel J5                           | NM_000890 | 1.586 | 0.871 | 1.069 | 0.398 |       |       |                                                                                                         |
| HAND2         | basic helix-loop-helix transcription factor HAND2                  | NM_021973 | 2.655 | 0.632 |       |       |       |       | Angiogenesis. Transcription. Regulation of transcription, DNA-dependent. Cell differentiation.          |
| N/A           | N/A                                                                | AK055830  | 1.321 | 1.183 |       |       |       | 1.333 | 0.718                                                                                                   |
| KIAA0087      | N/A                                                                | D42038    | 1.226 | 0.7   |       |       |       | 1.428 | 0.728                                                                                                   |
| NETO1         | neuroligin- and tolloid-like protein 1 isoform 3 precursor         | NM_138966 |       |       | 1.051 | 0.516 |       | 1.602 | 0.877                                                                                                   |
| N/A           | N/A                                                                | AK091901  | 1.256 | 0.529 |       |       |       | 1.397 | 0.354                                                                                                   |
| ARGBP2        | Arg/Abi-interacting protein 2 isoform 2                            | NM_021069 | 1.605 | 0.394 |       |       |       | 1.047 | 0.507                                                                                                   |
| FLJ38377      | hypothetical protein FLJ38377                                      | NM_152698 | 1.158 | 0.643 |       |       |       | 1.491 | 0.701                                                                                                   |
| N/A           | N/A                                                                | AK125274  | 1.127 | 0.384 |       |       |       | 1.521 | 0.799                                                                                                   |
| CSHL1         | chorionic somatomammotropin hormone-like 1 isoform 1 precursor     | NM_022579 | 1.098 | 0.424 |       |       |       | 1.549 | 0.4                                                                                                     |
| N/A           | Unknown (protein for IMAGE:4610447)                                | BC022390  | 1.029 | 0.438 |       |       |       | 1.615 | 0.537                                                                                                   |
| N/A           | N/A                                                                | AK095266  | 2.644 | 0.915 |       |       |       |       | Protein amino acid phosphorylation. Signal transduction. Alcohol metabolism. Lipid metabolism.          |
| N/A           | PPRR6495                                                           | AY358177  | 1.02  | 0.957 |       |       |       | 1.622 | 0.43                                                                                                    |
| SPTBN2        | * spectrin, beta, non-erythrocytic 2"                              | NM_006946 | 1.075 | 0.528 |       |       |       | 1.561 | 0.439                                                                                                   |
| RNF28         | ring finger protein 28                                             | AJ291713  | 1.016 | 0.656 |       |       |       | 1.617 | 0.445                                                                                                   |
| N/A           | N/A                                                                | AK128846  |       |       | 1.015 | 0.506 |       | 1.618 | 0.351                                                                                                   |
| GPR83         | G protein-coupled receptor 83                                      | NM_016540 | 1.309 | 0.713 |       |       |       | 1.324 | 0.806                                                                                                   |
| C20orf160     | chromosome 20 open reading frame 160                               | NM_080625 | 1.189 | 0.587 |       |       |       | 1.444 | 0.525                                                                                                   |
| SRY           | sex determining region Y                                           | NM_003140 | 2.631 | 1.237 |       |       |       |       | Transcription. Regulation of transcription, DNA-dependent. Sex differentiation. Male sex determination. |
| NELL1         | nel-like 1 precursor                                               | NM_006157 |       |       | 1.105 | 0.389 |       | 1.525 | 0.665                                                                                                   |
| N/A           | Similar to prostaglandin E receptor 4 (subtype EP4)                | BC042539  | 1.462 | 0.226 |       |       |       | 1.167 | 0.274                                                                                                   |
| LYZL6         | LYZL6 protein                                                      | BC054481  | 1.048 | 0.53  |       |       |       | 1.581 | 0.394                                                                                                   |
| N/A           | N/A                                                                | AK055759  | 2.077 | 2.259 |       |       |       | 1.214 | 0.482                                                                                                   |
| KRT20         | keratin 20                                                         | NM_019010 | 1.472 | 1.128 |       |       |       | 1.153 | 0.606                                                                                                   |
| SLC7A8        | * solute carrier family 7 (cationic amino acid transporter, y+ sy) | NM_012244 | 2.624 | 1.41  |       |       |       |       | Protein complex assembly. Amino acid metabolism. Amino acid transport.                                  |
| LILRB2        | LILRB2 protein                                                     | BC041708  | 1.192 | 0.874 |       |       |       | 1.432 | 0.474                                                                                                   |
| CXCL16        | chemokine (C-X-C motif) ligand 16                                  | NM_022059 | 1.396 | 0.46  |       |       |       | 1.228 | 0.91                                                                                                    |
| N/A           | N/A                                                                | AK124840  | 1.139 | 0.692 |       |       |       | 1.483 | 0.687                                                                                                   |
| DKFZp451F1716 | hypothetical protein cDNA DKFZp451F1716 (from clone DKFZ AL832580) | NM_006762 | 1.274 | 0.638 |       |       |       | 1.347 | 0.902                                                                                                   |
| LAPTM5        | Lysosomal-associated multipspanning membrane protein-5             | NM_006762 | 1.373 | 0.38  |       |       |       | 1.246 | 0.614                                                                                                   |
| FLJ33718      | hypothetical protein FLJ33718                                      | NM_173660 |       |       | 1.175 | 0.48  |       | 1.444 | 0.716                                                                                                   |
| FGF23         | fibroblast growth factor 23 precursor                              | NM_020638 |       |       | 1.127 | 0.812 |       | 1.491 | 0.562                                                                                                   |
| UCN3          | urocortin 3                                                        | NM_053049 | 1.258 | 0.678 |       |       |       | 1.359 | 0.762                                                                                                   |
| N/A           | N/A                                                                | AK124561  | 1.013 | 0.459 |       |       |       | 1.603 | 0.508                                                                                                   |
| MGC15619      | hypothetical protein MGC15619                                      | NM_032369 | 1.321 | 0.755 |       |       |       | 1.294 | 0.766                                                                                                   |
| CGM1b         | CD66d                                                              | D90278    | 1.226 | 0.57  |       |       |       | 1.388 | 0.615                                                                                                   |
| AZGP1         | * alpha-2-glycoprotein 1, zinc"                                    | NM_001185 | 1.199 | 0.619 |       |       |       | 1.415 | 0.455                                                                                                   |
| RAB3C         | * RAB3C, member RAS oncogene family"                               | NM_138453 | 2.613 | 1.377 |       |       |       |       | Cation transport.                                                                                       |
| DOC2B         | * double C2-like domains, beta"                                    | NM_003585 | 1.078 | 0.97  |       |       |       | 1.535 | 0.582                                                                                                   |
| SLC18A3       | solute carrier family 18 (vesicular acetylcholine), member 3"      | NM_003055 |       |       | 1.176 | 0.549 |       | 1.435 | 0.776                                                                                                   |
| N/A           | golgi autoantigen golgin subfamily a2-like                         | AF332229  | 1.396 | 0.354 |       |       |       | 1.215 | 0.583                                                                                                   |
| IFNA10        | * interferon, alpha 10"                                            | NM_002171 | 1.603 | 0.592 |       |       |       | 1.008 | 0.489                                                                                                   |
| C1orf32       | chromosome 1 open reading frame 32                                 | NM_199351 | 1.557 | 1.016 |       |       |       | 1.054 | 0.832                                                                                                   |
| FBXL16        | F-box and leucine-rich repeat protein 16                           | NM_153350 |       |       | 1.121 | 0.607 |       | 1.489 | 0.705                                                                                                   |
| DRD1IP        | dopamine receptor D1 interacting protein                           | NM_015722 |       |       | 1.365 | 0.371 |       | 1.242 | 0.199                                                                                                   |
| SIAT8B        | sialyltransferase 8B                                               | NM_006011 |       |       | 1.098 | 0.769 |       | 1.506 | 0.457                                                                                                   |
| FETUB         | fetuin B                                                           | NM_014375 | 1.265 | 0.889 |       |       |       | 1.339 | 0.608                                                                                                   |
| REM1          | RAS-like GTP-binding protein REM                                   | NM_014012 |       |       | 1.091 | 0.353 |       | 1.512 | 0.72                                                                                                    |
| N/A           | N/AcDNA DKFZp564K1522 (from clone DKFZp564K1522).                  | AL050397  | 1.338 | 0.993 |       |       |       | 1.265 | 0.501                                                                                                   |
| TRIM10        | tripartite motif-containing 10 isoform 2                           | NM_052828 | 1.032 | 0.353 |       |       |       | 1.569 | 0.523                                                                                                   |
| SLC4A10       | * solute carrier family 4, sodium bicarbonate transporter-like, n  | NM_022058 | 1.017 | 0.974 |       |       |       | 1.584 | 0.7                                                                                                     |
| NXF           | HLH-PAS transcription factor NXF                                   | NM_178864 | 1.079 | 1.604 | 1.252 | 0.583 |       | 1.349 | 0.654                                                                                                   |
| TEPP          | testis/prostate/placenta-expressed protein isoform 1               | NM_199046 | 1.088 | 0.629 |       |       |       | 1.512 | 0.377                                                                                                   |

|           |                                                                         |              |       |       |       |       |       |       |       |       |                                                                                                                  |
|-----------|-------------------------------------------------------------------------|--------------|-------|-------|-------|-------|-------|-------|-------|-------|------------------------------------------------------------------------------------------------------------------|
| FCER2     | * Fc fragment of IgE, low affinity II, receptor for (CD23A)*            | NM_002002    |       |       | 1.25  | 1.012 |       |       | 1.348 | 0.497 |                                                                                                                  |
| SPTBN4    | * spectrin, beta, non-erythrocytic 4"                                   | NM_025213    |       |       | 1.399 | 0.737 |       |       | 1.198 | 0.682 | Cytoskeletal anchoring. Vesicle-mediated transport.                                                              |
| PCDH17    | protocadherin 17                                                        | NM_014459    |       |       | 1.321 | 0.905 |       |       | 1.276 | 0.536 | Cell adhesion. Homophilic cell adhesion.                                                                         |
| EYA2      | eyes absent 2 isoform b                                                 | NM_172113    |       |       | 1.107 | 0.591 |       |       | 1.489 | 0.653 | Eye morphogenesis. Regulation of transcription, DNA-dependent. Development.                                      |
| L3MBTL4   | l(3)mbt-like 4                                                          | NM_173464    |       |       | 1.106 | 0.623 |       |       | 1.489 | 0.815 | Protein amino acid phosphorylation. Signal transduction. Alcohol metabolism. Lipid metabolism.                   |
| MPO       | myeloperoxidase                                                         | NM_000250    |       |       | 1.39  | 0.795 |       |       | 1.205 | 0.494 | Anti-apoptosis. Defense response. Response to oxidative stress.                                                  |
| FLJ16139  | FLJ16139 protein                                                        | NM_001004329 |       |       | 1.067 | 0.675 |       |       | 1.528 | 0.582 |                                                                                                                  |
| N/A       | ADAM 21                                                                 | AF029900     |       |       | 1.392 | 0.85  |       |       | 1.2   | 0.537 | Proteolysis and peptidolysis. Fertilization.                                                                     |
| KIAA1643  | KIAA1643 protein                                                        | AB046863     |       |       | 1.521 | 0.876 |       |       | 1.071 | 0.685 |                                                                                                                  |
| DOCK3     | dedicator of cytokinesis 3                                              | NM_004947    |       |       | 1.043 | 0.754 |       |       | 1.548 | 1.038 |                                                                                                                  |
| ADAM5     | ADAM5 protein                                                           | BC067864     |       |       | 1.586 | 1.042 |       |       | 1.005 | 0.298 |                                                                                                                  |
| CBX4      | chromobox homolog 4                                                     | NM_003655    |       |       | 1.345 | 0.569 | 1.245 | 1.005 |       |       | Chromatin assembly or disassembly. Transcription. Regulation of transcription, DNA-dependent. Anti-apoptosis.    |
| EFNB3     | ephrin-B3 precursor                                                     | NM_001406    |       |       | 1.416 | 0.593 |       |       | 1.172 | 0.446 | Cell-cell signaling. Neurogenesis. Cell differentiation.                                                         |
| NDP       | Norrie disease protein                                                  | NM_000266    |       |       | 2.987 | 0.702 |       |       |       |       | Vacuole organization and biogenesis. Signal transduction. Cell-cell signaling. Neurogenesis. Sensory perception. |
| UMP-CMPK  | UMP-CMP kinase                                                          | NM_016308    |       |       | 1.431 | 0.887 | 1.156 | 0.615 |       |       | Nucleobase, nucleoside, nucleotide and nucleic acid metabolism. Pyrimidine ribonucleotide biosynthesis.          |
| IL29      | interleukin 29                                                          | NM_172140    |       |       | 1.32  | 0.44  |       |       | 1.267 | 0.514 |                                                                                                                  |
| GABRD     | * gamma-aminobutyric acid (GABA) A receptor, delta"                     | NM_000815    |       |       | 1.117 | 1.01  |       |       | 1.47  | 0.654 | Ion transport. Signal transduction. Synaptic transmission.                                                       |
| CPLEX1    | complexin 1                                                             | NM_006651    |       |       | 1.145 | 0.632 | 1.442 | 0.504 |       |       | Neurotransmitter transport. Exocytosis. Synaptic transmission.                                                   |
| N/A       | N/A                                                                     | AK126221     |       |       | 1.52  | 0.6   | 1.066 | 0.391 |       |       |                                                                                                                  |
| SAA2      | serum amyloid A2                                                        | NM_030754    |       |       | 1.152 | 1.485 |       |       | 1.431 | 0.475 | Acute-phase response. Acute-phase response. Positive regulation of cytosolic calcium ion concentration.          |
| SLC24A3   | solute carrier family 24 (sodium/potassium/calcium exchanger) NM_020689 |              |       |       |       |       | 1.063 | 0.393 | 1.515 | 0.703 | Potassium ion transport. Sodium ion transport. Calcium ion transport.                                            |
| KIAA0449  | KIAA0449 protein                                                        | AB007918     |       |       | 1.022 | 0.564 |       |       | 1.554 | 0.647 | Microtubule-based movement.                                                                                      |
| N/A       | N/A                                                                     | AK096387     |       |       |       |       | 1.332 | 0.464 | 1.243 | 0.671 | Protein amino acid phosphorylation. Signal transduction. Alcohol metabolism. Lipid metabolism.                   |
| SLC8A3    | solute carrier family 8 member 3 isoform C precursor                    | NM_183002    |       |       | 1.54  | 0.394 | 1.034 | 0.499 |       |       |                                                                                                                  |
| IFNA14    | interferon, alpha 14"                                                   | NM_002172    |       |       |       |       | 1.36  | 0.68  | 1.213 | 0.568 | Defense response.                                                                                                |
| NGK7      | natural killer cell group 7 sequence                                    | NM_005601    |       |       |       |       |       |       | 2.573 | 0.486 |                                                                                                                  |
| N/A       | Unknown (protein for IMAGE:3543874)                                     | BC001607     | 1.087 | 0.754 |       |       | 1.208 | 0.782 | 1.364 | 0.533 |                                                                                                                  |
| KLK1      | kallikrein 1 isoform 3 preproprotein                                    | AY429508     | 1.342 | 1.308 | 1.227 | 0.374 |       |       | 1.345 | 0.365 | Proteolysis and peptidolysis.                                                                                    |
| KIAA1804  | mixed lineage kinase 4                                                  | NM_032435    | 1.227 | 1.343 | 1.12  | 0.313 | 1.452 | 1.021 |       |       | Protein amino acid phosphorylation.                                                                              |
| IL5       | interleukin 5 precursor                                                 | NM_000879    |       |       | 1.429 | 0.765 | 1.142 | 0.766 |       |       | Inflammatory response. Positive regulation of cell proliferation.                                                |
| CLECSF14  | CLECSF14 protein                                                        | BC027858     |       |       | 1.504 | 0.68  |       |       | 1.065 | 0.254 | Endocytosis. Immune response.                                                                                    |
| MRIP2     | MRIP2                                                                   | AF411132     |       |       | 1.204 | 0.446 |       |       | 1.364 | 0.407 |                                                                                                                  |
| MGC12197  | BM-011 protein                                                          | NM_016625    | 1.18  | 1.112 | 2.567 | 0.589 |       |       |       |       |                                                                                                                  |
| PPP1R16B  | protein phosphatase 1 regulatory inhibitor subunit 16B                  | NM_015568    |       |       | 1.045 | 0.346 |       |       | 1.521 | 0.815 | Signal transduction.                                                                                             |
| FLJ10847  | hypothetical protein FLJ10847                                           | NM_018242    |       |       | 1.057 | 0.538 |       |       | 1.505 | 0.569 | Multidrug transport.                                                                                             |
| Shax3     | Snf7 homologue associated with Alix 3                                   | NM_152284    |       |       | 1.505 | 0.457 |       |       | 1.053 | 0.637 |                                                                                                                  |
| N/A       | eosinophil preperoxidase (AA -127 to 575)                               | X14346       |       |       | 1.012 | 0.914 |       |       | 1.542 | 0.574 | Response to oxidative stress.                                                                                    |
| RYR1      | ryanodine receptor 1 (skeletal)                                         | NM_000540    |       |       |       |       | 1.521 | 1.292 | 1.033 | 0.418 | Regulation of cell cycle. Protein folding. Cation transport. Calcium ion transport.                              |
| N/A       | ISLR                                                                    | AY358871     | 1.363 | 0.499 |       |       |       |       | 1.19  | 0.501 | Cell adhesion.                                                                                                   |
| FLJ39739  | FLJ39739 protein                                                        | NM_207400    |       |       | 2.55  | 0.793 |       |       |       |       |                                                                                                                  |
| FGR       | Gardner-Rasheed feline sarcoma viral (v-fgr) oncogene homol             | NM_005248    |       |       | 1.532 | 1.023 |       |       | 1.017 | 0.419 | Protein amino acid phosphorylation. Intracellular signaling cascade. Response to virus.                          |
| N/A       | Unknown (protein for IMAGE:5218466)                                     | BC030533     |       |       | 1.054 | 0.574 |       |       | 1.494 | 0.497 | Immune response.                                                                                                 |
| N/A       | Unknown (protein for IMAGE:4181241)                                     | BC012202     |       |       | 1.031 | 0.701 |       |       | 1.517 | 0.661 |                                                                                                                  |
| HAS1      | hyaluronan synthase 1                                                   | BC035837     |       |       | 1.359 | 0.52  |       |       | 1.189 | 0.419 | Glycosaminoglycan biosynthesis. Substrate-bound cell migration. Cell adhesion.                                   |
| AK3       | adenylate kinase 3                                                      | NM_001005353 |       |       | 1.329 | 0.617 |       |       | 1.219 | 1.18  | Nucleobase, nucleoside, nucleotide and nucleic acid metabolism. Amino acid biosynthesis.                         |
| OR8B8     | * olfactory receptor, family 8, subfamily B, member 8"                  | NM_012378    |       |       | 1.392 | 0.688 |       |       | 1.155 | 0.621 |                                                                                                                  |
| N/A       | trace amine receptor 3                                                  | AY183469     |       |       | 1.502 | 0.98  |       |       | 1.044 | 0.559 |                                                                                                                  |
| CNTN1     | contactin 1 isoform 1 precursor                                         | NM_001843    |       |       |       |       | 1.451 | 0.713 | 1.088 | 0.622 | Cell adhesion.                                                                                                   |
| DMRTA1    | DMRT-like family A1                                                     | NM_022160    |       |       | 1.15  | 0.855 |       |       | 1.388 | 0.564 | Regulation of transcription, DNA-dependent. Sex differentiation.                                                 |
| LOC375616 | kielin-like                                                             | NM_199349    |       |       |       |       | 1.08  | 0.329 | 1.457 | 0.371 |                                                                                                                  |
| sGC       | soluble guanylyl cyclase                                                | Y15723       |       |       | 1.26  | 0.684 | 1.275 | 1.029 |       |       | CGMP biosynthesis. Nitric oxide mediated signal transduction. Circulation.                                       |
| TAF4A     | TAF4A protein                                                           | NM_182522    |       |       | 1.118 | 0.634 |       |       | 1.416 | 0.647 |                                                                                                                  |
| N/A       | N/A                                                                     | AK125454     |       |       | 1.064 | 0.671 |       |       | 1.469 | 0.412 |                                                                                                                  |
| UBE2Q     | ubiquitin-conjugating enzyme E2Q                                        | NM_017582    |       |       | 1.094 | 0.982 | 1.431 | 0.684 |       |       | Ubiquitin cycle.                                                                                                 |
| N/A       | N/A                                                                     | AK058520     |       |       | 1.101 | 0.756 |       |       | 1.424 | 0.442 |                                                                                                                  |
| FLJ37078  | hypothetical protein FLJ37078                                           | NM_153043    |       |       |       |       | 1.247 | 0.461 | 1.277 | 0.377 |                                                                                                                  |

|               |                                                                    |           |       |       |       |       |       |       |                                                                                                                                  |                                                             |
|---------------|--------------------------------------------------------------------|-----------|-------|-------|-------|-------|-------|-------|----------------------------------------------------------------------------------------------------------------------------------|-------------------------------------------------------------|
| EZ1           | likely ortholog of mouse zinc finger protein EZ1                   | NM_207336 |       |       | 1.167 | 0.571 | 1.355 | 0.665 |                                                                                                                                  |                                                             |
| GJA8          | gap junction protein, alpha 8, 50kDa (connexin 50)*                | NM_005267 |       |       | 1.103 | 0.615 | 1.416 | 1.018 | Transport. Cell communication. Visual perception.                                                                                |                                                             |
| ATP6V1B1      | * ATPase, H+ transporting, lysosomal 56/58kD, V1 subunit B         | BC063411  | 1.188 | 0.718 |       |       | 1.33  | 0.537 | Ion transport. Excretion. Perception of sound. ATP synthesis coupled proton transport.                                           |                                                             |
| adam23        | Adam23 protein                                                     | AJ005580  | 1.355 | 1.188 |       |       | 1.163 | 0.868 | Proteolysis and peptidolysis. Cell adhesion. Central nervous system development.                                                 |                                                             |
| PRKCH         | * protein kinase C, eta"                                           | NM_006255 | 1.32  | 0.53  |       |       | 1.194 | 0.495 | Protein amino acid phosphorylation. Intracellular signaling cascade.                                                             |                                                             |
| HES2          | HES2 protein                                                       | BC012091  |       |       | 1.212 | 0.771 | 1.3   | 0.423 | Protein amino acid phosphorylation. Signal transduction. Alcohol metabolism. Lipid metabolism.                                   |                                                             |
| PKD1L2        | polycystin 1-like 2 isoform a                                      | NM_052892 | 1.145 | 0.24  |       |       | 1.364 | 0.521 | Cation transport. Neuropeptide signaling pathway.                                                                                |                                                             |
| POU2AF1       | * POU domain, class 2, associating factor 1"                       | NM_006235 | 1.293 | 0.535 |       |       | 1.216 | 0.566 | Transcription. Regulation of transcription, DNA-dependent. Humoral immune response.                                              |                                                             |
| C7orf29       | chromosome 7 open reading frame 29                                 | NM_138434 | 1.454 | 0.39  |       |       | 1.055 | 0.384 |                                                                                                                                  |                                                             |
| PTHr1         | parathyroid hormone receptor 1 precursor                           | NM_000316 | 1.127 | 0.615 |       |       | 1.381 | 0.477 | Skeletal development. Signal transduction. G-protein coupled receptor protein signaling pathway.                                 |                                                             |
| HOXA7         | homeobox protein A7                                                | NM_006896 | 1.396 | 0.623 | 1.11  | 0.577 |       |       |                                                                                                                                  |                                                             |
| N/A           | N/A                                                                | AK125302  |       |       |       |       | 2.505 | 0.577 |                                                                                                                                  |                                                             |
| N/A           | Unknown (protein for MGC:34009)                                    | BC031108  | 1.319 | 0.793 |       |       | 1.185 | 0.515 |                                                                                                                                  |                                                             |
| N/A           | NGNL6975                                                           | AY358255  | 1.446 | 1.007 |       |       | 1.058 | 0.485 |                                                                                                                                  |                                                             |
| PRKG2         | * protein kinase, cGMP-dependent, type II"                         | NM_006259 | 1.471 | 0.73  | 1.032 | 0.591 |       |       | Regulation of cell cycle. Protein amino acid phosphorylation. Signal transduction.                                               |                                                             |
| FLJ11273      | hypothetical protein FLJ11273                                      | NM_018374 | 2.502 | 1.267 |       |       |       |       |                                                                                                                                  |                                                             |
| ACO           | serine protease homologue                                          | X75363    | 1.062 | 0.673 |       |       |       | 1.44  | 0.835                                                                                                                            | Proteolysis and peptidolysis. Proteolysis and peptidolysis. |
| GRIA3         | glutamate receptor 3 isoform flop precursor                        | NM_000828 |       |       | 1.032 | 1.14  | 1.469 | 0.653 | Ion transport. Potassium ion transport. Glutamate signaling pathway. Synaptic transmission.                                      |                                                             |
| KIAA1910      | KIAA1910 protein                                                   | AB067497  | 2.501 | 0.564 |       |       |       |       |                                                                                                                                  |                                                             |
| N/A           | 1C7 precursor                                                      | AF031136  | 1.475 | 0.592 |       |       | 1.024 | 0.45  | Inflammatory response. Cellular defense response.                                                                                |                                                             |
| TNNI3         | tropoin 1, cardiac"                                                | NM_000363 |       |       | 1.011 | 0.655 | 1.487 | 0.676 | Muscle development. Regulation of heart contraction rate. Negative regulation of angiogenesis.                                   |                                                             |
| ECRG4         | ECRG4 protein                                                      | BC021742  |       |       |       |       | 2.497 | 0.892 |                                                                                                                                  |                                                             |
| CLDN3         | claudin 3                                                          | NM_001306 |       |       | 1.115 | 0.381 | 1.382 | 0.467 | Calcium-independent cell-cell adhesion.                                                                                          |                                                             |
| K6IRS4        | keratin 6 irs4                                                     | NM_175053 | 1.183 | 0.451 |       |       | 1.313 | 0.773 | Ectoderm development.                                                                                                            |                                                             |
| NTN4          | netrin 4                                                           | NM_021229 | 2.493 | 0.904 |       |       |       |       |                                                                                                                                  |                                                             |
| EEF1A2        | eukaryotic translation elongation factor 1 alpha 2                 | NM_001958 | 1.074 | 0.509 |       |       | 1.418 | 0.461 | Protein biosynthesis. Translational elongation.                                                                                  |                                                             |
| C4BPB         | * complement component 4 binding protein, beta"                    | BC005378  | 1.334 | 1.012 |       |       | 1.158 | 0.535 | Immune response. Complement activation, classical pathway. Blood coagulation.                                                    |                                                             |
| KCNE2         | * potassium voltage-gated channel, Isk-related family, member      | NM_172201 | 1.26  | 0.41  |       |       | 1.23  | 0.465 | Ion transport. Potassium ion transport. Muscle contraction. Regulation of heart contraction rate.                                |                                                             |
| PLA2G2D       | * phospholipase A2, group IID"                                     | NM_012400 | 1.412 | 1.249 | 1.298 | 0.973 | 1.189 | 0.453 | Phospholipid metabolism. Inflammatory response. Lipid catabolism.                                                                |                                                             |
| DBH           | dopamine beta-hydroxylase precursor                                | NM_000787 |       |       |       |       | 2.486 | 0.559 | Synaptic transmission. Catecholamine biosynthesis.                                                                               |                                                             |
| GNG13         | guanine nucleotide binding protein (G protein), gamma 13"          | NM_016541 |       |       | 1.085 | 0.524 | 1.397 | 0.638 | Signal transduction. G-protein coupled receptor protein signaling pathway.                                                       |                                                             |
| N/A           | N/A                                                                | AK097632  | 2.481 | 0.504 |       |       |       |       |                                                                                                                                  |                                                             |
| KIAA1872      | KIAA1872 protein                                                   | AB058775  | 1.076 | 0.624 |       |       | 1.405 | 0.584 | Protein amino acid phosphorylation. Signal transduction. Alcohol metabolism. Lipid metabolism.                                   |                                                             |
| PGC           | progastricin (pepsinogen C)                                        | NM_002630 | 1.111 | 0.994 |       |       | 1.368 | 0.359 | Proteolysis and peptidolysis. Proteolysis and peptidolysis. Digestion.                                                           |                                                             |
| DKFZp686B1195 | hypothetical protein cDNA DKFZp686B1195 (from clone DKFZ: BX537594 |           | 2.479 | 0.372 |       |       |       |       |                                                                                                                                  |                                                             |
| LY6H          | lymphocyte antigen 6 complex, locus H"                             | BC028894  |       |       | 1.01  | 0.564 | 1.467 | 1.171 | Cellular defense response. Neurogenesis.                                                                                         |                                                             |
| DSCR6         | Down syndrome critical region protein 6                            | NM_018962 |       |       | 1.081 | 0.427 | 1.396 | 0.57  |                                                                                                                                  |                                                             |
| N/A           | Unknown (protein for IMAGE:3356192)                                | BC001200  |       |       | 1.33  | 0.466 | 1.146 | 0.483 |                                                                                                                                  |                                                             |
| GNA14         | guanine nucleotide binding protein (G protein), alpha 14"          | NM_004297 |       |       | 1.071 | 0.749 | 1.405 | 0.596 | Protein amino acid ADP-ribosylation. Signal transduction. G-protein coupled receptor protein signaling pathway.                  |                                                             |
| CXCL1         | chemokine (C-X-C motif) ligand 1                                   | NM_001511 | 1.426 | 0.675 |       |       | 1.047 | 0.638 | Chemotaxis. Inflammatory response. Intracellular signaling cascade. Neurogenesis.                                                |                                                             |
| N/A           | group III secreted phospholipase A2                                | AF220490  | 1.002 | 1.104 |       |       | 1.47  | 0.549 | Phospholipid metabolism. Lipid catabolism.                                                                                       |                                                             |
| TRPM3         | * transient receptor potential cation channel, subfamily M, member | NM_206946 | 1.374 | 0.392 |       |       | 1.096 | 0.527 | Cation transport. Calcium ion transport.                                                                                         |                                                             |
| N/A           | N/A                                                                | AK127208  | 1.026 | 0.209 |       |       | 1.441 | 0.397 |                                                                                                                                  |                                                             |
| LOC63928      | hepatocellular carcinoma antigen gene 520                          | NM_022097 | 1.056 | 0.905 |       |       | 1.41  | 0.705 |                                                                                                                                  |                                                             |
| CKM           | muscle creatine kinase                                             | BC007462  |       |       | 1.104 | 0.61  | 1.362 | 0.474 |                                                                                                                                  |                                                             |
| CD3D          | CD3D antigen, delta polypeptide (TIT3 complex)"                    | NM_000732 |       |       |       |       | 2.465 | 0.81  | Protein complex assembly. Cell surface receptor linked signal transduction. T-cell activation. Positive thymic T-cell selection. |                                                             |
| CASKIN1       | CASK interacting protein 1                                         | NM_020764 |       |       | 1.166 | 0.831 | 1.299 | 0.77  |                                                                                                                                  |                                                             |
| MIST          | mast cell immunoreceptor signal transducer                         | NM_052964 | 1.343 | 0.443 |       |       | 1.121 | 0.707 |                                                                                                                                  |                                                             |
| N/A           | N/A                                                                | AK128498  | 1.328 | 0.45  |       |       | 1.135 | 0.689 | Cell death.                                                                                                                      |                                                             |
| C6orf117      | chromosome 6 open reading frame 117                                | NM_138409 |       |       | 1.088 | 0.796 | 1.373 | 0.594 |                                                                                                                                  |                                                             |
| SYCP1         | synaptonemal complex protein 1                                     | NM_003176 | 1.418 | 0.543 |       |       | 1.042 | 0.293 | Cytokinesis. Cell cycle. Meiosis. Synaptonemal complex formation. Meiotic recombination.                                         |                                                             |
| C21orf69      | chromosome 21 open reading frame 69 isoform 2                      | NM_058189 | 1.145 | 0.636 |       |       | 1.31  | 0.603 |                                                                                                                                  |                                                             |
| CNTN2         | contactin 2 precursor                                              | NM_005076 | 1.005 | 0.861 |       |       | 1.447 | 0.532 | Cell adhesion.                                                                                                                   |                                                             |
| PLO           | piccolo                                                            | NM_033026 |       |       |       |       | 2.45  | 0.5   |                                                                                                                                  |                                                             |
| CACNG6        | voltage-dependent calcium channel gamma-6 subunit isoform          | NM_145814 |       |       | 1.292 | 0.493 | 1.157 | 0.478 | Ion transport. Calcium ion transport.                                                                                            |                                                             |
| MYH7          | myosin, heavy polypeptide 7, cardiac muscle, beta"                 | NM_000257 |       |       |       |       | 2.447 | 0.447 | Striated muscle contraction. Muscle development.                                                                                 |                                                             |

|           |                                                                  |              |       |       |       |       |       |       |       |       |                                                                                                          |
|-----------|------------------------------------------------------------------|--------------|-------|-------|-------|-------|-------|-------|-------|-------|----------------------------------------------------------------------------------------------------------|
| MN1       | meningioma1                                                      | NM_002430    |       |       | 1.307 | 0.81  | 1.14  | 0.799 |       |       | Cell cycle. Negative regulation of cell cycle.                                                           |
| EMILIN2   | elastin microfibril interfacer 2                                 | NM_032048    |       |       | 2.447 | 0.651 |       |       |       |       | Cell adhesion.                                                                                           |
| WRN       | Werner syndrome protein                                          | NM_000553    |       |       | 1.148 | 0.282 |       |       | 1.298 | 0.58  | DNA metabolism. Aging.                                                                                   |
| N/A       | N/A                                                              | BX161470     |       |       |       |       | 1.299 | 0.885 | 1.147 | 0.878 |                                                                                                          |
| CDCP1     | CUB domain-containing protein 1 isoform 1                        | NM_022842    |       |       | 1.288 | 1.589 |       |       |       | 1.152 |                                                                                                          |
| FKSG64    | FKSG64                                                           | AF338199     | 2.468 | 1.137 | 1.351 | 0.402 | 1.094 | 0.62  |       |       |                                                                                                          |
| N/A       | N/A                                                              | AK128819     |       |       | 1.362 | 0.901 | 1.082 | 0.742 |       |       |                                                                                                          |
| N/A       | N/A                                                              | AK074650     |       |       | 1.432 | 0.561 |       |       | 1.012 | 0.365 |                                                                                                          |
| MAP7      | microtubule-associated protein 7                                 | NM_003980    |       |       | 2.444 | 1.125 |       |       |       |       | Microtubule cytoskeleton organization and biogenesis. Establishment and/or maintenance of cell polarity. |
| FUT1      | fucosyltransferase 1                                             | NM_000148    |       |       |       |       | 1.286 | 0.601 | 1.157 | 0.617 | Carbohydrate metabolism. Protein amino acid glycosylation. L-fucose catabolism.                          |
| KRTAP10-1 | keratin associated protein 10-1                                  | NM_198691    |       |       | 1.125 | 0.504 |       |       |       | 1.317 | 0.382                                                                                                    |
| HCN2      | hyperpolarization activated cyclic nucleotide-gated potassium c  | NM_001194    |       |       |       |       | 1.13  | 0.868 |       | 1.312 | 0.524                                                                                                    |
| CCR7      | chemokine (C-C motif) receptor 7 precursor                       | NM_001838    |       |       | 1.144 | 0.396 |       |       |       | 1.297 | 0.562                                                                                                    |
| N/A       | N/A                                                              | AK025855     |       |       | 1.167 | 0.619 |       |       |       | 1.272 | 0.528                                                                                                    |
| TREML2    | triggering receptor expressed on myeloid cells-like 2            | NM_024807    |       |       |       |       | 1.231 | 0.623 |       | 1.207 | 0.551                                                                                                    |
| N/A       | Unknown (protein for MGC:87051)                                  | BC067760     |       |       | 1.283 | 0.613 |       |       |       | 1.152 | 0.644                                                                                                    |
| ZNFN1A1   | zinc finger protein, subfamily 1A, 1 (Ikaros)*                   | NM_006060    |       |       |       |       | 1.123 | 0.661 | 1.31  | 0.91  | Regulation of transcription, DNA-dependent. Mesoderm development.                                        |
| N/A       | uterine-derived 14 kDa protein                                   | AF305836     |       |       |       |       | 1.286 | 0.698 |       | 1.147 | 0.753                                                                                                    |
| KIAA1617  | KIAA1617 protein                                                 | AB046837     |       |       | 2.431 | 0.682 |       |       |       |       |                                                                                                          |
| N/A       | VLCS3029                                                         | AY358806     | 1.941 | 2.177 | 1.398 | 0.532 |       |       |       | 1.031 | 0.452                                                                                                    |
| N/A       | Unknown (protein for IMAGE:3631157)                              | BC008048     | 1.408 | 1.34  | 1.415 | 0.798 |       |       |       | 1.012 | 0.649                                                                                                    |
| TNFRSF10C | * tumor necrosis factor receptor superfamily, member 10c prec    | NM_003841    |       |       | 1.168 | 0.888 |       |       |       | 1.259 | 0.49                                                                                                     |
| MST078    | MSTP078                                                          | AF170491     | 1.186 | 1.172 | 1.066 | 0.694 |       |       |       | 1.36  | 0.537                                                                                                    |
| KIAA1727  | KIAA1727 protein                                                 | NM_033393    |       |       | 1.408 | 0.528 |       |       |       | 1.013 | 0.55                                                                                                     |
| MIXL1     | Mix-like homeobox protein 1                                      | NM_031944    |       |       |       |       | 1.127 | 0.839 | 1.291 | 1.043 | Regulation of transcription, DNA-dependent.                                                              |
| TGFA      | * transforming growth factor, alpha*                             | NM_003236    |       |       | 1.029 | 0.798 |       |       |       | 1.385 | 0.907                                                                                                    |
| N/A       | N/A                                                              | AK130550     | 1.154 | 1.273 | 1.236 | 1.026 |       |       |       | 1.176 | 0.822                                                                                                    |
| DNAJA4    | * DnaJ (Hsp40) homolog, subfamily A, member 4*                   | NM_018602    |       |       | 1.088 | 0.852 |       |       |       | 1.323 | 0.501                                                                                                    |
| N/A       | N/A                                                              | AK126788     |       |       | 1.35  | 0.661 |       |       |       | 1.06  | 0.532                                                                                                    |
| UBQLN3    | ubiquilin 3                                                      | BC036743     |       |       | 1.314 | 0.719 |       |       |       | 1.094 | 0.382                                                                                                    |
| FGF13     | fibroblast growth factor 13 isoform 1y1v                         | AF108756     |       |       | 1.108 | 0.473 | 1.299 | 0.408 |       |       |                                                                                                          |
| NPTXR     | neuronal pentraxin receptor isoform 1                            | NM_014293    |       |       | 1.203 | 0.582 |       |       |       | 1.203 | 0.704                                                                                                    |
| N/A       | CD33L1                                                           | D86358       |       |       | 1.101 | 0.646 |       |       |       | 1.305 | 0.379                                                                                                    |
| N/A       | DEFB127                                                          | AY358796     | 1.604 | 1.301 | 2.404 | 0.635 |       |       |       |       | Defense response to bacteria.                                                                            |
| AQP5      | aquaporin 5                                                      | BC032946     |       |       |       |       | 1.174 | 0.49  | 1.23  | 0.807 | Water transport. Excretion.                                                                              |
| PCDH1     | protocadherin 1 isoform 2 precursor                              | NM_032420    |       |       | 1.073 | 0.532 |       |       |       | 1.322 | 0.522                                                                                                    |
| CSMD3     | CUB and Sushi multiple domains 3 isoform 1                       | NM_198123    |       |       | 1.101 | 0.861 |       |       |       | 1.294 | 1.247                                                                                                    |
| UPK2      | uroplakin 2                                                      | NM_006760    |       |       |       |       | 1.121 | 0.696 |       | 1.272 | 0.928                                                                                                    |
| TNF       | tumor necrosis factor alpha                                      | NM_000594    |       |       |       |       |       |       |       | 2.393 | 0.469                                                                                                    |
| CCL4      | chemokine (C-C motif) ligand 4 precursor                         | NM_002984    |       |       | 1.013 | 0.589 |       |       |       | 1.376 | 0.741                                                                                                    |
| N/A       | QLGT871                                                          | AY358417     |       |       | 1.185 | 0.881 |       |       |       | 1.202 | 0.481                                                                                                    |
| XCR1      | G protein-coupled receptor 5                                     | NM_005283    |       |       | 1.253 | 0.581 |       |       |       | 1.133 | 0.293                                                                                                    |
| NR5A1     | * nuclear receptor subfamily 5, group A, member 1*               | NM_004959    |       |       | 1.307 | 0.596 |       |       |       | 1.079 | 0.441                                                                                                    |
| DIO3      | DIO3 protein                                                     | BC017717     |       |       |       |       | 1.235 | 0.847 |       | 1.151 | 0.896                                                                                                    |
| CHD5      | chromodomain helicase DNA binding protein 5                      | NM_015557    |       |       |       |       | 1.162 | 0.889 |       | 1.224 | 0.89                                                                                                     |
| PNOC      | prepronociceptin                                                 | NM_006228    |       |       |       |       |       |       |       | 2.383 | 0.702                                                                                                    |
| N/A       | N/A                                                              | AK128573     |       |       | 1.183 | 1.229 | 1.197 | 1.054 |       |       |                                                                                                          |
| SLC30A10  | * solute carrier family 30 (zinc transporter), member 10 isoform | NM_001004433 |       |       | 1.18  | 0.383 |       |       |       | 1.199 | 0.591                                                                                                    |
| CA5A      | * carbonic anhydrase VA, mitochondrial precursor*                | NM_001739    |       |       | 1.084 | 0.61  |       |       |       | 1.293 | 0.348                                                                                                    |
| APC2      | adenomatosis polyposis coli 2                                    | NM_005883    |       |       | 1.06  | 0.892 |       |       |       | 1.315 | 0.778                                                                                                    |
| AOC3      | copper containing amine oxidase 3 precursor                      | NM_003734    |       |       | 1.28  | 0.612 |       |       |       | 1.095 | 0.599                                                                                                    |
| KRT1      | keratin 1                                                        | NM_006121    |       |       | 1.135 | 0.895 |       |       |       | 1.238 | 0.421                                                                                                    |
| KCNIP1    | Kv channel interacting protein 1                                 | NM_014592    |       |       | 1.028 | 0.448 |       |       |       | 1.343 | 0.716                                                                                                    |
| N/A       | LP2209                                                           | AY203950     |       |       | 2.367 | 0.877 |       |       |       |       |                                                                                                          |
| MMP26     | matrix metalloproteinase 26 preproprotein                        | NM_021801    |       |       | 2.367 | 1.039 |       |       |       |       | Collagen catabolism.                                                                                     |
| STRBP     | spermatid perinuclear RNA-binding protein                        | NM_016387    |       |       | 1.203 | 0.969 |       |       | 1.163 | 0.966 | Regulation of transcription, DNA-dependent.                                                              |



|               |                                                                    |           |       |       |       |       |       |       |       |       |                                                                                                                                 |
|---------------|--------------------------------------------------------------------|-----------|-------|-------|-------|-------|-------|-------|-------|-------|---------------------------------------------------------------------------------------------------------------------------------|
| BEX2          | brain expressed X-linked 2                                         | NM_032621 |       |       | 1.162 | 0.495 |       |       | 1.204 | 0.783 |                                                                                                                                 |
| ZNF239        | zinc finger protein 239                                            | NM_005674 |       |       | 2.365 | 0.311 |       |       |       |       | Transcription. Regulation of transcription, DNA-dependent.                                                                      |
| N/A           | thrombopoietin                                                     | AB014683  |       |       | 1.329 | 0.591 |       |       | 1.034 | 0.394 | Development. Cell proliferation.                                                                                                |
| HAPIP         | huntingtin-associated protein interacting protein                  | NM_003947 |       |       | 1.129 | 1.084 |       |       | 1.234 | 0.546 | Protein amino acid phosphorylation. Signal transduction. Intracellular signaling cascade. Neurogenesis.                         |
| CLDN9         | claudin 9                                                          | NM_020982 |       |       | 1.069 | 0.496 |       |       | 1.294 | 0.415 | Calcium-independent cell-cell adhesion.                                                                                         |
| RAI2          | RAI2 protein                                                       | BC027937  | 1.108 | 0.854 | 1.093 | 1.078 |       |       | 1.268 | 1.196 | Embryonic development.                                                                                                          |
| N/A           | N/A                                                                | AK124722  |       |       | 1.074 | 1.039 |       |       | 1.287 | 0.841 |                                                                                                                                 |
| DNAH11        | * dynein, axonemal, heavy polypeptide 11*                          | NM_003777 |       |       | 1.189 | 0.44  |       |       | 1.171 | 0.363 | Microtubule-based movement.                                                                                                     |
| GATM          | glycine amidinotransferase (L-arginine:glycine amidinotransferase) | BC004141  |       |       | 2.36  | 0.741 |       |       |       |       | Creatine biosynthesis.                                                                                                          |
| ARHGAP6       | Rho GTPase activating protein 6 isoform 2                          | NM_001174 |       |       | 2.36  | 0.872 |       |       |       |       | Rho protein signal transduction. Actin filament polymerization.                                                                 |
| HMGCS2        | 3-hydroxy-3-methylglutaryl-Coenzyme A synthase 2 (mitochondrial)   | NM_005518 | 1.048 | 1.695 |       |       | 1.181 | 0.939 | 1.178 | 0.622 | Acetyl-CoA metabolism. Cholesterol biosynthesis.                                                                                |
| N/A           | N/A                                                                | AK095331  |       |       | 1.156 | 0.551 |       |       | 1.202 | 0.467 | Protein amino acid phosphorylation. Signal transduction. Alcohol metabolism. Lipid metabolism.                                  |
| IMP-1         | IGF-II mRNA-binding protein 1                                      | NM_006546 |       |       | 2.357 | 1.194 |       |       |       |       |                                                                                                                                 |
| CTSE          | cathepsin E isoform a preproprotein                                | NM_001910 |       |       | 1.015 | 0.507 |       |       |       | 0.47  | Proteolysis and peptidolysis. Digestion. Antigen processing, exogenous antigen via MHC class II. Cell-mediated immune response. |
| N/A           | N/A                                                                | AK056241  |       |       | 1.269 | 0.591 |       |       | 1.087 | 0.616 | Protein amino acid glycosylation.                                                                                               |
| C1orf36       | chromosome 1 open reading frame 36                                 | BC065541  |       |       |       |       |       |       | 2.356 | 0.277 |                                                                                                                                 |
| N/A           | N/A                                                                | AK000420  |       |       |       |       |       |       | 2.351 | 0.648 | Protein amino acid phosphorylation. Signal transduction. Alcohol metabolism. Lipid metabolism.                                  |
| KIAA0574      | KIAA0574 protein                                                   | AB011146  | 1.132 | 1.303 |       |       |       | 1.047 | 0.434 | 1.304 | 0.518                                                                                                                           |
| ATP6V0A4      | * ATPase, H+ transporting, lysosomal V0 subunit a isoform 4*       | NM_020632 |       |       | 1.003 | 0.522 |       |       |       | 1.347 | 0.426                                                                                                                           |
| HFE           | hemochromatosis splice variant 838-2283del                         | AF144239  |       |       | 1.068 | 1.054 |       | 1.281 | 0.492 |       | Protein complex assembly. Iron ion homeostasis. Receptor mediated endocytosis.                                                  |
| C20orf185     | antimicrobial peptide RYA3                                         | NM_182658 |       |       |       |       |       |       |       | 2.348 | 0.444                                                                                                                           |
| SCUBE3        | * signal peptide, CUB domain, EGF-like 3*                          | NM_152753 |       |       | 1.024 | 0.762 |       |       | 1.32  | 1.316 |                                                                                                                                 |
| LOC284804     | LOC284804 protein                                                  | BC065483  |       |       | 1.125 | 0.428 |       |       |       | 1.219 | 0.782                                                                                                                           |
| N/A           | AH-related protein                                                 | AF331033  |       |       | 1.018 | 1.136 | 1.325 | 0.811 |       |       | CAMP biosynthesis. Intracellular signaling cascade.                                                                             |
| N/A           | N/A                                                                | AK126237  |       |       | 1.338 | 0.77  |       |       | 1.004 | 0.584 |                                                                                                                                 |
| N/A           | ncaml                                                              | AF241539  |       |       | 2.341 | 0.255 |       |       |       |       |                                                                                                                                 |
| SLC6A3        | solute carrier family 6 (neurotransmitter transporter, dopamine)   | NM_001044 |       |       |       |       | 1.099 | 0.495 | 1.241 | 0.505 | Neurotransmitter transport.                                                                                                     |
| N/A           | N/A                                                                | AK127935  |       |       | 1.321 | 1.023 |       |       | 1.016 | 0.53  | Protein amino acid phosphorylation. Signal transduction. Alcohol metabolism. Lipid metabolism.                                  |
| N/A           | Unknown (protein for IMAGE:5260398)                                | BC068579  |       |       | 1.136 | 0.668 |       |       | 1.2   | 0.421 |                                                                                                                                 |
| MGC35212      | hypothetical protein MGC35212                                      | NM_152764 |       |       | 2.336 | 0.488 |       |       |       |       |                                                                                                                                 |
| RYD5          | ligand binding protein RYD5                                        | NM_145651 |       |       | 1.243 | 0.794 |       |       | 1.092 | 0.623 |                                                                                                                                 |
| PAX1          | paired box gene 1                                                  | NM_006192 |       |       |       |       | 1.146 | 0.333 | 1.189 | 0.553 | Skeletal development. Regulation of transcription, DNA-dependent.                                                               |
| N/A           | N/A                                                                | AK130623  |       |       | 1.004 | 0.581 |       |       | 1.331 | 0.536 |                                                                                                                                 |
| IFNA13        | * interferon, alpha 13*                                            | NM_006900 |       |       | 1.016 | 0.43  |       |       | 1.319 | 0.627 | Defense response.                                                                                                               |
| FABP1         | * fatty acid binding protein 1, liver*                             | NM_001443 |       |       | 1.285 | 0.463 |       |       | 1.05  | 0.273 | Fatty acid metabolism. Transport. Cell-cell signaling. Organogenesis.                                                           |
| HOXA3         | homeobox A3 protein isoform a                                      | NM_153631 |       |       | 2.334 | 0.696 |       |       |       |       | Regulation of transcription, DNA-dependent. Development.                                                                        |
| RYD5          | ligand binding protein RYD5                                        | NM_145651 |       |       | 1.241 | 0.554 |       |       | 1.092 | 0.623 |                                                                                                                                 |
| N/A           | N/A                                                                | AK128007  |       |       | 1.109 | 0.452 |       |       | 1.223 | 0.699 | Protein amino acid phosphorylation. Signal transduction. Alcohol metabolism. Lipid metabolism.                                  |
| ZNF541        | zinc finger protein 541                                            | NM_032255 |       |       | 1.147 | 0.556 |       |       | 1.183 | 0.58  | Regulation of transcription, DNA-dependent.                                                                                     |
| DKFZp434A1727 | hypothetical protein cDNA DKFZp434A1727 (from clone DKFZ)          | AL133657  |       |       | 1.31  | 0.683 |       |       | 1.019 | 0.408 |                                                                                                                                 |
| N/A           | N/A                                                                | AK127982  |       |       |       |       | 1.062 | 0.206 | 1.266 | 0.32  | Protein amino acid phosphorylation. Signal transduction. Alcohol metabolism. Lipid metabolism.                                  |
| N/A           | G protein-coupled receptor GPR112                                  | AY255581  |       |       | 2.326 | 1.352 |       |       |       |       |                                                                                                                                 |
| DRD1          | dopamine receptor D1                                               | NM_000794 |       |       | 1.087 | 0.615 |       |       | 1.239 | 0.453 | Signal transduction. G-protein signaling, coupled to cyclic nucleotide second messenger. Dopamine receptor.                     |
| MGC35366      | hypothetical protein MGC35366                                      | NM_152435 |       |       | 1.175 | 0.487 | 1.15  | 0.898 |       |       | Histidine catabolism to glutamate and formamide.                                                                                |
| FLJ11164      | hypothetical protein FLJ11164                                      | NM_018346 | 1.079 | 1.333 | 1.289 | 0.917 | 1.035 | 0.64  |       |       | Porphyrin biosynthesis.                                                                                                         |
| N/A           | N/A                                                                | BX161461  |       |       | 1.261 | 0.736 |       |       | 1.061 | 0.498 |                                                                                                                                 |
| BTN2A2        | * butyrophilin, subfamily 2, member A2 isoform a*                  | NM_006995 |       |       | 2.32  | 0.981 |       |       |       |       |                                                                                                                                 |
| N/A           | N/A                                                                | AK125400  |       |       |       |       |       |       | 2.318 | 0.695 |                                                                                                                                 |
| N/A           | N/A                                                                | AK126775  |       |       | 1.072 | 0.599 |       |       | 1.244 | 0.346 |                                                                                                                                 |
| N/A           | PRO2949                                                            | AF119907  |       |       | 1.05  | 0.971 |       |       | 1.264 | 0.539 | Protein amino acid phosphorylation. Signal transduction. Alcohol metabolism. Lipid metabolism.                                  |
| KIAA0362      | N/A                                                                | AB002360  |       |       |       |       |       |       | 2.314 | 0.728 | Electron transport. Intracellular signaling cascade.                                                                            |
| CHN2          | chimerin (chimaerin) 2                                             | NM_004067 | 1.201 | 1.159 |       |       | 1.16  | 0.533 | 1.154 | 0.673 | Intracellular signaling cascade.                                                                                                |
| IGFL3         | insulin growth factor-like family member 3                         | NM_207393 |       |       |       |       |       |       | 2.313 | 0.566 |                                                                                                                                 |
| SALL2         | sal-like 2                                                         | NM_005407 |       |       | 1.211 | 0.513 | 1.1   | 0.421 |       |       | Regulation of transcription, DNA-dependent.                                                                                     |
| MUSP1         | MUSP1                                                              | AF384996  |       |       |       |       |       |       | 2.311 | 0.162 |                                                                                                                                 |
| N/A           | small intestine aquaporin                                          | AF159174  |       |       | 1.02  | 0.512 |       |       | 1.29  | 0.741 |                                                                                                                                 |

|           |                                                                  |              |       |       |       |       |       |       |       |  |                                                                                                                            |
|-----------|------------------------------------------------------------------|--------------|-------|-------|-------|-------|-------|-------|-------|--|----------------------------------------------------------------------------------------------------------------------------|
| LOC388161 | LOC388161 protein                                                | BC054509     | 2.309 | 0.379 |       |       |       |       |       |  |                                                                                                                            |
| N/A       | N/A                                                              | AK126237     | 1.3   | 0.72  |       |       | 1.004 | 0.584 |       |  |                                                                                                                            |
| N/A       | Unknown (protein for MGC:20989)                                  | BC014249     | 2.303 | 0.234 |       |       |       |       |       |  | Transcription. Regulation of transcription, DNA-dependent.                                                                 |
| FLJ00415  | FLJ00415 protein                                                 | AK122590     |       |       |       |       | 2.303 | 0.292 |       |  |                                                                                                                            |
| N/A       | Unknown (protein for MGC:32654)                                  | BC030984     |       | 1.127 | 0.885 |       |       | 1.173 | 0.579 |  |                                                                                                                            |
| C20orf51  | chromosome 20 open reading frame 51                              | NM_022099    | 1.312 | 1.686 | 1.071 | 0.358 |       | 1.229 | 0.48  |  |                                                                                                                            |
| XKRX      | * X Kell blood group precursor-related, X-linked*                | NM_212559    |       | 1.272 | 0.547 |       |       | 1.026 | 0.384 |  |                                                                                                                            |
| KIAA1427  | KIAA1427 protein                                                 | AB037848     |       | 1.039 | 0.769 |       |       | 1.259 | 0.661 |  | Transport.                                                                                                                 |
| N/A       | PRO1787                                                          | AF116668     |       |       |       |       |       | 2.295 | 0.273 |  | Development.                                                                                                               |
| KIAA0475  | KIAA0475 protein                                                 | AB007944     | 1.18  | 1.133 | 1.115 | 0.773 |       |       |       |  | Protein amino acid phosphorylation. Signal transduction. Alcohol metabolism. Lipid metabolism.                             |
| CYP2B7P1  | CYP2B7P1 protein                                                 | BC041174     |       |       | 1.091 | 0.99  |       | 1.204 | 0.589 |  | Electron transport. Transport.                                                                                             |
| GJB4      | gap junction protein, beta 4*                                    | NM_153212    |       |       | 1.017 | 0.847 |       | 1.277 | 0.356 |  | Cell communication. Perception of sound.                                                                                   |
| NTF5      | neurotrophin 5 preproprotein                                     | NM_006179    |       |       | 1.072 | 0.271 |       | 1.219 | 0.439 |  |                                                                                                                            |
| TUSC5     | LOST1                                                            | NM_172367    |       | 1.123 | 0.971 |       |       | 1.168 | 0.479 |  |                                                                                                                            |
| NSBP1     | nucleosomal binding protein 1                                    | NM_030763    |       | 1.113 | 0.833 | 1.176 | 0.601 |       |       |  | Transcription. Regulation of transcription, DNA-dependent.                                                                 |
| PLA2G12B  | * phospholipase A2, group XIIB"                                  | NM_032562    |       | 1.164 | 1.281 |       |       | 1.124 | 0.598 |  | Lipid catabolism.                                                                                                          |
| N/A       | Unknown (protein for IMAGE:4821006)                              | BC034423     |       | 2.287 | 0.393 |       |       |       |       |  |                                                                                                                            |
| HS6ST3    | heparan sulfate 6-O-sulfotransferase 3                           | NM_153456    |       | 2.285 | 1.26  |       |       |       |       |  |                                                                                                                            |
| CDC42L1   | CDC42-like GTPase                                                | AF211836     |       | 1.276 | 0.98  | 1.008 | 0.582 |       |       |  | Small GTPase mediated signal transduction.                                                                                 |
| CPAMD8    | C3 and PZP-like, alpha-2-macroglobulin domain containing 8*      | NM_015692    |       |       |       | 1.034 | 0.506 | 1.248 | 0.638 |  |                                                                                                                            |
| N/A       | Unknown (protein for IMAGE:4663898)                              | BC026176     | 1.189 | 0.788 |       |       |       | 1.092 | 0.347 |  | Protein amino acid phosphorylation. Signal transduction. Alcohol metabolism. Lipid metabolism.                             |
| N/A       | N/A                                                              | AK055534     | 1.241 | 0.368 |       |       |       | 1.04  | 0.507 |  |                                                                                                                            |
| RNASE3    | * ribonuclease, RNase A family, 3 (eosinophil cationic protein)* | NM_002935    | 1.043 | 1.018 |       |       |       | 1.237 | 0.563 |  | RNA catabolism. Defense response to bacteria.                                                                              |
| FLJ25660  | hypothetical protein FLJ25660                                    | NM_152481    | 1.068 | 0.644 |       |       |       | 1.212 | 0.309 |  |                                                                                                                            |
| RDS       | retinal degeneration slow protein                                | NM_000322    |       |       |       | 1.094 | 0.34  | 1.184 | 0.3   |  | Cell adhesion. Sensory perception. Visual perception.                                                                      |
| CFTR      | * cystic fibrosis transmembrane conductance regulator, ATP-bi    | NM_000492    | 1.068 | 0.271 |       |       |       | 1.21  | 0.495 |  | Ion transport. Respiratory gaseous exchange.                                                                               |
| FGF8      | fibroblast growth factor 8 isoform F precursor                   | NM_033163    |       |       | 1.006 | 0.422 |       | 1.269 | 0.569 |  | Regulation of cell cycle. Signal transduction. Cell-cell signaling. Gastrulation. Cell proliferation. Morphogenesis.       |
| KIAA1864  | KIAA1864 protein                                                 | AB058767     |       |       | 1.015 | 0.843 |       | 1.258 | 0.178 |  |                                                                                                                            |
| KIAA0550  | KIAA0550 protein                                                 | AB011122     |       |       | 1.199 | 0.611 |       | 1.073 | 0.309 |  | Signal transduction. Neuropeptide signaling pathway.                                                                       |
| N/A       | N/A                                                              | AK075134     | 2.272 | 0.975 |       |       |       |       |       |  | Cytokinesis.                                                                                                               |
| N/A       | neuronal protein 22                                              | AF303058     | 1.26  | 1.309 | 1.011 | 0.91  |       |       |       |  | Central nervous system development. Muscle development.                                                                    |
| AVPR1A    | arginine vasopressin receptor 1A                                 | NM_000706    | 1.016 | 0.792 |       |       |       | 1.254 | 0.929 |  | Generation of precursor metabolites and energy. Signal transduction. G-protein coupled receptor protein signaling pathway. |
| Gup1      | GRINL1A complex upstream protein                                 | NM_152451    | 1.035 | 0.608 |       |       |       | 1.234 | 0.969 |  |                                                                                                                            |
| naaladase | NAALADase II protein                                             | AJ012370     | 2.267 | 0.33  |       |       |       |       |       |  | Proteolysis and peptidolysis. Proteolysis and peptidolysis.                                                                |
| FRMPD1    | FERM and PDZ domain containing 1                                 | NM_014907    | 1.266 | 0.8   |       |       |       | 1.001 | 0.927 |  |                                                                                                                            |
| N/A       | N/A                                                              | BC027961     | 1.018 | 0.446 |       |       |       | 1.248 | 0.97  |  |                                                                                                                            |
| N/A       | N/A                                                              | AK126788     | 1.206 | 0.385 |       |       |       | 1.06  | 0.532 |  |                                                                                                                            |
| N/A       | ppar1                                                            | AF242527     | 2.265 | 0.457 |       |       |       |       |       |  |                                                                                                                            |
| PSMA1     | proteasome alpha 1 subunit isoform 1                             | NM_148976    | 1.187 | 0.565 | 1.077 | 0.542 |       |       |       |  | Ubiquitin-dependent protein catabolism.                                                                                    |
| TCBA1     | T-cell lymphoma breakpoint-associated target 1                   | NM_153355    |       |       | 1.231 | 0.513 |       | 1.03  | 0.617 |  |                                                                                                                            |
| N/A       | unknown                                                          | AF451986     |       |       |       |       |       | 2.261 | 0.405 |  |                                                                                                                            |
| HLA-B     | * major histocompatibility complex, class I, B"                  | NM_005514    | 2.261 | 1.228 |       |       |       |       |       |  | Antigen presentation, endogenous antigen. Antigen processing, endogenous antigen via MHC class I.                          |
| RET       | ret proto-oncogene isoform a                                     | NM_020975    |       |       | 1.053 | 0.498 |       | 1.206 | 0.867 |  | Protein amino acid phosphorylation. Protein amino acid phosphorylation. Homophilic cell adhesion. Signal transduction.     |
| FLJ45686  | FLJ45686 protein                                                 | NM_001005210 |       |       |       |       |       | 2.258 | 0.503 |  |                                                                                                                            |
| FLJ26056  | hypothetical protein LOC375127                                   | NM_201401    | 1.066 | 0.585 |       |       |       | 1.192 | 0.273 |  |                                                                                                                            |
| PKIB      | cAMP-dependent protein kinase inhibitor beta                     | NM_181795    | 2.257 | 1.201 |       |       |       |       |       |  | Negative regulation of protein kinase activity.                                                                            |
| C20orf102 | chromosome 20 open reading frame 102                             | NM_080607    | 1.025 | 0.724 |       |       |       | 1.232 | 1.052 |  |                                                                                                                            |
| N/A       | N/A                                                              | AK124203     | 1.233 | 1.248 | 1.022 | 0.813 |       |       |       |  |                                                                                                                            |
| h461      | ribonuclease-like protein 9                                      | NM_001001673 |       | 1.233 | 0.548 |       |       | 1.019 | 0.462 |  |                                                                                                                            |
| GPX7      | glutathione peroxidase 7                                         | NM_015696    | 1.213 | 0.557 |       |       |       | 1.039 | 0.758 |  | Response to oxidative stress.                                                                                              |
| CIDEA     | cell death-inducing DFFA-like effector a isoform 2               | NM_198289    | 1.154 | 0.597 |       |       |       | 1.096 | 0.644 |  | DNA fragmentation during apoptosis. Apoptosis. DNA damage response.                                                        |
| HFE2      | hemjuvelin isoform a                                             | NM_213653    | 2.249 | 0.493 |       |       |       |       |       |  |                                                                                                                            |
| N/A       | N/A                                                              | AK127971     |       |       | 1.011 | 0.348 |       | 1.237 | 0.453 |  |                                                                                                                            |
| N/A       | N/A                                                              | AK098599     |       |       |       |       |       | 2.247 | 0.229 |  |                                                                                                                            |
| N/A       | N/A                                                              | AK125712     |       |       |       |       |       | 2.245 | 0.231 |  |                                                                                                                            |
| LOC255330 | LOC255330 protein                                                | BC042038     |       |       |       |       |       | 2.245 | 0.811 |  |                                                                                                                            |

|            |                                                                  |           |       |       |       |       |       |       |       |       |  |  |  |                                                                                                                             |
|------------|------------------------------------------------------------------|-----------|-------|-------|-------|-------|-------|-------|-------|-------|--|--|--|-----------------------------------------------------------------------------------------------------------------------------|
| CXorf41    | chromosome X open reading frame 41                               | NM_173494 |       |       | 2.245 | 0.565 |       |       |       |       |  |  |  |                                                                                                                             |
| GRIK5      | glutamate receptor KA2 precursor                                 | NM_002088 |       |       |       |       |       | 2.243 | 0.803 |       |  |  |  | Potassium ion transport. Synaptic transmission.                                                                             |
| CTSH       | cathepsin H isoform A preproprotein                              | NM_004390 | 1.037 | 1.182 | 1.011 | 0.475 |       | 1.23  | 0.85  |       |  |  |  | Proteolysis and peptidolysis. Proteolysis and peptidolysis.                                                                 |
| ST14       | matrilysin                                                       | NM_021978 |       |       |       |       |       | 2.24  | 0.884 |       |  |  |  | Proteolysis and peptidolysis.                                                                                               |
| N/A        | N/A                                                              | AK096998  | 1.865 | 1.277 |       |       | 1.197 | 0.207 | 1.043 | 0.866 |  |  |  |                                                                                                                             |
| GPR54      | hypogonadotropin-1                                               | AY253982  |       |       |       |       | 1.175 | 0.465 | 1.065 | 0.395 |  |  |  | Signal transduction. G-protein coupled receptor protein signaling pathway.                                                  |
| SSTR4      | somatostatin receptor 4                                          | NM_001052 |       |       |       |       | 1.048 | 0.59  | 1.191 | 0.534 |  |  |  | Signal transduction. Neuropeptide signaling pathway. Negative regulation of cell proliferation.                             |
| PIPOX      | PIPOX protein                                                    | BC008960  |       |       | 1.15  | 0.503 |       |       | 1.087 | 0.405 |  |  |  | Protein amino acid phosphorylation. Signal transduction. Alcohol metabolism. Lipid metabolism.                              |
| GPR92      | putative G protein-coupled receptor 92                           | NM_020400 |       |       | 1.139 | 0.986 |       |       | 1.093 | 0.276 |  |  |  | Signal transduction. G-protein coupled receptor protein signaling pathway.                                                  |
| SCML2      | sex comb on midleg-like 2                                        | BC064617  |       |       | 2.231 | 1.043 |       |       |       |       |  |  |  | Regulation of transcription, DNA-dependent. Morphogenesis.                                                                  |
| SLC4A1     | solute carrier family 4, anion exchanger, member 1 (erythrocyte) | NM_000342 |       |       |       |       |       |       | 2.229 | 0.551 |  |  |  | Anion transport. Cell ion homeostasis.                                                                                      |
| HDC        | histidine decarboxylase                                          | NM_002112 |       |       | 1.035 | 0.305 |       |       | 1.192 | 0.891 |  |  |  | Amino acid metabolism. Histidine metabolism. Catecholamine biosynthesis.                                                    |
| KIAA1215   | KIAA1215 protein                                                 | AB033041  |       |       | 1.1   | 0.487 |       |       | 1.126 | 0.856 |  |  |  | Development.                                                                                                                |
| ZNF396     | zinc finger protein 396                                          | NM_145756 |       |       | 2.224 | 0.863 |       |       |       |       |  |  |  |                                                                                                                             |
| MRIP2      | MRIP2                                                            | AF411132  |       |       | 1.204 | 0.446 |       |       | 1.019 | 0.449 |  |  |  |                                                                                                                             |
| CTTNBP2    | cortactin binding protein 2                                      | NM_033427 |       |       | 2.221 | 1.049 |       |       |       |       |  |  |  |                                                                                                                             |
| CCHL1A1    | calcium channel alpha-1D subunit                                 | M76558    |       |       | 1.218 | 0.512 |       |       | 1.003 | 0.544 |  |  |  | Cation transport. Calcium ion transport.                                                                                    |
| CYP2J2     | * cytochrome P450, family 2, subfamily J, polypeptide 2*         | BC032594  |       |       | 1.083 | 0.808 |       |       | 1.131 | 0.338 |  |  |  | Electron transport. Icosanoid metabolism. Transport. Regulation of heart contraction rate.                                  |
| CLECSF7    | C-type lectin, superfamily member 7 isoform 1*                   | NM_130441 |       |       |       |       | 1.029 | 0.245 | 1.185 | 0.275 |  |  |  |                                                                                                                             |
| BMP8B      | bone morphogenetic protein 8B preproprotein                      | NM_001720 |       |       | 1.093 | 0.457 |       |       | 1.119 | 0.481 |  |  |  | Skeletal development. Cell differentiation. Growth.                                                                         |
| DHX32      | DEAD/H (Asp-Glu-Ala-Asp/His) box polypeptide 32                  | NM_018180 |       |       | 1.19  | 0.732 | 1.021 | 0.535 |       |       |  |  |  |                                                                                                                             |
| CD209      | CD209 antigen                                                    | NM_021155 |       |       | 1.145 | 0.807 |       |       | 1.062 | 0.298 |  |  |  | Endocytosis. Cell adhesion. Leukocyte cell adhesion. Intracellular signaling cascade. Pathogenesis.                         |
| SYK        | spleen tyrosine kinase                                           | NM_003177 |       |       | 1.012 | 0.556 |       |       | 1.194 | 0.695 |  |  |  | Protein complex assembly. Protein amino acid phosphorylation. Leukocyte cell adhesion. Integrin-mediated signaling pathway. |
| N/A        | N/A                                                              | AK057899  |       |       |       |       |       |       | 2.206 | 0.382 |  |  |  | Electron transport. Intracellular signaling cascade.                                                                        |
| LAMA3      | laminin alpha 3 subunit isoform 1                                | NM_198129 |       |       | 2.206 | 1.075 |       |       |       |       |  |  |  | Epidermis development. Regulation of cell adhesion. Regulation of cell migration. Regulation of embryonic development.      |
| N/A        | N/A                                                              | AK122979  |       |       | 1.013 | 1.316 | 1.192 | 0.825 |       |       |  |  |  | Protein amino acid phosphorylation. Signal transduction. Alcohol metabolism. Lipid metabolism.                              |
| IL28A      | interleukin 28A                                                  | NM_172138 |       |       |       |       |       |       | 2.203 | 0.288 |  |  |  |                                                                                                                             |
| S100A9     | S100 calcium-binding protein A9                                  | NM_002965 |       |       |       |       |       |       | 2.199 | 0.83  |  |  |  | Inflammatory response. Cell-cell signaling.                                                                                 |
| NPTX1      | neuronal pentraxin I precursor                                   | NM_002522 |       |       | 1.068 | 0.689 | 1.13  | 0.656 |       |       |  |  |  | Transport. Synaptic transmission. Central nervous system development.                                                       |
| PCTK3      | PCTK3 protein                                                    | BC040529  |       |       | 1.011 | 0.625 |       |       | 1.183 | 0.39  |  |  |  | Protein amino acid phosphorylation. Protein amino acid phosphorylation. Signal transduction.                                |
| CDH23      | cadherin related 23 isoform 1 precursor                          | NM_022124 |       |       | 1.143 | 0.477 |       |       | 1.051 | 0.499 |  |  |  | Cell adhesion. Homophilic cell adhesion. Sensory perception. Visual perception. Perception of sound.                        |
| AATF       | apoptosis antagonizing transcription factor                      | NM_012138 |       |       | 2.194 | 0.972 |       |       |       |       |  |  |  | Anti-apoptosis.                                                                                                             |
| N/A        | N/A                                                              | AK130044  |       |       | 1.018 | 0.683 |       |       | 1.174 | 0.963 |  |  |  | Protein amino acid phosphorylation. Signal transduction. Alcohol metabolism. Lipid metabolism.                              |
| C21orf129  | chromosome 21 open reading frame 129                             | NM_152506 |       |       |       |       |       |       | 2.192 | 0.654 |  |  |  |                                                                                                                             |
| DGAT2      | diacylglycerol O-acyltransferase homolog 2                       | NM_032564 |       |       | 1.151 | 0.783 |       |       | 1.039 | 0.607 |  |  |  | Triacylglycerol biosynthesis.                                                                                               |
| GRIN1      | NMDA receptor 1 isoform NR1-3 precursor                          | NM_007327 |       |       |       |       |       |       | 2.189 | 0.424 |  |  |  | Cation transport. Potassium ion transport. Calcium ion homeostasis.                                                         |
| FLJ00287   | FLJ00287 protein                                                 | AK090403  |       |       | 1.065 | 0.68  |       |       | 1.124 | 0.497 |  |  |  |                                                                                                                             |
| N/A        | N/A                                                              | AK126077  |       |       | 1.032 | 0.454 |       |       | 1.156 | 0.61  |  |  |  |                                                                                                                             |
| KRTAP10-12 | keratin associated protein 10-12                                 | NM_198699 |       |       |       |       |       |       | 2.187 | 0.705 |  |  |  |                                                                                                                             |
| N/A        | N/A                                                              | AK125932  |       |       | 1.041 | 0.521 |       |       | 1.145 | 0.396 |  |  |  |                                                                                                                             |
| SLC12A8    | solute carrier family 12, member 8*                              | NM_024628 |       |       |       |       | 1.157 | 0.738 | 1.028 | 0.658 |  |  |  | Transport. Amino acid transport.                                                                                            |
| HPX-153    | N/A                                                              | X76978    |       |       | 1.164 | 0.267 | 1.021 | 0.411 |       |       |  |  |  |                                                                                                                             |
| NTSR2      | neurotensin receptor 2                                           | NM_012344 | 2.518 | 1.415 | 1.085 | 0.452 |       |       | 1.097 | 0.477 |  |  |  | G-protein coupled receptor protein signaling pathway. Sensory perception.                                                   |
| TAS1R2     | * taste receptor, type 1, member 2*                              | NM_152232 |       |       | 1.023 | 0.734 |       |       | 1.158 | 0.456 |  |  |  |                                                                                                                             |
| LEP        | leptin precursor                                                 | NM_000230 |       |       | 1.007 | 0.937 |       |       | 1.173 | 0.569 |  |  |  | Energy reserve metabolism. Signal transduction. Cell-cell signaling.                                                        |
| N/A        | unknown                                                          | AF289604  |       |       | 1.148 | 0.531 | 1.031 | 1.213 |       |       |  |  |  |                                                                                                                             |
| HSPA12B    | heat shock 70kD protein 12B                                      | NM_052970 |       |       | 1.091 | 0.367 |       |       | 1.086 | 0.319 |  |  |  |                                                                                                                             |
| KIAA1754L  | KIAA1754-like                                                    | NM_178495 |       |       | 1.166 | 0.743 | 1.01  | 0.657 |       |       |  |  |  |                                                                                                                             |
| KIAA0984   | KIAA0984 protein                                                 | AB023201  |       |       | 1.114 | 0.579 |       |       | 1.06  | 0.81  |  |  |  |                                                                                                                             |
| GPR55      | G protein-coupled receptor 55                                    | NM_005683 | 1.416 | 1.822 | 1.084 | 0.745 |       |       | 1.089 | 0.208 |  |  |  |                                                                                                                             |
| FLJ14213   | hypothetical protein FLJ14213                                    | NM_024841 |       |       | 2.171 | 0.523 |       |       |       |       |  |  |  |                                                                                                                             |
| RGS14      | regulator of G-protein signalling 14                             | NM_006480 | 1.046 | 0.742 | 1.121 | 0.257 |       |       | 1.049 | 0.579 |  |  |  | Signal transduction. Regulation of G-protein coupled receptor protein signaling pathway.                                    |
| KIAA0681   | KIAA0681 protein                                                 | AB014581  |       |       | 1.047 | 0.764 |       |       | 1.12  | 0.68  |  |  |  | Regulation of transcription, DNA-dependent. Chromatin modification.                                                         |
| FA2H       | fatty acid 2-hydroxylase                                         | NM_024306 |       |       | 1.074 | 0.408 |       |       | 1.092 | 0.59  |  |  |  | Electron transport. Transport. Metabolism.                                                                                  |
| LOC146853  | LOC146853                                                        | NM_145272 |       |       |       |       | 1.012 | 0.787 | 1.153 | 0.604 |  |  |  |                                                                                                                             |
| GPHB5      | glycoprotein beta 5                                              | NM_145171 |       |       | 1.127 | 0.523 |       |       | 1.036 | 0.445 |  |  |  |                                                                                                                             |

|               |                                                                   |              |       |       |       |       |       |       |                                                                                                                               |
|---------------|-------------------------------------------------------------------|--------------|-------|-------|-------|-------|-------|-------|-------------------------------------------------------------------------------------------------------------------------------|
| DAAM1         | dishevelled-associated activator of morphogenesis 1               | NM_014992    | 2.163 | 1.399 |       |       |       |       | Cell organization and biogenesis. Actin cytoskeleton organization and biogenesis.                                             |
| FY            | Duffy blood group                                                 | NM_002036    |       |       |       |       | 2.162 | 0.258 | Defense response. Signal transduction. G-protein coupled receptor protein signaling pathway.                                  |
| N/A           | collagen type XIV                                                 | Y11709       | 1.117 | 1.133 |       |       | 1.042 | 0.853 |                                                                                                                               |
| N/A           | N/A                                                               | AK127725     | 1.131 | 0.529 |       |       | 1.027 | 0.491 |                                                                                                                               |
| N/A           | N/A                                                               | AK074886     | 1.047 | 0.27  |       |       | 1.108 | 0.651 |                                                                                                                               |
| KIAA0515      | KIAA0515 protein                                                  | BC002969     | 1.131 | 1.003 | 1.022 | 0.976 |       |       |                                                                                                                               |
| N/A           | silencer element                                                  | D50375       |       |       |       |       | 2.152 | 0.814 | Intracellular signaling cascade. Neuron cell differentiation.                                                                 |
| MGC27121      | MGC27121 protein                                                  | NM_001001343 |       |       | 1.116 | 0.522 | 1.034 | 0.461 |                                                                                                                               |
| FOXD2         | forkhead box D2                                                   | NM_004474    | 2.15  | 0.982 |       |       |       |       | Transcription. Regulation of transcription, DNA-dependent.                                                                    |
| PUS3          | pseudouridylate synthase 3                                        | NM_031307    | 1.056 | 0.466 | 1.093 | 0.756 |       |       | tRNA processing.                                                                                                              |
| LOC348840     | hypothetical protein LOC348840                                    | NM_182631    | 1.006 | 0.544 |       |       | 1.143 | 0.556 |                                                                                                                               |
| AHSG          | alpha-2-HS-glycoprotein                                           | BC048198     |       |       |       |       | 2.148 | 0.457 | Regulation of transcription, DNA-dependent.                                                                                   |
| SIGLEC5       | sialic acid binding Ig-like lectin 5                              | NM_003830    | 1.111 | 0.694 |       |       | 1.037 | 0.489 | Cell adhesion.                                                                                                                |
| N/A           | N/A                                                               | AK095925     |       |       | 1.015 | 0.737 | 1.132 | 0.553 | Protein amino acid phosphorylation. Signal transduction. Alcohol metabolism. Lipid metabolism.                                |
| INSM2         | insulinoma-associated protein 1A-6                                | NM_032594    | 2.146 | 0.991 |       |       |       |       |                                                                                                                               |
| N/A           | N/A                                                               | AK127489     |       |       |       |       | 2.145 | 0.472 |                                                                                                                               |
| CALCB         | calcitonin-related polypeptide, beta"                             | NM_000728    |       |       |       |       | 2.145 | 0.625 | Skeletal development. G-protein signaling, coupled to cAMP nucleotide second messenger. Adenylate cyclase activation.         |
| MGC34728      | hypothetical protein MGC34728                                     | NM_152533    | 1.109 | 1.095 | 1.083 | 0.693 | 1.061 | 0.352 |                                                                                                                               |
| MT4           | metallothionein IV                                                | NM_032935    |       |       | 1.052 | 0.649 | 1.09  | 0.433 |                                                                                                                               |
| VIL1          | villin 1                                                          | NM_007127    |       |       |       |       | 2.14  | 0.724 | Protein complex assembly. Cytoskeleton organization and biogenesis. Actin filament severing. Actin filament bundle formation. |
| TGM3          | transglutaminase 3 precursor                                      | NM_003245    | 1.04  | 0.907 |       |       | 1.1   | 0.643 | Peptide cross-linking.                                                                                                        |
| SPINT1        | serine protease inhibitor Kunitz type 1                           | AY372172     | 1.002 | 0.675 |       |       | 1.137 | 0.716 |                                                                                                                               |
| FLJ10901      | hypothetical protein FLJ10901                                     | NM_018265    | 1.034 | 0.631 | 1.1   | 0.547 |       |       |                                                                                                                               |
| N/A           | N/A                                                               | AK130578     | 1.003 | 0.83  |       |       | 1.127 | 0.541 |                                                                                                                               |
| FAM26C        | family with sequence similarity 26, member C"                     | NM_001001412 |       |       |       |       | 2.129 | 0.203 |                                                                                                                               |
| N/A           | N/A                                                               | AK127288     | 1.04  | 0.211 |       |       | 1.087 | 0.413 | Inflammatory response.                                                                                                        |
| MYH13         | " myosin, heavy polypeptide 13, skeletal muscle"                  | NM_003802    | 2.12  | 1.451 |       |       |       |       | Striated muscle contraction. Muscle development.                                                                              |
| LOC89944      | hypothetical protein BC008326                                     | NM_138342    | 1.059 | 0.695 |       |       | 1.06  | 0.866 | Carbohydrate metabolism.                                                                                                      |
| NNMT          | nicotinamide N-methyltransferase                                  | BC000234     |       |       |       |       | 2.116 | 0.778 |                                                                                                                               |
| LOC205251     | hypothetical protein LOC205251                                    | NM_174925    | 2.116 | 0.487 |       |       |       |       |                                                                                                                               |
| NEF3          | neurofilament 3 (150kDa medium)                                   | NM_005382    |       |       | 1.017 | 0.176 | 1.095 | 0.379 |                                                                                                                               |
| KIAA1680      | KIAA1680 protein                                                  | AB051467     | 1.033 | 0.749 |       |       | 1.078 | 0.32  |                                                                                                                               |
| N/A           | Unknown (protein for IMAGE:3867347)                               | BC010635     |       |       |       |       | 2.108 | 0.244 | Protein amino acid phosphorylation. Signal transduction. Alcohol metabolism. Lipid metabolism.                                |
| OR1J2         | " olfactory receptor, family 1, subfamily J, member 2"            | NM_054107    | 1.101 | 0.992 |       |       | 1.004 | 0.256 |                                                                                                                               |
| GNAS          | guanine nucleotide binding protein, alpha stimulating activity pr | NM_080425    |       |       | 1.099 | 0.613 | 1.006 | 0.474 | G-protein coupled receptor protein signaling pathway.                                                                         |
| LOC284861     | hypothetical gene supported by BC039313                           | NM_201565    | 1.03  | 0.489 |       |       | 1.074 | 0.311 |                                                                                                                               |
| MARCO         | macrophage receptor with collagenous structure                    | NM_006770    | 1.018 | 0.6   |       |       | 1.083 | 0.336 | Phosphate transport. Cell surface receptor linked signal transduction. Response to pathogenic bacteria.                       |
| N/A           | N/A                                                               | AK055043     | 1.053 | 0.543 |       |       | 1.046 | 0.686 | Neurotransmitter transport. Vesicle docking during exocytosis.                                                                |
| IFNA1         | " interferon, alpha 1"                                            | NM_024013    | 1.03  | 0.365 |       |       | 1.069 | 0.278 | Defense response.                                                                                                             |
| N/A           | breast cancer suppressor element Ishmael Upper RP2                | U50403       |       |       |       |       | 2.098 | 0.421 |                                                                                                                               |
| C21orf77      | chromosome 21 open reading frame 77                               | NM_018277    | 1.046 | 0.726 |       |       | 1.045 | 0.647 |                                                                                                                               |
| A4GNT         | alpha-1,4-N-acetylgalactosaminyltransferase"                      | NM_016161    |       |       |       |       | 2.09  | 0.587 | Carbohydrate metabolism. O-linked glycosylation.                                                                              |
| DEFB104       | " defensin, beta 104"                                             | NM_080389    | 1.039 | 0.604 |       |       | 1.05  | 0.653 |                                                                                                                               |
| TFAP2A        | TFAP2A protein                                                    | BC017754     | 2.088 | 0.828 |       |       |       |       | Transcription. Regulation of transcription, DNA-dependent. Signal transduction.                                               |
| N/A           | N/A                                                               | AK090868     | 2.088 | 0.784 |       |       |       |       | Protein amino acid phosphorylation. Signal transduction. Alcohol metabolism. Lipid metabolism. Metabolism.                    |
| B2-bradykinin | N/A                                                               | X86163       | 2.087 | 0.43  |       |       |       |       | Smooth muscle contraction. Inflammatory response. Transmembrane receptor protein tyrosine kinase signaling pathway.           |
| PJCG2         | olfactory-like receptor PJCG2                                     | AF238487     | 1.012 | 0.466 |       |       | 1.073 | 0.6   |                                                                                                                               |
| JAM2          | junctional adhesion molecule 2 precursor                          | NM_021219    | 2.085 | 0.416 |       |       |       |       | Cell-cell adhesion.                                                                                                           |
| N/A           | N/A                                                               | AK127761     | 1.026 | 0.6   |       |       | 1.056 | 0.447 | Protein amino acid phosphorylation. Signal transduction. Alcohol metabolism. Lipid metabolism.                                |
| HSD11B1       | 11-beta-hydroxysteroid dehydrogenase 1                            | NM_181755    | 2.081 | 0.667 |       |       |       |       | Lipid metabolism. Metabolism. Glucocorticoid metabolism.                                                                      |
| HEMGN         | hemogen                                                           | NM_018437    | 2.079 | 0.261 |       |       |       |       |                                                                                                                               |
| PPP4R2        | protein phosphatase 4 regulatory subunit 2                        | AJ271448     | 1.056 | 1.048 | 1.021 | 0.947 |       |       | Protein modification.                                                                                                         |
| HA-1          | minor histocompatibility antigen HA-1                             | NM_012292    | 1.018 | 0.578 |       |       | 1.059 | 0.511 | Intracellular signaling cascade.                                                                                              |
| AGT           | angiotensinogen precursor                                         | NM_000029    | 2.077 | 0.487 |       |       |       |       | Cell surface receptor linked signal transduction. Cell-cell signaling. Pregnancy. Regulation of blood pressure.               |
| N/A           | vitelliform macular dystrophy 2-like protein 1                    | AF440756     |       |       |       |       | 2.076 | 0.48  | Ion transport.                                                                                                                |
| CCBP2         | chemokine binding protein 2                                       | NM_001296    | 3.1   | 1.291 | 2.075 | 0.335 |       |       | Chemotaxis. Immune response. Signal transduction. G-protein coupled receptor protein signaling pathway. Development.          |

|               |                                                                  |                                             |       |       |       |       |       |       |       |       |                                                                                                                                |
|---------------|------------------------------------------------------------------|---------------------------------------------|-------|-------|-------|-------|-------|-------|-------|-------|--------------------------------------------------------------------------------------------------------------------------------|
| DKFZp451K1917 | hypothetical protein                                             | DNA DKFZp451K1917 (from clone DKFZ AL832613 |       |       | 1.037 | 0.701 |       |       | 1.034 | 0.415 | Transport.                                                                                                                     |
| FLJ20130      | hypothetical protein                                             | FLJ20130                                    |       |       | 2.069 | 0.811 |       |       |       |       |                                                                                                                                |
| N/A           | N/A                                                              |                                             | 1.55  | 1.777 |       |       |       |       | 2.068 | 0.446 |                                                                                                                                |
| MGC42951      | MGC42951 protein                                                 |                                             |       |       |       |       |       |       | 2.068 | 0.455 |                                                                                                                                |
| FLJ90680      | FLJ90680 protein                                                 |                                             |       |       |       |       |       |       | 2.068 | 1.114 |                                                                                                                                |
| IL9           | interleukin 9 precursor                                          |                                             |       |       | 2.067 | 1.153 |       |       |       |       | Inflammatory response. Cell-cell signaling. Positive regulation of cell proliferation.                                         |
| N/A           | N/A                                                              |                                             |       |       |       |       | 2.066 | 0.183 |       |       | Protein amino acid phosphorylation. Signal transduction. Alcohol metabolism. Lipid metabolism.                                 |
| N/A           | N/A                                                              |                                             |       |       | 2.065 | 0.269 |       |       |       |       | Protein amino acid phosphorylation. Signal transduction. Alcohol metabolism. Lipid metabolism. Metabolism.                     |
| GPR41         | G protein-coupled receptor 41                                    |                                             |       |       |       |       |       |       | 2.064 | 0.232 | Signal transduction. G-protein coupled receptor protein signaling pathway.                                                     |
| FLJ00087      | FLJ00087 protein                                                 |                                             |       |       | 1.046 | 0.568 |       |       | 1.017 | 0.391 |                                                                                                                                |
| C4BPA         | * complement component 4 binding protein, alpha*                 |                                             |       |       | 1.054 | 1.021 |       |       | 1.008 | 0.532 | Immune response. Complement activation, classical pathway.                                                                     |
| N/A           | N/A                                                              |                                             |       |       |       |       |       |       | 2.061 | 0.406 |                                                                                                                                |
| FLJ12650      | hypothetical protein                                             | FLJ12650                                    |       |       |       |       |       |       | 2.059 | 0.51  |                                                                                                                                |
| N/A           | N/A                                                              |                                             |       |       |       |       |       |       | 2.056 | 0.791 | Protein amino acid phosphorylation. Signal transduction. Alcohol metabolism. Lipid metabolism.                                 |
| LOC375295     | LOC375295 protein                                                |                                             |       |       | 2.056 | 0.578 |       |       |       |       |                                                                                                                                |
| PRG3          | proteoglycan 3                                                   |                                             |       |       | 1.032 | 0.547 |       |       | 1.022 | 0.39  | Histamine biosynthesis. Negative regulation of protein biosynthesis. Leukotriene biosynthesis. Neutrophil activation.          |
| N/A           | N/A                                                              |                                             |       |       | 1.036 | 1.212 |       |       | 1.016 | 0.664 |                                                                                                                                |
| KIAA1981      | KIAA1981 protein                                                 |                                             |       |       | 2.048 | 0.368 |       |       |       |       |                                                                                                                                |
| ITGAL         | integrin alpha L precursor * alpha polypeptide) (ITGAL), mRNA    |                                             |       |       |       |       |       |       | 2.048 | 0.276 | Protein amino acid phosphorylation. Signal transduction. Alcohol metabolism. Lipid metabolism.                                 |
| FLJ00376      | FLJ00376 protein                                                 |                                             |       |       | 2.047 | 0.658 |       |       |       |       |                                                                                                                                |
| FLJ00097      | FLJ00097 protein                                                 |                                             |       |       |       |       |       |       | 2.046 | 0.648 | Protein amino acid phosphorylation. Signal transduction. Alcohol metabolism. Lipid metabolism.                                 |
| RFPL3         | ret finger protein-like 3                                        |                                             |       |       | 1.014 | 0.404 |       |       | 1.029 | 0.336 | Protein ubiquitination.                                                                                                        |
| N/A           | FP588                                                            |                                             |       |       |       |       |       |       | 2.043 | 1.064 |                                                                                                                                |
| DKFZp434P0216 | hypothetical protein                                             |                                             |       |       |       |       |       |       | 2.043 | 0.804 |                                                                                                                                |
| TDRD1         | tudor domain containing 1                                        |                                             |       |       | 2.038 | 0.277 |       |       |       |       |                                                                                                                                |
| N/A           | N/A                                                              |                                             |       |       | 2.037 | 0.728 |       |       |       |       |                                                                                                                                |
| UPK3A         | uroplakin 3A                                                     |                                             |       |       | 2.033 | 0.572 |       |       |       |       |                                                                                                                                |
| AMPD3         | adenosine monophosphate deaminase (isoform E)                    |                                             | 1.037 | 0.752 | 1.021 | 0.841 |       |       | 1.011 | 0.414 | AMP catabolism. Nucleotide metabolism. Purine ribonucleoside monophosphate biosynthesis.                                       |
| ACR           | acrosin precursor                                                |                                             |       |       |       |       |       |       | 2.032 | 0.417 | Proteolysis and peptidolysis. Acrosome reaction.                                                                               |
| N/A           | N/A                                                              |                                             |       |       | 2.03  | 0.584 |       |       |       |       |                                                                                                                                |
| IL2RG         | interleukin 2 receptor, gamma precursor*                         |                                             |       |       |       |       |       |       | 2.03  | 0.477 | Protein complex assembly. Immune response. Signal transduction. Cell proliferation.                                            |
| N/A           | hypothetical protein, similar to (NP_006139.1) LASP-1, LIM an    |                                             |       |       |       |       |       |       | 2.028 | 0.415 |                                                                                                                                |
| DKFZp686J1593 | hypothetical protein                                             |                                             |       |       |       |       | 1.026 | 0.748 | 1.002 | 0.584 | Cell surface receptor linked signal transduction. Sensory perception. Rhodopsin mediated signaling.                            |
| OR52W1        | * olfactory receptor, family 52, subfamily W, member 1*          |                                             |       |       | 1.002 | 0.849 |       |       | 1.025 | 0.588 |                                                                                                                                |
| FLJ00331      | FLJ00331 protein                                                 |                                             |       |       | 2.025 | 0.643 |       |       |       |       |                                                                                                                                |
| MMP28         | matrix metalloproteinase 28 preproprotein isoform 2              |                                             |       |       | 2.024 | 0.632 |       |       |       |       | Proteolysis and peptidolysis. Proteolysis and peptidolysis.                                                                    |
| FLJ32949      | hypothetical protein                                             | FLJ32949                                    |       |       | 2.024 | 0.813 |       |       |       |       |                                                                                                                                |
| CACNG7        | voltage-dependent calcium channel gamma-7 subunit                |                                             | 2.653 | 1.227 |       |       |       |       | 2.024 | 0.803 | Ion transport. Calcium ion transport.                                                                                          |
| FLJ39155      | hypothetical protein                                             | FLJ39155 isoform 2                          |       |       | 2.019 | 0.398 |       |       |       |       | Cell adhesion.                                                                                                                 |
| OR4D1         | * olfactory receptor, family 4, subfamily D, member 1*           |                                             |       |       | 1.016 | 0.938 |       |       | 1.002 | 0.634 |                                                                                                                                |
| LEF1          | lymphoid enhancer binding factor-1                               |                                             |       |       | 2.018 | 0.608 |       |       |       |       | Transcription. Regulation of transcription, DNA-dependent. Wnt receptor signaling pathway.                                     |
| PIK3CD        | * phosphoinositide-3-kinase, catalytic, delta polypeptide*       |                                             |       |       | 2.017 | 0.998 |       |       |       |       | Protein amino acid phosphorylation. Signal transduction. Signal transduction.                                                  |
| KIAA1313      | KIAA1313 protein                                                 |                                             |       |       |       |       |       |       | 2.016 | 0.407 | Cell adhesion. Homophilic cell adhesion.                                                                                       |
| SLC5A8        | solute carrier family 5 (iodide transporter), member 8*          |                                             |       |       |       |       |       |       | 2.012 | 0.63  | Transport.                                                                                                                     |
| N/A           | PRO2605                                                          |                                             |       |       |       |       |       |       | 2.009 | 0.651 |                                                                                                                                |
| DKFZp686O1389 | hypothetical protein                                             |                                             |       |       |       |       |       |       | 2.009 | 0.662 |                                                                                                                                |
| COLQ          | acetylcholinesterase collagen-like tail subunit isoform VI precu |                                             |       |       | 2.008 | 1.089 |       |       |       |       | Acetylcholine catabolism in synaptic cleft. Phosphate transport. Asymmetric protein localization. Neurotransmitter catabolism. |
| ALK           | anaplastic lymphoma kinase Ki-1                                  |                                             |       |       |       |       |       |       | 2.005 | 0.907 | Protein amino acid phosphorylation. Transmembrane receptor protein tyrosine kinase signaling pathway. Neurogenesis.            |
| N/A           | N/A                                                              |                                             |       |       | 2.002 | 2.219 |       |       |       |       | Central nervous system development.                                                                                            |
| GPR42         | G protein-coupled receptor 42                                    |                                             |       |       |       |       |       |       | 2.001 | 0.634 | Signal transduction. G-protein coupled receptor protein signaling pathway.                                                     |
| IL28B         | interleukin 28B                                                  |                                             |       |       |       |       |       |       | 2     | 0.331 |                                                                                                                                |
| N/A           | placenta copper monamine oxidase                                 |                                             |       |       |       |       |       |       | 1.994 | 0.544 | Inflammatory response. Cell adhesion. Amine metabolism.                                                                        |
| N/A           | N/A                                                              |                                             |       |       |       |       |       |       | 1.993 | 0.563 |                                                                                                                                |
| WAS           | Wiskott-Aldrich syndrome protein                                 |                                             |       |       |       |       |       |       | 1.992 | 1.339 | Defense response. Blood coagulation. Actin polymerization and/or depolymerization. Epidermis development.                      |
| C20orf152     | chromosome 20 open reading frame 152                             |                                             |       |       | 1.992 | 0.345 |       |       |       |       |                                                                                                                                |
| TRIM15        | tripartite motif protein 15 isoform alpha                        |                                             |       |       | 1.99  | 1.12  |       |       |       |       | Mesoderm cell fate determination. Protein ubiquitination.                                                                      |

|              |                                                                    |              |       |       |       |       |                                                                                                                      |
|--------------|--------------------------------------------------------------------|--------------|-------|-------|-------|-------|----------------------------------------------------------------------------------------------------------------------|
| PRSS1        | protease, serine, 1 preproprotein*                                 | NM_002769    |       |       | 1.987 | 0.678 | Proteolysis and peptidolysis. Proteolysis and peptidolysis. Digestion. Negative regulation of blood coagulation      |
| AKAP14       | A-kinase anchor protein 28                                         | NM_178813    | 1.987 | 0.69  |       |       |                                                                                                                      |
| ARSF         | arylsulfatase F precursor                                          | NM_004042    | 1.985 | 0.663 |       |       | Metabolism.                                                                                                          |
| MGC34923     | hypothetical protein MGC34923                                      | NM_144717    | 1.983 | 0.806 |       |       |                                                                                                                      |
| CYP2A7       | cytochrome P450, family 2, subfamily A, polypeptide 7 isoform      | NM_000764    |       |       | 1.98  | 0.475 | Electron transport.                                                                                                  |
| TSHR         | thyroid stimulating hormone receptor                               | NM_000369    | 1.979 | 0.863 |       |       | Signal transduction. Cell-cell signaling. Positive regulation of cell proliferation.                                 |
| CAPON        | C-terminal PDZ domain ligand of neuronal nitric oxide synthase     | NM_014697    | 1.978 | 0.872 |       |       | Neurotransmitter secretion. Regulation of nitric-oxide synthase activity.                                            |
| SATB1        | special AT-rich sequence binding protein 1                         | NM_002971    | 1.976 | 0.646 |       |       | Establishment and/or maintenance of chromatin architecture. Regulation of transcription, DNA-dependent.              |
| TF           | transferrin                                                        | NM_001063    |       |       | 1.975 | 0.687 | Iron ion transport. Iron ion homeostasis.                                                                            |
| PSD4         | PSD4 protein                                                       | BC035307     |       |       | 1.974 | 0.381 |                                                                                                                      |
| N/A          | N/A                                                                | AK128685     | 1.974 | 0.45  |       |       |                                                                                                                      |
| SLC25A18     | solute carrier                                                     | NM_031481    | 1.973 | 0.172 |       |       | Transport.                                                                                                           |
| FLJ32934     | hypothetical protein FLJ32934                                      | NM_144622    |       |       | 1.971 | 0.605 |                                                                                                                      |
| ZNF238       | zinc finger protein 238 isoform 1                                  | NM_205768    | 1.97  | 0.372 |       |       | Negative regulation of transcription from RNA polymerase II promoter.                                                |
| N/A          | G protein-coupled receptor PGR26                                   | AY255601     |       |       | 1.969 | 0.396 |                                                                                                                      |
| DKFZp547K146 | hypothetical protein                                               | AL834459     |       |       | 1.969 | 0.732 |                                                                                                                      |
| N/A          | N/A                                                                | AK130024     | 1.968 | 0.811 |       |       |                                                                                                                      |
| ZCCHC12      | * zinc finger, CCHC domain containing 12"                          | BC036572     | 1.962 | 0.65  |       |       |                                                                                                                      |
| GAB3         | Gab3 protein                                                       | NM_080612    | 1.962 | 0.983 |       |       |                                                                                                                      |
| TRP-2        | tyrosinase-related protein-2                                       | AJ000503     | 1.961 | 1.319 |       |       | Melanin metabolism. Melanin biosynthesis from tyrosine. Epidermis development.                                       |
| APOB         | apolipoprotein B precursor                                         | NM_000384    |       |       | 1.955 | 0.862 | Lipid metabolism. Lipid transport. Signal transduction. Circulation. Steroid metabolism.                             |
| CMYA4        | cardiomyopathy associated 4                                        | NM_173167    |       |       | 1.952 | 0.739 | Regulation of transcription, DNA-dependent. Mitotic chromosome condensation. Chromatin modification.                 |
| KCNH5        | * potassium voltage-gated channel, subfamily H, member 5 isoform 1 | NM_139318    | 1.949 | 1.021 |       |       | Two-component signal transduction system (phosphorelay). Cation transport. Potassium ion transport.                  |
| OR10P1       | olfactory receptor, family 10, subfamily P, member 1"              | NM_206899    |       |       | 1.944 | 0.267 |                                                                                                                      |
| GALNT14      | GALNT14 protein                                                    | BC010659     |       |       | 1.944 | 0.547 |                                                                                                                      |
| IFFP38       | IFFP38                                                             | NM_031943    |       |       | 1.943 | 0.67  |                                                                                                                      |
| N/A          | SIGLEC5                                                            | AY358369     | 1.942 | 0.719 |       |       |                                                                                                                      |
| BDNF         | brain-derived neurotrophic factor BDNF1                            | AY054392     | 1.94  | 1.098 |       |       | Neurogenesis.                                                                                                        |
| OR51T1       | * olfactory receptor, family 51, subfamily T, member 1"            | NM_001004759 | 1.938 | 0.78  |       |       |                                                                                                                      |
| N/A          | placenta expressed transcript 1                                    | AY364431     | 1.938 | 0.441 |       |       |                                                                                                                      |
| BTNL3        | butyrophilin-like 3 isoform a                                      | NM_197975    | 1.938 | 0.536 |       |       |                                                                                                                      |
| N/A          | N/A                                                                | AK125908     |       |       | 1.937 | 0.47  |                                                                                                                      |
| ERO1LB       | endoplasmic reticulum oxidoreductin 1-Lbeta                        | NM_019891    | 1.937 | 1.078 |       |       | Electron transport. Protein folding. Transport.                                                                      |
| tper25       | putative olfactory receptor                                        | X89672       | 1.935 | 0.704 |       |       |                                                                                                                      |
| N/A          | N/A                                                                | AK127400     | 1.934 | 1.001 |       |       | Protein amino acid phosphorylation. Signal transduction. Alcohol metabolism. Lipid metabolism. Metabolism.           |
| LOC112885    | hypothetical protein BC012187                                      | NM_138415    | 1.929 | 1.431 |       |       | Regulation of transcription, DNA-dependent.                                                                          |
| CST11        | cystatin 11 isoform 1 precursor                                    | NM_130794    |       |       | 1.927 | 0.497 |                                                                                                                      |
| CRX          | cone-rod homeobox protein                                          | NM_000554    |       |       | 1.926 | 0.407 | Regulation of transcription, DNA-dependent. Sensory perception. Visual perception. Organogenesis.                    |
| N/A          | N/A                                                                | AK128800     | 1.925 | 0.321 |       |       |                                                                                                                      |
| N/A          | Unknown (protein for IMAGE:4246623)                                | BC063134     | 1.924 | 0.488 |       |       |                                                                                                                      |
| Hox-2.2      | homeobox protein                                                   | AJ270993     | 1.924 | 0.649 |       |       | Regulation of transcription, DNA-dependent. Development. Determination of anterior/posterior axis, embryo.           |
| SLC9A2       | * solute carrier family 9 (sodium/hydrogen exchanger), isoform     | NM_003048    | 1.922 | 1.263 |       |       |                                                                                                                      |
| N/A          | N/A                                                                | AK055463     |       |       | 1.922 | 0.51  |                                                                                                                      |
| LOC51066     | LOC51066 protein                                                   | BC052614     |       |       | 1.922 | 0.519 |                                                                                                                      |
| PARP8        | * poly (ADP-ribose) polymerase family, member 8"                   | NM_024615    | 1.921 | 0.964 |       |       | Protein amino acid ADP-ribosylation.                                                                                 |
| N/A          | Unknown (protein for IMAGE:5206951)                                | BC030522     |       |       | 1.919 | 0.291 |                                                                                                                      |
| KRTAP10-3    | keratin associated protein KAP10.3                                 | AJ566383     |       |       | 1.919 | 0.315 |                                                                                                                      |
| CYP2A6       | cytochrome P450, family 2, subfamily A, polypeptide 6"             | NM_000762    |       |       | 1.918 | 0.358 | Electron transport. Transport.                                                                                       |
| FLJ38819     | hypothetical protein FLJ38819                                      | NM_145865    |       |       | 1.917 | 0.631 |                                                                                                                      |
| N/A          | N/A                                                                | AK125751     |       |       | 1.912 | 0.352 |                                                                                                                      |
| KRT6B        | keratin 6B                                                         | BC034535     | 1.91  | 0.88  |       |       | Ectoderm development.                                                                                                |
| PGLYRP4      | peptidoglycan recognition protein-I-beta precursor                 | NM_020393    | 1.909 | 0.397 |       |       | Peptidoglycan catabolism. Detection of bacteria. Innate immune response. Defense response to Gram-positive bacteria. |
| TNF-alpha    | tumor necrosis factor alpha                                        | AJ251878     |       |       | 1.907 | 0.349 |                                                                                                                      |
| OR10J3       | * olfactory receptor, family 10, subfamily J, member 3"            | NM_001004467 | 1.907 | 0.552 |       |       |                                                                                                                      |
| N/A          | Unknown (protein for IMAGE:4814381)                                | BC022493     | 1.907 | 0.607 |       |       |                                                                                                                      |
| FLJ00275     | FLJ00275 protein                                                   | AK090399     |       |       | 1.904 | 0.452 | Immune response. Response to virus.                                                                                  |

|                |                                                               |              |       |       |       |       |  |  |  |                                                                                                                       |
|----------------|---------------------------------------------------------------|--------------|-------|-------|-------|-------|--|--|--|-----------------------------------------------------------------------------------------------------------------------|
| FLJ46419       | FLJ46419 protein                                              | NM_001004314 | 1.903 | 1.295 |       |       |  |  |  |                                                                                                                       |
| SPANXB2        | * sperm protein associated with the nucleus, X chromosome, f  | NM_145664    |       |       | 1.902 | 0.794 |  |  |  | Spermatid cell development.                                                                                           |
| IVD            | isovaleryl Coenzyme A dehydrogenase                           | NM_002225    | 1.902 | 0.984 |       |       |  |  |  | Electron transport.                                                                                                   |
| N/A            | Unknown (protein for IMAGE:3454279)                           | BC000825     | 1.9   | 0.566 |       |       |  |  |  |                                                                                                                       |
| DKFZp547M202   | hypothetical proteincDNA DKFZp547M202 (from clone DKFZp       | AL512724     | 1.899 | 0.895 |       |       |  |  |  |                                                                                                                       |
| CYP11A1        | cytochrome P450, subfamily X1A precursor*                     | NM_000781    |       |       | 1.899 | 0.471 |  |  |  | Electron transport. Lipid metabolism. C21-steroid hormone biosynthesis. Androgen biosynthesis. Steroid metabolism.    |
| CYP17A1        | * cytochrome P450, family 17*                                 | NM_000102    | 1.898 | 0.333 |       |       |  |  |  | Electron transport. C21-steroid hormone biosynthesis. Transport. Sex differentiation.                                 |
| GPR154         | G protein-coupled receptor 154 isoform A                      | NM_207172    | 1.894 | 0.731 |       |       |  |  |  |                                                                                                                       |
| FLJ22795       | FLJ22795 protein                                              | BC007811     | 1.893 | 0.68  |       |       |  |  |  |                                                                                                                       |
| CYP2A13        | cytochrome P450, family 2, subfamily A, polypeptide 13*       | NM_000766    |       |       | 1.891 | 0.506 |  |  |  | Electron transport.                                                                                                   |
| N/A            | N/A                                                           | AK126866     |       |       | 1.888 | 0.572 |  |  |  |                                                                                                                       |
| N/A            | heat shock protein 86                                         | M30627       | 1.08  | 1.211 | 1.886 | 0.487 |  |  |  | Protein folding. Response to unfolded protein.                                                                        |
| KRTHB4         | keratin, hair, basic, 4*                                      | NM_033045    |       |       | 1.886 | 0.489 |  |  |  |                                                                                                                       |
| FLJ43870       | FLJ43870 protein                                              | NM_001001686 |       |       | 1.886 | 0.463 |  |  |  |                                                                                                                       |
| TM4SF5         | transmembrane 4 superfamily member 5                          | NM_003963    |       |       | 1.885 | 0.8   |  |  |  | N-linked glycosylation.                                                                                               |
| PPY2           | pancreatic polypeptide 2                                      | NM_021092    |       |       | 1.885 | 0.542 |  |  |  |                                                                                                                       |
| K6IRS2         | keratin protein K6irs                                         | NM_080747    |       |       | 1.884 | 0.313 |  |  |  |                                                                                                                       |
| FLJ42654       | FLJ42654 protein                                              | NM_198447    | 1.883 | 1.108 |       |       |  |  |  | Vesicle-mediated transport.                                                                                           |
| ZNFS74         | zinc finger protein 574                                       | NM_022752    |       |       | 1.882 | 0.622 |  |  |  |                                                                                                                       |
| ROR2           | receptor tyrosine kinase-like orphan receptor 2 precursor     | NM_004560    | 1.882 | 0.563 |       |       |  |  |  | Protein amino acid phosphorylation. Signal transduction. Development.                                                 |
| ProSAPIP1      | ProSAPIP1 protein                                             | NM_014731    |       |       | 1.882 | 0.378 |  |  |  |                                                                                                                       |
| MUSK           | * muscle, skeletal, receptor tyrosine kinase*                 | NM_005592    | 1.882 | 0.426 |       |       |  |  |  | Protein amino acid phosphorylation. Muscle development.                                                               |
| PSME3          | proteasome activator subunit 3 isoform 2 * Ki (PSME3), transc | NM_176863    | 1.88  | 0.816 |       |       |  |  |  |                                                                                                                       |
| N/A            | unknown                                                       | AF289571     | 1.879 | 0.757 |       |       |  |  |  |                                                                                                                       |
| FOXO1A         | forkhead box O1A                                              | NM_002015    | 1.878 | 0.75  |       |       |  |  |  | Transcription. Regulation of transcription from RNA polymerase II promoter. Anti-apoptosis.                           |
| EDA2R          | X-linked ectodysplasin receptor                               | BC034919     | 1.878 | 1.212 |       |       |  |  |  | Epidermis development. Embryonic development. Cell differentiation. Positive regulation of JNK cascade.               |
| PRRG4          | proline rich Gla (G-carboxyglutamic acid) 4 (transmembrane)   | NM_024081    | 1.213 | 1.083 | 1.877 | 0.663 |  |  |  |                                                                                                                       |
| NRG2           | neuregulin 2 isoform 3                                        | NM_013982    |       |       | 1.877 | 0.324 |  |  |  | Anti-apoptosis. Signal transduction. Cell-cell signaling. Embryonic development.                                      |
| KIAA1127       | KIAA1127 protein                                              | AB032953     | 1.876 | 0.766 |       |       |  |  |  |                                                                                                                       |
| N/A            | N/A                                                           | AK027267     | 1.875 | 1.063 |       |       |  |  |  | Small GTPase mediated signal transduction.                                                                            |
| FLJ43339       | FLJ43339 protein                                              | NM_207380    | 1.873 | 0.797 |       |       |  |  |  |                                                                                                                       |
| LOC144347      | hypothetical protein LOC144347                                | NM_181709    | 1.871 | 0.879 |       |       |  |  |  |                                                                                                                       |
| CCL22          | small inducible cytokine A22 precursor                        | NM_002990    |       |       | 1.871 | 0.532 |  |  |  | Chemotaxis. Inflammatory response. Signal transduction. Cell-cell signaling. Sensory perception.                      |
| DKFZp686J24109 | hypothetical proteincDNA DKFZp686J24109 (from clone DKFZ      | BX641153     | 1.87  | 0.668 |       |       |  |  |  |                                                                                                                       |
| Shrml          | Shroom-related protein                                        | NM_020859    | 1.868 | 0.477 |       |       |  |  |  |                                                                                                                       |
| MPP6           | * membrane protein, palmitoylated 6*                          | NM_016447    | 1.868 | 0.777 |       |       |  |  |  | Protein complex assembly.                                                                                             |
| IL1RAPL2       | interleukin 1 receptor accessory protein-like 2               | NM_017416    |       |       | 1.868 | 0.438 |  |  |  | Central nervous system development.                                                                                   |
| IL1F6          | interleukin 1 family, member 6 (epsilon)*                     | NM_014440    |       |       | 1.865 | 0.32  |  |  |  | Inflammatory response.                                                                                                |
| FLJ12455       | hypothetical protein FLJ12455                                 | NM_022078    | 1.864 | 0.29  |       |       |  |  |  |                                                                                                                       |
| SLCO2A1        | solute carrier organic anion transporter family, member 2A1*  | NM_005630    |       |       | 1.863 | 0.796 |  |  |  | Lipid transport.                                                                                                      |
| RLN2           | relaxin 2 isoform 2                                           | NM_005059    | 1.862 | 0.361 |       |       |  |  |  | Pregnancy. Physiological process.                                                                                     |
| N/A            | N/A                                                           | AK127271     | 1.862 | 0.733 |       |       |  |  |  |                                                                                                                       |
| CBX7           | chromobox homolog 7                                           | NM_175709    | 1.858 | 0.812 |       |       |  |  |  | Chromatin assembly or disassembly. Transcription. Regulation of transcription, DNA-dependent. Chromatin modification. |
| LOC129531      | hypothetical protein BC018453                                 | NM_138798    | 1.854 | 1.701 |       |       |  |  |  |                                                                                                                       |
| LAMP3          | lysosomal-associated membrane protein 3                       | NM_014398    | 1.854 | 0.975 |       |       |  |  |  | Cell proliferation.                                                                                                   |
| C9orf87        | chromosome 9 open reading frame 87                            | NM_018112    | 1.854 | 1.343 |       |       |  |  |  |                                                                                                                       |
| N/A            | N/A                                                           | AK127186     | 1.851 | 0.773 |       |       |  |  |  |                                                                                                                       |
| HRG            | histidine-rich glycoprotein precursor                         | NM_000412    |       |       | 1.851 | 0.31  |  |  |  |                                                                                                                       |
| FLJ25421       | hypothetical protein FLJ25421                                 | NM_152512    |       |       | 1.847 | 0.435 |  |  |  |                                                                                                                       |
| RYR3           | ryanodine receptor 3                                          | NM_001036    |       |       | 1.843 | 0.503 |  |  |  | Cation transport. Calcium ion transport. Calcium ion homeostasis.                                                     |
| OR2D2          | * olfactory receptor, family 2, subfamily D, member 2*        | NM_003700    | 1.843 | 0.905 |       |       |  |  |  |                                                                                                                       |
| HLA-DQA1       | MHC class II antigen                                          | AF533931     |       |       | 1.843 | 0.57  |  |  |  |                                                                                                                       |
| DKFZp434L2319  | hypothetical proteincDNA DKFZp434L2319 (from clone DKFZ       | AL833908     | 1.843 | 0.482 |       |       |  |  |  |                                                                                                                       |
| SGEF           | DKFZP434D146 protein                                          | NM_015595    | 1.842 | 0.784 |       |       |  |  |  |                                                                                                                       |
| AQP2           | aquaporin 2                                                   | NM_000486    |       |       | 1.835 | 0.407 |  |  |  | Transport. Water transport. Excretion.                                                                                |
| UNQ473         | DMC                                                           | NM_198477    |       |       | 1.834 | 0.656 |  |  |  |                                                                                                                       |

|                |                                                                    |              |       |       |       |       |       |       |                                                    |                                                                                                                  |
|----------------|--------------------------------------------------------------------|--------------|-------|-------|-------|-------|-------|-------|----------------------------------------------------|------------------------------------------------------------------------------------------------------------------|
| ZP2            | zona pellucida glycoprotein 2 preproprotein                        | NM_003460    |       |       |       |       | 1.833 | 0.791 | Fertilization. Binding of sperm to zona pellucida. |                                                                                                                  |
| pyruvate       | pyruvate dehydrogenase alpha subunit                               | S57358       | 1.311 | 1.534 |       |       | 0.93  |       | Acetyl-CoA metabolism. Glycolysis.                 |                                                                                                                  |
| PCSK6          | paired basic amino acid cleaving system 4 isoform a prepropro      | NM_002570    |       |       |       | 1.833 |       | 1.83  | 0.816                                              | Proteolysis and peptidolysis. Cell-cell signaling.                                                               |
| FBP2           | fructose-1,6-bisphosphatase 2"                                     | NM_003837    |       |       |       |       |       | 1.829 | 0.387                                              | Carbohydrate metabolism. Fructose metabolism. Gluconeogenesis.                                                   |
| N/A            | N/A                                                                | AK125451     |       |       |       |       |       | 1.828 | 1.113                                              |                                                                                                                  |
| OR5AR1         | " olfactory receptor, family 5, subfamily AR, member 1"            | NM_001004730 | 1.144 | 1.477 |       |       | 1.827 | 1.2   |                                                    |                                                                                                                  |
| ELA1           | " elastase 1, pancreatic"                                          | NM_001971    |       |       |       | 1.827 |       | 0.868 |                                                    | Proteolysis and peptidolysis.                                                                                    |
| OR1J4          | " olfactory receptor, family 1, subfamily J, member 4"             | NM_001004452 |       |       |       | 1.826 |       | 0.551 |                                                    |                                                                                                                  |
| HNF4A          | hepatocyte nuclear factor 4 alpha isoform b                        | NM_000457    |       |       |       |       |       | 1.826 | 0.459                                              | Regulation of transcription, DNA-dependent. Lipid metabolism.                                                    |
| FCN1           | ficolin 1 precursor                                                | NM_002003    |       |       |       |       |       | 1.826 | 0.382                                              | Phosphate transport. Cell adhesion. Opsonization.                                                                |
| N/A            | protease serine 2 isoform B                                        | AY052784     |       |       |       |       |       | 1.825 | 0.391                                              | Proteolysis and peptidolysis. Digestion. Negative regulation of blood coagulation.                               |
| CPN1           | carboxypeptidase N, polypeptide 1, 50kD, precursor"                | BC027897     |       |       |       |       |       | 1.823 | 0.737                                              | Proteolysis and peptidolysis.                                                                                    |
| ADAMTS19       | " a disintegrin-like and metalloprotease (reprolysin type) with tl | NM_133638    |       |       |       | 1.823 |       | 0.936 |                                                    |                                                                                                                  |
| PROX1          | prospero-related homeobox 1                                        | NM_002763    |       |       |       | 1.822 |       | 1.185 |                                                    |                                                                                                                  |
| GUCA2B         | guanylate cyclase activator 2B (uroguanylin)                       | NM_007102    |       |       |       |       |       | 1.822 | 0.77                                               | Excretion.                                                                                                       |
| N/A            | N/A                                                                | AK127499     |       |       |       |       |       | 1.82  | 0.422                                              |                                                                                                                  |
| N/A            | unknown                                                            | AF218021     |       |       |       | 1.82  |       | 0.597 |                                                    |                                                                                                                  |
| KRT6A          | keratin 6A                                                         | BC008807     |       |       |       |       |       | 1.82  | 0.421                                              | Ectoderm development. Cytoskeleton organization and biogenesis.                                                  |
| N/A            | N/A                                                                | AK128402     |       |       |       |       |       | 1.819 | 0.527                                              |                                                                                                                  |
| N/A            | N/A                                                                | AK128106     |       |       |       | 1.818 |       | 0.38  |                                                    |                                                                                                                  |
| N/A            | GHRH receptor splice variant 1                                     | AF282259     |       |       |       |       |       | 1.818 | 0.519                                              | Skeletal development. Signal transduction. G-protein coupled receptor protein signaling pathway.                 |
| MUC4           | mucin 4 isoform a                                                  | NM_018406    |       |       |       |       |       | 1.818 | 0.584                                              | Cell-matrix adhesion.                                                                                            |
| MGC15730       | hypothetical protein MGC15730                                      | NM_032880    |       |       |       |       |       | 1.817 | 0.767                                              | Cell adhesion.                                                                                                   |
| IL1F9          | interleukin 1 family, member 9"                                    | NM_019618    |       |       |       |       |       | 1.816 | 0.691                                              | Inflammatory response. Cell-cell signaling.                                                                      |
| TDGF1          | teratocarcinoma-derived growth factor 1                            | NM_003212    |       |       |       | 1.815 |       | 0.377 |                                                    | Activation of MAPK. Branching morphogenesis. Heart development. Positive regulation of cell proliferation.       |
| SPARCL1        | SPARC-like 1                                                       | NM_004684    |       |       |       | 1.812 |       | 0.712 |                                                    |                                                                                                                  |
| LPO            | lactoperoxidase                                                    | NM_006151    |       |       |       | 1.812 |       | 0.905 |                                                    | Response to oxidative stress.                                                                                    |
| UCN            | urocortin preproprotein                                            | NM_003353    |       |       |       |       |       | 1.811 | 0.746                                              | G-protein coupled receptor protein signaling pathway.                                                            |
| DKFZp434J1027  | hypothetical protein cDNA DKFZp434J1027 (from clone DKFZp          | AL133084     |       |       |       | 1.811 |       | 0.694 |                                                    |                                                                                                                  |
| CARD14         | caspase recruitment domain protein 14 isoform 1                    | NM_024110    |       |       |       |       |       | 1.811 | 0.35                                               | Activation of NF-kappaB-inducing kinase. Regulation of apoptosis.                                                |
| BAPX1          | bagpipe homeobox 1                                                 | NM_001189    |       |       |       | 1.811 |       | 0.717 |                                                    | Skeletal development. Regulation of transcription, DNA-dependent. Transcription from RNA polymerase II promoter. |
| ADAM2          | a disintegrin and metalloproteinase domain 2 proprotein            | NM_001464    |       |       |       | 1.811 |       | 0.915 |                                                    | Proteolysis and peptidolysis. Cell adhesion. Fusion of sperm to egg plasma membrane.                             |
| SPG3A          | atlastin                                                           | NM_181598    |       |       |       | 1.81  |       | 0.544 |                                                    | Immune response.                                                                                                 |
| AP1M2          | adaptor-related protein complex 1, mu 2 subunit"                   | BC005021     |       |       |       |       |       | 1.81  | 0.283                                              | Protein targeting. Endocytosis. Vesicle targeting.                                                               |
| NDRF           | neuroD-related factor                                              | AB021742     |       |       |       |       |       | 1.809 | 0.767                                              | Transcription. Neurogenesis. Cell differentiation.                                                               |
| DKFZp686O08126 | hypothetical protein                                               | BX641066     |       |       |       |       |       | 1.809 | 0.696                                              | Regulation of transcription, DNA-dependent.                                                                      |
| TEX15          | testis expressed sequence 15                                       | NM_031271    |       |       |       | 1.808 |       | 0.956 |                                                    |                                                                                                                  |
| N/A            | FKBP14                                                             | AY358643     |       |       |       | 1.808 |       | 1.397 |                                                    | Protein amino acid phosphorylation. Signal transduction. Alcohol metabolism. Lipid metabolism. Metabolism.       |
| APOF           | apolipoprotein F precursor                                         | NM_001638    |       |       |       | 1.808 |       | 0.899 |                                                    | Lipid metabolism. Lipid transport. Steroid metabolism. Cholesterol metabolism.                                   |
| N/A            | myosin                                                             | L29147       |       |       |       |       |       | 1.807 | 0.511                                              |                                                                                                                  |
| LOC90167       | hypothetical protein LOC90167                                      | NM_194277    |       |       |       | 1.807 |       | 0.256 |                                                    |                                                                                                                  |
| N/A            | IL20                                                               | AY358320     |       |       |       | 1.806 |       | 0.655 |                                                    | Immune response. Hemopoiesis. Positive regulation of tyrosine phosphorylation of Stat3 protein.                  |
| N/A            | OBP2B                                                              | AY358981     |       |       |       |       |       | 1.805 | 0.4                                                | Chemosensory behavior. Electron transport. Perception of smell.                                                  |
| N/A            | N/A                                                                | AK125132     |       |       |       | 1.803 |       | 0.505 |                                                    |                                                                                                                  |
| N/A            | N/A                                                                | AK124469     |       |       |       |       |       | 1.803 | 0.957                                              |                                                                                                                  |
| 5-HTR3B        | 5-hydroxytryptamine 3 receptor B subunit                           | AF169255     |       |       |       | 1.803 |       | 0.436 |                                                    | Ion transport. Synaptic transmission.                                                                            |
| WASF3          | WASF3 protein                                                      | BC050283     |       |       |       | 1.802 |       | 0.737 |                                                    | Protein complex assembly. Actin filament polymerization.                                                         |
| UNQ9433        | RPLK9433                                                           | NM_207413    |       |       |       | 1.798 |       | 0.732 |                                                    |                                                                                                                  |
| FLJ00167       | FLJ00167 protein                                                   | AK074096     |       |       |       |       |       | 1.798 | 0.565                                              |                                                                                                                  |
| IL2RB          | interleukin 2 receptor beta precursor                              | NM_000878    |       |       |       |       |       | 1.795 | 0.496                                              | Protein complex assembly. Immune response. Signal transduction.                                                  |
| CENTB1         | centaurin beta 1                                                   | NM_014716    |       |       |       |       |       | 1.795 | 1.089                                              | Intracellular signaling cascade. Regulation of GTPase activity.                                                  |
| TTN            | titin isoform N2-A                                                 | NM_133378    | 1.153 | 0.909 | 1.794 | 0.674 |       |       |                                                    | Carbohydrate metabolism. Protein amino acid phosphorylation. Striated muscle contraction.                        |
| GAC1           | glioma amplified on chromosome 1 protein                           | AF030435     |       |       |       |       |       | 1.793 | 0.801                                              | Cell adhesion. Signal transduction.                                                                              |
| RPE65          | retinal pigment epithelium-specific protein 65kDa                  | NM_000329    |       |       |       | 1.791 |       | 0.64  |                                                    | Vitamin A metabolism. Sensory perception. Visual perception.                                                     |
| FLJ25770       | hypothetical protein FLJ25770                                      | NM_178555    |       |       |       | 1.791 |       | 0.602 |                                                    |                                                                                                                  |
| CSH1           | chorionic somatomammotropin hormone 1 isoform 2                    | NM_022640    |       |       |       |       |       | 1.791 | 0.439                                              |                                                                                                                  |



|           |                                                                        |           |       |       |       |       |       |                                                                                                      |
|-----------|------------------------------------------------------------------------|-----------|-------|-------|-------|-------|-------|------------------------------------------------------------------------------------------------------|
| N/A       | G protein-coupled receptor MRGG                                        | AY255583  |       |       |       | 1.789 | 0.53  |                                                                                                      |
| N/A       | N/A                                                                    | AK096781  | 1.246 |       |       | 1.789 |       |                                                                                                      |
| FLJ00400  | FLJ00400 protein                                                       | AK090478  |       |       |       | 1.787 | 0.871 |                                                                                                      |
| CRYBB3    | crystallin, beta B3*                                                   | NM_004076 |       |       |       | 1.785 | 0.308 | Visual perception.                                                                                   |
| SNFT      | Jun dimerization protein p21SNFT                                       | NM_018664 |       | 1.781 | 0.945 |       |       | Regulation of transcription, DNA-dependent. Response to pest, pathogen or parasite.                  |
| N/A       | N/A                                                                    | AK126047  |       |       |       | 1.78  | 0.547 | Protein amino acid phosphorylation. Signal transduction. Alcohol metabolism. Lipid metabolism.       |
| BMP3      | bone morphogenetic protein 3 (osteogenic) precursor                    | NM_001201 |       | 1.78  | 0.345 |       |       | Skeletal development. Cell-cell signaling. Cell differentiation.                                     |
| N/A       | N/A                                                                    | AK122638  |       |       |       | 1.779 | 0.337 |                                                                                                      |
| FLJ33708  | hypothetical protein FLJ33708                                          | NM_173675 |       | 1.778 | 0.515 |       |       |                                                                                                      |
| HLA-DPA1  | major histocompatibility complex, class II, DP alpha 1 precursor       | NM_033554 |       |       |       | 1.777 | 0.884 | Immune response. Antigen presentation, exogenous antigen. Antigen processing.                        |
| SPINLW1   | * serine protease inhibitor-like, with Kunitz and WAP domains          | NM_181502 | 1.884 | 1.37  |       | 1.776 | 0.874 |                                                                                                      |
| RGS7      | regulator of G-protein signalling 7                                    | NM_002924 |       | 1.775 | 0.873 |       |       | Intracellular signaling cascade. Regulation of G-protein coupled receptor protein signaling pathway. |
| SLC6A1    | solute carrier family 6 (neurotransmitter transporter, GABA), member 1 | NM_003042 |       |       |       | 1.774 | 1.156 | Neurotransmitter transport. Synaptic transmission.                                                   |
| PIK3R4    | * phosphoinositide-3-kinase, regulatory subunit 4, p150*               | NM_014602 |       | 1.774 | 1.095 |       |       | Protein amino acid phosphorylation. Mitotic chromosome condensation. Meiosis.                        |
| GDF10     | growth differentiation factor 10 precursor                             | NM_004962 |       |       |       | 1.774 | 1.123 | Skeletal development. Transforming growth factor beta receptor signaling pathway.                    |
| APP       | * amyloid beta A4 protein precursor, isoform a*                        | NM_000484 |       | 1.774 | 1.217 |       |       | Copper ion homeostasis. Endocytosis. Apoptosis. Cell adhesion. Signal transduction. Cell death.      |
| PCDH8     | protocadherin 8 isoform 1 precursor                                    | NM_002590 |       |       |       | 1.773 | 0.55  | Cell adhesion. Homophilic cell adhesion. Cell-cell signaling.                                        |
| LTA       | lymphotoxin alpha precursor                                            | NM_000595 |       |       |       | 1.773 | 0.679 | Induction of apoptosis. Immune response. Signal transduction. Cell-cell signaling.                   |
| C21orf89  | C21orf89 protein                                                       | AF426268  |       |       |       | 1.771 | 0.601 |                                                                                                      |
| LOC136306 | hypothetical protein LOC136306                                         | NM_174959 |       | 1.769 | 0.833 |       |       |                                                                                                      |
| FERD3L    | nephew of atonal 3                                                     | NM_152898 |       |       |       | 1.767 | 0.642 |                                                                                                      |
| ZNF423    | zinc finger protein 423                                                | NM_015069 |       |       |       | 1.764 | 0.483 |                                                                                                      |
| RPL24     | ribosomal protein L24                                                  | NM_000986 |       | 1.763 | 1.015 |       |       | Protein biosynthesis.                                                                                |
| RGR       | retinal G protein coupled receptor                                     | NM_002921 |       |       |       | 1.763 | 0.745 | Signal transduction. G-protein coupled receptor protein signaling pathway.                           |
| LR8       | LR8 protein                                                            | NM_014020 |       |       |       | 1.761 | 0.439 | Organogenesis.                                                                                       |
| LRP11     | LRP11 protein                                                          | BC016788  |       | 1.76  | 1.147 |       |       |                                                                                                      |
| GLUT10    | glucose transporter                                                    | AF248053  |       | 1.76  | 1.241 |       |       | Carbohydrate transport. Glucose transport.                                                           |
| FLJ00411  | FLJ00411 protein                                                       | AK122586  |       |       |       | 1.76  | 0.57  | Inflammatory response. Cell-matrix adhesion. Cell-cell adhesion.                                     |
| SEC14L3   | SEC14-like 3                                                           | NM_174975 |       |       |       | 1.759 | 0.348 | Transport. Intracellular protein transport.                                                          |
| LY9       | lymphocyte antigen 9 precursor                                         | AF055708  |       |       |       | 1.759 | 0.443 | Cell adhesion. Humoral defense mechanism.                                                            |
| KIAA1719  | KIAA1719 protein                                                       | AB051506  |       |       |       | 1.759 | 0.846 |                                                                                                      |
| C14orf66  | sphingolipid C4-hydroxylase/delta 4-desaturase                         | NM_206918 |       |       |       | 1.758 | 0.849 |                                                                                                      |
| N/A       | N/A                                                                    | AK127689  |       |       |       | 1.757 | 0.565 |                                                                                                      |
| RND1      | GTP-binding protein RHO6                                               | NM_014470 |       | 1.756 | 0.846 |       |       | Actin filament organization. Negative regulation of cell adhesion. Neuronal remodeling.              |
| SFTPD     | surfactant, pulmonary-associated protein D*                            | NM_003019 |       |       |       | 1.755 | 0.499 | Regulation of cytokine production. Oxygen and reactive oxygen species metabolism.                    |
| c-myb     | v-myb myeloblastosis viral oncogene homologue (avian)                  | AJ066319  |       | 1.755 | 0.981 |       |       | Regulation of transcription, DNA-dependent.                                                          |
| STK22D    | spermiogenesis associated serine/threonine kinase 22D                  | NM_032028 |       | 1.754 | 1.102 |       |       |                                                                                                      |
| RORC      | RAR-related orphan receptor C isoform a                                | NM_005060 |       |       |       | 1.754 | 0.745 | Regulation of transcription, DNA-dependent.                                                          |
| N/A       | apolipoprotein A-IV precursor                                          | X13629    |       |       |       | 1.754 | 0.626 | Lipid metabolism.                                                                                    |
| C14orf115 | chromosome 14 open reading frame 115                                   | BC053325  | 1.479 | 1.217 |       | 1.754 | 0.735 | DNA transposition.                                                                                   |
| LOC400120 | hypothetical LOC400120                                                 | NM_203451 |       |       |       | 1.753 | 0.663 |                                                                                                      |
| MUC15     | mucin 15                                                               | NM_145650 |       | 1.752 | 0.331 |       |       |                                                                                                      |
| NKp44RG2  | N/A                                                                    | AJ010100  |       |       |       | 1.751 | 0.568 | Cellular defense response. Signal transduction.                                                      |
| N/A       | Unknown (protein for MGC:33988)                                        | BC029542  |       |       |       | 1.751 | 0.384 |                                                                                                      |
| N/A       | N/A                                                                    | AK057244  |       |       |       | 1.751 | 0.492 |                                                                                                      |
| DBCCR1L   | DBCCR1-like                                                            | NM_199051 |       | 1.749 | 1.061 |       |       |                                                                                                      |
| FLJ46361  | FLJ46361 protein                                                       | NM_198577 |       | 1.748 | 0.743 |       |       |                                                                                                      |
| FGF20     | fibroblast growth factor 20                                            | NM_019851 |       | 1.748 | 1.331 |       |       | Signal transduction. Cell-cell signaling.                                                            |
| ZDHC21    | * zinc finger, DHHC domain containing 21*                              | NM_178566 |       | 1.746 | 0.775 |       |       |                                                                                                      |
| CIB3      | DNA-dependent protein kinase catalytic subunit-interacting protein     | NM_054113 |       |       |       | 1.746 | 0.775 |                                                                                                      |
| FLJ32785  | hypothetical protein FLJ32785                                          | NM_152494 |       |       |       | 1.745 | 0.502 | Protein ubiquitination.                                                                              |
| N/A       | Unknown (protein for MGC:70902)                                        | BC065260  |       | 1.743 | 0.814 |       |       |                                                                                                      |
| N/A       | Unknown (protein for MGC:18299)                                        | BC008624  |       | 1.742 | 0.854 |       |       |                                                                                                      |
| KIAA1359  | KIAA1359 protein                                                       | AB037780  |       |       |       | 1.741 | 0.316 |                                                                                                      |
| GRB14     | growth factor receptor-bound protein 14                                | NM_004490 |       | 1.741 | 0.811 |       |       | Intracellular signaling cascade.                                                                     |
| SPANXB2   | * sperm protein associated with the nucleus, X chromosome, family 1    | NM_145664 |       |       |       | 1.739 | 0.768 | Spermatid cell development.                                                                          |

|                |                                                                    |           |       |       |  |       |       |       |                                                                                                                            |
|----------------|--------------------------------------------------------------------|-----------|-------|-------|--|-------|-------|-------|----------------------------------------------------------------------------------------------------------------------------|
| NGEF           | neuronal guanine nucleotide exchange factor                        | NM_019850 |       |       |  |       | 1.739 | 0.513 |                                                                                                                            |
| N/A            | Unknown (protein for IMAGE:4944653)                                | BC060318  |       |       |  |       | 1.738 | 0.891 |                                                                                                                            |
| N/A            | N/A                                                                | AK127768  |       |       |  |       | 1.738 | 0.422 |                                                                                                                            |
| FLJ30934       | hypothetical protein FLJ30934                                      | NM_152760 |       |       |  |       | 1.737 | 0.855 | Intracellular signaling cascade. Protein transport.                                                                        |
| LCN2           | lipocalin 2 (oncogene 24p3)                                        | NM_005564 |       |       |  |       | 1.736 | 0.457 | Transport.                                                                                                                 |
| pp9974         | unknown                                                            | AF318382  |       |       |  |       | 1.735 | 0.683 |                                                                                                                            |
| N/A            | N/A                                                                | AK097143  | 1.01  | 1.168 |  |       | 1.735 | 0.566 |                                                                                                                            |
| N/A            | N/A                                                                | AK094872  |       |       |  |       | 1.735 | 0.497 | Aromatic compound metabolism.                                                                                              |
| CCL17          | small inducible cytokine A17 precursor                             | NM_002987 |       |       |  |       | 1.734 | 0.17  | Chemotaxis. Inflammatory response. G-protein coupled receptor protein signaling pathway. Cell-cell signaling. Development. |
| DKFZp686F10110 | hypothetical protein cDNA DKFZp686F10110 (from clone DKFZ BX640641 |           |       |       |  | 1.733 | 0.872 |       | Protein amino acid phosphorylation. Signal transduction. Alcohol metabolism. Lipid metabolism.                             |
| N/A            | N/A                                                                | AK127849  |       |       |  | 1.732 | 1.08  |       |                                                                                                                            |
| PAPLN          | papilin                                                            | NM_173462 |       |       |  |       | 1.731 | 0.771 |                                                                                                                            |
| Nbla00761      | RIM short form                                                     | AB045726  |       |       |  | 1.731 | 0.553 |       |                                                                                                                            |
| N/A            | N/A                                                                | AK124375  |       |       |  |       | 1.731 | 0.32  |                                                                                                                            |
| IL1F10         | interleukin 1 family, member 10*                                   | NM_032556 |       |       |  |       | 1.731 | 0.909 | Inflammatory response.                                                                                                     |
| N/A            | Similar to RIKEN cDNA 4933430H15 gene                              | BC033790  |       |       |  | 1.729 | 0.519 |       |                                                                                                                            |
| C6orf52        | C6orf52 protein                                                    | BC016820  |       |       |  | 1.729 | 0.709 |       |                                                                                                                            |
| SLC16A14       | * solute carrier family 16 (monocarboxylic acid transporters), n   | NM_152527 |       |       |  | 1.728 | 0.472 |       | Transport.                                                                                                                 |
| BMPRI1B        | * bone morphogenetic protein receptor, type IB*                    | NM_001203 |       |       |  | 1.725 | 0.83  |       | Skeletal development. Cartilage condensation. Ovarian cumulus expansion. Eye morphogenesis.                                |
| SALL4          | sal-like 4                                                         | NM_020436 |       |       |  | 1.72  | 0.757 |       | Regulation of transcription, DNA-dependent.                                                                                |
| USH3A          | USH3A protein isoform a                                            | NM_174878 |       |       |  | 1.719 | 0.758 |       |                                                                                                                            |
| LSR68          | lipopolysaccharide specific response-68 protein                    | AF147723  |       |       |  | 1.718 | 0.651 |       | Protein amino acid phosphorylation. Signal transduction. Alcohol metabolism. Lipid metabolism. Metabolism.                 |
| KIAA0883       | KIAA0883 protein                                                   | AB020690  |       |       |  |       | 1.718 | 0.707 |                                                                                                                            |
| MGC11242       | hypothetical protein MGC11242                                      | NM_024320 |       |       |  |       | 1.717 | 0.328 |                                                                                                                            |
| RDH-E2         | retinal short chain dehydrogenase reductase                        | NM_138969 |       |       |  |       | 1.715 | 0.752 | Metabolism.                                                                                                                |
| GRB7           | growth factor receptor-bound protein 7                             | NM_005310 |       |       |  |       | 1.715 | 0.813 | Signal transduction. Epidermal growth factor receptor signaling pathway. Intracellular signaling cascade.                  |
| N/A            | N/A                                                                | AK094751  |       |       |  |       | 1.714 | 0.526 |                                                                                                                            |
| FLJ41287       | FLJ41287 protein                                                   | NM_207381 |       |       |  | 1.712 | 0.656 |       | Protein amino acid phosphorylation. Signal transduction. Alcohol metabolism. Lipid metabolism. Metabolism.                 |
| FLJ13798       | hypothetical protein FLJ13798                                      | NM_024773 |       |       |  | 1.712 | 0.599 |       |                                                                                                                            |
| N/A            | N/A                                                                | AK127951  |       |       |  |       | 1.711 | 0.388 | Protein amino acid phosphorylation. Signal transduction. Alcohol metabolism. Lipid metabolism.                             |
| N/A            | N/A                                                                | AK074597  |       |       |  |       | 1.71  | 0.521 | Extracellular matrix organization and biogenesis.                                                                          |
| RBP3           | N/A                                                                | NM_002900 |       |       |  |       | 1.707 | 0.563 | Proteolysis and peptidolysis. Lipid metabolism. Transport. Visual perception.                                              |
| N/A            | N/A                                                                | AK095511  | 1.707 | 0.403 |  |       |       |       |                                                                                                                            |
| MLC1           | MLC1 protein                                                       | BC010518  |       |       |  |       | 1.707 | 0.42  | Protein biosynthesis. Ion transport.                                                                                       |
| TRADD          | TNFRSF1A-associated via death domain isoform 2                     | NM_153425 |       |       |  |       | 1.706 | 0.414 | Induction of apoptosis. Signal transduction. Positive regulation of I-kappaB kinase/NF-kappaB.                             |
| SLC13A4        | * solute carrier family 13 (sodium/sulfate symporters), member     | BC030689  |       |       |  | 1.706 | 1.02  |       | Ion transport. Sodium ion transport. Sulfate transport. Response to pest, pathogen or parasite.                            |
| PTH            | parathyroid hormone preproprotein                                  | NM_000315 | 1.597 | 1.519 |  | 1.702 | 0.79  |       | Skeletal development. Calcium ion homeostasis. G-protein coupled receptor protein signaling pathway. Cell-cell signaling.  |
| N/A            | genethonin 3                                                       | AF177292  |       |       |  | 1.701 | 0.328 |       |                                                                                                                            |
| LOC167127      | hypothetical protein LOC167127                                     | NM_174914 |       |       |  |       | 1.701 | 0.803 | Metabolism.                                                                                                                |
| CEACAM8        | carcinoembryonic antigen-related cell adhesion molecule 8          | NM_001816 |       |       |  |       | 1.698 | 0.608 | Immune response. Pregnancy.                                                                                                |
| NFE2L3         | nuclear factor (erythroid-derived 2)-like 3                        | NM_004289 |       |       |  | 1.696 | 1.344 |       | Regulation of transcription, DNA-dependent.                                                                                |
| MYL2           | MYL2 protein                                                       | BC015821  |       |       |  |       | 1.695 | 0.37  | Regulation of striated muscle contraction. Muscle development.                                                             |
| ERRB2          | nuclear receptor ERBB2                                             | AF094517  |       |       |  |       | 1.693 | 0.399 | Regulation of transcription, DNA-dependent.                                                                                |
| SPIC           | SPI-C transcription factor                                         | AF518404  |       |       |  | 1.692 | 1.153 |       |                                                                                                                            |
| SLC5A10        | * solute carrier family 5 (sodium/glucose cotransporter), mem      | NM_152351 | 1.744 | 2.16  |  |       | 1.692 | 0.322 | Transport.                                                                                                                 |
| SLC13A5        | solute carrier family 13 (sodium-dependent citrate transporter)    | NM_177550 |       |       |  |       | 1.691 | 0.893 | Sodium ion transport.                                                                                                      |
| KRTAP9-3       | keratin associated protein 9.3                                     | NM_031962 |       |       |  |       | 1.69  | 0.554 |                                                                                                                            |
| FLJ14721       | hypothetical protein FLJ14721                                      | NM_032829 |       |       |  | 1.687 | 0.426 |       |                                                                                                                            |
| PRDM7          | PR-domain zinc finger protein 7 isoform A                          | AF274347  |       |       |  |       | 1.686 | 0.438 | Regulation of transcription, DNA-dependent.                                                                                |
| LOC134548      | hypothetical protein LOC134548                                     | NM_175873 |       |       |  | 1.686 | 0.927 |       |                                                                                                                            |
| GAS2L2         | growth arrest-specific 2 like 2                                    | NM_139285 |       |       |  |       | 1.686 | 0.431 |                                                                                                                            |
| CACNB2         | * calcium channel, voltage-dependent, beta 2 subunit isoform       | NM_000724 |       |       |  | 1.685 | 0.473 |       | Calcium ion transport. Neuromuscular junction development.                                                                 |
| N/A            | N/A                                                                | M19154    |       |       |  | 1.684 | 1.045 |       | Regulation of cell cycle. Cell proliferation. Cell growth.                                                                 |
| MGC52423       | hypothetical protein MGC52423                                      | NM_182517 |       |       |  |       | 1.684 | 0.358 |                                                                                                                            |
| SIAT10         | * alpha2,3-sialyltransferase VI*                                   | NM_006100 |       |       |  | 1.682 | 0.833 |       | Amino sugar metabolism. Protein amino acid glycosylation.                                                                  |
| N/A            | N/A                                                                | AK098288  |       |       |  | 1.682 | 1.336 |       |                                                                                                                            |

|               |                                                                |              |       |       |       |       |       |                                                                                                                           |
|---------------|----------------------------------------------------------------|--------------|-------|-------|-------|-------|-------|---------------------------------------------------------------------------------------------------------------------------|
| DLL1          | delta-like 1                                                   | NM_005618    | 1.682 | 0.601 |       |       |       | Embryonic development (sensu Mammalia), Cell fate determination, Cell communication, Notch signaling pathway.             |
| rab1c         | small GTP-binding protein                                      | U66822       |       |       |       | 1.681 | 0.7   |                                                                                                                           |
| N/A           | LD78 alpha beta                                                | D63785       |       |       |       | 1.681 | 0.614 | Calcium ion homeostasis, Exocytosis, Cell motility, Chemotaxis, Inflammatory response, Cytoskeleton organization.         |
| R3HDML        | R3H domain (binds single-stranded nucleic acids) containing-II | NM_178491    |       |       |       | 1.68  | 0.574 |                                                                                                                           |
| K5B           | keratin 5b                                                     | NM_173352    |       |       |       | 1.68  | 0.297 |                                                                                                                           |
| FLJ10884      | hypothetical protein FLJ10884                                  | NM_019079    |       |       |       | 1.679 | 0.379 |                                                                                                                           |
| DKFZp434O0527 | hypothetical protein DKFZp434O0527                             | NM_194302    |       |       |       | 1.678 | 0.356 |                                                                                                                           |
| C14orf78      | C14orf78 protein                                               | BC011859     |       |       |       | 1.678 | 0.673 |                                                                                                                           |
| HRC           | histidine-rich calcium-binding protein precursor               | NM_002152    |       |       |       | 1.677 | 0.376 | Electron transport, Muscle contraction.                                                                                   |
| N/A           | N/A                                                            | AK126065     | 1.676 | 0.855 |       |       |       |                                                                                                                           |
| KIAA1679      | KIAA1679 protein                                               | AB051466     | 1.674 | 0.985 |       |       |       |                                                                                                                           |
| DDIT4L        | DNA-damage-inducible transcript 4-like                         | NM_145244    | 1.674 | 1.059 |       |       |       |                                                                                                                           |
| N/A           | N/A                                                            | AK126276     | 1.673 | 0.849 |       |       |       |                                                                                                                           |
| N/A           | GIQT3049                                                       | AY359026     | 1.672 | 0.612 |       |       |       | Electron transport, Cholesterol biosynthesis.                                                                             |
| N/A           | N/A                                                            | AK093351     | 2.067 | 2.023 |       | 1.672 | 0.566 |                                                                                                                           |
| LY75          | lymphocyte antigen 75                                          | NM_002349    | 1.671 | 0.611 |       |       |       | Endocytosis, Inflammatory response.                                                                                       |
| CLGN          | calmegin                                                       | NM_004362    | 1.671 | 0.609 |       |       |       | Protein folding, Fertilization.                                                                                           |
| FSTL4         | folistatin-like 4                                              | NM_015082    |       |       |       | 1.669 | 0.873 |                                                                                                                           |
| N/A           | G protein-coupled receptor KIAA0758 protein                    | AY255552     |       |       |       | 1.666 | 0.701 |                                                                                                                           |
| N/A           | N/A                                                            | AK127825     |       |       |       | 1.665 | 0.773 | Protein amino acid phosphorylation, Signal transduction, Alcohol metabolism, Lipid metabolism.                            |
| N/A           | interleukin-1 homolog 2                                        | AF200494     |       |       |       | 1.664 | 0.463 | Immune response.                                                                                                          |
| N/A           | N/A                                                            | AK128517     | 1.663 | 0.477 |       |       |       |                                                                                                                           |
| MGC71745      | similar to embigin                                             | NM_198449    | 1.663 | 0.817 |       |       |       |                                                                                                                           |
| KIAA0976      | KIAA0976 protein                                               | AB023193     |       |       |       | 1.662 | 0.589 | Neurogenesis, Axonogenesis, Cell differentiation.                                                                         |
| C14orf147     | chromosome 14 open reading frame 147                           | NM_138288    |       |       | 1.662 | 0.333 |       |                                                                                                                           |
| ADAM28        | a disintegrin and metalloproteinase domain 28 isoform 1 prepr  | NM_014265    | 1.662 | 0.87  |       |       |       | Proteolysis and peptidolysis, Spermatogenesis.                                                                            |
| TRIM9         | tripartite motif protein 9 isoform 1                           | NM_015163    | 1.661 | 1.036 |       |       |       | Protein ubiquitination.                                                                                                   |
| FLJ90013      | hypothetical protein FLJ90013                                  | NM_153365    | 1.661 | 1.456 |       |       |       |                                                                                                                           |
| FLJ00054      | FLJ00054 protein                                               | AK054562     |       |       |       | 1.661 | 0.616 |                                                                                                                           |
| N/A           | PRO1257                                                        | AF116629     | 1.66  | 0.613 |       |       |       | Electron transport.                                                                                                       |
| CYP3A7        | cytochrome P450, family 3, subfamily A, polypeptide 7*         | NM_000765    |       |       |       | 1.66  | 0.404 | Electron transport, Xenobiotic metabolism.                                                                                |
| N/A           | N/A                                                            | AK126399     |       |       |       | 1.659 | 0.502 |                                                                                                                           |
| GP9           | glycoprotein IX (platelet)                                     | NM_000174    |       |       |       | 1.659 | 0.494 | Cell adhesion, Blood coagulation.                                                                                         |
| SYNE1         | nesprin 1 longest                                              | NM_182961    | 1.658 | 1.259 |       |       |       | Nuclear organization and biogenesis, Golgi organization and biogenesis, Muscle cell differentiation.                      |
| N/A           | N/A                                                            | AK022209     | 1.658 | 0.406 |       |       |       | Electron transport.                                                                                                       |
| N/A           | N/A                                                            | AK128039     | 1.657 | 0.388 |       |       |       |                                                                                                                           |
| UGT1A6        | * UDP glycosyltransferase 1 family, polypeptide A6 isoform 1 p | NM_001072    | 1.656 | 0.314 |       |       |       | Xenobiotic metabolism, Metabolism.                                                                                        |
| TAS2R40       | * taste receptor, type 2, member 40*                           | NM_176882    | 1.656 | 0.648 |       |       |       |                                                                                                                           |
| N/A           | N/A                                                            | AK124894     |       |       |       | 1.656 | 0.369 | Protein amino acid phosphorylation, Signal transduction, Alcohol metabolism, Lipid metabolism.                            |
| PLEKHB1       | pleckstrin homology domain containing, family B (evectins) me  | NM_021200    |       |       |       | 1.654 | 0.557 | Signal transduction, Phototransduction.                                                                                   |
| N/A           | N/A                                                            | X51602       | 1.654 | 0.506 |       |       |       | Angiogenesis, Transmembrane receptor protein tyrosine kinase signaling pathway, Pregnancy.                                |
| N/A           | N/A                                                            | AK098637     | 1.653 | 0.515 |       |       |       |                                                                                                                           |
| OR10AD1       | olfactory receptor, family 10, subfamily AD, member 1*         | NM_001004134 |       |       |       | 1.652 | 1.372 |                                                                                                                           |
| N/A           | N/A                                                            | AK128040     | 1.651 | 0.847 |       |       |       |                                                                                                                           |
| N/A           | N/A                                                            | AK127300     |       |       |       | 1.651 | 0.484 | Transport, Cation transport, Zinc ion transport.                                                                          |
| N/A           | N/A                                                            | AK026211     | 1.651 | 0.677 |       |       |       |                                                                                                                           |
| LOC285679     | LOC285679 protein                                              | BC043435     |       |       |       | 1.651 | 0.719 |                                                                                                                           |
| N/A           | Unknown (protein for IMAGE:5192302)                            | BC048278     | 1.65  | 0.609 |       |       |       |                                                                                                                           |
| SIAT9         | sialyltransferase 9 " GM3 synthase) (SIAT9), mRNA."            | NM_003896    | 1.649 | 1.254 |       |       |       | Ganglioside biosynthesis, Carbohydrate metabolism, Protein amino acid glycosylation.                                      |
| C9orf42       | chromosome 9 open reading frame 42                             | NM_138333    | 1.649 | 1.126 |       |       |       |                                                                                                                           |
| N/A           | Similar to hypothetical protein FLJ21394                       | BC013935     |       |       |       | 1.648 | 0.376 |                                                                                                                           |
| LSP1          | lymphocyte-specific protein 1                                  | NM_002339    |       |       |       | 1.648 | 0.422 | Cell motility, Cellular defense response, Signal transduction.                                                            |
| CD4           | CD4 receptor                                                   | S79267       |       |       |       | 1.648 | 0.606 | Immune response, Cell adhesion, Transmembrane receptor protein tyrosine kinase signaling pathway, T-cell differentiation. |
| C20orf166     | chromosome 20 open reading frame 166                           | NM_178463    |       |       |       | 1.648 | 0.798 |                                                                                                                           |
| ZNF19         | zinc finger protein 19                                         | NM_006961    |       |       |       | 1.647 | 0.742 | Regulation of transcription, DNA-dependent.                                                                               |
| SLCO5A1       | organic anion transporter polypeptide-related protein 4        | NM_030958    |       |       |       | 1.647 | 0.822 | Transport.                                                                                                                |

|               |                                                                    |              |       |       |  |       |       |                                                                                                                   |
|---------------|--------------------------------------------------------------------|--------------|-------|-------|--|-------|-------|-------------------------------------------------------------------------------------------------------------------|
| PEBP4         | hypothetical protein MGC22776                                      | NM_144962    |       |       |  | 1.647 | 0.372 |                                                                                                                   |
| N/A           | N/A                                                                | AK092741     |       |       |  | 1.647 | 0.766 | Cell proliferation. Antimicrobial humoral response.                                                               |
| PDGFR         | platelet-derived growth factor receptor-like protein               | NM_006207    | 1.646 | 0.896 |  |       |       |                                                                                                                   |
| C21orf37      | chromosome 21 open reading frame 37                                | NM_001005521 | 1.646 | 0.47  |  |       |       |                                                                                                                   |
| PRICKLE1      | prickle-like 1                                                     | NM_153026    | 1.645 | 0.637 |  |       |       |                                                                                                                   |
| N/A           | N/A                                                                | M28586       | 1.645 | 0.476 |  |       |       | Defense response. Cell-cell signaling. Response to virus.                                                         |
| N/A           | N/A                                                                | AK024389     | 1.645 | 0.724 |  |       |       |                                                                                                                   |
| ALPI          | intestinal alkaline phosphatase precursor                          | NM_001631    |       |       |  | 1.645 | 0.719 | Metabolism. Phosphorylation.                                                                                      |
| ZNF232        | zinc finger protein 232                                            | NM_014519    |       |       |  | 1.644 | 0.591 | Regulation of transcription, DNA-dependent.                                                                       |
| N/A           | Unknown (protein for IMAGE:2988019)                                | BC001521     | 1.644 | 0.739 |  |       |       |                                                                                                                   |
| FBN3          | fibrillin 3                                                        | NM_032447    |       |       |  | 1.643 | 0.822 |                                                                                                                   |
| WNT2          | wingless-type MMTV integration site family member 2 precursor      | NM_003391    | 1.642 | 0.46  |  |       |       | Frizzled-2 signaling pathway. Development.                                                                        |
| N/A           | N/A                                                                | AK091509     |       |       |  | 1.642 | 0.496 |                                                                                                                   |
| BCORL1        | BCL6 co-repressor-like 1                                           | NM_021946    | 1.641 | 0.811 |  |       |       |                                                                                                                   |
| tpcr16        | putative olfactory receptor                                        | X89670       |       |       |  | 1.638 | 0.899 |                                                                                                                   |
| PDK4          | * pyruvate dehydrogenase kinase, isoenzyme 4*                      | NM_002612    | 1.638 | 0.748 |  |       |       | Glucose metabolism. Protein amino acid phosphorylation.                                                           |
| MYT1          | MYT1                                                               | AB028973     |       |       |  | 1.638 | 0.397 | Protein modification.                                                                                             |
| CHRNA5        | * cholinergic receptor, nicotinic, alpha polypeptide 5*            | NM_000745    | 1.636 | 0.567 |  |       |       | Ion transport. Signal transduction. Synaptic transmission.                                                        |
| SLIC1         | selectin ligand interactor cytoplasmic-1                           | NM_153337    | 1.635 | 0.961 |  |       |       | Intracellular signaling cascade. Protein transport.                                                               |
| IGF2AS        | * insulin-like growth factor 2, antisense*                         | NM_016412    | 1.635 | 1.052 |  |       |       |                                                                                                                   |
| FLJ00143      | FLJ00143 protein                                                   | AK074072     | 1.635 | 0.342 |  |       |       | Intracellular signaling cascade.                                                                                  |
| APOA4         | apolipoprotein A-IV precursor                                      | NM_000482    |       |       |  | 1.635 | 0.679 | Lipid metabolism. Lipid transport. Lipid transport. Circulation.                                                  |
| N/A           | Unknown (protein for IMAGE:3866238)                                | BC008648     |       |       |  | 1.633 | 0.278 | Nucleosome assembly. Neurogenesis.                                                                                |
| MRGX2         | G protein-coupled receptor MRGX2                                   | NM_054030    |       |       |  | 1.633 | 0.593 |                                                                                                                   |
| PHOSPHO1      | * phosphatase, orphan 1*                                           | NM_178500    | 1.632 | 0.85  |  |       |       | Metabolism.                                                                                                       |
| N/A           | N/A                                                                | AK124895     | 1.632 | 0.793 |  |       |       |                                                                                                                   |
| FLJ42842      | FLJ42842 protein                                                   | NM_001004335 | 1.37  | 1.775 |  | 1.631 | 0.562 |                                                                                                                   |
| VLDLR         | very low density lipoprotein receptor                              | NM_003383    | 1.63  | 0.979 |  |       |       | Lipid metabolism. Lipid transport. Endocytosis. Signal transduction. Neurogenesis.                                |
| KRTHB2        | keratin, hair, basic, 2*                                           | NM_033033    |       |       |  | 1.63  | 0.443 |                                                                                                                   |
| IQGAP2        | IQ motif containing GTPase activating protein 2                    | NM_006633    | 1.63  | 0.797 |  |       |       | Signal transduction. Small GTPase mediated signal transduction.                                                   |
| HLA-C         | * major histocompatibility complex, class I, C precursor*          | NM_002117    | 1.627 | 0.749 |  |       |       |                                                                                                                   |
| DKFZp686A1395 | hypothetical protein                                               | BX537436     |       |       |  | 1.627 | 0.52  | Ion transport. Calcium ion transport.                                                                             |
| GAL3ST1       | galactose-3-O-sulfotransferase 1                                   | NM_004861    |       |       |  | 1.626 | 0.596 | N-linked glycosylation. Biosynthesis.                                                                             |
| ZCCHC13       | * zinc finger, CCHC domain containing 13*                          | NM_203303    | 1.621 | 0.272 |  |       |       |                                                                                                                   |
| N/A           | N/A                                                                | BX248746     | 1.621 | 0.792 |  |       |       |                                                                                                                   |
| DKFZp547E052  | DKFZp547E052 protein                                               | BC062636     | 1.621 | 1.066 |  |       |       |                                                                                                                   |
| PCBD          | pterin-4 alpha-carbinolamine dehydratase isoform 1 precursor       | NM_000281    |       |       |  | 1.62  | 0.997 | Tetrahydrobiopterin biosynthesis.                                                                                 |
| env           | HERV-E envelope glycoprotein                                       | AF026246     |       |       |  | 1.619 | 0.252 |                                                                                                                   |
| KRTAP9.5      | keratin associated protein 9.5                                     | AJ406949     |       |       |  | 1.617 | 0.774 |                                                                                                                   |
| GH2           | growth hormone 2 isoform 2                                         | NM_022557    |       |       |  | 1.617 | 0.59  |                                                                                                                   |
| N/A           | hunc18b2                                                           | AB002559     |       |       |  | 1.616 | 0.532 | Intracellular protein transport. Vesicle docking during exocytosis. Vesicle-mediated transport.                   |
| CSH2          | chorionic somatomammotropin hormone 2 isoform 2                    | NM_022644    |       |       |  | 1.616 | 0.362 | Signal transduction. Cell-cell signaling. Pregnancy.                                                              |
| N/A           | TAC3                                                               | AY358679     |       |       |  | 1.615 | 0.387 | Tachykinin signaling pathway. Neuropeptide signaling pathway. Synaptic transmission. Pregnancy.                   |
| DKFZp434P0111 | hypothetical protein                                               | AL157492     |       |       |  | 1.615 | 0.242 |                                                                                                                   |
| GSTA1         | glutathione S-transferase A1                                       | BC053578     |       |       |  | 1.612 | 0.642 | Metabolism.                                                                                                       |
| DKFZp667D092  | hypothetical protein cDNA DKFZp667D092 (from clone DKFZpl AL713683 |              | 1.612 | 0.791 |  |       |       |                                                                                                                   |
| N/A           | N/A                                                                | AK095342     |       |       |  | 1.608 | 0.639 | Epidermis development.                                                                                            |
| N/A           | N/A                                                                | AK126380     |       |       |  | 1.607 | 0.715 |                                                                                                                   |
| ATP1A3        | Na <sup>+</sup> /K <sup>+</sup> -ATPase alpha 3 subunit            | NM_152296    |       |       |  | 1.607 | 0.807 | Potassium ion transport. Sodium ion transport. Metabolism. ATP hydrolysis coupled.                                |
| YPEL5         | yippee-like 5                                                      | NM_016061    | 1.605 | 0.827 |  |       |       |                                                                                                                   |
| FLJ00240      | FLJ00240 protein                                                   | AK074167     |       |       |  | 1.605 | 0.402 |                                                                                                                   |
| KNG1          | kininogen 1                                                        | NM_000893    |       |       |  | 1.604 | 0.398 | Smooth muscle contraction. Inflammatory response. Negative regulation of cell adhesion. Blood coagulation.        |
| CATX-2        | unknown                                                            | AF083118     | 1.604 | 0.874 |  |       |       |                                                                                                                   |
| KIAA1045      | KIAA1045 protein                                                   | AB028968     | 1.603 | 1.214 |  |       |       |                                                                                                                   |
| GUCY2F        | guanylate cyclase 2F                                               | NM_001522    | 1.603 | 0.811 |  |       |       | Protein amino acid phosphorylation. Receptor guanylyl cyclase signaling pathway. Intracellular signaling cascade. |
| N/A           | alkaline phosphatase                                               | AB012642     |       |       |  | 1.602 | 0.445 | Metabolism. Phosphorylation.                                                                                      |

|              |                                                                      |              |       |       |       |       |                                                                                                                            |  |
|--------------|----------------------------------------------------------------------|--------------|-------|-------|-------|-------|----------------------------------------------------------------------------------------------------------------------------|--|
| N/A          | KSP37                                                                | AY358978     |       |       | 1.601 | 0.8   |                                                                                                                            |  |
| CD72         | CD72 antigen                                                         | NM_001782    |       |       | 1.601 | 0.651 | Cell adhesion. Antimicrobial humoral response.                                                                             |  |
| N/A          | N/A                                                                  | AK058066     | 1.6   | 0.725 |       |       |                                                                                                                            |  |
| CBFA2T3      | myeloid translocation gene-related protein 2 isoform MTG16a          | NM_005187    |       |       | 1.6   | 0.297 | Regulation of transcription, DNA-dependent. Cell proliferation.                                                            |  |
| N/A          | PRO1900                                                              | AF118081     |       |       | 1.599 | 0.566 | Protein amino acid phosphorylation. Signal transduction. Alcohol metabolism. Lipid metabolism.                             |  |
| C21orf125    | chromosome 21 open reading frame 125                                 | NM_194309    |       |       | 1.599 | 0.557 |                                                                                                                            |  |
| PLXDC2       | plexin domain containing 2 precursor                                 | NM_032812    | 1.598 | 0.911 |       |       | Development.                                                                                                               |  |
| HOOK1        | hook homolog 1                                                       | NM_015888    | 1.598 | 0.47  |       |       | Microtubule cytoskeleton organization and biogenesis. Spermatogenesis. Cell differentiation.                               |  |
| GRM2         | glutamate receptor, metabotropic 2 precursor*                        | NM_000839    |       |       | 1.598 | 0.584 | Signal transduction. Negative regulation of adenylate cyclase activity. Synaptic transmission.                             |  |
| SNCAIP       | synuclein alpha interacting protein                                  | NM_005460    | 1.597 | 1.153 |       |       |                                                                                                                            |  |
| FLJ45079     | FLJ45079 protein                                                     | NM_001001685 |       |       | 1.596 | 0.612 |                                                                                                                            |  |
| RRP22        | RRP22 protein                                                        | BC050739     |       |       | 1.594 | 0.941 | Small GTPase mediated signal transduction.                                                                                 |  |
| ATP2B2       | plasma membrane calcium ATPase 2 isoform a                           | NM_001001331 |       |       | 1.594 | 0.545 | Cation transport. Calcium ion transport. Metabolism.                                                                       |  |
| N/A          | N/A                                                                  | AK092699     | 1.593 | 0.731 |       |       |                                                                                                                            |  |
| KCNJ6        | potassium inwardly-rectifying channel J6                             | NM_002240    | 1.593 | 0.914 |       |       | Ion transport. Potassium ion transport.                                                                                    |  |
| TRIM4        | tripartite motif protein TRIM4 isoform alpha                         | NM_033017    |       |       | 1.592 | 0.217 | Protein ubiquitination.                                                                                                    |  |
| TRPM6        | * transient receptor potential cation channel, subfamily M, member 6 | NM_017862    | 1.591 | 0.413 |       |       | Protein amino acid phosphorylation. Cation transport. Calcium ion transport.                                               |  |
| ST18         | suppression of tumorigenicity 18                                     | NM_014882    |       |       | 1.591 | 0.676 | Regulation of transcription, DNA-dependent.                                                                                |  |
| SEC22L1      | vesicle trafficking protein sec22b                                   | NM_004892    | 1.591 | 0.428 |       |       | ER to Golgi transport. Protein transport. Vesicle-mediated transport.                                                      |  |
| N/A          | N/A                                                                  | AK090695     |       |       | 1.591 | 1.102 |                                                                                                                            |  |
| KCNQ2        | potassium voltage-gated channel KQT-like protein 2 isoform c         | NM_004518    |       |       | 1.591 | 0.746 | Cation transport. Potassium ion transport. Potassium ion transport. Synaptic transmission. Neurogenesis.                   |  |
| GHRH-R       | N/A                                                                  | S79912       |       |       | 1.591 | 0.618 |                                                                                                                            |  |
| EPHA3        | ephrin receptor EphA3 isoform a precursor                            | NM_005233    | 1.591 | 0.541 |       |       | Protein amino acid phosphorylation. Signal transduction. Transmembrane receptor protein tyrosine kinase signaling pathway. |  |
| OR51F2       | * olfactory receptor, family 51, subfamily F, member 2*              | NM_001004753 | 1.59  | 1.672 |       |       |                                                                                                                            |  |
| N/A          | N/A                                                                  | AK127341     |       |       | 1.59  | 0.93  | Protein amino acid phosphorylation. Signal transduction. Alcohol metabolism. Lipid metabolism.                             |  |
| PIWIL2       | piwi-like 2                                                          | NM_018068    | 1.589 | 0.937 |       |       |                                                                                                                            |  |
| KRTAP9-2     | keratin associated protein 9.2                                       | NM_031961    | 1.588 | 0.872 |       |       |                                                                                                                            |  |
| BCL2         | B-cell lymphoma protein 2 alpha isoform                              | NM_000633    | 1.588 | 0.353 |       |       | Regulation of cell cycle. Release of cytochrome c from mitochondria. Anti-apoptosis. Humoral immune response.              |  |
| FLJ21128     | hypothetical protein FLJ21128                                        | NM_025083    | 1.587 | 0.937 |       |       |                                                                                                                            |  |
| ASS          | argininosuccinate synthetase                                         | NM_054012    |       |       | 1.587 | 0.584 | Urea cycle. Arginine biosynthesis. Amino acid biosynthesis.                                                                |  |
| TRIP3        | thyroid hormone receptor interactor 3                                | NM_004773    | 1.586 | 0.926 |       |       | Regulation of transcription, DNA-dependent.                                                                                |  |
| GPR51        | G protein-coupled receptor 51                                        | NM_005458    |       |       | 1.584 | 0.444 |                                                                                                                            |  |
| SLC36A2      | * solute carrier family 36 (proton/amino acid symporter), member 2   | NM_181776    | 1.583 | 1.311 |       |       | Protein biosynthesis. Transport. Amino acid transport.                                                                     |  |
| ETV7         | Ets transcription factor TEL-2b                                      | NM_016135    | 1.582 | 0.475 |       |       | Transcription. Regulation of transcription, DNA-dependent. Transcription from RNA polymerase II promoter. Organogenesis.   |  |
| N/A          | N/A                                                                  | AK126199     |       |       | 1.58  | 0.46  |                                                                                                                            |  |
| LYG2         | lysozyme-like                                                        | NM_175735    | 1.58  | 1.16  |       |       |                                                                                                                            |  |
| N/A          | N/A                                                                  | AK091161     |       |       | 1.579 | 0.122 |                                                                                                                            |  |
| N/A          | Unknown (protein for IMAGE:4749202)                                  | BC033372     |       |       | 1.578 | 0.677 |                                                                                                                            |  |
| N/A          | N/A                                                                  | AK024943     |       |       | 1.578 | 0.327 | Intracellular signaling cascade. Sensory perception. Visual perception. Perception of sound.                               |  |
| MSP          | mosaic serine protease                                               | NM_032046    |       |       | 1.578 | 0.465 | Proteolysis and peptidolysis.                                                                                              |  |
| HRH3         | histamine receptor H3                                                | NM_007232    |       |       | 1.578 | 0.954 | Signal transduction. G-protein coupled receptor protein signaling pathway.                                                 |  |
| ZMYND10      | * zinc finger, MYND domain-containing 10*                            | NM_015896    | 1.577 | 0.3   |       |       |                                                                                                                            |  |
| N/A          | N/A                                                                  | AK123235     |       |       | 1.577 | 0.589 |                                                                                                                            |  |
| OR13H1       | * olfactory receptor, family 13, subfamily H, member 1*              | NM_001004486 | 1.576 | 0.905 |       |       |                                                                                                                            |  |
| N/A          | N/A                                                                  | AK093103     | 1.576 | 1.01  |       |       |                                                                                                                            |  |
| SCGB1A1      | * secretoglobulin, family 1A, member 1 (uteroglobin)*                | NM_003357    | 1.566 | 1.735 | 1.575 | 0.95  | Signal transduction. Embryo implantation. Organogenesis.                                                                   |  |
| KIAA1957     | KIAA1957 protein                                                     | AB075837     |       |       | 1.575 | 0.859 |                                                                                                                            |  |
| DKFZp761K058 | hypothetical protein                                                 | AL833940     |       |       | 1.575 | 0.465 |                                                                                                                            |  |
| CEACAM4      | carcinoembryonic antigen-related cell adhesion molecule 4            | NM_001817    |       |       | 1.575 | 0.794 |                                                                                                                            |  |
| MGC5391      | hypothetical protein MGC5391                                         | NM_032740    |       |       | 1.574 | 0.313 |                                                                                                                            |  |
| LOC404266    | LOC404266 protein                                                    | BC010732     | 1.574 | 0.689 |       |       |                                                                                                                            |  |
| KIAA1783     | KIAA1783 protein                                                     | AB058686     |       |       | 1.574 | 0.339 | ATP synthesis coupled proton transport.                                                                                    |  |
| N/A          | N/A                                                                  | AK124069     |       |       | 1.573 | 1.02  |                                                                                                                            |  |
| N/A          | N/A                                                                  | AK057762     | 1.573 | 0.588 |       |       |                                                                                                                            |  |
| LAIR1        | leukocyte-associated Ig-like receptor 1 isoform a precursor          | NM_002287    | 1.573 | 1.154 |       |       |                                                                                                                            |  |
| CHST11       | carbohydrate (chondroitin 4) sulfotransferase 11                     | NM_018413    | 1.573 | 0.64  |       |       | Carbohydrate metabolism. Chondroitin sulfate biosynthesis.                                                                 |  |

|               |                                                       |              |       |       |       |       |       |       |                                                                                                                      |  |
|---------------|-------------------------------------------------------|--------------|-------|-------|-------|-------|-------|-------|----------------------------------------------------------------------------------------------------------------------|--|
| SP6           | Sp6 transcription factor                              | NM_199262    | 1.572 | 0.856 |       |       |       |       |                                                                                                                      |  |
| FLJ00165      | FLJ00165 protein                                      | AK074094     |       |       |       |       | 1.571 | 0.382 | Positive regulation of cytokine production. Inflammatory response. Cell surface receptor linked signal transduction. |  |
| DPT           | dermatopontin precursor                               | NM_001937    | 1.571 | 0.708 |       |       |       |       | Cell adhesion.                                                                                                       |  |
| N/A           | N/A                                                   | AK097513     |       |       |       |       | 1.57  | 0.831 | Protein amino acid phosphorylation. Signal transduction. Alcohol metabolism. Lipid metabolism.                       |  |
| GLRA2         | * glycine receptor, alpha 2"                          | NM_002063    | 1.57  | 0.884 |       |       |       |       | Ion transport. Chloride transport. Cell surface receptor linked signal transduction. Synaptic transmission.          |  |
| GABRR1        | gamma-aminobutyric acid (GABA) receptor, rho 1"       | NM_002042    |       |       |       |       | 1.57  | 0.639 | Ion transport. Gamma-aminobutyric acid signaling pathway. Synaptic transmission.                                     |  |
| HSD17B12      | steroid dehydrogenase homolog                         | NM_016142    | 1.569 | 0.491 |       |       |       |       | Metabolism.                                                                                                          |  |
| FLJ32955      | hypothetical protein FLJ32955                         | NM_153041    |       |       |       | 1.569 | 1.003 |       |                                                                                                                      |  |
| N/A           | seminal plasma protein-like protein                   | AF279147     | 1.568 | 0.941 |       |       |       |       |                                                                                                                      |  |
| LOC129285     | smooth muscle myosin heavy chain 11 isoform SM1-like  | NM_152994    | 1.567 | 0.877 |       |       |       |       |                                                                                                                      |  |
| KIAA1622      | HEAT-like repeat-containing protein isoform 1         | NM_058237    | 1.567 | 1.001 |       |       |       |       |                                                                                                                      |  |
| CX3CL1        | chemokine (C-X3-C motif) ligand 1                     | NM_002996    |       |       |       |       | 1.567 | 0.428 | Immune response. Cell adhesion. Cytokine and chemokine mediated signaling pathway. Immune cell chemotaxis.           |  |
| ATP2B3        | plasma membrane calcium ATPase 3 isoform 3a           | NM_021949    |       |       |       |       | 1.567 | 0.787 | Cation transport. Calcium ion transport. Metabolism.                                                                 |  |
| SCGB1D2       | lipophilin B                                          | NM_006551    |       |       |       |       | 1.566 | 0.563 |                                                                                                                      |  |
| PIK4CB        | PIK4CB protein                                        | BC040300     | 1.566 | 0.601 |       |       |       |       | Phosphatidylinositol biosynthesis. Receptor mediated endocytosis. Signal transduction.                               |  |
| OR2B11        | olfactory receptor, family 2, subfamily B, member 11" | NM_001004492 |       |       |       |       | 1.566 | 0.593 |                                                                                                                      |  |
| N/A           | N/A                                                   | AK130379     |       |       |       |       | 1.566 | 0.331 |                                                                                                                      |  |
| N/A           | N/A                                                   | AK095136     |       |       |       |       | 1.566 | 0.935 | Small GTPase mediated signal transduction.                                                                           |  |
| TRALPUSH      | TRALPUSH                                              | NM_053002    | 1.565 | 0.564 |       |       |       |       |                                                                                                                      |  |
| N/A           | N/A                                                   | K00830       |       |       |       |       | 1.565 | 0.545 |                                                                                                                      |  |
| N/A           | N/A                                                   | AK022399     | 1.565 | 0.965 |       |       |       |       | Protein biosynthesis. Translational initiation. Biosynthesis. Response to virus.                                     |  |
| KIAA1573      | KIAA1573 protein                                      | NM_020925    | 1.565 | 0.579 |       |       |       |       | Ion transport. Calcium ion transport.                                                                                |  |
| N/A           | N/A                                                   | K00830       |       |       |       |       | 1.564 | 0.518 |                                                                                                                      |  |
| CACNG1        | voltage-dependent calcium channel gamma-1 subunit     | NM_000727    |       |       |       |       | 1.564 | 0.857 | Ion transport. Calcium ion transport. Muscle contraction.                                                            |  |
| FLJ45651      | FLJ45651 protein                                      | NM_198442    |       |       |       |       | 1.563 | 0.511 |                                                                                                                      |  |
| ATP7B         | * ATPase, Cu++ transporting, beta polypeptide"        | NM_000053    | 1.563 | 0.811 |       |       |       |       | Copper ion transport. Copper ion transport. Metabolism. Metal ion transport.                                         |  |
| PKLR          | pyruvate kinase, liver and RBC isoform 1"             | NM_000298    |       |       |       |       | 1.562 | 0.542 | Glycolysis.                                                                                                          |  |
| PRES          | prestin isoform a                                     | NM_198999    | 1.561 | 0.531 |       |       |       |       |                                                                                                                      |  |
| DKFZp667F0711 | hypothetical protein                                  | AL713753     |       |       |       |       | 1.561 | 0.288 |                                                                                                                      |  |
| NKX3-1        | * NK3 transcription factor related, locus 1"          | NM_006167    | 1.56  | 0.587 |       |       |       |       | Regulation of transcription, DNA-dependent. Development.                                                             |  |
| N/A           | N/A                                                   | AK126772     | 1.56  | 1.056 |       |       |       |       |                                                                                                                      |  |
| TRY1          | trypsin X3                                            | NM_001001317 |       |       |       | 1.559 | 0.273 |       | Proteolysis and peptidolysis.                                                                                        |  |
| S100A7        | S100 calcium-binding protein A7                       | NM_002963    |       |       |       |       | 1.559 | 1.027 | Epidermis development.                                                                                               |  |
| MGC16186      | hypothetical protein MGC16186                         | NM_032372    |       |       |       |       | 1.559 | 0.64  |                                                                                                                      |  |
| CPT1C         | CPT1C protein                                         | BC029104     | 1.559 | 1.118 |       |       |       |       | Lipid metabolism. Fatty acid metabolism.                                                                             |  |
| OR6V1         | olfactory receptor, family 6, subfamily V, member 1"  | NM_001001667 |       |       |       |       | 1.558 | 0.321 |                                                                                                                      |  |
| N/A           | Unknown (protein for MGC:45823)                       | BC033184     |       |       |       |       | 1.558 | 0.475 |                                                                                                                      |  |
| DEFB107       | beta-defensin 107                                     | AF540979     | 1.024 | 0.504 | 1.558 | 0.75  |       |       |                                                                                                                      |  |
| N/A           | L-alanine:glyoxylate aminotransferase                 | S71388       |       |       |       |       | 1.557 | 0.233 |                                                                                                                      |  |
| SCGB2A1       | secretoglobulin, family 2A, member 1"                 | NM_002407    |       |       |       |       | 1.556 | 0.84  |                                                                                                                      |  |
| LOC130576     | hypothetical protein LOC130576                        | NM_177964    |       |       |       |       | 1.556 | 0.545 |                                                                                                                      |  |
| IFP38         | IFP38                                                 | NM_031943    |       |       |       |       | 1.556 | 0.64  |                                                                                                                      |  |
| PGR           | progesterone receptor                                 | NM_000926    |       |       |       |       | 1.554 | 0.54  |                                                                                                                      |  |
| N/A           | interleukin-1 receptor-associated kinase              | L76191       | 1.554 | 1.094 |       |       |       |       | Protein amino acid phosphorylation. Signal transduction. Alcohol metabolism. Lipid metabolism.                       |  |
| N/A           | N/A                                                   | AK128205     | 1.554 | 0.51  |       |       |       |       |                                                                                                                      |  |
| CREB5         | cAMP responsive element binding protein 5             | NM_182898    | 1.554 | 0.987 |       |       |       |       | Positive regulation of transcription.                                                                                |  |
| prepro-NPW    | prepro-Neuropeptide W polypeptide                     | AB084276     |       |       |       |       | 1.553 | 0.443 | Neuropeptide signaling pathway.                                                                                      |  |
| PRDM5         | PR domain containing 5                                | NM_018699    | 1.552 | 0.591 |       |       |       |       | Regulation of transcription, DNA-dependent                                                                           |  |
| N/A           | N/A                                                   | AK127243     |       |       |       |       | 1.551 | 0.238 |                                                                                                                      |  |
| MUC5AC        | MUC5AC protein                                        | AJ001402     |       |       |       |       | 1.551 | 0.347 | Cell adhesion.                                                                                                       |  |
| N/A           | Unknown (protein for IMAGE:5268331)                   | BC036665     |       |       |       |       | 1.549 | 0.644 |                                                                                                                      |  |
| EGLN3         | egl nine homolog 3                                    | NM_022073    | 1.549 | 0.623 |       |       |       |       | Apoptosis. Protein metabolism.                                                                                       |  |
| ART5          | ADP-ribosyltransferase 5 precursor                    | NM_053017    | 1.548 | 0.881 |       |       |       |       |                                                                                                                      |  |
| TRAR1         | trace amine receptor 1                                | NM_138327    | 1.012 | 1.134 | 1.547 | 1.188 |       |       |                                                                                                                      |  |
| SAA1          | serum amyloid A1 isoform 1                            | NM_000331    |       |       |       |       | 1.547 | 0.45  | Acute-phase response.                                                                                                |  |
| NALP11        | * NACHT, leucine rich repeat and PYD containing 11"   | NM_145007    | 1.547 | 0.753 |       |       |       |       |                                                                                                                      |  |

|               |                                                                |                                                |       |       |       |       |       |       |                                                                                                                     |  |
|---------------|----------------------------------------------------------------|------------------------------------------------|-------|-------|-------|-------|-------|-------|---------------------------------------------------------------------------------------------------------------------|--|
| DKFZp564F1062 | hypothetical protein                                           | cDNA DKFZp564F1062 (from clone DKFZ AL1173790) |       |       | 1.547 | 1.126 |       |       |                                                                                                                     |  |
| ORM2          | orosomucoid 2                                                  | NM_000608                                      |       |       |       |       | 1.545 | 0.513 | Transport. Acute-phase response.                                                                                    |  |
| N/A           | Unknown (protein for IMAGE:4778855)                            | BC031359                                       |       |       | 1.545 | 0.419 |       |       |                                                                                                                     |  |
| N/A           | N/A                                                            | AK091818                                       |       |       | 1.545 | 1.108 |       |       | Protein amino acid phosphorylation. Signal transduction. Alcohol metabolism. Lipid metabolism.                      |  |
| TAS2R7        | * taste receptor, type 2, member 7"                            | NM_023919                                      |       |       | 1.543 | 0.456 |       |       | Signal transduction. G-protein coupled receptor protein signaling pathway. Sensory perception. Perception of taste. |  |
| ITM2C         | integral membrane protein 3                                    | NM_030926                                      |       |       | 1.543 | 0.826 |       |       |                                                                                                                     |  |
| FLT4          | fms-related tyrosine kinase 4 isoform 1                        | NM_182925                                      |       |       | 1.543 | 0.851 |       |       | Protein amino acid phosphorylation. Transmembrane receptor protein tyrosine kinase signaling pathway.               |  |
| DKFZp586O1922 | hypothetical protein                                           | cDNA DKFZp586O1922 (from clone DKFZ AL117471)  |       |       | 1.542 | 0.66  |       |       |                                                                                                                     |  |
| IL16          | interleukin 16 isoform 2                                       | NM_172217                                      |       |       | 1.541 | 1.149 |       |       | Chemotaxis. Immune response. Sensory perception.                                                                    |  |
| HOMER1        | homer 1                                                        | NM_004272                                      |       |       | 1.541 | 1.208 |       |       | Metabotropic glutamate receptor, phospholipase C activating pathway. Synaptic transmission.                         |  |
| N/A           | HSPC062                                                        | AF161547                                       | 1.07  | 0.701 | 1.539 | 1.108 |       |       |                                                                                                                     |  |
| N/A           | PRO2369                                                        | AF119879                                       |       |       | 1.539 | 1.201 |       |       | Protein amino acid phosphorylation. Signal transduction. Alcohol metabolism. Lipid metabolism.                      |  |
| TMEM35        | transmembrane protein 35                                       | NM_021637                                      |       |       | 1.538 | 0.569 |       |       |                                                                                                                     |  |
| PAK3          | p21-activated kinase 3                                         | NM_002578                                      |       |       | 1.538 | 0.585 |       |       | Protein amino acid phosphorylation.                                                                                 |  |
| NIFIE         | seven transmembrane domain protein                             | Y18007                                         |       |       | 1.538 | 0.607 |       |       |                                                                                                                     |  |
| N/A           | N/A                                                            | AK128158                                       |       |       |       |       | 1.538 | 0.744 |                                                                                                                     |  |
| XB            | tenascin-X                                                     | Y17868                                         |       |       |       |       | 1.537 | 0.322 |                                                                                                                     |  |
| N/A           | N/A                                                            | BC043414                                       |       |       |       |       | 1.536 | 0.771 |                                                                                                                     |  |
| MRPS16        | mitochondrial ribosomal protein S16                            | NM_016065                                      |       |       | 1.536 | 1.016 |       |       | Protein biosynthesis.                                                                                               |  |
| SC5DL         | SC5DL protein                                                  | BC012333                                       |       |       | 1.535 | 1.102 |       |       | Lipid metabolism. Sterol biosynthesis.                                                                              |  |
| MHC2TA        | MHC class II transactivator                                    | NM_000246                                      |       |       |       |       | 1.534 | 0.44  | Regulation of transcription, DNA-dependent. Immune response. Detection of pest. pathogen or parasite.               |  |
| N/A           | N/A                                                            | AK125965                                       |       |       |       |       | 1.533 | 0.351 |                                                                                                                     |  |
| FLJ25818      | hypothetical protein                                           | FLJ25818                                       | 1.259 | 1.37  | 1.533 | 0.588 |       |       |                                                                                                                     |  |
| PCDHY         | protocadherin                                                  | AJ564971                                       |       |       | 1.532 | 0.765 |       |       | Cell adhesion. Homophilic cell adhesion.                                                                            |  |
| RORA          | RAR-related orphan receptor A isoform b                        | NM_134260                                      |       |       | 1.531 | 0.37  |       |       | Transcription. Regulation of transcription, DNA-dependent. Signal transduction.                                     |  |
| IFIT3         | IFIT3 protein                                                  | BC001383                                       |       |       | 1.531 | 0.681 |       |       | Immune response.                                                                                                    |  |
| N/A           | Unknown (protein for IMAGE:3354783)                            | BC009522                                       | 1.031 | 1.336 | 1.53  | 0.691 |       |       | Protein amino acid phosphorylation. Signal transduction. Alcohol metabolism. Lipid metabolism.                      |  |
| N/A           | N/A                                                            | AK125852                                       |       |       |       |       | 1.53  | 0.667 |                                                                                                                     |  |
| N/A           | hypothetical protein                                           | AF428259                                       |       |       |       |       | 1.53  | 0.388 |                                                                                                                     |  |
| TNXB          | tenascin XB isoform 1                                          | NM_019105                                      |       |       |       |       | 1.529 | 0.687 | Cell-matrix adhesion.                                                                                               |  |
| OR7C1         | * olfactory receptor, family 7, subfamily C, member 1"         | NM_198944                                      |       |       | 1.527 | 0.505 |       |       |                                                                                                                     |  |
| N/A           | INM04                                                          | AY194294                                       |       |       | 1.527 | 0.586 |       |       |                                                                                                                     |  |
| MX1           | myxovirus resistance protein 1                                 | NM_002462                                      |       |       | 1.527 | 0.265 |       |       | Induction of apoptosis. Immune response. Signal transduction.                                                       |  |
| FCN2          | ficolin 2 isoform d precursor                                  | NM_015839                                      |       |       |       |       | 1.527 | 0.372 |                                                                                                                     |  |
| PEX5L         | PXR2b protein                                                  | NM_016559                                      |       |       | 1.526 | 0.899 |       |       |                                                                                                                     |  |
| MGC35154      | hypothetical protein                                           | MGC35154                                       |       |       |       |       | 1.526 | 0.659 |                                                                                                                     |  |
| ROR1          | receptor tyrosine kinase-like orphan receptor 1                | NM_005012                                      |       |       | 1.524 | 0.891 |       |       | Protein amino acid phosphorylation. Transmembrane receptor protein tyrosine kinase signaling pathway. Development.  |  |
| N/A           | N/A                                                            | AK023750                                       |       |       |       |       | 1.524 | 0.498 |                                                                                                                     |  |
| KIAA0207      | N/A                                                            | D86962                                         |       |       | 1.524 | 1.02  |       |       | Intracellular signaling cascade. Cell-cell signaling. Insulin receptor signaling pathway.                           |  |
| TSLL1         | TSLL1-like 1                                                   | AF363367                                       |       |       |       |       | 1.523 | 0.691 |                                                                                                                     |  |
| MGC62094      | similar to PAGE-5 protein                                      | NM_207339                                      |       |       | 1.522 | 0.758 |       |       |                                                                                                                     |  |
| LOC152195     | hypothetical protein                                           | LOC152195                                      |       |       | 1.522 | 0.962 |       |       |                                                                                                                     |  |
| SLC5A12       | * solute carrier family 5 (sodium/glucose cotransporter), memt | NM_178498                                      |       |       | 1.52  | 0.852 |       |       | Transport.                                                                                                          |  |
| LOC285192     | LOC285192 protein                                              | BC041460                                       |       |       |       |       | 1.52  | 0.496 |                                                                                                                     |  |
| FLJ22662      | hypothetical protein                                           | FLJ22662                                       | 2.294 | 1.29  |       |       | 1.52  | 0.891 |                                                                                                                     |  |
| CTLA4         | cytotoxic T-lymphocyte-associated protein 4                    | NM_005214                                      |       |       |       |       | 1.52  | 0.896 | Immune response. Immune response.                                                                                   |  |
| TLR1          | toll-like receptor 1                                           | NM_003263                                      |       |       | 1.519 | 1.062 |       |       | Inflammatory response. Signal transduction. Activation of NF-kappaB-inducing kinase. Macrophage activation.         |  |
| N/A           | N/A                                                            | AK128367                                       |       |       | 1.519 | 0.516 |       |       | Protein amino acid phosphorylation. Signal transduction. Alcohol metabolism. Lipid metabolism.                      |  |
| N/A           | N/A                                                            | AK096051                                       |       |       |       |       | 1.519 | 0.328 | Protein amino acid phosphorylation. Signal transduction. Alcohol metabolism. Lipid metabolism.                      |  |
| EPB41L4B      | erythrocyte membrane protein band 4.1 like 4B                  | NM_019114                                      |       |       | 1.519 | 1.16  |       |       |                                                                                                                     |  |
| UNQ9366       | GPAD9366                                                       | NM_198444                                      |       |       |       |       | 1.518 | 0.835 |                                                                                                                     |  |
| KIAA0599      | KIAA0599 protein                                               | AB011171                                       |       |       | 1.518 | 0.705 |       |       |                                                                                                                     |  |
| BJ-TSA-9      | hypothetical protein                                           | MGC14128 isoform a                             | 3.114 | 1.486 |       |       | 1.518 | 0.657 |                                                                                                                     |  |
| TDRKH         | tudor and KH domain-containing protein                         | AF227192                                       |       |       | 1.517 | 0.693 |       |       |                                                                                                                     |  |
| RNF128        | ring finger protein 128 isoform 1                              | NM_194463                                      |       |       | 1.517 | 0.759 |       |       | Proteolysis and peptidolysis. Apoptosis. Protein ubiquitination.                                                    |  |
| N/A           | N/A                                                            | cDNA DKFZp451P074 (from clone DKFZp451P074).   |       |       | 1.517 | 1.27  |       |       |                                                                                                                     |  |

|              |                                                                   |              |       |       |       |       |  |       |       |                                                                                                                          |
|--------------|-------------------------------------------------------------------|--------------|-------|-------|-------|-------|--|-------|-------|--------------------------------------------------------------------------------------------------------------------------|
| N/A          | N/A                                                               | AK130385     |       |       |       |       |  | 1.517 | 0.199 |                                                                                                                          |
| APLP1        | amyloid beta (A4) precursor-like protein 1                        | NM_005166    |       |       |       |       |  | 1.517 | 0.651 | Endocytosis. Apoptosis. Cell adhesion. Neurogenesis.                                                                     |
| NEFH         | neurofilament heavy subunit                                       | S66488       |       |       |       |       |  | 1.515 | 0.422 |                                                                                                                          |
| CYP11B2      | cytochrome P450, subfamily XIB polypeptide 2 precursor*           | NM_000498    |       |       |       |       |  | 1.515 | 0.645 | Electron transport. Lipid metabolism. C21-steroid hormone biosynthesis. Glucocorticoid biosynthesis.                     |
| ZHX2         | zinc fingers and homeoboxes 2                                     | NM_014943    | 1.514 | 0.516 |       |       |  |       |       | Negative regulation of transcription, DNA-dependent.                                                                     |
| SCRT2        | scratch 2 protein                                                 | NM_033129    |       |       |       |       |  | 1.512 | 0.421 |                                                                                                                          |
| SYT9         | synaptotagmin IX                                                  | NM_175733    |       |       |       |       |  | 1.511 | 0.799 | Transport.                                                                                                               |
| PGDS         | prostaglandin-D synthase                                          | BC020734     | 1.511 | 0.724 |       |       |  |       |       | Prostaglandin biosynthesis. Fatty acid biosynthesis. Signal transduction. Cell-cell signaling. Locomotory behavior.      |
| OR2W5        | * olfactory receptor, family 2, subfamily W, member 5*            | NM_001004698 | 1.511 | 0.972 |       |       |  |       |       |                                                                                                                          |
| LOC127540    | HMG2 like                                                         | NM_145205    | 1.511 | 1.076 |       |       |  |       |       | Regulation of transcription, DNA-dependent.                                                                              |
| GPX5         | glutathione peroxidase 5 precursor, isoform 1*                    | NM_001509    |       |       |       |       |  | 1.511 | 0.856 | Lipid metabolism. Response to oxidative stress.                                                                          |
| N/A          | N/A                                                               | AK128062     |       |       |       |       |  | 1.51  | 0.817 |                                                                                                                          |
| N/A          | N/A                                                               | AK125726     |       |       |       |       |  | 1.51  | 0.282 |                                                                                                                          |
| KRT15        | keratin 15                                                        | NM_002275    | 1.51  | 0.964 |       |       |  |       |       | Epidermis development.                                                                                                   |
| KLRG1        | * killer cell lectin-like receptor subfamily G, member 1*         | NM_005810    | 1.509 | 0.562 |       |       |  |       |       | Inflammatory response. Cellular defense response. Cell surface receptor linked signal transduction.                      |
| N/A          | N/A                                                               | AK124155     | 1.508 | 1.45  |       |       |  |       |       |                                                                                                                          |
| N/A          | N/A                                                               | AK123197     |       |       | 1.508 | 0.442 |  |       |       |                                                                                                                          |
| N/A          | N/A                                                               | AK125470     | 1.506 | 0.555 |       |       |  |       |       |                                                                                                                          |
| FABP5        | fatty acid binding protein 5 (psoriasis-associated)               | BC019385     | 1.506 | 0.432 |       |       |  |       |       | Lipid metabolism. Transport. Epidermis development.                                                                      |
| DLNB27       | N/A                                                               | AB094096     |       |       |       |       |  | 1.506 | 0.625 | Ion transport. Water transport. Receptor guanylyl cyclase signaling pathway. Response to toxin. CGMP-mediated signaling. |
| AIF1         | allograft inflammatory factor 1 isoform 2                         | NM_004847    |       |       |       |       |  | 1.506 | 0.632 | Response to stress. Inflammatory response. Cell cycle arrest. Negative regulation of cell proliferation.                 |
| N/A          | Unknown (protein for MGC:71934)                                   | BC062217     | 1.505 | 0.784 |       |       |  |       |       |                                                                                                                          |
| ADAMTS9      | a disintegrin and metalloproteinase with thrombospondin motif     | NM_182920    | 1.505 | 0.789 |       |       |  |       |       | Glycoprotein catabolism. Development.                                                                                    |
| N/A          | N/A                                                               | AK124971     | 1.504 | 0.365 |       |       |  |       |       |                                                                                                                          |
| DKFZp547K152 | hypothetical proteincDNA DKFZp547K152 (from clone DKFZp: AL834238 |              | 1.504 | 0.85  |       |       |  |       |       |                                                                                                                          |
| N/A          | N/A                                                               | AK055963     | 1.503 | 0.635 |       |       |  |       |       |                                                                                                                          |
| TLH6         | alanine-glyoxylate aminotransferase homolog                       | AF191687     |       |       |       |       |  | 1.502 | 0.375 | Metabolism.                                                                                                              |
| OLFML1       | olfactomedin-like 1                                               | NM_198474    |       |       |       |       |  | 1.502 | 0.458 |                                                                                                                          |
| CNN3         | calponin 3                                                        | NM_001839    | 1.502 | 0.785 |       |       |  |       |       | Smooth muscle contraction.                                                                                               |
| LOC340529    | LOC340529 protein                                                 | BC041956     |       |       |       |       |  | 1.5   | 0.967 |                                                                                                                          |
| SDR-O        | orphan short-chain dehydrogenase / reductase                      | NM_148897    |       |       |       |       |  | 1.499 | 0.641 |                                                                                                                          |
| OPN1LW       | opsin 1 (cone pigments), long-wave-sensitive (color blindness,    | NM_020061    |       |       |       |       |  | 1.499 | 0.599 | Signal transduction. G-protein coupled receptor protein signaling pathway. Sensory perception. Visual perception.        |
| N/A          | zinc finger protein                                               | AF024701     |       |       | 1.499 | 0.544 |  |       |       |                                                                                                                          |
| GPR158L1     | GPR158-like 1                                                     | NM_001004334 |       |       |       |       |  | 1.499 | 0.483 |                                                                                                                          |
| FLJ23703     | hypothetical protein FLJ23703                                     | NM_182534    | 1.018 | 1.035 | 1.499 | 1.095 |  |       |       |                                                                                                                          |
| N/A          | acidic mammalian chitinase precursor                              | AF290004     | 1.497 | 0.843 |       |       |  |       |       | Polysaccharide catabolism. Response to acid. Carbohydrate metabolism. Cell wall chitin metabolism.                       |
| SLC16A8      | solute carrier family 16, member 8*                               | NM_013356    |       |       |       |       |  | 1.496 | 0.367 | Transport. Organic anion transport. Lactate transport.                                                                   |
| OR2C1        | olfactory receptor, family 2, subfamily C, member 1*              | NM_012368    |       |       |       |       |  | 1.496 | 0.969 | Signal transduction. G-protein coupled receptor protein signaling pathway. Perception of smell.                          |
| N/A          | N/A                                                               | BC013816     | 1.496 | 0.215 |       |       |  |       |       |                                                                                                                          |
| KHDRBS3      | * KH domain containing, RNA binding, signal transduction ass      | NM_006558    | 1.496 | 0.435 |       |       |  |       |       | Spermatogenesis.                                                                                                         |
| N/A          | N/A                                                               | AK126619     | 1.495 | 0.928 |       |       |  |       |       |                                                                                                                          |
| N/A          | N/A                                                               | AK125828     |       |       | 1.495 | 0.548 |  |       |       |                                                                                                                          |
| N/A          | ACAH3104                                                          | AY358109     |       |       | 1.493 | 0.884 |  |       |       |                                                                                                                          |
| N/A          | N/A                                                               | AL137353     |       |       | 1.493 | 0.81  |  |       |       |                                                                                                                          |
| N/A          | HOM-TES-85 tumor antigen                                          | AF124430     | 1.493 | 0.986 |       |       |  |       |       |                                                                                                                          |
| KCNA3        | potassium voltage-gated channel, shaker-related subfamily, m      | NM_002232    |       |       |       |       |  | 1.493 | 0.933 | Cation transport. Potassium ion transport.                                                                               |
| ASB10        | ankyrin repeat and SOCS box-containing protein 10                 | NM_080871    |       |       |       |       |  | 1.493 | 0.468 |                                                                                                                          |
| GR6          | putative GR6 protein                                              | NM_007354    |       |       |       |       |  | 1.492 | 0.544 |                                                                                                                          |
| GH1          | growth hormone 1 isoform 1                                        | NM_000515    |       |       |       |       |  | 1.492 | 0.697 | Signal transduction.                                                                                                     |
| FLJ30726     | hypothetical protein FLJ30726                                     | NM_153018    |       |       |       |       |  | 1.492 | 0.231 |                                                                                                                          |
| N/A          | N/A                                                               | AK130931     | 1.49  | 0.769 |       |       |  |       |       |                                                                                                                          |
| FLJ11017     | hypothetical protein FLJ11017                                     | NM_018302    | 1.488 | 0.586 |       |       |  |       |       |                                                                                                                          |
| DFNB31       | CASK-interacting protein CIP98                                    | NM_015404    | 1.488 | 0.809 |       |       |  |       |       | Perception of sound.                                                                                                     |
| CYP3A4       | cytochrome P450, subfamily IIIA, polypeptide 4*                   | NM_017460    |       |       |       |       |  | 1.488 | 0.495 | Electron transport. Lipid metabolism. Xenobiotic metabolism. Xenobiotic metabolism.                                      |
| N/A          | N/A                                                               | AK123276     |       |       | 1.487 | 0.346 |  |       |       | Protein amino acid phosphorylation. Signal transduction. Alcohol metabolism. Lipid metabolism. Metabolism.               |
| GIF          | gastric intrinsic factor (vitamin B synthesis)                    | NM_005142    |       |       | 1.487 | 0.693 |  |       |       | Ion transport. Cobalt ion transport.                                                                                     |



|                |                                                                   |              |       |       |       |       |       |       |       |       |                                                                                                                                |
|----------------|-------------------------------------------------------------------|--------------|-------|-------|-------|-------|-------|-------|-------|-------|--------------------------------------------------------------------------------------------------------------------------------|
| CXorf36        | chromosome X open reading frame 36                                | NM_024689    |       |       |       |       |       |       | 1.487 | 0.57  |                                                                                                                                |
| GPR123         | G protein-coupled receptor 123                                    | NM_032422    |       |       |       |       |       |       | 1.486 | 0.623 | Signal transduction. G-protein coupled receptor protein signaling pathway.                                                     |
| GALR3          | galanin receptor 3                                                | NM_003614    |       |       |       |       |       |       | 1.485 | 0.482 | Signal transduction. Negative regulation of adenylate cyclase activity. Neuropeptide signaling pathway. Synaptic transmission. |
| CD207          | CD207 antigen, langerin*                                          | NM_015717    |       |       |       |       |       |       | 1.485 | 0.421 |                                                                                                                                |
| N/A            | N/A                                                               | AK097864     |       |       |       |       |       |       | 1.484 | 0.387 | Apoptosis. Inflammatory response. Leukocyte cell adhesion. Cell-matrix adhesion. Integrin-mediated signaling pathway.          |
| GDAP1L1        | ganglioside-induced differentiation-associated protein 1-like 1   | NM_024034    |       |       |       |       |       |       | 1.484 | 0.452 |                                                                                                                                |
| C20orf17       | chromosome 20 open reading frame 17                               | NM_173485    |       |       |       |       |       |       | 1.484 | 0.457 | Regulation of transcription, DNA-dependent.                                                                                    |
| SLC2A7         | intestinal facilitative glucose transporter 7                     | NM_207420    |       |       | 1.483 | 0.408 |       |       |       |       |                                                                                                                                |
| IGFBP5         | IGFBP5 protein                                                    | BC008099     |       |       | 1.483 | 1.413 |       |       |       |       | Regulation of cell growth. Signal transduction.                                                                                |
| DKFZp686D09174 | hypothetical proteincDNA DKFZp686D09174 (from clone DKFZ BX641097 |              |       |       | 1.483 | 0.855 |       |       |       |       | Protein amino acid phosphorylation. Signal transduction. Alcohol metabolism. Lipid metabolism.                                 |
| CHST6          | carbohydrate (N-acetylglucosamine 6-O) sulfotransferase 6         | NM_021615    |       |       | 1.483 | 0.611 |       |       |       |       |                                                                                                                                |
| CCNJ           | cyclin J                                                          | NM_019084    | 1.061 | 1.289 | 1.483 | 1.565 |       |       |       |       | Regulation of cell cycle.                                                                                                      |
| FLJ39553       | hypothetical protein FLJ39553                                     | NM_173549    |       |       | 1.482 | 0.468 |       |       |       |       |                                                                                                                                |
| DKFZP566M1046  | hypothetical protein DKFZP566M1046                                | NM_032127    |       |       | 1.482 | 1.109 |       |       |       |       |                                                                                                                                |
| RNF30          | ring finger protein 30 isoform 1                                  | NM_032546    |       |       | 1.481 | 0.83  |       |       |       |       | Microtubule-based process. Negative regulation of microtubule depolymerization. Signal transduction. Protein ubiquitination.   |
| N/A            | N/A                                                               | AK092825     |       |       |       |       |       | 1.481 | 0.723 |       | Protein amino acid phosphorylation. Signal transduction. Alcohol metabolism. Lipid metabolism. Metabolism.                     |
| C1orf37        | C1orf37 protein                                                   | BC067775     |       |       | 1.481 | 0.303 |       |       |       |       |                                                                                                                                |
| ULBP2          | UL16 binding protein 2                                            | NM_025217    |       |       | 1.48  | 1.457 |       |       |       |       | Antigen presentation. Natural killer cell activation.                                                                          |
| KIAA1423       | KIAA1423 protein                                                  | AB037844     |       |       | 1.48  | 0.586 |       |       |       |       |                                                                                                                                |
| GRIN2B         | N-methyl-D-aspartate receptor subunit 2B precursor                | NM_000834    |       |       |       |       |       | 1.479 | 0.519 |       |                                                                                                                                |
| FLJ40121       | hypothetical protein FLJ40121                                     | NM_175904    |       |       |       |       |       | 1.479 | 0.973 |       |                                                                                                                                |
| CAGLP          | calglandulin-like protein                                         | NM_138705    |       |       |       |       |       | 1.479 | 0.639 |       |                                                                                                                                |
| FOXP3          | forkhead box P3                                                   | NM_014009    |       |       | 1.478 | 0.518 |       |       |       |       | Transcription. Regulation of transcription, DNA-dependent. Immune response.                                                    |
| UBASH3A        | UBASH3A protein                                                   | BC028138     |       |       |       |       |       | 1.477 | 0.393 |       | Metabolism.                                                                                                                    |
| OR4D9          | olfactory receptor, family 4, subfamily D, member 9*              | NM_001004711 |       |       |       |       |       | 1.477 | 1.126 |       |                                                                                                                                |
| KRTHA1         | type I hair keratin 1                                             | NM_002277    |       |       |       |       |       | 1.477 | 0.511 |       | Epidermis development.                                                                                                         |
| GHRH           | growth hormone releasing hormone preproprotein                    | NM_021081    |       |       |       |       |       | 1.477 | 0.382 |       | Signal transduction. G-protein signaling, coupled to cAMP nucleotide second messenger. Cell-cell signaling.                    |
| N/A            | N/A                                                               | BX161411     |       |       | 1.476 | 0.594 |       |       |       |       |                                                                                                                                |
| N/A            | N/A                                                               | AK127347     |       |       |       |       |       | 1.476 | 0.444 |       |                                                                                                                                |
| N/A            | N/A                                                               | AK055082     |       |       |       |       |       | 1.476 | 0.621 |       |                                                                                                                                |
| N/A            | testis-specific PTP-BL related Y protein                          | AF517635     |       |       | 1.476 | 1.118 |       |       |       |       |                                                                                                                                |
| IL3            | interleukin 3 precursor                                           | NM_000588    |       |       |       |       |       | 1.476 | 0.461 |       | Immune response. Cell-cell signaling. Neurogenesis. Positive regulation of cell proliferation.                                 |
| FLJ36980       | hypothetical protein FLJ36980                                     | NM_182598    |       |       |       |       |       | 1.475 | 0.537 |       |                                                                                                                                |
| ACTL7A         | actin-like 7A                                                     | BC014610     |       |       |       |       | 1.475 | 0.835 |       |       |                                                                                                                                |
| RIMS2          | regulating synaptic membrane exocytosis 2                         | NM_014677    |       |       | 1.474 | 0.712 |       |       |       |       | Intracellular protein transport.                                                                                               |
| N/A            | Unknown (protein for IMAGE:6141205)                               | BC050733     |       |       | 1.474 | 0.647 |       |       |       |       | Transport. Transport. Sensory perception. Visual perception. Response to drug.                                                 |
| FLJ23834       | hypothetical protein FLJ23834                                     | NM_152750    |       |       |       |       |       | 1.474 | 0.381 |       | Cell adhesion. Homophilic cell adhesion.                                                                                       |
| SRMS           | src-related kinase lacking C-terminal regulatory tyrosine and N   | NM_080823    |       |       |       |       |       | 1.473 | 0.655 |       | Regulation of transcription, DNA-dependent.                                                                                    |
| N/A            | N/A                                                               | AK126351     |       |       |       |       |       | 1.473 | 0.401 |       |                                                                                                                                |
| CYP8b1         | sterol 12-alpha hydroxylase CYP8B1                                | AF090318     |       |       |       |       |       | 1.473 | 0.705 |       | Electron transport. Transport.                                                                                                 |
| C10orf58       | chromosome 10 open reading frame 58                               | NM_032333    |       |       |       |       |       | 1.473 | 0.657 |       | Protein amino acid phosphorylation. Signal transduction. Alcohol metabolism. Lipid metabolism.                                 |
| ZNF493         | zinc finger protein 493                                           | NM_175910    | 1.013 | 0.757 |       |       | 1.472 | 0.906 |       |       | Regulation of transcription, DNA-dependent. Negative regulation of protein kinase activity. I-kappaB kinase/NF-kappaB cascade. |
| FLJ35848       | FLJ35848 protein                                                  | BC041481     |       |       | 1.472 | 0.761 |       |       |       |       |                                                                                                                                |
| BMP6           | bone morphogenetic protein 6 precursor                            | NM_001718    |       |       | 1.472 | 0.709 |       |       |       |       | Skeletal development. Cell differentiation. Growth.                                                                            |
| SRrp35         | serine-arginine repressor protein (35 kDa)                        | NM_080743    |       |       | 1.471 | 0.772 |       |       |       |       | Assembly of spliceosomal tri-snRNP. Regulation of alternative nuclear mRNA splicing, via spliceosome.                          |
| N/A            | Unknown (protein for IMAGE:3849975)                               | BC015216     |       |       | 1.471 | 0.766 |       |       |       |       | Protein amino acid phosphorylation. Signal transduction. Alcohol metabolism. Lipid metabolism. Metabolism.                     |
| LOC199675      | hypothetical protein LOC199675                                    | NM_174918    |       |       |       |       |       | 1.471 | 0.546 |       |                                                                                                                                |
| KNP3           | N/A                                                               | AB001535     |       |       |       |       |       | 1.471 | 0.33  |       | Cation transport. Sodium ion transport. Calcium ion transport.                                                                 |
| GPR6           | G protein-coupled receptor 6                                      | NM_005284    |       |       |       |       |       | 1.471 | 0.899 |       | Signal transduction. G-protein coupled receptor protein signaling pathway.                                                     |
| DDX25          | DEAD (Asp-Glu-Ala-Asp) box polypeptide 25                         | NM_013264    |       |       |       |       |       | 1.471 | 0.962 |       |                                                                                                                                |
| DKFZp434O2417  | hypothetical protein                                              | AL133015     |       |       |       |       |       | 1.47  | 0.407 |       | Protein biosynthesis. One-carbon compound metabolism. Biosynthesis. 10-formyltetrahydrofolate catabolism.                      |
| TRAF1          | TNF receptor-associated factor 1                                  | NM_005658    |       |       | 1.468 | 1.179 |       |       |       |       | Protein complex assembly. Apoptosis.                                                                                           |
| KRT24          | keratin 24                                                        | NM_019016    |       |       | 1.468 | 0.774 |       |       |       |       |                                                                                                                                |
| IF             | I factor (complement)                                             | NM_000204    |       |       | 1.467 | 0.723 |       |       |       |       | Proteolysis and peptidolysis. Immune response. Complement activation, classical pathway.                                       |
| N/A            | Similar to RIKEN cDNA 4930442L21 gene                             | BC036722     |       |       |       |       |       | 1.466 | 0.337 |       |                                                                                                                                |
| N/A            | N/A                                                               | AK127997     |       |       | 1.466 | 1.258 |       |       |       |       | Protein amino acid phosphorylation. Signal transduction. Alcohol metabolism. Lipid metabolism.                                 |

|               |                                                                   |              |       |       |       |       |       |                                                                                                       |
|---------------|-------------------------------------------------------------------|--------------|-------|-------|-------|-------|-------|-------------------------------------------------------------------------------------------------------|
| CLCNKB        | chloride channel Kb                                               | NM_000085    |       |       |       | 1.466 | 0.707 | Ion transport. Chloride transport. Excretion.                                                         |
| N/A           | molybdenum cofactor biosynthesis protein A                        | AF034374     | 1.464 | 0.713 |       |       |       | Mo-molybdopterin cofactor biosynthesis. Mo-molybdopterin cofactor biosynthesis.                       |
| N/A           | Unknown (protein for IMAGE:5755761)                               | BC084595     |       |       | 1.463 | 1.053 |       |                                                                                                       |
| N/A           | N/A                                                               | AK130927     | 1.463 | 1.452 |       |       |       |                                                                                                       |
| HEM1          | hematopoietic protein 1                                           | NM_005337    |       |       |       | 1.463 | 0.427 |                                                                                                       |
| N/A           | N/A                                                               | AK127597     |       |       | 1.46  | 0.527 |       |                                                                                                       |
| EPHA7         | ephrin receptor EphA7                                             | NM_004440    | 1.459 | 0.854 |       |       |       | Protein amino acid phosphorylation. Transmembrane receptor protein tyrosine kinase signaling pathway. |
| N/A           | N/A                                                               | AK124875     |       |       |       | 1.458 | 0.603 | Neurotransmitter transport.                                                                           |
| MGC20579      | hypothetical protein MGC20579                                     | NM_182614    | 1.458 | 0.695 |       |       |       |                                                                                                       |
| DKFZp434M0927 | hypothetical proteincDNA DKFZp434M0927 (from clone DKFZ; AL133660 |              | 1.458 | 0.696 |       |       |       | Protein folding.                                                                                      |
| KIAA0605      | KIAA0605 protein                                                  | AB011177     |       |       |       | 1.457 | 0.432 |                                                                                                       |
| GPR50         | G protein-coupled receptor 50                                     | NM_004224    |       |       |       | 1.457 | 0.656 | Signal transduction. G-protein coupled receptor protein signaling pathway. Cell-cell signaling.       |
| RRN3          | RRN3 RNA polymerase I transcription factor homolog                | NM_018427    | 1.456 | 0.438 |       |       |       | Transcription from RNA polymerase I promoter.                                                         |
| MYO15B        | MYO15B protein                                                    | BC027875     |       |       |       | 1.456 | 0.395 | ATP synthesis coupled proton transport.                                                               |
| FLJ14503      | hypothetical protein FLJ14503                                     | NM_152780    |       |       |       | 1.456 | 0.625 |                                                                                                       |
| CHRM4         | cholinergic receptor, muscarinic 4*                               | NM_000741    |       |       |       | 1.456 | 0.243 | Acetylcholine receptor signaling, muscarinic pathway. Synaptic transmission. Cell proliferation.      |
| P2RX3         | purinergic receptor P2X3                                          | NM_002559    |       |       |       | 1.455 | 0.559 | Ion transport. Signal transduction.                                                                   |
| C20orf71      | chromosome 20 open reading frame 71                               | NM_178466    |       |       |       | 1.455 | 0.506 |                                                                                                       |
| KCNIP4        | potassium channel-interacting protein 4 isoform 3                 | NM_147182    |       |       |       | 1.454 | 1.103 |                                                                                                       |
| TAF41         | TAF41 protein                                                     | NM_213609    |       |       | 1.453 | 0.742 |       |                                                                                                       |
| FLJ00299      | FLJ00299 protein                                                  | AK090408     | 1.453 | 0.926 |       |       |       | Protein amino acid phosphorylation. Signal transduction. Alcohol metabolism. Lipid metabolism.        |
| N/A           | diamine oxidase, copper/topa quinone containing"                  | U11863       |       |       |       | 1.452 | 0.515 | Metabolism.                                                                                           |
| IL1RN         | interleukin 1 receptor antagonist isoform 4                       | NM_173843    |       |       |       | 1.452 | 0.443 | Inflammatory response.                                                                                |
| SEMA3A        | semaphorin 3A                                                     | NM_006080    | 1.451 | 0.881 |       |       |       | Neurogenesis. Cell differentiation.                                                                   |
| N/A           | Unknown (protein for MGC:40403)                                   | BC030520     | 1.451 | 0.625 |       |       |       |                                                                                                       |
| ATOH7         | atonal homolog 7                                                  | NM_145178    | 1.451 | 0.779 |       |       |       |                                                                                                       |
| ABCA2         | *ATP-binding cassette, sub-family A, member 2 isoform a*          | NM_001606    | 1.053 | 0.968 | 1.451 | 0.876 |       | Lipid metabolism. Transport.                                                                          |
| N/A           | Unknown (protein for MGC:34223)                                   | BC058862     | 1.45  | 0.497 |       |       |       |                                                                                                       |
| MGC14436      | MGC14436 protein                                                  | BC007821     |       |       |       | 1.45  | 0.646 |                                                                                                       |
| CH25H         | cholesterol 25-hydroxylase                                        | NM_003956    | 1.45  | 0.495 |       |       |       | Lipid metabolism. Metabolism.                                                                         |
| HBZ           | zeta globin                                                       | NM_005332    |       |       |       | 1.449 | 0.534 | Transport. Oxygen transport.                                                                          |
| PACSN3        | protein kinase C and casein kinase substrate in neurons 3         | NM_016223    | 1.448 | 0.762 |       |       |       | Endocytosis. Negative regulation of endocytosis.                                                      |
| SPATA3        | testis and spermatogenesis cell apoptosis related protein 1       | NM_139073    |       |       |       | 1.447 | 0.467 |                                                                                                       |
| GJB1          | gap junction protein, beta 1, 32kDa (connexin 32, Charcot-Mar     | NM_000166    |       |       |       | 1.447 | 0.636 | Transport. Cell-cell signaling. Neurogenesis.                                                         |
| DKFZp667H0215 | hypothetical proteincDNA DKFZp667H0215 (from clone DKFZ; AL834507 |              |       |       | 1.447 | 0.384 |       |                                                                                                       |
| N/A           | Unknown (protein for MGC:45541)                                   | BC033839     | 1.446 | 0.256 |       |       |       |                                                                                                       |
| c-myc         | N/A                                                               | X66258       | 1.446 | 0.696 |       |       |       | Transcription. Iron ion homeostasis. Cell cycle arrest. Cell proliferation.                           |
| GALP          | galanin-like peptide precursor                                    | NM_033106    |       |       |       | 1.445 | 0.65  | Neuropeptide signaling pathway.                                                                       |
| DDC           | dopa decarboxylase (aromatic L-amino acid decarboxylase)          | NM_000790    |       |       |       | 1.445 | 0.587 | Amino acid metabolism. Catecholamine biosynthesis.                                                    |
| CA13          | carbonic anhydrase XIII                                           | NM_198584    | 1.445 | 0.48  |       |       |       | One-carbon compound metabolism.                                                                       |
| N/A           | N/A                                                               | AK125612     | 1.444 | 1     |       |       |       |                                                                                                       |
| N/A           | N/A                                                               | AK091683     | 1.444 | 0.929 |       |       |       |                                                                                                       |
| N/A           | N/A                                                               | AK127132     | 1.443 | 1.195 |       |       |       | Protein amino acid phosphorylation. Signal transduction. Alcohol metabolism. Lipid metabolism.        |
| hIAN6         | immune associated nucleotide 6                                    | NM_175571    |       |       |       | 1.443 | 0.33  |                                                                                                       |
| FLJ20315      | hypothetical protein FLJ20315                                     | NM_017763    | 1.442 | 0.415 |       |       |       | Protein ubiquitination.                                                                               |
| DKFZp451G182  | hypothetical proteincDNA DKFZp451G182 (from clone DKFZ; AL831966  |              | 1.442 | 0.545 |       |       |       |                                                                                                       |
| OR2AT4        | olfactory receptor, family 2, subfamily AT, member 4*             | NM_001005285 |       |       |       | 1.441 | 0.189 |                                                                                                       |
| N/A           | N/A                                                               | AK129856     | 1.441 | 0.967 |       |       |       | Amino acid metabolism. Aspartate catabolism. Biosynthesis.                                            |
| LOC132200     | LOC132200 protein                                                 | BC015210     | 1.441 | 1.066 |       |       |       |                                                                                                       |
| FLJ40142      | FLJ40142 protein                                                  | NM_207435    | 1.441 | 0.424 |       |       |       |                                                                                                       |
| TUBA4         | *tubulin, alpha 4*                                                | NM_025019    | 2.985 | 1.845 | 1.44  | 0.766 |       | Microtubule-based movement. Protein polymerization.                                                   |
| NKD2          | NKD2 protein                                                      | BC012176     |       |       |       | 1.44  | 0.79  |                                                                                                       |
| NSE2          | breast cancer membrane protein 101                                | NM_174911    | 1.438 | 1.254 |       |       |       | Protein amino acid phosphorylation. Signal transduction. Alcohol metabolism. Lipid metabolism.        |
| N/A           | N/A                                                               | AK123188     |       |       | 1.438 | 0.685 |       | Protein amino acid phosphorylation. Signal transduction. Alcohol metabolism. Lipid metabolism.        |
| GPR97         | G protein-coupled receptor 97                                     | NM_170776    |       |       | 1.438 | 0.509 |       | Signal transduction. Neuropeptide signaling pathway.                                                  |
| FLJ00176      | FLJ00176 protein                                                  | AK074105     |       |       | 1.437 | 0.844 |       | Biosynthesis. Chaperone cofactor dependent protein folding.                                           |

|                    |                                                                   |              |       |       |       |       |       |                                             |
|--------------------|-------------------------------------------------------------------|--------------|-------|-------|-------|-------|-------|---------------------------------------------|
| TBK1               | TBK1 protein                                                      | BC036764     |       |       |       | 1.436 | 0.539 | Protein amino acid phosphorylation.         |
| ANP32B             | * acidic (leucine-rich) nuclear phosphoprotein 32 family, memb    | NM_006401    |       |       | 1.436 | 0.63  |       |                                             |
| S100A3             | S100 calcium binding protein A3                                   | NM_002960    |       |       | 1.435 | 1.219 |       |                                             |
| LHCGR              | luteinizing hormone/choriogonadotropin receptor precursor         | NM_000233    |       |       |       |       | 1.435 | 0.618                                       |
| KIAA1457           | KIAA1457 protein                                                  | AB040890     |       |       | 1.434 | 1.075 |       |                                             |
| FGD5               | * FYVE, RhoGEF and PH domain containing 5"                        | NM_152536    | 1.176 | 1.95  |       |       | 1.434 | 0.397                                       |
| OR2T2              | * olfactory receptor, family 2, subfamily T, member 2"            | NM_001004136 |       |       | 1.433 | 0.293 |       |                                             |
| GRM1               | glutamate receptor, metabotropic 1"                               | NM_000838    |       |       |       |       | 1.433 | 0.869                                       |
| NALP12             | PYRIN-containing APAF1-like protein 7                             | NM_144687    |       |       |       |       | 1.432 | 0.412                                       |
| RGS16              | regulator of G-protein signalling 16                              | NM_002928    |       |       | 1.431 | 0.467 |       |                                             |
| IFNA16             | * interferon, alpha 16"                                           | NM_002173    | 1.033 | 1.443 | 1.431 | 0.605 |       |                                             |
| ATF3deltaZip2exon1 | ATF3deltaZip2                                                     | AB078028     |       |       | 1.431 | 0.994 |       |                                             |
| C12orf14           | chromosome 12 open reading frame 14                               | NM_021238    |       |       | 1.43  | 0.814 |       |                                             |
| RASGEF1C           | RasGEF domain family, member 1C"                                  | NM_175062    |       |       |       |       | 1.429 | 0.35                                        |
| HAS2               | hyaluronan synthase 2                                             | NM_005328    |       |       | 1.429 | 0.779 |       |                                             |
| SLC28A1            | solute carrier family 28 (sodium-coupled nucleoside transporte    | NM_004213    |       |       |       |       | 1.428 | 0.594                                       |
| ROS1               | proto-oncogene c-ros-1 protein precursor                          | NM_002944    |       |       | 1.428 | 0.967 |       |                                             |
| RAB11FIP4          | RAB11 family interacting protein 4 (class II)                     | NM_032932    |       |       |       |       | 1.428 | 0.664                                       |
| FLJ32028           | hypothetical protein FLJ32028                                     | NM_152680    |       |       | 1.428 | 0.365 |       |                                             |
| MGC34761           | hypothetical protein MGC34761                                     | NM_173619    |       |       |       |       | 1.427 | 0.466                                       |
| FAM45B             | * family with sequence similarity 45, member B"                   | NM_018472    |       |       | 1.427 | 1.183 |       |                                             |
| SH2D4B             | SH2 domain containing 4B                                          | NM_207372    |       |       |       |       | 1.426 | 0.446                                       |
| N/A                | N/A                                                               | AK125739     |       |       |       |       | 1.426 | 0.489                                       |
| N/A                | N/A                                                               | AK125480     |       |       |       |       | 1.424 | 0.613                                       |
| MYO1A              | myosin IA                                                         | NM_005379    |       |       |       |       | 1.424 | 0.479                                       |
| FLJ32011           | hypothetical protein FLJ32011                                     | NM_182516    |       |       |       |       | 1.424 | 0.516                                       |
| PFKFB1             | 6-phosphofructo-2-kinase/fructose-2, 6-bisphosphatase 1"          | NM_002625    |       |       |       |       | 1.423 | 0.522                                       |
| N/A                | Unknown (protein for MGC:34845)                                   | BC023973     |       |       | 1.423 | 1.097 |       |                                             |
| MUC4               | mucin 4                                                           | AF058803     |       |       |       |       | 1.423 | 0.406                                       |
| FGF6               | fibroblast growth factor 6 precursor                              | NM_020996    |       |       |       |       | 1.422 | 0.393                                       |
| ASB13              | ASB13 protein                                                     | BC012056     |       |       | 1.422 | 1.008 |       |                                             |
| REN                | renin precursor                                                   | NM_000537    |       |       | 1.421 | 0.465 |       |                                             |
| IL18               | interleukin 18 proprotein                                         | NM_001562    |       |       | 1.421 | 0.602 |       |                                             |
| CHRNA6             | cholinergic receptor, nicotinic, alpha polypeptide 6"             | NM_004198    |       |       |       |       | 1.421 | 0.591                                       |
| C10orf64           | chromosome 10 open reading frame 64                               | NM_173524    |       |       |       |       | 1.421 | 0.415                                       |
| SERPINB7           | * serine (or cysteine) proteinase inhibitor, clade B (ovalbumin), | NM_003784    |       |       |       |       | 1.42  | 0.597                                       |
| GRASP              | GRP1 (general receptor for phosphoinositides 1)-associated s      | NM_181711    |       |       | 1.42  | 1.044 |       |                                             |
| HUR                | N/A                                                               | X98307       |       |       | 1.419 | 0.659 |       |                                             |
| FAM13C1            | * family with sequence similarity 13, member C1 isoform 1"        | NM_198215    |       |       | 1.419 | 0.438 |       |                                             |
| DKFZp547f048       | hypothetical proteincDNA DKFZp547f048 (from clone DKFZp5          | AL834414     | 1.397 | 1.613 |       |       | 1.419 | 0.834                                       |
| DEFB124            | defensin beta 124                                                 | AY122476     |       |       |       |       | 1.417 | 0.441                                       |
| TNFRSF5            | TNFRSF5 protein                                                   | BC064518     |       |       | 1.416 | 0.418 |       |                                             |
| TH                 | tyrosine hydroxylase isoform a                                    | NM_199292    |       |       | 1.416 | 0.839 |       |                                             |
| MAT1A              | methionine adenosyltransferase I, alpha"                          | BC018359     |       |       |       |       | 1.416 | 0.702                                       |
| FP15529            | unknown                                                           | AF495723     |       |       |       |       | 1.416 | 0.677                                       |
| AP1S1              | * adaptor-related protein complex 1, sigma 1 subunit isoform 2    | NM_057089    | 1.312 | 1.174 | 1.416 | 0.848 |       |                                             |
| NELL2              | NELL2 protein                                                     | BC020544     |       |       | 1.415 | 0.462 |       |                                             |
| GYLTL1B            | glycosyltransferase-like 1B                                       | NM_152312    |       |       |       |       | 1.415 | 0.56                                        |
| FLJ00404           | FLJ00404 protein                                                  | AK090482     |       |       | 1.415 | 0.979 |       |                                             |
| COL17A1            | alpha 1 type XVII collagen                                        | NM_000494    | 1.076 | 1.675 |       |       | 1.415 | 0.993                                       |
| ANKRD20A           | ankyrin repeat domain 20A                                         | NM_032250    |       |       |       |       | 1.415 | 0.315                                       |
| ZA20D3             | * zinc finger, A20 domain containing 3"                           | NM_019006    |       |       | 1.414 | 0.741 |       |                                             |
| NAGK               | N-Acetylglucosamine kinase                                        | NM_017567    |       |       | 1.414 | 0.513 |       |                                             |
| MTP                | microsomal triglyceride transfer protein large subunit precursor  | NM_000253    |       |       | 1.414 | 0.493 |       |                                             |
| MGC24047           | hypothetical protein MGC24047                                     | NM_178840    |       |       | 1.414 | 1.042 |       |                                             |
| FLJ45880           | FLJ45880 protein                                                  | NM_207404    |       |       |       |       | 1.414 | 0.398                                       |
|                    |                                                                   |              |       |       |       |       |       | Regulation of transcription, DNA-dependent. |

|                |                                                                 |              |       |       |       |       |                                                                                                   |
|----------------|-----------------------------------------------------------------|--------------|-------|-------|-------|-------|---------------------------------------------------------------------------------------------------|
| CHSY2          | chodroitin synthase 2                                           | AJ578034     | 1.414 | 0.83  |       |       |                                                                                                   |
| LOC387763      | LOC387763 protein                                               | BC052560     | 1.413 | 0.621 |       |       |                                                                                                   |
| KRN1           | * keratin, cuticle, ultrahigh sulphur 1*                        | NM_005553    | 1.413 | 0.836 |       |       | Epidermis development.                                                                            |
| N/A            | N/A                                                             | AK123889     | 1.412 | 0.732 |       |       | Ciliary or flagellar motility.                                                                    |
| LY64           | lymphocyte antigen 64 homolog, radioprotective 105kDa*          | NM_005582    |       |       | 1.412 | 0.355 | Inflammatory response.                                                                            |
| KIAA1876       | KIAA1876 protein                                                | AB058779     | 1.412 | 1.276 |       |       | Protein amino acid phosphorylation. Signal transduction. Alcohol metabolism. Lipid metabolism.    |
| IFI44          | * interferon-induced, hepatitis C-associated microtubular aggrt | NM_006417    | 1.412 | 0.562 |       |       | Response to virus.                                                                                |
| TAF2           | TAF2 protein                                                    | NM_178539    | 1.446 | 1.58  | 1.411 |       | 0.545                                                                                             |
| N/A            | N/A                                                             | AK093042     |       |       | 1.411 |       | 0.566                                                                                             |
| FRMPD2         | FERM and PDZ domain containing 2                                | NM_152428    |       |       | 1.411 |       | 0.562                                                                                             |
| CYP27B1        | CYP27B1 protein                                                 | BC001776     |       |       | 1.411 |       | 0.486                                                                                             |
| WDFY3          | WD repeat and FYVE domain containing 3 isoform 1                | NM_014991    | 1.41  | 0.764 |       |       | Electron transport. Lipid metabolism. Transport. Calcium ion homeostasis. Vitamin biosynthesis.   |
| S100A8         | S100 calcium-binding protein A8                                 | NM_002964    |       |       | 1.41  |       | 0.357                                                                                             |
| CDH13          | cadherin 13 preproprotein                                       | NM_001257    | 1.41  | 0.462 |       |       | Cell adhesion. Homophilic cell adhesion.                                                          |
| MUC12          | transmembrane mucin 12                                          | AF147790     |       |       | 1.409 |       | 0.427                                                                                             |
| KIAA0863       | KIAA0863 protein                                                | NM_014913    | 1.409 | 0.833 |       |       | Regulation of transcription, DNA-dependent.                                                       |
| OR52A4         | * olfactory receptor, family 52, subfamily A, member 4*         | NM_001005222 | 1.408 | 1.784 |       |       |                                                                                                   |
| N/A            | Unknown (protein for MGC:45495)                                 | BC032733     | 1.408 | 1.035 |       |       | Immune response.                                                                                  |
| GPR84          | inflammation-related G protein-coupled receptor EX33            | BC020614     | 1.408 | 0.425 |       |       | G-protein coupled receptor protein signaling pathway.                                             |
| ESM1           | endothelial cell-specific molecule 1 precursor                  | NM_007036    | 1.408 | 0.449 |       |       | Regulation of cell growth.                                                                        |
| ASB8           | ankyrin repeat and SOCS box-containing 8                        | NM_024095    | 1.408 | 0.818 |       |       | Intracellular signaling cascade.                                                                  |
| KRT16          | keratin 16                                                      | NM_005557    |       |       | 1.407 |       | 0.446                                                                                             |
| DSP            | desmoplakin                                                     | NM_004415    | 1.407 | 0.468 |       |       | Epidermis development.                                                                            |
| SLC36A3        | solute carrier family 36 (proton/amino acid symporter), membe   | NM_181774    |       |       | 1.406 |       | 0.486                                                                                             |
| GADD45A        | * growth arrest and DNA-damage-inducible, alpha*                | NM_001924    | 1.406 | 0.989 |       |       | Regulation of cyclin dependent protein kinase activity. DNA repair. Apoptosis. Cell cycle arrest. |
| FGFBP1         | fibroblast growth factor binding protein 1                      | NM_005130    |       |       | 1.406 |       | 0.843                                                                                             |
| OR8D2          | * olfactory receptor, family 8, subfamily D, member 2*          | NM_001002918 | 1.155 | 1.408 | 1.405 |       | 0.53                                                                                              |
| N/A            | N/A                                                             | U82319       |       |       | 1.404 |       | 1.025                                                                                             |
| HARSL          | histidyl-tRNA synthetase-like                                   | NM_012208    | 1.404 | 0.713 |       |       | Protein biosynthesis. Histidyl-tRNA aminoacylation.                                               |
| B7-H4          | immune costimulatory protein B7-H4                              | NM_024626    | 1.404 | 1.066 |       |       |                                                                                                   |
| L1CAM          | L1 cell adhesion molecule isoform 1 precursor                   | NM_000425    |       |       | 1.403 |       | 0.779                                                                                             |
| KCNK3          | potassium channel, subfamily K, member 3*                       | NM_002246    |       |       | 1.403 |       | 0.824                                                                                             |
| CD79B          | CD79B antigen isoform 1 precursor                               | NM_000626    |       |       | 1.403 |       | 0.484                                                                                             |
| MGC87693       | similar to ZP1 precursor                                        | NM_207341    |       |       | 1.402 |       | 0.326                                                                                             |
| ITM2B          | integral membrane protein 2B                                    | NM_021999    | 1.402 | 0.784 |       |       | Neurogenesis. Perception of sound.                                                                |
| EBF            | early B-cell factor                                             | NM_024007    | 1.402 | 1.155 |       |       | Transcription. Regulation of transcription, DNA-dependent. Development.                           |
| RPS6KA1        | * ribosomal protein S6 kinase, 90kDa, polypeptide 1*            | NM_002953    | 1.401 | 0.883 |       |       | Protein amino acid phosphorylation. Signal transduction.                                          |
| EB-1           | cajalain 2 isoform a                                            | NM_152788    | 1.401 | 0.809 |       |       |                                                                                                   |
| TCF21          | transcription factor 21                                         | NM_198392    | 1.399 | 0.711 |       |       | Transcription. Regulation of transcription, DNA-dependent. Mesoderm development.                  |
| OR2T35         | * olfactory receptor, family 2, subfamily T, member 35*         | NM_001001827 | 1.399 | 0.423 |       |       |                                                                                                   |
| N/A            | N/A                                                             | AK127627     | 1.399 | 0.778 |       |       |                                                                                                   |
| KIAA0418       | N/A                                                             | AB007878     |       |       | 1.399 |       | 0.678                                                                                             |
| PADI6          | peptidylarginine deiminase type 6                               | NM_207421    |       |       | 1.398 |       | 0.385                                                                                             |
| Beta4GalNAc-T4 | * beta 1,4-N-acetylgalactosaminyltransferases IV*               | NM_178537    | 1.398 | 0.75  |       |       |                                                                                                   |
| PCH12          | protocadherin 12 precursor                                      | NM_016580    |       |       | 1.397 |       | 0.496                                                                                             |
| ELA3B          | elastase 3B                                                     | NM_007352    |       |       | 1.397 |       | 0.249                                                                                             |
| OR5AU1         | * olfactory receptor, family 5, subfamily AU, member 1*         | NM_001004731 | 1.396 | 0.864 |       |       |                                                                                                   |
| GPR10          | G protein-coupled receptor 10                                   | NM_004248    |       |       | 1.396 |       | 0.379                                                                                             |
| FLJ12057       | hypothetical protein FLJ12057                                   | NM_024768    |       |       | 1.396 |       | 0.29                                                                                              |
| N/A            | myosin-reactive immunoglobulin light chain variable region      | AF035044     | 1.395 | 0.923 |       |       |                                                                                                   |
| KCNK15         | * potassium family, subfamily K, member 15*                     | NM_022358    | 1.395 | 0.494 |       |       | Ion transport. Potassium ion transport.                                                           |
| COLM           | collomin                                                        | NM_181789    | 1.395 | 0.985 |       |       | Phosphate transport. Cell adhesion.                                                               |
| ALOX5AP        | arachidonate 5-lipoxygenase-activating protein                  | NM_001629    | 1.395 | 0.809 |       |       | Inflammatory response. Leukotriene biosynthesis.                                                  |
| N/A            | N/AcdNA DKFz434M0320 (from clone DKFz434M0320).                 | AL137560     | 1.394 | 0.83  |       |       | Protein amino acid dephosphorylation.                                                             |
| N/A            | N/A                                                             | AK056450     | 1.394 | 1.113 |       |       |                                                                                                   |
| PMCHL2         | pro-melanin-concentrating hormone-like 2                        | NM_031888    | 1.393 | 0.831 |       |       | Synaptic transmission. Behavior.                                                                  |

|               |                                                                    |              |       |       |       |       |       |       |                                                                                                                              |
|---------------|--------------------------------------------------------------------|--------------|-------|-------|-------|-------|-------|-------|------------------------------------------------------------------------------------------------------------------------------|
| IGLL1         | immunoglobulin lambda-like polypeptide 1 isoform a precursor       | NM_020070    | 1.064 | 0.819 |       |       | 1.393 | 0.684 | Immune response.                                                                                                             |
| DKFZp4341099  | hypothetical protein DKFZp4341099                                  | NM_032269    |       |       |       |       | 1.393 | 0.591 |                                                                                                                              |
| TRAR3         | trace amine receptor 3                                             | NM_175057    |       | 1.391 | 0.992 |       |       |       |                                                                                                                              |
| FLJ13955      | hypothetical protein FLJ13955                                      | NM_024759    |       | 1.389 | 0.874 |       |       |       |                                                                                                                              |
| XTP7          | protein 7 transactivated by hepatitis B virus X antigen            | NM_138568    |       |       |       |       | 1.388 | 0.94  |                                                                                                                              |
| LYZ           | lysozyme precursor                                                 | NM_000239    |       |       |       |       | 1.388 | 0.775 | Carbohydrate metabolism. Cell wall catabolism. Cytolysis. Defense response to bacteria. Immune response.                     |
| TUBA8         | tubulin, alpha 8*                                                  | NM_018943    |       |       |       |       | 1.387 | 0.788 | Microtubule-based movement. Protein polymerization.                                                                          |
| FABP6         | gastrotropin                                                       | NM_001445    |       |       |       |       | 1.387 | 0.801 | Lipid metabolism. Transport. Negative regulation of cell proliferation.                                                      |
| N/A           | N/A                                                                | AK130702     |       |       |       | 1.386 | 0.577 |       | Protein amino acid phosphorylation. Signal transduction. Alcohol metabolism. Lipid metabolism.                               |
| FAM12B        | human epididymis-specific 3 beta precursor                         | NM_022360    |       |       |       |       | 1.386 | 0.457 | Spermatid cell development.                                                                                                  |
| tre           | oncogene                                                           | X63547       |       |       |       |       | 1.385 | 0.377 | Ubiquitin-dependent protein catabolism. Ubiquitin cycle.                                                                     |
| SLC10A1       | solute carrier family 10 (sodium/bile acid cotransporter family),  | NM_003049    |       |       |       |       | 1.385 | 0.819 | Ion transport. Sodium ion transport. Organic anion transport.                                                                |
| KRTAP10-7     | keratin associated protein 10-7                                    | NM_198689    |       | 1.385 | 0.761 |       |       |       |                                                                                                                              |
| FGF14         | fibroblast growth factor 14 isoform 1B                             | NM_175929    |       |       |       |       | 1.385 | 0.513 | Signal transduction. Cell-cell signaling. Neurogenesis.                                                                      |
| NTF3          | neurotrophin 3 precursor                                           | NM_002527    |       | 1.384 | 0.864 |       |       |       | Anti-apoptosis. Cell motility. Signal transduction. Cell-cell signaling. Neurogenesis.                                       |
| TENS1         | tensin-like SH2 domain containing 1                                | NM_022748    |       | 1.383 | 0.95  |       |       |       | Protein amino acid dephosphorylation. Cell cycle. Intracellular signaling cascade.                                           |
| N/A           | N/A                                                                | AK128478     |       | 1.383 | 0.875 |       |       |       |                                                                                                                              |
| N/A           | N/A                                                                | AK126488     |       | 1.383 | 0.375 |       |       |       | Nuclear mRNA splicing, via spliceosome. MRNA processing. RNA splicing.                                                       |
| HC6           | HC6                                                                | AF269286     |       |       |       | 1.383 | 0.306 |       | Cell adhesion.                                                                                                               |
| DKFZp434H0735 | hypothetical protein                                               | AL117509     |       |       |       |       | 1.383 | 0.67  |                                                                                                                              |
| BNC1          | basonuclin 1                                                       | NM_001717    |       | 1.383 | 0.593 |       |       |       | Transcription. Regulation of transcription, DNA-dependent. Positive regulation of cell proliferation. Epidermis development. |
| N/A           | N/A                                                                | AK128281     |       | 1.382 | 0.634 |       |       |       |                                                                                                                              |
| KIAA1579      | hypothetical protein FLJ10770                                      | NM_018211    |       | 1.382 | 1.116 |       |       |       |                                                                                                                              |
| GABRQ         | gamma-aminobutyric acid (GABA) receptor, theta precursor*          | NM_018558    |       |       |       |       | 1.382 | 0.667 | Ion transport. Signal transduction. Synaptic transmission.                                                                   |
| FLJ31846      | hypothetical protein FLJ31846                                      | NM_144974    |       | 1.382 | 0.887 |       |       |       | Protein ubiquitination.                                                                                                      |
| N/A           | Unknown (protein for IMAGE:4154275)                                | BC018318     |       |       |       |       | 1.381 | 0.481 |                                                                                                                              |
| MGC35140      | hypothetical protein MGC35140                                      | NM_152759    |       |       |       |       | 1.381 | 0.344 |                                                                                                                              |
| FLJ26443      | FLJ26443 protein                                                   | NM_207440    |       |       |       |       | 1.381 | 0.683 |                                                                                                                              |
| CAMP          | cathelicidin antimicrobial peptide                                 | NM_004345    |       |       |       |       | 1.381 | 0.292 | Response to pest, pathogen or parasite. Defense response to bacteria.                                                        |
| DKFZp434H1419 | hypothetical protein cDNA DKFZp434H1419 (from clone DKFZ)          | AL137534     |       | 1.38  | 0.26  |       |       |       |                                                                                                                              |
| TACSTD2       | tumor-associated calcium signal transducer 2 precursor             | NM_002353    |       | 1.379 | 0.587 |       |       |       | Cell surface receptor linked signal transduction. Sensory perception. Visual perception. Cell proliferation.                 |
| N/A           | Unknown (protein for MGC:29947)                                    | BC019830     |       |       |       | 1.379 | 0.393 |       |                                                                                                                              |
| N/A           | N/A                                                                | AK129980     |       |       |       |       | 1.379 | 0.087 |                                                                                                                              |
| GSDM1         | gasdermin 1                                                        | NM_178171    |       |       |       |       | 1.379 | 0.765 |                                                                                                                              |
| GPR88         | G-protein coupled receptor 88                                      | NM_022049    |       | 1.379 | 0.457 |       |       |       | Signal transduction. G-protein coupled receptor protein signaling pathway.                                                   |
| FKSG48        | FKSG48                                                             | AF336875     |       | 1.379 | 1.252 |       |       |       |                                                                                                                              |
| CAMK1G        | calcium/calmodulin-dependent protein kinase 1G                     | NM_020439    | 1.64  | 2.277 |       |       | 1.379 | 0.61  | Protein amino acid phosphorylation.                                                                                          |
| APCDD1        | adenomatosis polyposis coli down-regulated 1                       | AB104887     |       |       |       |       | 1.379 | 0.737 |                                                                                                                              |
| N/A           | interleukin 30                                                     | BC062422     |       |       |       |       | 1.378 | 0.623 |                                                                                                                              |
| N/A           | N/A                                                                | AK128707     |       | 1.378 | 1.005 |       |       |       |                                                                                                                              |
| CSF2RB        | colony stimulating factor 2 receptor, beta, low-affinity (granuloc | NM_000395    |       |       |       |       | 1.378 | 0.316 | Signal transduction. Respiratory gaseous exchange. Cytokine and chemokine mediated signaling pathway.                        |
| KIAA1503      | KIAA1503 protein                                                   | AB040936     |       | 1.377 | 0.889 |       |       |       |                                                                                                                              |
| WFDC8         | WAP four-disulfide core domain 8 precursor                         | NM_181510    |       |       |       |       | 1.376 | 0.597 |                                                                                                                              |
| NKCC2         | Na-K-2Cl cotransporter isoform IV                                  | AB032527     |       |       |       |       | 1.376 | 0.721 |                                                                                                                              |
| FLJ00050      | FLJ00050 protein                                                   | AK024458     |       |       |       |       | 1.376 | 0.551 |                                                                                                                              |
| THSD1         | thrombospondin type 1 domain-containing 1 isoform 1                | NM_018676    |       | 1.375 | 0.578 |       |       |       |                                                                                                                              |
| N/A           | Unknown (protein for IMAGE:4042121)                                | BC015977     |       | 1.375 | 1.146 |       |       |       |                                                                                                                              |
| KIAA0277      | N/A                                                                | D87467       |       | 1.375 | 0.652 |       |       |       | Small GTPase mediated signal transduction. Neurogenesis.                                                                     |
| N/A           | N/A                                                                | AK092212     | 1.016 | 0.934 |       |       | 1.374 | 0.446 |                                                                                                                              |
| N/A           | N/A                                                                | AK055571     |       |       |       |       | 1.374 | 0.672 |                                                                                                                              |
| TLR6          | toll-like receptor 6                                               | NM_006068    |       | 1.373 | 0.353 |       |       |       | Signal transduction. Activation of NF-kappaB-inducing kinase. T-helper 1 type immune response.                               |
| OR8A1         | olfactory receptor, family 8, subfamily A, member 1*               | NM_001005194 |       |       |       |       | 1.373 | 1.012 |                                                                                                                              |
| Na/Pi-4       | renal Na+-dependent phosphate cotransporter                        | D28532       |       | 1.373 | 0.589 |       |       |       | Ion transport. Sodium ion transport. Phosphate transport.                                                                    |
| N/A           | * Similar to phospholipase A2, group IVB (cytosolic)"              | BC035335     | 1.016 | 1.553 |       | 1.373 | 0.706 |       | Phospholipid catabolism.                                                                                                     |
| SSTR1         | somatostatin receptor 1                                            | NM_001049    |       | 1.372 | 0.811 |       |       |       | G-protein signaling, coupled to cyclic nucleotide second messenger. Cell-cell signaling. Response to nutrients. Digestion.   |
| NUP210        | nucleoporin 210                                                    | NM_024923    |       |       |       |       | 1.372 | 0.905 | Development.                                                                                                                 |

|               |                                                              |           |       |       |       |       |       |                                 |                                                                                                                                   |
|---------------|--------------------------------------------------------------|-----------|-------|-------|-------|-------|-------|---------------------------------|-----------------------------------------------------------------------------------------------------------------------------------|
| N/A           | N/A                                                          | AK124132  |       |       |       | 1.372 | 0.514 |                                 |                                                                                                                                   |
| HRIHFB2099    | N/A                                                          | AB015334  |       |       |       | 1.372 | 0.509 |                                 |                                                                                                                                   |
| FLJ39501      | hypothetical protein FLJ39501                                | NM_173483 |       |       |       | 1.372 | 0.436 | Electron transport.             |                                                                                                                                   |
| FLJ20225      | hypothetical protein FLJ20225                                | NM_019062 |       |       | 1.372 | 1.219 |       | Protein ubiquitination.         |                                                                                                                                   |
| C20orf53      | chromosome 20 open reading frame 53                          | NM_178472 |       |       | 1.372 | 0.213 |       |                                 |                                                                                                                                   |
| ZNF100        | zinc finger protein 100                                      | NM_173531 |       |       | 1.371 | 0.39  |       |                                 |                                                                                                                                   |
| SLC39A8       | * solute carrier family 39 (zinc transporter), member 8*     | NM_022154 |       |       | 1.371 | 0.415 |       | Transport. Metal ion transport. |                                                                                                                                   |
| PDE3B         | phosphodiesterase 3B, cGMP-inhibited*                        | NM_000922 |       |       |       |       | 1.371 | 0.681                           | Signal transduction.                                                                                                              |
| N/A           | polymerase                                                   | AF080232  |       |       | 1.371 | 0.267 |       |                                 |                                                                                                                                   |
| BRF2          | RNA polymerase III transcription initiation factor BRF2      | NM_018310 |       |       | 1.371 | 1.238 |       |                                 | Cell cycle.                                                                                                                       |
| DKFZp547F072  | hypothetical protein DKFZp547F072                            | NM_032274 |       |       |       |       | 1.37  | 0.757                           |                                                                                                                                   |
| N/A           | N/A                                                          | AK074401  |       |       |       |       | 1.369 | 0.584                           |                                                                                                                                   |
| N/A           | Similar to GPI-gamma 4                                       | BC036784  | 1.232 | 1.124 | 1.368 | 0.785 |       |                                 |                                                                                                                                   |
| MERTK         | c-mer proto-oncogene tyrosine kinase                         | NM_006343 |       |       | 1.368 | 1.066 |       |                                 | Protein amino acid phosphorylation. Cell surface receptor linked signal transduction. Cell-cell signaling. Sensory perception.    |
| HS3ST4        | heparan sulfate D-glucosaminyl 3-O-sulfotransferase 4        | NM_006040 |       |       |       |       | 1.368 | 0.621                           | Heparan sulfate proteoglycan metabolism.                                                                                          |
| FLJ30594      | hypothetical protein FLJ30594                                | NM_153011 |       |       | 1.368 | 0.971 |       |                                 |                                                                                                                                   |
| PMSP          | Papillomavirus minor structural protein interacting protein  | AJ437509  |       |       |       |       | 1.367 | 0.784                           |                                                                                                                                   |
| N/A           | N/A                                                          | AK123156  |       |       | 1.366 | 0.838 |       |                                 |                                                                                                                                   |
| LASS3         | LAG1 longevity assurance homolog 3                           | NM_178842 |       |       |       |       | 1.366 | 0.81                            |                                                                                                                                   |
| DGKH          | * diacylglycerol kinase, eta isoform 2*                      | NM_178009 |       |       | 1.366 | 1.34  |       |                                 |                                                                                                                                   |
| ISL1          | ISL1 protein                                                 | BC031213  |       |       |       |       | 1.365 | 0.454                           | Regulation of transcription, DNA-dependent. Development.                                                                          |
| ARF3          | ADP-ribosylation factor 3                                    | NM_001659 |       |       | 1.365 | 0.973 |       |                                 | Intracellular protein transport. Small GTPase mediated signal transduction.                                                       |
| AKR7A3        | * aldo-keto reductase family 7, member A3*                   | NM_012067 |       |       | 1.365 | 0.65  |       |                                 | Aldehyde metabolism.                                                                                                              |
| OPRD1         | opioid receptor, delta 1*                                    | NM_000911 |       |       |       |       | 1.364 | 0.978                           | Immune response. Signal transduction. G-protein signaling, coupled to cyclic nucleotide second messenger. Sensory perception.     |
| N/A           | ALIN3064                                                     | AY358107  |       |       |       |       | 1.364 | 0.571                           |                                                                                                                                   |
| PXT1          | peroxisomal, testis specific 1*                              | NM_152990 |       |       |       |       | 1.363 | 0.717                           |                                                                                                                                   |
| NAG13         | NAG13                                                        | AF194537  |       |       |       |       | 1.363 | 0.203                           |                                                                                                                                   |
| EAT2          | SH2 domain-containing molecule EAT2                          | NM_053282 |       |       |       |       | 1.363 | 0.62                            |                                                                                                                                   |
| SEMA4A        | semaphorin B                                                 | NM_022367 |       |       |       |       | 1.362 | 1.032                           | Neurogenesis. Cell differentiation.                                                                                               |
| KIAA1365      | densin-180                                                   | NM_020794 |       |       | 1.362 | 0.645 |       |                                 |                                                                                                                                   |
| CRHBP         | corticotropin releasing hormone binding protein              | NM_001882 |       |       |       |       | 1.362 | 0.552                           | Signal transduction. Pregnancy. Learning and/or memory.                                                                           |
| MAGEE2        | * melanoma antigen, family E, 2*                             | NM_138703 |       |       |       |       | 1.361 | 0.544                           |                                                                                                                                   |
| IRTA1         | immunoglobulin superfamily receptor translocation associated | NM_031282 |       |       |       |       | 1.361 | 0.701                           |                                                                                                                                   |
| ETV5          | ets variant gene 5 (ets-related molecule)                    | NM_004454 |       |       | 1.361 | 1.147 |       |                                 | Regulation of transcription, DNA-dependent.                                                                                       |
| ABCG1         | ATP-binding cassette sub-family G member 1 isoform 1         | NM_207630 |       |       |       |       | 1.361 | 0.584                           | Lipid transport. Cholesterol metabolism. Detection of hormone stimulus. Response to organic substance.                            |
| RRAD          | Ras-related associated with diabetes                         | BC057815  |       |       | 1.36  | 0.48  |       |                                 | Small GTPase mediated signal transduction.                                                                                        |
| KLHL6         | kelch-like 6                                                 | NM_130446 |       |       |       |       | 1.36  | 0.337                           |                                                                                                                                   |
| CCL25         | small inducible cytokine A25 isoform 1 precursor             | NM_005624 |       |       |       |       | 1.36  | 0.699                           | Chemotaxis. Inflammatory response. G-protein coupled receptor protein signaling pathway. Sensory perception.                      |
| C14orf6       | chromosome 14 open reading frame 6                           | NM_145250 |       |       |       |       | 1.36  | 0.433                           |                                                                                                                                   |
| N/A           | N/A                                                          | AK075117  |       |       |       |       | 1.359 | 0.494                           | Inflammatory response. I-kappaB kinase/NF-kappaB cascade. Detection of virus. Innate immune response.                             |
| MYOC          | myocilin                                                     | BC029261  |       |       | 1.359 | 1.114 |       |                                 | Visual perception. Morphogenesis.                                                                                                 |
| N/A           | N/A                                                          | AK094921  |       |       |       |       | 1.358 | 0.233                           |                                                                                                                                   |
| KIAA0441      | N/A                                                          | AB007901  |       |       | 1.358 | 1.086 |       |                                 | Protein amino acid phosphorylation. Signal transduction. Alcohol metabolism. Lipid metabolism.                                    |
| GOLPH2        | golgi phosphoprotein 2                                       | NM_016548 |       |       | 1.358 | 0.644 |       |                                 |                                                                                                                                   |
| SH3GL3        | SH3-domain GRB2-like 3                                       | NM_003027 |       |       | 1.357 | 0.628 |       |                                 | Signal transduction. Central nervous system development.                                                                          |
| RBPSUHL       | recombining binding protein L                                | NM_014276 |       |       | 1.357 | 0.622 |       |                                 | Transcription. Regulation of transcription, DNA-dependent. Signal transduction.                                                   |
| N/A           | Go protein                                                   | Y18213    |       |       |       |       | 1.357 | 0.485                           | Muscle contraction. Signal transduction. G-protein coupled receptor protein signaling pathway. Neurogenesis. Axon guidance.       |
| MT6-MMP       | membrane type matrix metalloproteinase number 6              | AJ272137  |       |       | 1.357 | 0.317 |       |                                 | Proteolysis and peptidolysis. Inflammatory response.                                                                              |
| GCM1          | glial cells missing homolog a                                | NM_003643 |       |       |       |       | 1.357 | 0.57                            | Regulation of transcription, DNA-dependent. Morphogenesis.                                                                        |
| FLJ36870      | hypothetical protein FLJ36870                                | NM_173658 |       |       |       |       | 1.357 | 0.566                           |                                                                                                                                   |
| DKFZp451P2311 | hypothetical protein                                         | BX537997  |       |       |       |       | 1.357 | 0.386                           |                                                                                                                                   |
| CACNA1H       | calcium channel, voltage-dependent, alpha 1H subunit isoform | NM_021098 |       |       |       |       | 1.357 | 0.951                           | Cation transport. Calcium ion transport. Muscle contraction. Muscle development. Myoblast fusion.                                 |
| UNQ541        | GSGL541                                                      | NM_205854 |       |       |       |       | 1.355 | 0.764                           |                                                                                                                                   |
| N/A           | myosin                                                       | L29137    |       |       | 1.355 | 0.343 |       |                                 |                                                                                                                                   |
| N/A           | N/A                                                          | AK127800  | 1.033 | 1.246 | 1.355 | 0.815 |       |                                 | Protein amino acid phosphorylation. Signal transduction. Alcohol metabolism. Lipid metabolism. Metabolism.                        |
| N/A           | cyclin-dependent kinase inhibitor                            | AF488410  |       |       | 1.355 | 0.632 |       |                                 | Regulation of cyclin dependent protein kinase activity. Cell cycle. Cell cycle arrest. Negative regulation of cell proliferation. |

|              |                                                               |              |       |       |       |       |       |                                                                                                           |
|--------------|---------------------------------------------------------------|--------------|-------|-------|-------|-------|-------|-----------------------------------------------------------------------------------------------------------|
| KRTAP10-10   | keratin associated protein 10-10                              | NM_181688    |       |       |       | 1.355 | 0.512 |                                                                                                           |
| APOBEC3B     | * apolipoprotein B mRNA editing enzyme, catalytic polypeptide | NM_004900    | 1.355 | 1.176 |       |       |       |                                                                                                           |
| WSB2         | WD SOCS-box protein 2                                         | NM_018839    | 1.354 | 1.105 |       |       |       | Intracellular signaling cascade.                                                                          |
| tpcr24       | putative olfactory receptor                                   | X89671       | 1.354 | 0.836 |       |       |       |                                                                                                           |
| IL1F7        | interleukin 1 family, member 7 isoform 1 proprotein*          | NM_014439    |       |       | 1.354 | 0.379 |       | Immune response.                                                                                          |
| APXL         | apical protein of Xenopus-like                                | NM_001649    | 1.354 | 1.152 |       |       |       |                                                                                                           |
| TNFRSF13B    | tumor necrosis factor receptor 13B                            | NM_012452    |       |       | 1.353 | 0.411 |       | Immune response. Cell surface receptor linked signal transduction.                                        |
| DKFZp7611217 | hypothetical protein                                          | AL834260     |       |       | 1.353 | 0.585 |       |                                                                                                           |
| C20orf85     | chromosome 20 open reading frame 85                           | NM_178456    |       |       | 1.353 | 0.506 |       |                                                                                                           |
| N/A          | N/A                                                           | AK126956     | 1.352 | 0.036 |       |       |       |                                                                                                           |
| FLJ44082     | FLJ44082 protein                                              | NM_207416    | 1.351 | 0.816 |       |       |       |                                                                                                           |
| CDH16        | cadherin 16 precursor                                         | NM_004062    |       |       | 1.351 | 0.501 |       | Cell adhesion. Homophilic cell adhesion.                                                                  |
| KIAA0994     | KIAA0994 protein                                              | AB023211     |       |       | 1.35  | 0.576 |       |                                                                                                           |
| GGT2         | gamma-glutamyl transpeptidase small subunit                   | M30474       | 1.349 | 0.435 |       |       |       | Amino acid metabolism. Glutathione biosynthesis. Glutathione biosynthesis.                                |
| CDW52        | CDW52 antigen (CAMPATH-1 antigen)                             | BC000644     | 1.349 | 0.785 |       |       |       |                                                                                                           |
| PRKAG3       | AMP-activated protein kinase, non-catalytic gamma-3 subunit*  | NM_017431    |       |       | 1.348 | 0.592 |       | Generation of precursor metabolites and energy. Fatty acid biosynthesis. Protein kinase cascade.          |
| HSD3B1       | * hydroxy-delta-5-steroid dehydrogenase, 3 beta- and steroid  | NM_000862    | 1.348 | 0.705 |       |       |       | C21-steroid hormone biosynthesis.                                                                         |
| FLJ25084     | FLJ25084 protein                                              | BC031997     |       |       | 1.348 | 0.534 |       | Proteolysis and peptidolysis. Fatty acid biosynthesis.                                                    |
| ZNF495       | zinc finger protein 495                                       | NM_024303    | 1.347 | 1.05  |       |       |       | Regulation of transcription, DNA-dependent.                                                               |
| N/A          | PDE4C-426                                                     | U66347       |       |       | 1.347 | 0.611 |       | Signal transduction. Signal transduction.                                                                 |
| N/A          | N/A                                                           | AK125960     |       |       | 1.347 | 0.761 |       |                                                                                                           |
| SOX18        | SRY-box 18                                                    | NM_018419    |       |       | 1.346 | 0.702 |       | Regulation of transcription.                                                                              |
| N/A          | Unknown (protein for MGC:42059)                               | BC040177     | 1.201 | 1.436 | 1.346 | 0.608 |       | Protein amino acid phosphorylation. Signal transduction. Alcohol metabolism. Lipid metabolism.            |
| N/A          | N/A                                                           | AK129567     |       |       | 1.346 | 0.292 |       |                                                                                                           |
| h-erg        | putative potassium channel subunit                            | U04270       |       |       | 1.346 | 0.673 |       | Two-component signal transduction system. Cation transport. Potassium ion transport. Muscle contraction.  |
| OAS1         | * 2',5'-oligoadenylate synthetase 1 isoform E18*              | NM_016816    | 1.345 | 0.784 |       |       |       | Nucleobase, nucleoside, nucleotide and nucleic acid metabolism. Immune response. Response to virus.       |
| N/A          | PRO0386                                                       | AF116603     |       |       | 1.345 | 0.577 |       | Protein complex assembly. Epidermal growth factor receptor signaling pathway.                             |
| SLC12A5      | solute carrier family 12 member 5                             | NM_020708    |       |       | 1.344 | 0.419 |       | Potassium ion transport. Sodium ion transport. Chloride transport. Amino acid transport.                  |
| GPR40        | G protein-coupled receptor 40                                 | NM_005303    |       |       | 1.344 | 0.439 |       | Signal transduction. G-protein coupled receptor protein signaling pathway.                                |
| FLJ31300     | hypothetical protein FLJ31300                                 | NM_144639    |       |       | 1.344 | 0.355 |       |                                                                                                           |
| FLJ22573     | hypothetical protein FLJ22573                                 | NM_024660    | 1.344 | 0.999 |       |       |       |                                                                                                           |
| LMO3         | LIM domain only 3                                             | NM_018640    | 1.343 | 0.701 |       |       |       | Transcription. Regulation of transcription, DNA-dependent.                                                |
| CLEC1        | C-type lectin-like receptor-1                                 | BC067746     | 1.343 | 0.572 |       |       |       |                                                                                                           |
| KRTAP5-1     | keratin associated protein 5-1                                | NM_001005922 |       |       | 1.342 | 0.476 |       |                                                                                                           |
| GPR43        | G protein-coupled receptor 43                                 | NM_005306    |       |       | 1.342 | 0.467 |       | Signal transduction. G-protein coupled receptor protein signaling pathway.                                |
| TSGA13       | * testis specific, 13*                                        | NM_052933    | 1.341 | 0.609 |       |       |       |                                                                                                           |
| LEC1         | lectomedin-1 alpha                                            | AF104266     | 1.341 | 0.552 |       |       |       | Signal transduction. Neuropeptide signaling pathway.                                                      |
| N/A          | apolipoprotein B fragment                                     | X03324       | 1.34  | 0.551 |       |       |       |                                                                                                           |
| N/A          | Unknown (protein for MGC:45681)                               | BC033102     |       |       | 1.34  | 0.269 |       |                                                                                                           |
| N/A          | N/A                                                           | AK126330     |       |       | 1.339 | 0.741 |       |                                                                                                           |
| DKFZp434J212 | hypothetical protein                                          | AL137395     |       |       | 1.339 | 0.625 |       |                                                                                                           |
| N/A          | folate binding protein                                        | AF000380     |       |       | 1.338 | 0.488 |       | Folic acid transport.                                                                                     |
| GPRC5B       | * G protein-coupled receptor, family C, group 5, member B pre | NM_016235    | 1.338 | 0.496 |       |       |       | Signal transduction. G-protein coupled receptor protein signaling pathway. Visual perception.             |
| FLJ37964     | hypothetical protein FLJ37964                                 | NM_182578    |       |       | 1.338 | 0.663 |       | Protein amino acid phosphorylation. Signal transduction. Alcohol metabolism. Lipid metabolism.            |
| N/A          | N/A                                                           | AK130519     |       |       | 1.337 | 0.454 |       |                                                                                                           |
| N/A          | N/A                                                           | AK127293     |       |       | 1.337 | 0.688 |       | Cell-matrix adhesion.                                                                                     |
| LOC124220    | similar to common salivary protein 1                          | NM_145252    |       |       | 1.337 | 0.351 |       |                                                                                                           |
| CD58         | * CD58 antigen, (lymphocyte function-associated antigen 3)*   | NM_001779    | 1.337 | 0.844 |       |       |       | Cell-cell adhesion. Antimicrobial humoral response.                                                       |
| N/A          | N/A                                                           | AK097032     | 1.336 | 0.949 |       |       |       | Protein amino acid phosphorylation. Signal transduction. Alcohol metabolism. Lipid metabolism.            |
| GPR48        | G protein-coupled receptor 48                                 | NM_016490    | 1.336 | 1.619 |       |       |       | Signal transduction. G-protein coupled receptor protein signaling pathway.                                |
| GARNL4       | GTPase activating Rap/RanGAP domain-like 4                    | NM_015085    |       |       | 1.336 | 0.525 |       |                                                                                                           |
| CNR2         | cannabinoid receptor 2 (macrophage)                           | NM_001841    | 1.336 | 0.696 |       |       |       | Immune response. Signal transduction. G-protein signaling, coupled to cyclic nucleotide second messenger. |
| KRT3         | keratin 3                                                     | NM_057088    |       |       | 1.335 | 0.535 |       | Cytoskeleton organization and biogenesis.                                                                 |
| DEFB1        | * defensin, beta 1 preproprotein*                             | NM_005218    | 1.335 | 1.16  |       |       |       | Response to pest, pathogen or parasite. Defense response to bacteria. Innate immune response.             |
| ZFX4         | zinc finger homeodomain 4                                     | NM_024721    | 1.334 | 0.766 |       |       |       | Regulation of transcription, DNA-dependent.                                                               |
| TSC          | hypothetical protein FLJ20607                                 | NM_017899    |       |       | 1.334 | 0.553 |       |                                                                                                           |

|               |                                                                    |              |       |       |       |       |       |       |       |                                                                                                                                 |
|---------------|--------------------------------------------------------------------|--------------|-------|-------|-------|-------|-------|-------|-------|---------------------------------------------------------------------------------------------------------------------------------|
| N/A           | N/A                                                                | AK125730     |       |       |       |       |       | 1.334 | 0.548 |                                                                                                                                 |
| KIAA1220      | KIAA1220 protein                                                   | AB033046     |       |       | 1.334 | 0.719 |       |       |       | Ion transport. Synaptic transmission.                                                                                           |
| CSRFP3        | cysteine and glycine-rich protein 3                                | NM_003476    |       |       | 1.334 | 1.23  |       |       |       | Myogenesis. Cell differentiation.                                                                                               |
| CABP2         | calcium binding protein 2 isoform 1                                | NM_016366    |       |       |       |       | 1.334 | 0.661 |       | Signal transduction.                                                                                                            |
| ALOX12B       | arachidonate 12-lipoxygenase, 12R type*                            | NM_001139    |       |       |       |       | 1.334 | 0.354 |       | Electron transport. Lipid metabolism. Epidermis development. Leukotriene biosynthesis.                                          |
| N/A           | G protein-coupled receptor PGR19                                   | AY255595     |       |       | 1.333 | 1.24  |       |       |       | Signal transduction. Neuropeptide signaling pathway.                                                                            |
| N/A           | N/A                                                                | AK074614     |       |       | 1.332 | 0.533 |       |       |       |                                                                                                                                 |
| FLJ25006      | hypothetical protein FLJ25006                                      | NM_144610    |       |       |       |       | 1.332 | 0.851 |       | Protein amino acid phosphorylation.                                                                                             |
| C10orf99      | chromosome 10 open reading frame 99                                | NM_207373    |       |       |       |       | 1.332 | 0.479 |       |                                                                                                                                 |
| SNF1LK        | SNF1-like kinase                                                   | NM_173354    |       |       | 1.331 | 1.161 |       |       |       | Protein amino acid phosphorylation. Cell cycle. Protein kinase cascade. Regulation of mitotic cell cycle. Skeletal development. |
| NPR3          | natriuretic peptide receptor C/guanylate cyclase C (atrionatrium   | NM_000908    |       |       | 1.331 | 0.226 |       |       |       |                                                                                                                                 |
| NIN           | ninein isoform 2                                                   | NM_020921    |       |       | 1.331 | 0.917 |       |       |       |                                                                                                                                 |
| N/A           | Unknown (protein for MGC:71953)                                    | BC062691     |       |       | 1.331 | 0.695 |       |       |       |                                                                                                                                 |
| N/A           | N/A                                                                | AK127674     |       |       |       |       | 1.331 | 0.689 |       |                                                                                                                                 |
| N/A           | PRO2987                                                            | AF116719     |       |       | 1.331 | 0.798 |       |       |       | Transport. Oxygen transport.                                                                                                    |
| RFXANK        | regulatory factor X-associated ankyrin-containing protein isofo    | NM_003721    |       |       | 1.33  | 0.403 |       |       |       | Transcription. Regulation of transcription. DNA-dependent. Humoral immune response.                                             |
| KIAA1516      | KIAA1516 protein                                                   | AB040949     |       |       | 1.33  | 0.539 |       |       |       | Activation of MAPK. Activation of MAPK. Regulation of cell growth. Regulation of cell growth. Lipid m                           |
| N/A           | PRO1483                                                            | AF116635     |       |       | 1.329 | 0.599 |       |       |       |                                                                                                                                 |
| LCN1          | lipocalin 1 precursor                                              | NM_002297    | 2.098 | 1.061 |       |       | 1.329 | 0.429 |       | Proteolysis and peptidolysis. Transport. Sensory perception. Antimicrobial humoral response.                                    |
| STX7          | syntaxin 7                                                         | NM_003569    |       |       | 1.328 | 0.546 |       |       |       | Intracellular protein transport. Post-Golgi transport.                                                                          |
| GPR15         | G protein-coupled receptor 15                                      | NM_005290    | 1.94  | 2.1   | 1.328 | 0.443 |       |       |       | Signal transduction. G-protein coupled receptor protein signaling pathway.                                                      |
| FKSG61        | FKSG61                                                             | AF338190     |       |       |       |       | 1.328 | 0.476 |       |                                                                                                                                 |
| DNAH8         | truncated axonemal dynein heavy chain 8 isoform 4                  | AF527623     |       |       |       |       | 1.328 | 0.638 |       |                                                                                                                                 |
| SFRP5         | secreted frizzled-related protein 5                                | AF117758     |       |       |       |       | 1.327 | 0.56  |       | Wnt receptor signaling pathway. Cell differentiation.                                                                           |
| NAALADL1      | N-acetylated alpha-linked acidic dipeptidase-like 1                | NM_005468    |       |       |       |       | 1.327 | 0.364 |       | Proteolysis and peptidolysis.                                                                                                   |
| N/A           | Unknown (protein for IMAGE:4837157)                                | BC034593     |       |       | 1.326 | 0.554 |       |       |       |                                                                                                                                 |
| N/A           | ARVVP6125                                                          | AY358247     |       |       |       |       | 1.326 | 0.496 |       |                                                                                                                                 |
| N/A           | PP11646                                                            | AF370405     |       |       |       |       | 1.326 | 0.972 |       |                                                                                                                                 |
| LCE3E         | late cornified envelope 3E                                         | NM_178435    |       |       | 1.326 | 1.103 |       |       |       |                                                                                                                                 |
| FLJ32942      | hypothetical protein FLJ32942                                      | NM_144594    |       |       | 1.326 | 0.236 |       |       |       |                                                                                                                                 |
| N/A           | N/A                                                                | AK093227     |       |       | 1.325 | 1.039 |       |       |       |                                                                                                                                 |
| MAGEC3        | * melanoma antigen, family C, 3 protein isoform 1*                 | NM_138702    |       |       | 1.325 | 0.718 |       |       |       |                                                                                                                                 |
| KCNQ3         | potassium voltage-gated channel KQT-like protein 3                 | NM_004519    |       |       |       |       | 1.325 | 0.959 |       | Cation transport. Potassium ion transport. Synaptic transmission.                                                               |
| C20orf75      | chromosome 20 open reading frame 75                                | NM_152611    |       |       |       |       | 1.325 | 0.674 |       |                                                                                                                                 |
| OR2AG1        | * olfactory receptor, family 2, subfamily AG, member 1*            | NM_001004489 |       |       | 1.324 | 0.846 |       |       |       |                                                                                                                                 |
| N/A           | Unknown (protein for IMAGE:3935553)                                | BC013933     |       |       | 1.324 | 1.612 |       |       |       |                                                                                                                                 |
| N/A           | N/A                                                                | AK127462     |       |       | 1.324 | 0.301 |       |       |       |                                                                                                                                 |
| DAO           | D-amino-acid oxidase                                               | NM_001917    |       |       |       |       | 1.324 | 0.402 |       | Electron transport.                                                                                                             |
| PTCRA         | pre T-cell antigen receptor alpha                                  | NM_138296    |       |       | 1.323 | 0.32  |       |       |       |                                                                                                                                 |
| GPR68         | G protein-coupled receptor 68                                      | NM_003485    |       |       |       |       | 1.323 | 0.676 |       | Inflammatory response. Signal transduction. G-protein coupled receptor protein signaling pathway.                               |
| FOXP2         | forkhead box P2 isoform III                                        | NM_148900    |       |       | 1.323 | 0.676 |       |       |       |                                                                                                                                 |
| PPFIBP2       | PPFIBP2 protein                                                    | BC021714     |       |       | 1.322 | 0.482 |       |       |       | Cell communication.                                                                                                             |
| N/A           | N/A                                                                | AK075513     |       |       |       |       | 1.322 | 0.827 |       |                                                                                                                                 |
| KIAA1671      | KIAA1671 protein                                                   | AB051458     |       |       |       |       | 1.322 | 0.51  |       |                                                                                                                                 |
| DKFZp434M0519 | hypothetical protein cDNA DKFZp434M0519 (from clone DKFZ: AL137727 |              |       |       |       |       | 1.322 | 0.722 |       |                                                                                                                                 |
| BTLA          | B and T lymphocyte associated                                      | NM_181780    |       |       | 1.322 | 0.559 |       |       |       |                                                                                                                                 |
| MYL7          | myosin light chain 2a                                              | NM_021223    |       |       |       |       | 1.321 | 0.766 |       | Smooth muscle contraction. Muscle development. Actin filament-based movement.                                                   |
| GAPDS         | * glyceraldehyde-3-phosphate dehydrogenase, spermatogenic          | NM_014364    |       |       | 1.321 | 0.749 |       |       |       | Glucose metabolism. Glycolysis.                                                                                                 |
| FLJ00013      | FLJ00013 protein                                                   | AK024424     |       |       | 1.321 | 0.894 |       |       |       | Metabolism.                                                                                                                     |
| ELOVL4        | * elongation of very long chain fatty acids (FEN1/Elo2, SUR4/f     | NM_022726    |       |       | 1.321 | 0.646 |       |       |       | Fatty acid biosynthesis. Sensory perception. Visual perception.                                                                 |
| P5-1          | N/A                                                                | L06175       |       |       |       |       | 1.32  | 0.632 |       | Defense response.                                                                                                               |
| LRCH1         | leucine-rich repeats and calponin homology (CH) domain cont        | NM_015116    |       |       | 1.32  | 1.209 |       |       |       |                                                                                                                                 |
| FLJ35424      | hypothetical protein FLJ35424                                      | NM_173661    |       |       |       |       | 1.32  | 0.457 |       |                                                                                                                                 |
| DPM3          | dolichyl-phosphate mannosyltransferase polypeptide 3 isoform       | NM_018973    |       |       | 1.32  | 1.065 |       |       |       | Carbohydrate metabolism.                                                                                                        |
| N/A           | protein-serine/threonine kinase                                    | Z25433       |       |       | 1.319 | 1.22  |       |       |       | Regulation of cell cycle. Protein amino acid phosphorylation.                                                                   |
| N/A           | N/A                                                                | AK097495     |       |       | 1.319 | 0.862 |       |       |       |                                                                                                                                 |



|               |                                                                  |              |       |       |       |       |       |       |       |                                                                                                   |
|---------------|------------------------------------------------------------------|--------------|-------|-------|-------|-------|-------|-------|-------|---------------------------------------------------------------------------------------------------|
| GCK           | glucokinase isoform 1                                            | NM_000162    |       |       |       |       |       | 1.319 | 0.216 | Glycolysis.                                                                                       |
| FLJ31842      | hypothetical protein FLJ31842                                    | NM_152487    | 1.064 | 1.218 | 1.319 | 0.822 |       |       |       | Protein amino acid phosphorylation. Signal transduction. Alcohol metabolism. Lipid metabolism.    |
| ZFR           | zinc finger RNA binding protein                                  | NM_016107    |       |       | 1.318 | 0.262 |       |       |       |                                                                                                   |
| UOCR          | ubiquinol-cytochrome c reductase (6.4kD) subunit                 | NM_006830    |       |       | 1.318 | 1.029 |       |       |       | Electron transport. Transport.                                                                    |
| MYO5A         | * myosin VA (heavy polypeptide 12, myosin)*                      | NM_000259    |       |       | 1.318 | 1.201 |       |       |       | Transport. Actin filament-based movement.                                                         |
| N/A           | N/A                                                              | BX247965     |       |       | 1.317 | 0.261 |       |       |       |                                                                                                   |
| N/A           | N/A                                                              | AK127005     |       |       | 1.317 | 0.265 |       |       |       | Carbohydrate metabolism. N-linked glycosylation. Oligosaccharide metabolism.                      |
| KIAA1568      | KIAA1568 protein                                                 | AB046788     |       |       | 1.317 | 0.989 |       |       |       | Ureteric bud development. Chemotaxis. Cell adhesion. Homophilic cell adhesion. Brain development. |
| ERN2          | endoplasmic reticulum to nucleus signalling 2                    | NM_033266    |       |       |       |       | 1.317 | 0.333 |       | Electron transport. Regulation of transcription, DNA-dependent. mRNA processing.                  |
| APG3L         | APG3L protein                                                    | BC002830     |       |       | 1.317 | 0.56  |       |       |       | Autophagy. Protein transport. Protein ubiquitination.                                             |
| PTPNS1L2      | protein tyrosine phosphatase, non-receptor type substrate 1-lik  | NM_178460    |       |       |       |       | 1.316 | 0.415 |       |                                                                                                   |
| P53AIP1       | p53-regulated apoptosis-inducing protein 1                       | NM_022112    |       |       |       |       | 1.316 | 0.276 |       | Apoptosis.                                                                                        |
| N/A           | N/A                                                              | AK057813     |       |       |       |       | 1.316 | 0.506 |       | Proteolysis and peptidolysis. Fatty acid biosynthesis.                                            |
| STCH          | * stress 70 protein chaperone, microsome-associated, 60kDa       | NM_006948    |       |       | 1.315 | 0.956 |       |       |       |                                                                                                   |
| MGC35361      | hypothetical protein MGC35361                                    | NM_147194    |       |       | 1.315 | 0.475 |       |       |       |                                                                                                   |
| N/A           | PROO195                                                          | AF090901     |       |       | 1.314 | 0.759 |       |       |       | Nucleobase, nucleoside, nucleotide and nucleic acid metabolism. Response to toxin.                |
| FLJ25811      | FLJ25811 protein                                                 | NM_001005214 |       |       | 1.313 | 0.616 |       |       |       |                                                                                                   |
| FLJ36116      | FLJ36116 protein                                                 | NM_207399    |       |       |       |       | 1.312 | 0.531 |       |                                                                                                   |
| FAT2          | FAT tumor suppressor 2 precursor                                 | NM_001447    |       |       |       |       | 1.312 | 0.624 |       | Cell adhesion. Homophilic cell adhesion.                                                          |
| DYSF          | dysferlin                                                        | NM_003494    |       |       |       |       | 1.312 | 0.677 |       | Muscle contraction.                                                                               |
| DKFZp434H0735 | hypothetical protein                                             | AL117509     |       |       |       |       | 1.312 | 0.454 |       |                                                                                                   |
| PEPP-2        | homeobox protein from AL590526                                   | NM_032498    |       |       | 1.311 | 0.814 |       |       |       | Regulation of transcription, DNA-dependent.                                                       |
| N/A           | N/A                                                              | U52830       |       |       | 1.311 | 0.938 |       |       |       |                                                                                                   |
| N/A           | BCL2 protein                                                     | AF401211     |       |       | 1.311 | 0.729 |       |       |       |                                                                                                   |
| N/A           | PROO352                                                          | AF090920     |       |       |       |       | 1.311 | 0.274 |       | Cell communication.                                                                               |
| MGC35450      | hypothetical protein MGC35450                                    | BC065202     |       |       | 1.311 | 0.538 |       |       |       |                                                                                                   |
| LOC161577     | LOC161577 protein                                                | NM_198524    |       |       | 1.311 | 0.364 |       |       |       |                                                                                                   |
| FLJ40457      | hypothetical protein FLJ40457                                    | NM_173628    |       |       |       |       | 1.311 | 0.684 |       |                                                                                                   |
| FLJ32833      | hypothetical protein FLJ32833                                    | NM_152488    |       |       | 1.311 | 0.289 |       |       |       |                                                                                                   |
| FLJ25084      | hypothetical protein FLJ25084                                    | NM_152792    |       |       |       |       | 1.311 | 0.465 |       | Proteolysis and peptidolysis. Fatty acid biosynthesis.                                            |
| D-GPCR        | Dresden-G-protein-coupled receptor                               | NM_152430    |       |       | 1.311 | 0.507 |       |       |       | Signal transduction. G-protein coupled receptor protein signaling pathway. Perception of smell.   |
| ABHD1         | alpha/beta hydrolase domain containing protein 1 isoform 1       | NM_032604    |       |       | 1.311 | 0.671 |       |       |       |                                                                                                   |
| N/A           | N/A                                                              | AK128173     |       |       | 1.31  | 0.801 |       |       |       | Protein amino acid phosphorylation.                                                               |
| PLAC8         | PLAC8 protein                                                    | BC012205     |       |       | 1.309 | 0.898 |       |       |       |                                                                                                   |
| N/A           | Similar to potassium inwardly-rectifying channel, subfamily J, n | BC040617     |       |       |       |       | 1.309 | 0.643 |       | Ion transport. Potassium ion transport.                                                           |
| MIP           | major intrinsic protein of lens fiber                            | NM_012064    |       |       |       |       | 1.309 | 0.585 |       | Transport. Cell-cell signaling. Sensory perception. Visual perception.                            |
| CD34          | CD34 antigen                                                     | NM_001773    |       |       |       |       | 1.309 | 0.493 |       | Cell adhesion.                                                                                    |
| ACF           | apobec-1 complementation factor isoform 3                        | NM_138933    |       |       | 1.309 | 0.712 |       |       |       | MRNA editing. Protein stabilization.                                                              |
| N/A           | Unknown (protein for IMAGE:5200632)                              | BC027847     | 1.047 | 1.083 |       |       | 1.308 | 0.75  |       |                                                                                                   |
| N/A           | N/A                                                              | AK096041     |       |       | 1.308 | 0.974 |       |       |       | Protein amino acid phosphorylation. Signal transduction. Alcohol metabolism. Lipid metabolism.    |
| CALML3        | calmodulin-like 3                                                | NM_005185    |       |       |       |       | 1.308 | 0.491 |       |                                                                                                   |
| BTN1A1        | * butyrophilin, subfamily 1, member A1*                          | NM_001732    |       |       | 1.308 | 1.254 |       |       |       |                                                                                                   |
| ARMC4         | armadillo repeat containing 4                                    | NM_018076    |       |       | 1.308 | 0.623 |       |       |       | Mitotic chromosome condensation. Cell adhesion.                                                   |
| N/A           | N/A                                                              | AK128528     |       |       |       |       | 1.307 | 0.816 |       |                                                                                                   |
| N/A           | N/A                                                              | AK023180     |       |       | 1.307 | 1.08  |       |       |       |                                                                                                   |
| KRTHB6        | keratin, hair, basic, 6*                                         | NM_002284    |       |       |       |       | 1.307 | 0.658 |       | Cytoskeleton organization and biogenesis.                                                         |
| FLJ00317      | FLJ00317 protein                                                 | AK131095     | 1.006 | 1.272 |       |       | 1.307 | 0.317 |       | Proteolysis and peptidolysis. Integrin-mediated signaling pathway.                                |
| SMPDL3B       | acid sphingomyelinase-like phosphodiesterase 3B                  | NM_014474    |       |       |       |       | 1.306 | 0.327 |       | Carbohydrate metabolism.                                                                          |
| KIAA1717      | KIAA1717 protein                                                 | AB051504     |       |       | 1.306 | 0.959 |       |       |       |                                                                                                   |
| NKPD1         | NTPase, KAP family P-loop domain containing 1*                   | NM_196478    |       |       |       |       | 1.305 | 0.843 |       |                                                                                                   |
| N/A           | N/A                                                              | AK128663     |       |       |       |       | 1.305 | 0.291 |       |                                                                                                   |
| KIAA0527      | KIAA0527 protein                                                 | AB011099     |       |       | 1.305 | 1.099 |       |       |       | Cell adhesion.                                                                                    |
| GPR61         | G protein-coupled receptor 61                                    | NM_031936    |       |       |       |       | 1.305 | 0.349 |       | Signal transduction. G-protein coupled receptor protein signaling pathway.                        |
| IL26          | interleukin 26 precursor                                         | NM_018402    |       |       | 1.304 | 0.837 |       |       |       | Immune response. Cell-cell signaling. Antimicrobial humoral response.                             |
| GPR126        | G protein-coupled receptor 126 beta 1                            | NM_198569    |       |       | 1.304 | 0.827 |       |       |       | Signal transduction. Neuropeptide signaling pathway.                                              |
| CKLF5         | chemokine-like factor superfamily 5 isoform b                    | NM_181618    |       |       |       |       | 1.304 | 0.335 |       | Chemotaxis. Sensory perception.                                                                   |

|               |                                                                |           |       |       |       |       |       |       |                                                                                                                              |
|---------------|----------------------------------------------------------------|-----------|-------|-------|-------|-------|-------|-------|------------------------------------------------------------------------------------------------------------------------------|
| N/A           | Similar to RIKEN cDNA 1700074P13 gene                          | BC047233  | 1.302 | 0.656 |       |       |       |       |                                                                                                                              |
| N/A           | N/A                                                            | AK094329  | 1.302 | 0.652 |       |       |       |       | Protein amino acid phosphorylation. Signal transduction. Alcohol metabolism. Lipid metabolism.                               |
| N/A           | N/A                                                            | AK090752  | 1.302 | 1.199 |       |       |       |       | Protein amino acid phosphorylation. Signal transduction. Spermatid cell development. Wnt receptor signaling pathway.         |
| GPR120        | G protein-coupled receptor 120                                 | NM_181745 |       |       |       | 1.302 | 0.259 |       |                                                                                                                              |
| ENPEP         | glutamyl aminopeptidase (aminopeptidase A)                     | NM_001977 | 1.302 | 0.721 |       |       |       |       | Proteolysis and peptidolysis. Cell-cell signaling. Cell proliferation.                                                       |
| N/A           | N/A                                                            | AK126211  | 1.301 | 0.543 |       |       |       |       | Mo-molybdopterin cofactor biosynthesis. Sulfur metabolism.                                                                   |
| N/A           | PRO2796                                                        | AF116714  |       |       | 1.301 | 0.014 |       |       |                                                                                                                              |
| HOMER2        | homer 2 isoform 2                                              | NM_199330 | 1.301 | 0.822 |       |       |       |       | Metabotropic glutamate receptor signaling pathway.                                                                           |
| CREG1         | cellular repressor of E1A-stimulated genes                     | NM_003851 | 1.301 | 0.628 |       |       |       |       | Regulation of cell growth. Regulation of transcription from RNA polymerase II promoter. Development. Cell proliferation.     |
| PARVG         | parvin, gamma*                                                 | BC034406  |       |       |       |       | 1.3   | 0.453 | Cell-matrix adhesion.                                                                                                        |
| N/A           | Wnt4                                                           | AY358947  | 1.3   | 0.97  |       |       |       |       | Frizzled-2 signaling pathway. Cell-cell signaling. Development.                                                              |
| LMX1A         | LIM homeobox transcription factor 1, alpha isoform 6A*         | NM_177398 |       |       |       |       | 1.3   | 0.668 | Regulation of transcription, DNA-dependent. Development                                                                      |
| MUC7          | * mucin 7, salivary"                                           | NM_152291 |       |       | 1.299 | 0.455 |       |       |                                                                                                                              |
| CDX4          | caudal type homeo box transcription factor 4                   | NM_005193 |       |       |       |       | 1.299 | 0.52  | Regulation of transcription, DNA-dependent. Development.                                                                     |
| SLC35A5       | * solute carrier family 35, member A5*                         | NM_017945 | 1.298 | 0.799 |       |       |       |       | Nucleotide-sugar transport.                                                                                                  |
| HS747E2A      | hypothetical protein HS747E2A                                  | NM_015370 |       |       |       |       | 1.298 | 0.476 |                                                                                                                              |
| GRIN3A        | glutamate receptor, ionotropic, N-methyl-D-aspartate 3A*       | NM_133445 |       |       |       |       | 1.298 | 0.407 | Protein biosynthesis. Ion transport. Synaptic transmission.                                                                  |
| TRPA1         | ankyrin-like protein 1                                         | NM_007332 | 1.297 | 0.656 |       |       |       |       | Cation transport. Sensory perception.                                                                                        |
| FOLR1         | folate receptor 1 precursor                                    | NM_016730 |       |       |       |       | 1.297 | 0.384 | Receptor mediated endocytosis. Folic acid transport.                                                                         |
| DLNB26        | N/A                                                            | AB094095  | 1.297 | 1.166 |       |       |       |       |                                                                                                                              |
| C6orf60       | chromosome 6 open reading frame 60                             | NM_024581 | 1.297 | 0.741 |       |       |       |       |                                                                                                                              |
| KIAA1984      | KIAA1984 protein                                               | AB075864  |       |       |       |       | 1.296 | 0.629 | Protein amino acid phosphorylation. Signal transduction. Alcohol metabolism. Lipid metabolism.                               |
| KIAA0090      | N/A                                                            | D42044    | 1.296 | 1.047 |       |       |       |       |                                                                                                                              |
| IL27RA        | class 1 cytokine receptor                                      | NM_004843 |       |       |       |       | 1.296 | 0.843 |                                                                                                                              |
| N/A           | Unknown (protein for IMAGE:4825733)                            | BC032027  |       |       |       |       | 1.295 | 0.755 |                                                                                                                              |
| GDF11         | growth differentiation factor 11                               | NM_005811 | 1.295 | 0.61  |       |       |       |       | Skeletal development. Neurogenesis. Mesoderm development.                                                                    |
| PEG1/MEST     | N/A                                                            | D87367    | 1.294 | 0.698 |       |       |       |       | Xenobiotic metabolism. Mesoderm development.                                                                                 |
| FKSG62        | FKSG62                                                         | AF338191  | 2.163 | 1.116 | 1.294 | 1.183 |       |       |                                                                                                                              |
| CD3E          | CD3E antigen, epsilon polypeptide (TIT3 complex)*              | NM_000733 |       |       |       |       | 1.294 | 0.7   | Signal complex formation. G-protein coupled receptor protein signaling pathway. Positive regulation of T-cell proliferation. |
| N/A           | N/A                                                            | AK027480  | 1.293 | 0.519 |       |       |       |       | Regulation of transcription, DNA-dependent.                                                                                  |
| DKFZp547J2313 | hypothetical protein                                           | AL512688  |       |       |       |       | 1.293 | 0.41  | Fatty acid metabolism. Transport. Neurogenesis. Negative regulation of cell proliferation.                                   |
| SMAD3         | * MAD, mothers against decapentaplegic homolog 3*              | NM_005902 | 1.292 | 1.173 |       |       |       |       | Transcription. Transforming growth factor beta receptor signal.                                                              |
| N/A           | N/A                                                            | AK026266  | 1.292 | 0.876 |       |       |       |       |                                                                                                                              |
| ORM1          | orosomucoid 1 precursor                                        | NM_000607 |       |       |       |       | 1.291 | 0.279 | Transport. Acute-phase response. Inflammatory response.                                                                      |
| N/A           | N/A                                                            | AK130172  |       |       |       |       | 1.291 | 0.354 |                                                                                                                              |
| MYLIP         | myosin regulatory light chain interacting protein              | NM_013262 | 1.291 | 0.467 |       |       |       |       | Cell motility. Neurogenesis. Protein ubiquitination.                                                                         |
| MRPL22        | mitochondrial ribosomal protein L22                            | NM_014180 | 1.291 | 0.48  |       |       |       |       | Protein biosynthesis.                                                                                                        |
| C9orf138      | chromosome 9 open reading frame 138                            | NM_153707 | 1.291 | 0.884 |       |       |       |       |                                                                                                                              |
| AQP1          | aquaporin 1                                                    | NM_198098 | 1.023 | 0.567 |       |       | 1.291 | 0.284 | Transport. Water transport. Excretion.                                                                                       |
| TU3A          | downregulated in renal cell carcinoma                          | NM_007177 |       |       |       |       | 1.29  | 0.474 | Regulation of cell growth.                                                                                                   |
| N/A           | CTAGE-3 protein                                                | AF338231  |       |       |       |       | 1.29  | 0.305 | RNA processing.                                                                                                              |
| MGC40178      | hypothetical protein MGC40178                                  | NM_152325 |       |       |       |       | 1.29  | 0.505 |                                                                                                                              |
| N/A           | N/A                                                            | AK097908  | 1.289 | 0.773 |       |       |       |       |                                                                                                                              |
| N/A           | N/A                                                            | AK093450  |       |       |       |       | 1.289 | 0.512 |                                                                                                                              |
| IL15          | interleukin 15 isoform 1 precursor                             | NM_172174 | 1.289 | 1.307 |       |       |       |       | Immune response. Signal transduction. Cell-cell signaling. Positive regulation of cell proliferation.                        |
| CD1E          | leukocyte differentiation antigen                              | X79518    |       |       |       |       | 1.289 | 0.532 | Immune response.                                                                                                             |
| SDCCAG33      | serologically defined colon cancer antigen 33                  | NM_005786 | 1.288 | 0.614 |       |       |       |       | Regulation of transcription, DNA-dependent.                                                                                  |
| N/A           | HSA250839                                                      | AY358353  | 4.152 | 1.227 | 1.288 | 1.169 |       |       |                                                                                                                              |
| N/A           | N/A                                                            | AK123899  |       |       |       |       | 1.288 | 0.583 |                                                                                                                              |
| N/A           | N/A                                                            | AK054946  |       |       |       |       | 1.288 | 0.569 |                                                                                                                              |
| TGM6          | transglutaminase 6                                             | NM_198994 | 1.287 | 0.34  |       |       |       |       | Peptide cross-linking.                                                                                                       |
| RFPL1         | ret finger protein-like 1                                      | NM_021026 | 1.287 | 0.721 |       |       |       |       | Protein ubiquitination.                                                                                                      |
| GUCA1A        | guanylate cyclase activator 1A (retina)                        | NM_000409 |       |       |       |       | 1.286 | 0.441 | Signal transduction. Sensory perception. Visual perception.                                                                  |
| PNUTL2        | peanut-like 2 isoform 4                                        | NM_080417 | 1.285 | 0.521 |       |       |       |       | Cytokinesis. Cell cycle. Regulation of apoptosis.                                                                            |
| LOC339742     | LOC339742 protein                                              | BC045732  | 1.285 | 0.489 |       |       |       |       |                                                                                                                              |
| SULT1A1       | sulfotransferase family, cytosolic, 1A, phenol-prefering, memb | NM_177534 |       |       |       |       | 1.284 | 0.406 | Catecholamine metabolism. Lipid metabolism. Steroid metabolism. Amine metabolism.                                            |

|               |                                                                    |              |       |       |       |       |       |                                                                                                       |  |
|---------------|--------------------------------------------------------------------|--------------|-------|-------|-------|-------|-------|-------------------------------------------------------------------------------------------------------|--|
| OR52B2        | * olfactory receptor, family 52, subfamily B, member 2*            | NM_001004052 | 1.284 | 0.545 |       |       |       |                                                                                                       |  |
| N/A           | N/A                                                                | AK130265     |       |       |       | 1.284 | 0.308 |                                                                                                       |  |
| LOC387646     | hypothetical LOC387646                                             | NM_001006604 |       |       |       | 1.284 | 0.635 |                                                                                                       |  |
| CGB5          | N/A                                                                | NM_033043    |       |       |       | 1.284 | 0.405 | Signal transduction. Cell-cell signaling. Sex determination. Male gonad development.                  |  |
| TFR2          | transferrin receptor 2                                             | NM_003227    | 1.283 | 0.819 |       |       |       | Proteolysis and peptidolysis. Iron ion transport.                                                     |  |
| CHRNA4        | cholinergic receptor, nicotinic, alpha polypeptide 4 precursor*    | NM_000744    |       |       |       | 1.283 | 0.691 | Ion transport. Signal transduction. Synaptic transmission. Neurogenesis.                              |  |
| CCR2          | chemokine (C-C motif) receptor 2 isoform A                         | NM_000647    |       |       |       | 1.283 | 0.327 | Chemotaxis. Inflammatory response. Cellular defense response. Signal transduction.                    |  |
| AGTRL1        | angiotensin II receptor-like 1                                     | NM_005161    |       |       |       | 1.283 | 0.671 | Signal transduction. G-protein coupled receptor protein signaling pathway.                            |  |
| TFG           | TRK-fused gene                                                     | NM_006070    | 1.282 | 1.043 |       |       |       | Protein amino acid phosphorylation. Positive regulation of I-kappaB kinase/NF-kappaB cascade.         |  |
| NB1           | NB1 glycoprotein                                                   | AJ310433     |       |       |       | 1.282 | 0.469 |                                                                                                       |  |
| N/A           | Unknown (protein for IMAGE:4907098)                                | BC025357     |       |       |       | 1.282 | 0.675 | Protein amino acid phosphorylation. Signal transduction. Alcohol metabolism. Lipid metabolism.        |  |
| N/A           | unknown                                                            | AY129023     |       |       |       | 1.282 | 0.521 |                                                                                                       |  |
| DEFB129       | beta defensin 129 precursor                                        | NM_080831    | 1.282 | 1.22  |       |       |       | Defense response to bacteria.                                                                         |  |
| MGC26816      | hypothetical protein MGC26816                                      | NM_152613    |       |       |       | 1.281 | 0.597 |                                                                                                       |  |
| PCDHX         | protocadherin                                                      | AJ564947     | 1.28  | 1.007 |       |       |       | Cell adhesion. Homophilic cell adhesion.                                                              |  |
| N/A           | N/A                                                                | AK126655     | 1.28  | 0.818 |       |       |       | Protein amino acid phosphorylation. Signal transduction. Alcohol metabolism. Lipid metabolism.        |  |
| N/A           | N/A                                                                | AK057649     | 1.28  | 0.47  |       |       |       | Amino acid metabolism. Biosynthesis.                                                                  |  |
| FUT6          | * fucosyltransferase 6 (alpha (1,3) fucosyltransferase)*           | NM_000150    | 1.28  | 0.513 |       |       |       | Protein amino acid phosphorylation. Signal transduction. Alcohol metabolism. Lipid metabolism.        |  |
| DKFZp686H1615 | hypothetical protein cDNA DKFZp686H1615 (from clone DKFZ1 BX537882 |              | 1.28  | 0.826 |       |       |       |                                                                                                       |  |
| DKFZp547K059  | hypothetical protein                                               | AL713786     |       |       |       | 1.28  | 0.534 |                                                                                                       |  |
| ali           | alivin 1                                                           | AB079074     | 1.28  | 1.25  |       |       |       |                                                                                                       |  |
| ACVR1C        | * activin A receptor, type IC*                                     | NM_145259    | 1.28  | 0.975 |       |       |       |                                                                                                       |  |
| N/A           | Similar to LOC149651                                               | BC025345     |       |       |       | 1.279 | 0.362 |                                                                                                       |  |
| N/A           | N/A                                                                | AK055758     |       |       |       | 1.279 | 0.418 | Multidrug transport.                                                                                  |  |
| MGC26963      | hypothetical protein MGC26963                                      | NM_152621    | 1.279 | 0.309 |       |       |       | Lipid metabolism. Sphingolipid metabolism. Sphingomyelin biosynthesis.                                |  |
| CGA           | * glycoprotein hormones, alpha polypeptide, precursor*             | BC020782     | 1.279 | 0.589 |       |       |       | Signal transduction. Cell-cell signaling.                                                             |  |
| PABPC3        | * poly(A) binding protein, cytoplasmic 3*                          | NM_030979    | 1.278 | 0.51  |       |       |       | MRNA metabolism.                                                                                      |  |
| N/A           | Unknown (protein for IMAGE:5242623)                                | BC028099     | 1.278 | 0.864 |       |       |       |                                                                                                       |  |
| N/A           | N/A                                                                | AK130278     |       |       |       | 1.278 | 1.054 |                                                                                                       |  |
| EDIL3         | EGF-like repeats and discoidin I-like domains-containing protel    | NM_005711    | 1.278 | 0.824 |       |       |       | Cell adhesion. Development.                                                                           |  |
| MGC10233      | hypothetical protein MGC10233                                      | NM_152715    | 1.277 | 0.937 |       |       |       | Protein modification.                                                                                 |  |
| KIAA0735      | KIAA0735 protein                                                   | AB018278     | 1.277 | 0.483 |       |       |       | Neurotransmitter transport.                                                                           |  |
| RPP30         | ribonuclease P (30kD)                                              | NM_006413    | 1.276 | 0.78  |       |       |       | tRNA processing.                                                                                      |  |
| PTPRN         | protein tyrosine phosphatase, receptor type, N precursor*          | NM_002846    |       |       |       | 1.276 | 0.643 | Protein amino acid dephosphorylation.                                                                 |  |
| N/A           | N/A                                                                | AK126053     |       |       |       | 1.276 | 0.597 |                                                                                                       |  |
| KRT14         | keratin 14                                                         | NM_000526    |       |       |       | 1.276 | 0.481 | Epidermis development.                                                                                |  |
| FLJ26850      | FLJ26850 protein                                                   | NM_001001687 | 1.262 | 1.12  | 1.276 | 0.478 |       |                                                                                                       |  |
| N/A           | Unknown (protein for IMAGE:3162384)                                | BC000537     |       |       |       | 1.275 | 0.657 | Electron transport. Protein folding. Protein-ER retention.                                            |  |
| TPTEps1       | TPTEps1 protein                                                    | BC041842     |       |       |       | 1.274 | 0.458 |                                                                                                       |  |
| FRG2          | FSDH region gene 2 protein                                         | NM_001005217 |       |       |       | 1.274 | 0.446 |                                                                                                       |  |
| N/A           | N/A                                                                | AK126917     |       |       |       | 1.272 | 0.255 | Electron transport.                                                                                   |  |
| N/A           | N/A                                                                | AK123224     | 1.599 | 1.455 |       | 1.272 | 0.242 |                                                                                                       |  |
| HS3ST1        | heparan sulfate D-glucosaminyl 3-O-sulfotransferase 1 precurs      | NM_005114    |       |       |       | 1.272 | 0.799 |                                                                                                       |  |
| GABRP         | * gamma-aminobutyric acid (GABA) A receptor, pi*                   | NM_014211    | 1.272 | 0.663 |       |       |       | Ion transport. Synaptic transmission.                                                                 |  |
| FLJ10178      | hypothetical protein FLJ10178                                      | BC011483     | 1.272 | 0.719 |       |       |       |                                                                                                       |  |
| TMEM26        | transmembrane protein 26                                           | NM_178505    | 1.271 | 0.748 |       |       |       |                                                                                                       |  |
| PYCARD        | PYD and CARD domain containing isoform a                           | NM_013258    | 1.271 | 0.522 |       |       |       | Induction of apoptosis. Caspase activation. Cell cycle. Signal transduction. Regulation of apoptosis. |  |
| N/A           | LHLC1946                                                           | AY358228     |       |       |       | 1.27  | 0.604 |                                                                                                       |  |
| N/A           | N/A                                                                | AK023435     |       |       | 1.27  | 0.48  |       |                                                                                                       |  |
| GALC          | galactosylceramidase precursor                                     | NM_000153    |       |       | 1.27  | 0.511 |       | Carbohydrate metabolism. Galactosylceramide catabolism.                                               |  |
| FLJ39531      | FLJ39531 protein                                                   | NM_207445    | 1.27  | 0.837 |       |       |       |                                                                                                       |  |
| N/A           | N/A                                                                | AK095606     |       |       |       | 1.269 | 0.505 | Development.                                                                                          |  |
| SULT1A2       | sulfotransferase family, cytosolic, 1A, phenol-prefering, memb     | NM_177528    |       |       |       | 1.268 | 0.418 | Catecholamine metabolism. Lipid metabolism. Steroid metabolism. Amine metabolism.                     |  |
| N/A           | zinc finger protein                                                | AF024694     | 1.268 | 0.699 |       |       |       |                                                                                                       |  |
| K6IRS3        | keratin 6 irs3                                                     | NM_175068    |       |       |       | 1.268 | 0.453 | Ectoderm development.                                                                                 |  |
| FLJ35843      | hypothetical protein FLJ35843                                      | NM_152591    |       |       |       | 1.268 | 0.697 |                                                                                                       |  |

|              |                                                                   |              |       |       |       |       |  |  |                                                                                                                               |
|--------------|-------------------------------------------------------------------|--------------|-------|-------|-------|-------|--|--|-------------------------------------------------------------------------------------------------------------------------------|
| TNFSF13B     | * tumor necrosis factor (ligand) superfamily, member 13b*         | NM_006573    | 1.267 | 0.69  |       |       |  |  | Immune response. Signal transduction. Cell proliferation. Positive regulation of cell proliferation.                          |
| SLC24A2      | * solute carrier family 24 (sodium/potassium/calcium exchange     | NM_020344    | 1.267 | 0.68  |       |       |  |  | Potassium ion transport. Sodium ion transport. Calcium ion transport. Sensory perception.                                     |
| GLT25D2      | glycosyltransferase 25 domain containing 2                        | NM_015101    | 1.267 | 0.303 |       |       |  |  | Lipopolysaccharide biosynthesis.                                                                                              |
| FLJ32855     | FLJ32855 protein                                                  | BC031684     | 1.267 | 1.016 |       |       |  |  |                                                                                                                               |
| C9orf37      | chromosome 9 open reading frame 37                                | NM_032937    | 1.267 | 0.962 |       |       |  |  |                                                                                                                               |
| YPEL2        | yippee-like 2                                                     | NM_001005404 | 1.266 | 0.807 |       |       |  |  |                                                                                                                               |
| KIAA1713     | KIAA1713 protein                                                  | AB051500     | 1.265 | 0.71  |       |       |  |  |                                                                                                                               |
| HOXA4        | homeobox protein A4                                               | NM_002141    | 1.264 | 1.151 |       |       |  |  | Regulation of transcription, DNA-dependent. Morphogenesis.                                                                    |
| FMO5         | flavin containing monooxygenase 5                                 | NM_001461    | 1.264 | 0.302 |       |       |  |  | Electron transport.                                                                                                           |
| FBXL21       | FBXL21 protein                                                    | BC044938     | 1.264 | 0.536 |       |       |  |  |                                                                                                                               |
| CALCLL       | calcitonin receptor-like                                          | NM_005795    | 1.041 | 0.8   | 1.264 | 0.866 |  |  | Signal transduction. G-protein signaling, coupled to cyclic nucleotide second messenger.                                      |
| VWF          | von Willebrand factor precursor                                   | NM_000552    |       |       | 1.263 | 0.463 |  |  | Cell adhesion. Response to wounding. Platelet activation.                                                                     |
| OR9A2        | * olfactory receptor, family 9, subfamily A, member 2*            | NM_001001658 | 1.263 | 0.916 |       |       |  |  |                                                                                                                               |
| NMUR1        | neuromedin U receptor 1                                           | NM_006056    |       |       | 1.263 | 0.353 |  |  | Calcium ion transport. Smooth muscle contraction. G-protein signaling, coupled to IP3 second messenger                        |
| N/A          |                                                                   | U87591       | 1.041 | 0.875 | 1.263 | 0.222 |  |  |                                                                                                                               |
| KRT6E        | keratin 6 isoform K6e                                             | NM_173086    |       |       | 1.263 | 0.379 |  |  | Ectoderm development.                                                                                                         |
| IRAK3        | interleukin-1 receptor-associated kinase 3                        | BC057800     | 1.263 | 0.652 |       |       |  |  | Protein amino acid phosphorylation. Signal transduction. Cytokine and chemokine mediated signaling pathway.                   |
| IQCF2        | IQ motif containing F2                                            | NM_203424    |       |       | 1.263 | 0.259 |  |  |                                                                                                                               |
| FLJ30313     | hypothetical protein FLJ30313                                     | NM_152757    |       |       | 1.263 | 0.428 |  |  |                                                                                                                               |
| IL1F5        | interleukin 1 family, member 5*                                   | NM_012275    |       |       | 1.262 | 0.655 |  |  | Inflammatory response.                                                                                                        |
| C10orf13     | hypothetical protein MGC39320                                     | NM_152429    | 1.262 | 0.751 |       |       |  |  |                                                                                                                               |
| HTR3C        | 5-hydroxytryptamine receptor 3 subunit C                          | NM_130770    | 1.261 | 0.426 |       |       |  |  |                                                                                                                               |
| ACVRL1       | activin A receptor type II-like 1                                 | NM_000020    | 1.514 | 1.37  | 1.261 | 1.158 |  |  | Protein amino acid phosphorylation. Transforming growth factor beta receptor signaling pathway.                               |
| MMP15        | matrix metalloproteinase 15 preproprotein                         | NM_002428    |       |       | 1.26  | 0.377 |  |  | Protein modification. Proteolysis and peptidolysis.                                                                           |
| erg-3        | Erg-3                                                             | S68130       | 1.26  | 0.623 |       |       |  |  |                                                                                                                               |
| ALDH1A3      | aldehyde dehydrogenase 1A3                                        | NM_000693    | 1.26  | 1.077 |       |       |  |  | Alcohol metabolism. Lipid metabolism.                                                                                         |
| LOC149830    | M8 protein                                                        | NM_177549    |       |       | 1.259 | 0.718 |  |  |                                                                                                                               |
| KIAA1509     | KIAA1509 protein                                                  | AB040942     | 1.259 | 0.613 |       |       |  |  |                                                                                                                               |
| DKFZp547J226 | hypothetical protein                                              | AL834457     |       |       | 1.259 | 0.93  |  |  |                                                                                                                               |
| RAB3IL1      | RAB3A interacting protein (rab3n)-like 1                          | NM_013401    | 1.257 | 0.775 |       |       |  |  |                                                                                                                               |
| PRM2         | protamine 2                                                       | NM_002762    | 1.257 | 0.61  |       |       |  |  |                                                                                                                               |
| NHLH1        | nescient helix loop helix 1                                       | NM_005598    |       |       | 1.257 | 0.272 |  |  | DNA packaging. Chromosome organization and biogenesis. Mitotic chromosome condensation. Spermatogenesis.                      |
| FOXP4        | forkhead box P4                                                   | NM_138457    | 1.257 | 0.82  |       |       |  |  | Transcription. Regulation of transcription, DNA-dependent. Central nervous system development. Cell differentiation.          |
| P2RY2        | purinergic receptor P2Y2                                          | NM_176072    |       |       | 1.256 | 0.504 |  |  | Regulation of transcription, DNA-dependent.                                                                                   |
| N/A          | CLECSF1                                                           | AY358376     |       |       | 1.256 | 0.957 |  |  | Cell ion homeostasis. Signal transduction. G-protein signaling, coupled to IP3 second messenger (phospholipase C activating). |
| N/A          | N/A                                                               | AK128534     |       |       | 1.256 | 0.667 |  |  | Skeletal development.                                                                                                         |
| KPNA6        | karyopherin alpha 6                                               | NM_012316    |       |       | 1.255 | 0.477 |  |  | NLS-bearing substrate-nucleus import. Intracellular protein transport.                                                        |
| GDF8         | growth differentiation factor 8                                   | NM_005259    |       |       | 1.255 | 1.122 |  |  | Transforming growth factor beta receptor signaling pathway. Muscle development. Growth.                                       |
| N/A          | Unknown (protein for IMAGE:30345306)                              | BC066345     | 1.254 | 1.005 |       |       |  |  |                                                                                                                               |
| N/A          | Unknown (protein for IMAGE:5242289)                               | BC036877     |       |       | 1.254 | 0.432 |  |  |                                                                                                                               |
| N/A          | Similar to major histocompatibility complex, class II, DP beta 1* | BC017967     |       |       | 1.254 | 0.793 |  |  |                                                                                                                               |
| N/A          | casein kinase II alpha subunit                                    | AY112721     |       |       | 1.254 | 0.467 |  |  | Protein amino acid phosphorylation.                                                                                           |
| N/A          | N/A                                                               | AK130758     |       |       | 1.254 | 0.429 |  |  |                                                                                                                               |
| ACOX1        | * acyl-Coenzyme A oxidase, isoform a*                             | BC008767     | 1.254 | 0.705 |       |       |  |  | Electron transport. Lipid metabolism. Fatty acid beta-oxidation. Prostaglandin metabolism.                                    |
| N/A          | N/A                                                               | AK125981     | 1.253 | 0.718 |       |       |  |  |                                                                                                                               |
| N/A          | N/A                                                               | AK096009     |       |       | 1.253 | 0.455 |  |  | Protein amino acid phosphorylation. Signal transduction. Alcohol metabolism. Lipid metabolism.                                |
| KIAA0895     | KIAA0895 protein                                                  | AB020702     | 1.252 | 0.923 |       |       |  |  |                                                                                                                               |
| CYP1A2       | cytochrome P450, family 1, subfamily A, polypeptide 2*            | NM_000761    |       |       | 1.252 | 0.451 |  |  | Electron transport. Transport.                                                                                                |
| CTGLF1       | centaurin, gamma-like family, member 1*                           | NM_133446    |       |       | 1.252 | 0.351 |  |  |                                                                                                                               |
| N/A          | N/A                                                               | AK124987     |       |       | 1.251 | 0.446 |  |  | Protein amino acid phosphorylation. Signal transduction. Alcohol metabolism. Lipid metabolism.                                |
| FKSG42       | FKSG42                                                            | NM_032032    | 1.251 | 0.215 |       |       |  |  |                                                                                                                               |
| C20orf179    | chromosome 20 open reading frame 179                              | NM_178477    |       |       | 1.251 | 0.522 |  |  |                                                                                                                               |
| C20orf173    | chromosome 20 open reading frame 173                              | NM_080828    |       |       | 1.251 | 0.669 |  |  |                                                                                                                               |
| C2           | complement component 2 precursor                                  | NM_000063    | 1.251 | 0.947 |       |       |  |  | Proteolysis and peptidolysis. Immune response. Complement activation, classical pathway,                                      |
| ZNF133       | zinc finger protein 133                                           | BC001887     | 1.25  | 1.099 |       |       |  |  | Transcription. Regulation of transcription, DNA-dependent.                                                                    |
| FLJ46836     | FLJ46836 protein                                                  | NM_207509    |       |       | 1.25  | 0.3   |  |  |                                                                                                                               |

|                |                                                                           |              |       |       |       |       |  |  |                                                                                                                             |
|----------------|---------------------------------------------------------------------------|--------------|-------|-------|-------|-------|--|--|-----------------------------------------------------------------------------------------------------------------------------|
| FLJ13842       | hypothetical protein FLJ13842                                             | NM_024645    | 1.25  | 0.788 |       |       |  |  |                                                                                                                             |
| EFEMP1         | EGF-containing fibulin-like extracellular matrix protein 1 isoform        | NM_004105    | 1.25  | 0.576 |       |       |  |  | Visual perception.                                                                                                          |
| GNG7           | guanine nucleotide binding protein (G protein), gamma 7*                  | NM_052847    |       |       | 1.249 | 0.582 |  |  | Signal transduction. Regulation of G-protein coupled receptor protein signaling pathway.                                    |
| FXYD7          | FXD domain-containing ion transport regulator 7                           | NM_022006    |       |       | 1.249 | 0.624 |  |  | Ion transport.                                                                                                              |
| CLECSF12       | * C-type lectin, superfamily member 12 isoform h*                         | NM_197953    | 1.249 | 0.445 |       |       |  |  | Phagocytosis, recognition. Cell recognition. Carbohydrate mediated signaling. Antibacterial humoral response.               |
| KRTAP10-5      | keratin associated protein KAP10.5                                        | AJ566384     |       |       | 1.248 | 0.829 |  |  |                                                                                                                             |
| KIAA1157       | KIAA1157 protein                                                          | AB032983     | 1.248 | 0.645 |       |       |  |  |                                                                                                                             |
| FLJ40321       | FLJ40321 protein                                                          | NM_198479    |       |       | 1.248 | 0.324 |  |  |                                                                                                                             |
| FLJ40235       | hypothetical protein FLJ40235                                             | NM_173635    |       |       | 1.248 | 0.562 |  |  |                                                                                                                             |
| VGf            | VGf nerve growth factor inducible precursor                               | NM_003378    |       |       | 1.247 | 0.961 |  |  |                                                                                                                             |
| PFKP           | * phosphofructokinase, platelet*                                          | BC029138     | 1.247 | 0.925 |       |       |  |  | Glycolysis.                                                                                                                 |
| ARHGEF4        | Rho guanine nucleotide exchange factor 4 isoform b                        | NM_032995    |       |       | 1.247 | 0.604 |  |  | Intracellular signaling cascade.                                                                                            |
| LCN10          | lipocalin 10                                                              | NM_001001712 |       |       | 1.246 | 0.422 |  |  |                                                                                                                             |
| EML1           | EML1 protein                                                              | BC033043     | 1.246 | 0.879 |       |       |  |  | Visual perception.                                                                                                          |
| ChGn           | ChGn protein                                                              | BC060772     | 1.246 | 1.286 |       |       |  |  | Neurogenesis. Cell recognition. Cell proliferation. Morphogenesis. Heparan sulfate proteoglycan biosynthesis.               |
| BTC            | betacellulin                                                              | BC011618     | 1.246 | 0.302 |       |       |  |  | Regulation of cell cycle. Positive regulation of cell proliferation.                                                        |
| AUTS2          | autism susceptibility candidate 2                                         | NM_015570    | 1.246 | 0.378 |       |       |  |  |                                                                                                                             |
| OBP1a          | putative odorant binding protein ag                                       | AJ251024     |       |       | 1.245 | 0.495 |  |  | Perception of smell. Chemosensory behavior. Electron transport.                                                             |
| N/A            | Similar to hypothetical protein FLJ21463                                  | BC019703     | 1.245 | 1.246 |       |       |  |  |                                                                                                                             |
| N/A            | N/A                                                                       | AK125806     |       |       | 1.245 | 0.374 |  |  |                                                                                                                             |
| DKFZp686C05222 | hypothetical protein cDNA DKFZp686C05222 (from clone DKFZ: BX538342)      |              | 1.086 | 1.491 | 1.245 | 1.008 |  |  |                                                                                                                             |
| C20orf35       | uncharacterized hypothalamus protein HSMNP1                               | NM_018478    |       |       | 1.245 | 0.615 |  |  | Protein transport.                                                                                                          |
| N/A            | N/A                                                                       | AK023998     | 1.244 | 0.716 |       |       |  |  |                                                                                                                             |
| CST6           | cystatin M precursor                                                      | NM_001323    |       |       | 1.244 | 0.712 |  |  | Morphogenesis.                                                                                                              |
| ARMC3          | armadillo repeat containing 3                                             | NM_173081    |       |       | 1.244 | 0.399 |  |  |                                                                                                                             |
| TCEAL8         | transcription elongation factor A (SII)-like 8                            | NM_153333    | 1.243 | 0.665 |       |       |  |  |                                                                                                                             |
| SORCS3         | VPS10 domain receptor protein SORCS 3                                     | NM_014978    |       |       | 1.243 | 0.504 |  |  | Intracellular protein transport. Neuropeptide signaling pathway.                                                            |
| NFE2L2         | nuclear factor (erythroid-derived 2)-like 2                               | NM_006164    | 1.243 | 0.624 |       |       |  |  | Regulation of transcription, DNA-dependent. Transcription from RNA polymerase II promoter.                                  |
| KCNK12         | * potassium channel, subfamily K, member 12*                              | BC047749     |       |       | 1.243 | 0.825 |  |  | Potassium ion transport.                                                                                                    |
| HIG1           | DKFZP564K247 protein                                                      | NM_014056    | 1.243 | 0.611 |       |       |  |  |                                                                                                                             |
| ELOVL3         | elongation of very long chain fatty acids like 3                          | NM_152310    | 1.243 | 0.373 |       |       |  |  | Fatty acid biosynthesis.                                                                                                    |
| PLSCR2         | phospholipid scramblase 2                                                 | NM_020359    | 1.242 | 1.224 |       |       |  |  | Phospholipid scrambling.                                                                                                    |
| GFPT2          | glutamine-fructose-6-phosphate transaminase 2                             | BC000012     | 1.242 | 0.812 |       |       |  |  | Fructose 6-phosphate metabolism. Energy reserve metabolism. Glutamine metabolism.                                           |
| ZNRD1          | * zinc ribbon domain containing, 1*                                       | NM_170783    | 1.241 | 1.06  |       |       |  |  | Nucleobase, nucleoside, nucleotide and nucleic acid metabolism. RNA elongation. Regulation of transcription, DNA-dependent. |
| WFDC6          | WAP four-disulfide core domain 6 precursor                                | NM_080827    |       |       | 1.241 | 0.609 |  |  |                                                                                                                             |
| TRPM5          | transient receptor potential cation channel, subfamily M, memt: NM_014555 |              |       |       | 1.241 | 0.377 |  |  | Cation transport.                                                                                                           |
| TESK1          | testis-specific protein kinase 1                                          | NM_006285    | 1.241 | 0.748 |       |       |  |  | Protein amino acid phosphorylation. Spermatogenesis.                                                                        |
| STAG3          | stromal antigen 3                                                         | NM_024070    | 1.241 | 0.946 |       |       |  |  | Cell cycle. Chromosome segregation. Meiosis. Synaptonemal complex formation.                                                |
| N/A            | N/A                                                                       | AK092564     | 1.241 | 1.188 |       |       |  |  |                                                                                                                             |
| LRRTM4         | leucine rich repeat transmembrane neuronal 4                              | NM_024993    | 1.241 | 1.476 |       |       |  |  |                                                                                                                             |
| ITGA9          | * integrin, alpha 9 precursor*                                            | NM_002207    | 1.241 | 0.743 |       |       |  |  | Cell-matrix adhesion. Integrin-mediated signaling pathway.                                                                  |
| F12            | coagulation factor XII precursor                                          | NM_000505    | 1.241 | 0.361 |       |       |  |  | Proteolysis and peptidolysis. Blood coagulation. Negative regulation of blood coagulation.                                  |
| CYP2B6         | cytochrome P450, family 2, subfamily B, polypeptide 6*                    | NM_000767    |       |       | 1.241 | 0.771 |  |  | Electron transport.                                                                                                         |
| PADI1          | peptidylarginine deiminase type I                                         | NM_013358    |       |       | 1.239 | 0.353 |  |  | Protein modification.                                                                                                       |
| GPR1           | G protein-coupled receptor 1                                              | BC067833     | 1.239 | 0.6   |       |       |  |  | Protein amino acid phosphorylation. Signal transduction. Alcohol metabolism. Lipid metabolism.                              |
| FXYD3          | FXD domain containing ion transport regulator 3 isoform 2 pr              | NM_021910    |       |       | 1.239 | 0.544 |  |  | Chloride transport.                                                                                                         |
| DKFZp434A1520  | hypothetical protein cDNA DKFZp434A1520 (from clone DKFZ: AL137544)       |              | 1.239 | 1.066 |       |       |  |  |                                                                                                                             |
| ASTL           | astacin-like metalloendopeptidase (M12 family)                            | NM_001002036 |       |       | 1.239 | 0.388 |  |  |                                                                                                                             |
| NOSTRIN        | nitric oxide synthase trafficking                                         | NM_052946    | 1.238 | 0.426 |       |       |  |  |                                                                                                                             |
| N/A            | PRO1992                                                                   | AF118086     | 1.238 | 1.261 |       |       |  |  |                                                                                                                             |
| MMEL2          | membrane metallo-endopeptidase-like 2                                     | NM_033467    |       |       | 1.238 | 0.504 |  |  |                                                                                                                             |
| CRYGN          | gammaN-crystallin variant                                                 | NM_144727    |       |       | 1.238 | 0.714 |  |  |                                                                                                                             |
| BUCS1          | acetyl-Coenzyme A synthetase 3                                            | NM_052956    |       |       | 1.238 | 0.671 |  |  | Lipid metabolism. Metabolism. Energy derivation by oxidation of organic compounds. Benzoate metabolism.                     |
| ZDHHC19        | ZDHHC19 protein                                                           | BC034801     |       |       | 1.237 | 0.247 |  |  |                                                                                                                             |
| PNR            | putative neurotransmitter receptor                                        | NM_003967    | 1.237 | 0.747 |       |       |  |  | Signal transduction. G-protein coupled receptor protein signaling pathway. Synaptic transmission.                           |
| N/A            | unknown                                                                   | AY044233     | 1.237 | 0.667 |       |       |  |  | Transport.                                                                                                                  |

|           |                                                                   |           |       |       |       |       |       |       |                                                                                                                       |
|-----------|-------------------------------------------------------------------|-----------|-------|-------|-------|-------|-------|-------|-----------------------------------------------------------------------------------------------------------------------|
| N/A       | N/A                                                               | AK095544  | 1.327 | 1.047 | 1.237 | 0.55  |       |       |                                                                                                                       |
| GLULD1    | glutamate-ammonia ligase (glutamine synthase) domain conta        | NM_016571 |       |       | 1.237 | 1.082 |       |       |                                                                                                                       |
| ACP5      | tartrate resistant acid phosphatase 5 precursor                   | NM_001611 |       |       | 1.237 | 1.014 |       |       |                                                                                                                       |
| SARG      | specifically androgen-regulated protein                           | NM_023938 |       |       | 1.236 | 0.456 |       |       |                                                                                                                       |
| DAPK1     | death-associated protein kinase 1                                 | NM_004938 |       |       | 1.236 | 0.611 |       |       | Protein amino acid phosphorylation. Apoptosis. Signal transduction. Protein kinase cascade.                           |
| ZCSL3     | * zinc finger, CSL domain containing 3*                           | NM_181706 |       |       | 1.235 | 0.83  |       |       | Protein folding.                                                                                                      |
| N/A       | extracellular calcium-sensing receptor                            | U20780    |       |       | 1.235 | 0.404 |       |       | Ossification. Calcium ion sensing. Calcium ion homeostasis. Signal transduction.                                      |
| N/A       | N/A                                                               | AK075158  |       |       | 1.235 | 0.725 |       |       |                                                                                                                       |
| FRMD4A    | FERM domain containing 4A                                         | NM_018027 |       |       | 1.234 | 0.4   |       |       |                                                                                                                       |
| DNAJC5G   | DnaJ (Hsp40) homolog, subfamily C, member 5 gamma*                | NM_173650 |       |       | 1.234 | 0.497 |       |       |                                                                                                                       |
| HIAT1     | hippocampus abundant transcript 1                                 | NM_033055 |       |       | 1.233 | 0.442 |       |       | Transport. Tetracycline transport.                                                                                    |
| AMIGO2    | AMIGO2 protein                                                    | BC014103  |       |       | 1.233 | 1.236 |       |       |                                                                                                                       |
| CEACAM7   | carcinoembryonic antigen-related cell adhesion molecule 7         | NM_006890 | 1.188 | 1.405 |       |       | 1.232 | 0.709 |                                                                                                                       |
| ADAM22    | a disintegrin and metalloproteinase domain 22 isoform 1 prepr     | NM_021723 |       |       | 1.232 | 0.813 |       |       | Proteolysis and peptidolysis. Negative regulation of cell adhesion. Central nervous system development.               |
| SLC7A9    | * solute carrier family 7 (cationic amino acid transporter, y+ sy | NM_014270 |       |       | 1.231 | 0.969 |       |       | Protein complex assembly. Amino acid metabolism.                                                                      |
| RGS12     | regulator of G-protein signalling 12 isoform 2                    | NM_002926 |       |       | 1.231 | 0.787 |       |       | Signal transduction. Regulation of G-protein coupled receptor protein signaling pathway. Protein transport.           |
| N/A       | Unknown (protein for IMAGE:5223216)                               | BC025775  | 1.751 | 0.802 |       |       | 1.231 | 0.46  |                                                                                                                       |
| KRTAP5-3  | keratin associated protein 5-3                                    | AJ628243  |       |       | 1.231 | 0.432 |       |       |                                                                                                                       |
| FOLR3     | folate receptor 3 precursor                                       | NM_000804 |       |       | 1.23  | 0.314 |       |       | Folic acid transport.                                                                                                 |
| FGF9      | fibroblast growth factor 9 precursor                              | NM_002010 |       |       | 1.23  | 1.071 |       |       | Regulation of cell cycle. Signal transduction. Cell-cell signaling. Cell proliferation. Cell differentiation.         |
| PON1      | paraoxonase 1                                                     | NM_000446 |       |       | 1.229 | 0.357 |       |       | Response to external stimulus.                                                                                        |
| N/A       | hypothetical protein                                              | AJ276510  |       |       | 1.229 | 0.4   |       |       |                                                                                                                       |
| KCNB2     | potassium voltage-gated channel, Shab-related subfamily, mer      | NM_004770 |       |       | 1.229 | 0.869 |       |       | Cation transport. Potassium ion transport. Regulation of smooth muscle contraction.                                   |
| C1QB      | complement component 1, q subcomponent, beta polypeptide          | NM_000491 |       |       | 1.229 | 0.137 |       |       | Phosphate transport. Immune response. Complement activation, classical pathway.                                       |
| N/A       | N/A                                                               | AK130364  |       |       | 1.228 | 0.47  |       |       |                                                                                                                       |
| N/A       | N/A                                                               | AK055569  |       |       | 1.228 | 0.498 |       |       | Proteolysis and peptidolysis.                                                                                         |
| AS3MT     | arsenic (+3 oxidation state) methyltransferase                    | NM_020682 |       |       | 1.228 | 0.478 |       |       | Toxin metabolism. Arsonoacetate metabolism.                                                                           |
| MGC:13379 | HSPC244                                                           | NM_016499 |       |       | 1.227 | 0.588 |       |       |                                                                                                                       |
| SRD5A2    | 3-oxo-5 alpha-steroid 4-dehydrogenase 2                           | NM_000348 |       |       | 1.226 | 0.413 |       |       | Cell-cell signaling. Sex determination. Sex differentiation. Androgen metabolism. Male gonad development.             |
| RLN1      | relaxin 1 preproprotein                                           | NM_006911 | 1.226 | 0.634 |       |       |       |       | Signal transduction. Pregnancy. Physiological process.                                                                |
| N/A       | N/A                                                               | AK127471  |       |       | 1.226 | 0.683 |       |       |                                                                                                                       |
| N/A       | N/A                                                               | AK125068  |       |       | 1.226 | 0.368 |       |       | Protein amino acid phosphorylation. Signal transduction. Alcohol metabolism. Lipid metabolism.                        |
| FKSG53    | FKSG53                                                            | AF336880  | 1.226 | 0.772 |       |       |       |       |                                                                                                                       |
| ZNF75A    | zinc finger protein 75a                                           | NM_153028 |       |       | 1.225 | 1.732 |       |       |                                                                                                                       |
| N/A       | N/A                                                               | AK127109  | 1.225 | 0.197 |       |       |       |       | Protein amino acid phosphorylation. Signal transduction. Alcohol metabolism. Lipid metabolism.                        |
| FCGR3A    | Fc fragment of IgG, low affinity IIIa, receptor for (CD16)*       | NM_000569 |       |       | 1.225 | 0.459 |       |       | Immune response.                                                                                                      |
| N/A       | unknown                                                           | AF353675  |       |       | 1.224 | 0.557 |       |       |                                                                                                                       |
| KRT1B     | keratin 1B                                                        | NM_175078 |       |       | 1.224 | 0.573 |       |       |                                                                                                                       |
| KRT25A    | keratin 25A                                                       | NM_181534 | 1.223 | 0.834 |       |       |       |       |                                                                                                                       |
| KIAA1446  | KIAA1446 protein                                                  | AB040879  |       |       | 1.223 | 0.564 |       |       |                                                                                                                       |
| ADAM30    | a disintegrin and metalloproteinase domain 30 preproprotein       | NM_021794 |       |       | 1.223 | 0.562 |       |       | Proteolysis and peptidolysis.                                                                                         |
| THSD3     | * thrombospondin, type I domain containing 3 isoform 2*           | NM_199265 |       |       | 1.222 | 0.606 |       |       |                                                                                                                       |
| N/A       | LP3428                                                            | AY203949  |       |       | 1.222 | 0.432 |       |       |                                                                                                                       |
| N/A       | galectin-12 isoform b                                             | AF244975  |       |       | 1.222 | 0.823 |       |       | Apoptosis.                                                                                                            |
| HB6       | E-type ATPase                                                     | AF034840  |       |       | 1.222 | 0.642 |       |       |                                                                                                                       |
| C1orf21   | chromosome 1 open reading frame 21                                | NM_030806 |       |       | 1.222 | 0.772 |       |       |                                                                                                                       |
| UNC5CL    | unc-5 homolog C-like                                              | NM_173561 |       |       | 1.221 | 0.737 |       |       | Signal transduction.                                                                                                  |
| N/A       | N/A                                                               | AK074560  | 1.221 | 0.732 |       |       |       |       | Chromatin assembly or disassembly. Transcription. Regulation of transcription, DNA-dependent. Chromatin modification. |
| LOC201191 | LOC201191 protein                                                 | BC047081  | 1.221 | 0.687 |       |       |       |       |                                                                                                                       |
| FLJ00256  | FLJ00256 protein                                                  | AK074183  |       |       | 1.221 | 0.68  |       |       |                                                                                                                       |
| PSMB4     | proteasome beta 4 subunit                                         | BC017486  | 1.22  | 0.38  |       |       |       |       | Ubiquitin-dependent protein catabolism.                                                                               |
| N/A       | replicative senescence downregulated leo1-like protein            | AY302186  | 1.22  | 0.518 |       |       |       |       |                                                                                                                       |
| N/A       | N/A                                                               | AK093639  |       |       | 1.22  | 0.722 |       |       |                                                                                                                       |
| N/A       | myosin-reactive immunoglobulin light chain variable region        | AF035032  |       |       | 1.22  | 0.517 |       |       |                                                                                                                       |
| MGC3020   | hypothetical protein MGC3020                                      | NM_024048 |       |       | 1.22  | 0.535 |       |       |                                                                                                                       |
| KIAA1137  | KIAA1137 protein                                                  | AB032963  | 1.22  | 0.581 |       |       |       |       | Cation transport.                                                                                                     |



|               |                                                                   |              |       |       |       |       |       |                                                                                                                                 |  |
|---------------|-------------------------------------------------------------------|--------------|-------|-------|-------|-------|-------|---------------------------------------------------------------------------------------------------------------------------------|--|
| MGC71999      | alpha-NAC protein                                                 | NM_199290    | 1.205 | 0.826 |       |       |       |                                                                                                                                 |  |
| IRF6          | interferon regulatory factor 6                                    | NM_006147    |       |       |       | 1.205 | 1.001 | Regulation of transcription, DNA-dependent.                                                                                     |  |
| N/A           | N/A                                                               | L32537       |       |       |       | 1.204 | 0.584 |                                                                                                                                 |  |
| LOC57821      | hypothetical protein LOC57821                                     | NM_021179    | 1.204 | 0.581 |       |       |       |                                                                                                                                 |  |
| CASC1         | cancer susceptibility candidate 1                                 | NM_018272    |       |       | 1.204 | 0.954 |       |                                                                                                                                 |  |
| C7orf9        | chromosome 7 open reading frame 9                                 | NM_022150    | 1.204 | 1.398 |       |       |       | Neuropeptide signaling pathway.                                                                                                 |  |
| BCL2L14       | BCL2-like 14 isoform 2                                            | NM_030766    |       |       |       | 1.204 | 0.666 | Regulation of apoptosis.                                                                                                        |  |
| TPD52         | tumor protein D52                                                 | NM_005079    |       |       |       | 1.203 | 0.612 | Morphogenesis.                                                                                                                  |  |
| SORBS1        | sorbin and SH3 domain containing 1                                | NM_015385    | 1.203 | 0.702 |       |       |       | Transport. Insulin receptor signaling pathway. Glucose transport. Stress fiber formation.                                       |  |
| N/A           | N/A                                                               | AK056842     |       |       | 1.203 | 0.214 |       | Protein amino acid phosphorylation. Signal transduction. Alcohol metabolism. Lipid metabolism. Metabolism.                      |  |
| FLJ32825      | hypothetical protein FLJ32825                                     | NM_152492    |       |       |       | 1.203 | 0.441 |                                                                                                                                 |  |
| N/A           | N/A                                                               | AK124944     | 1.202 | 0.622 |       |       |       |                                                                                                                                 |  |
| N/A           | N/A                                                               | AK095177     | 1.202 | 1.183 |       |       |       | Protein amino acid phosphorylation. Signal transduction. Alcohol metabolism. Lipid metabolism.                                  |  |
| INPP4A        | INPP4A protein                                                    | BC028361     | 1.202 | 1.025 |       |       |       | Signal transduction.                                                                                                            |  |
| IL8RB         | interleukin 8 receptor beta                                       | NM_001557    |       |       |       | 1.201 | 0.372 | Cell motility. Chemotaxis. Inflammatory response. Cellular defense response. G-protein signaling.                               |  |
| ENO1P         | ENO1P protein                                                     | BC046928     |       |       |       | 1.201 | 0.272 |                                                                                                                                 |  |
| CXCL6         | chemokine (C-X-C motif) ligand 6 (granulocyte chemotactic pr      | NM_002993    | 1.201 | 0.408 |       |       |       | RNA-dependent DNA replication. Chemotaxis. Inflammatory response. Signal transduction.                                          |  |
| SCGF          | stem cell growth factor precursor * lymphocyte secreted C-type    | NM_002975    |       |       |       | 1.2   | 0.41  | Positive regulation of cell proliferation.                                                                                      |  |
| OR1N2         | olfactory receptor, family 1, subfamily N, member 2*              | NM_001004457 |       |       |       | 1.2   | 0.614 |                                                                                                                                 |  |
| N/A           | N/A                                                               | AK124599     | 1.2   | 0.943 |       |       |       |                                                                                                                                 |  |
| APOE          | apolipoprotein E precursor                                        | NM_000041    | 1.2   | 0.388 |       |       |       | Response to reactive oxygen species. Lipid transport. Induction of apoptosis. Cytoskeleton organization and biogenesis.         |  |
| ADAM11        | a disintegrin and metalloprotease domain 11 isoform 1 prepro      | NM_002390    |       |       |       | 1.2   | 0.606 | Proteolysis and peptidolysis. Integrin-mediated signaling pathway.                                                              |  |
| TECTB         | tectorin beta                                                     | NM_058222    |       |       |       | 1.199 | 1.296 |                                                                                                                                 |  |
| N/A           | N/A                                                               | AK124147     |       |       |       | 1.199 | 0.258 |                                                                                                                                 |  |
| LAMC3         | laminin gamma 3 chain precursor                                   | AF041835     |       |       |       | 1.199 | 0.864 | Cell adhesion.                                                                                                                  |  |
| FLJ35816      | FLJ35816 protein                                                  | NM_207489    |       |       |       | 1.199 | 0.281 |                                                                                                                                 |  |
| EIF3S3        | * eukaryotic translation initiation factor 3, subunit 3 gamma, 4C | BC000386     |       |       | 1.199 | 0.6   |       | Protein biosynthesis. Regulation of translational initiation.                                                                   |  |
| CCL16         | small inducible cytokine A16 precursor                            | NM_004590    |       |       |       | 1.199 | 0.553 | Chemotaxis. Inflammatory response. Cell-cell signaling. Sensory perception. Antimicrobial humoral response.                     |  |
| N/A           | Unknown (protein for MGC:72083)                                   | BC062442     | 1.198 | 0.572 |       |       |       |                                                                                                                                 |  |
| N/A           | Unknown (protein for IMAGE:5313099)                               | BC036083     |       |       |       | 1.198 | 0.554 | Protein amino acid phosphorylation. Signal transduction. Alcohol metabolism. Lipid metabolism.                                  |  |
| N/A           | N/A                                                               | AK095678     | 1.198 | 0.621 |       |       |       |                                                                                                                                 |  |
| N/A           | N/A                                                               | AK090830     | 1.198 | 1.283 |       |       |       |                                                                                                                                 |  |
| KIAA1599      | KIAA1599 protein                                                  | AB046819     |       |       |       | 1.198 | 0.72  |                                                                                                                                 |  |
| AKAP          | protein kinase                                                    | M90359       | 1.198 | 0.753 |       |       |       | Protein targeting. Signal transduction. Synaptic transmission.                                                                  |  |
| ABCC13        | ATP-binding cassette protein C13 isoform a                        | NM_138726    |       |       |       | 1.198 | 0.481 | Transport.                                                                                                                      |  |
| N/A           | N/A                                                               | AK124635     | 1.257 | 1.126 |       | 1.197 | 0.43  | Proteolysis and peptidolysis. Lipid metabolism. Steroid metabolism. Cholesterol metabolism.                                     |  |
| ALOX15B       | arachidonate 15-lipoxygenase, second type*                        | NM_001141    |       |       |       | 1.197 | 0.522 | Electron transport. Lipid metabolism. Fatty acid metabolism. Induction of apoptosis. Negative regulation of cell proliferation. |  |
| PLA2G1B       | phospholipase A2, group IB*                                       | NM_000928    |       |       |       | 1.196 | 0.674 | Actin filament organization. Signal transduction. Lipid catabolism.                                                             |  |
| KIAA1266      | KIAA1266 protein                                                  | AB033092     | 1.196 | 0.627 |       |       |       | Regulation of transcription, DNA-dependent.                                                                                     |  |
| DKFZp434K0322 | hypothetical protein                                              | AL137708     |       |       |       | 1.196 | 0.631 |                                                                                                                                 |  |
| CD3Z          | T-cell receptor zeta chain isoform 1 precursor                    | NM_198053    |       |       |       | 1.196 | 0.684 | Cell surface receptor linked signal transduction.                                                                               |  |
| WARS2         | mitochondrial tryptophanyl tRNA synthetase 2 isoform 2 precu      | NM_201263    |       |       | 1.195 | 0.988 |       | Protein biosynthesis. Tryptophanyl-tRNA aminoacylation.                                                                         |  |
| N/A           | brain my048 protein                                               | AF063606     |       |       | 1.195 | 0.918 |       |                                                                                                                                 |  |
| LOC388937     | LOC388937 protein                                                 | BC065041     |       |       |       | 1.195 | 0.356 |                                                                                                                                 |  |
| LOC348645     | hypothetical protein LOC348645                                    | NM_198851    | 1.195 | 0.476 |       |       |       |                                                                                                                                 |  |
| FLJ10916      | hypothetical protein FLJ10916                                     | NM_018271    |       |       |       | 1.195 | 0.496 | Metabolism.                                                                                                                     |  |
| FGF16         | fibroblast growth factor 16                                       | NM_003868    |       |       | 1.195 | 0.547 |       | Signal transduction. Cell-cell signaling. Metabolism. Response to temperature. Organogenesis.                                   |  |
| PDP1          | pyruvate dehydrogenase phosphatase regulatory subunit             | NM_017990    | 1.194 | 0.657 |       |       |       | Electron transport. Glycine catabolism.                                                                                         |  |
| N/A           | AHPA9419                                                          | AY358263     | 1.194 | 0.445 |       |       |       |                                                                                                                                 |  |
| N/A           | HSPC295                                                           | AF161413     | 1.194 | 0.631 |       |       |       |                                                                                                                                 |  |
| HSPA6         | heat shock 70kDa protein 6 (HSP70B)                               | NM_002155    | 1.194 | 0.989 |       |       |       | Protein folding. Response to unfolded protein.                                                                                  |  |
| FLJ41841      | FLJ41841 protein                                                  | NM_207499    |       |       |       | 1.194 | 0.546 |                                                                                                                                 |  |
| MUC5B         | mucin                                                             | AF086604     | 1.217 | 1.146 |       | 1.193 | 0.464 |                                                                                                                                 |  |
| ICA1          | islet cell autoantigen 1 isoform 1                                | NM_022307    | 1.042 | 0.97  | 1.193 | 0.627 |       | Neurotransmitter transport. Regulation of neurotransmitter secretion.                                                           |  |
| EIF2C2        | * eukaryotic translation initiation factor 2C, 2*                 | NM_012154    |       |       | 1.193 | 0.719 |       | Protein biosynthesis.                                                                                                           |  |
| DCDC1         | doublecortin domain containing 1                                  | NM_181807    | 1.193 | 0.951 |       |       |       |                                                                                                                                 |  |



|               |                                                                 |              |       |       |       |       |       |       |       |       |                                                                                                                         |
|---------------|-----------------------------------------------------------------|--------------|-------|-------|-------|-------|-------|-------|-------|-------|-------------------------------------------------------------------------------------------------------------------------|
| CD3G          | CD3G gamma precursor                                            | NM_000073    |       |       |       |       |       |       | 1.193 | 0.507 | Establishment and/or maintenance of cell polarity. Cell surface receptor linked signal transduction. Protein transport. |
| AGER          | advanced glycosylation end product-specific receptor isoform 1  | NM_001136    |       |       |       |       |       | 1.193 | 1.004 |       | Inflammatory response. Cell surface receptor linked signal transduction.                                                |
| ORMDL1        | ORM1-like 1                                                     | NM_016467    |       |       |       |       |       | 1.192 | 0.919 |       |                                                                                                                         |
| N/A           | Similar to hypothetical gene LOC118703                          | BC031882     |       |       |       |       |       | 1.192 | 0.71  |       |                                                                                                                         |
| MFRP          | membrane frizzled-related protein                               | NM_031433    |       |       |       |       |       | 1.192 | 0.544 |       | Development. Embryonic development.                                                                                     |
| N/A           | N/A                                                             | AK092739     |       |       |       |       |       | 1.191 | 0.452 |       | Electron transport. Intracellular signaling cascade.                                                                    |
| MAOA          | monoamine oxidase A                                             | NM_000240    |       |       |       |       |       | 1.191 | 0.603 |       | Electron transport. Catecholamine metabolism. Behavior. Neurotransmitter catabolism.                                    |
| DKFZp434P185  | hypothetical protein                                            | AL834225     |       |       |       |       |       | 1.191 | 0.407 |       | Potassium ion transport. Sodium ion transport. Calcium ion transport.                                                   |
| DKFZp434B172  | hypothetical protein                                            | AL117530     |       |       |       |       |       | 1.191 | 0.588 |       |                                                                                                                         |
| BLVRB         | biliverdin reductase B (flavin reductase (NADPH))               | NM_000713    |       |       |       |       |       | 1.191 | 0.848 |       | Nucleotide-sugar metabolism.                                                                                            |
| N/A           | N/A                                                             | AK125674     |       |       |       |       |       | 1.19  | 0.213 |       |                                                                                                                         |
| FLJ25005      | FLJ25005 protein                                                | NM_152334    | 1.03  | 1.097 | 1.19  | 1.169 |       |       |       |       | Electron transport. Protein biosynthesis. Threonyl-tRNA aminoacylation.                                                 |
| CREB3L3       | cAMP responsive element binding protein 3-like 3                | NM_032607    |       |       |       |       |       | 1.19  | 0.458 |       | Regulation of transcription, DNA-dependent.                                                                             |
| CLCNKA        | chloride channel Ka                                             | BC053869     |       |       | 1.19  | 1.12  |       |       |       |       | Ion transport. Chloride transport. Excretion. Excretion.                                                                |
| CDH1          | cadherin 1, type 1 preproprotein*                               | NM_004360    |       |       |       |       |       | 1.19  | 0.491 |       | Cell adhesion. Homophilic cell adhesion. Homophilic cell adhesion.                                                      |
| ADAM21        | a disintegrin and metalloproteinase domain 21 preproprotein     | NM_003813    |       |       | 1.19  | 0.83  |       |       |       |       | Proteolysis and peptidolysis. Fertilization.                                                                            |
| TRPM1         | transient receptor potential cation channel, subfamily M, memb  | NM_002420    |       |       |       |       |       | 1.189 | 0.624 |       | Cation transport.                                                                                                       |
| NAGLU         | alpha-N-acetylglucosaminidase                                   | NM_000263    |       |       | 1.189 | 0.142 |       |       |       |       | Carbohydrate metabolism. Neurogenesis. Glycosaminoglycan metabolism.                                                    |
| N/A           | zinc finger protein C2H2-25                                     | U38904       |       |       |       |       |       | 1.189 | 0.761 |       | Regulation of transcription, DNA-dependent.                                                                             |
| N/A           | N/A                                                             | AK127527     |       |       |       |       |       | 1.189 | 0.288 |       |                                                                                                                         |
| MYO3B         | myosin IIIB                                                     | NM_138995    |       |       | 1.189 | 1.04  |       |       |       |       | Protein amino acid phosphorylation. Signal transduction. Alcohol metabolism. Lipid metabolism.                          |
| DKFZp434H0735 | hypothetical protein                                            | AL117509     |       |       |       |       |       | 1.189 | 0.563 |       |                                                                                                                         |
| PDZK4         | PDZ domain containing 4                                         | NM_032512    |       |       |       |       |       | 1.188 | 0.583 |       |                                                                                                                         |
| N/A           | N/A                                                             | AK126747     |       |       |       |       |       | 1.188 | 0.626 |       |                                                                                                                         |
| N/A           | PRO0641                                                         | AF090939     |       |       | 1.188 | 0.882 |       |       |       |       |                                                                                                                         |
| MGC10715      | novel C2H2 type zinc finger protein                             | NM_024325    | 1.163 | 1.033 |       |       | 1.188 | 0.828 |       |       | Regulation of transcription, DNA-dependent.                                                                             |
| FLJ12242      | hypothetical protein FLJ12242                                   | NM_024681    |       |       | 1.188 | 0.845 |       |       |       |       | Potassium ion transport.                                                                                                |
| DIRAS1        | small GTP-binding tumor suppressor 1                            | NM_145173    |       |       | 1.188 | 0.798 |       |       |       |       | Small GTPase mediated signal transduction.                                                                              |
| ABLIM2        | actin binding LIM protein family, member 2*                     | NM_032432    |       |       |       |       |       | 1.188 | 1.039 |       | Cytoskeleton organization and biogenesis.                                                                               |
| ZNF556        | zinc finger protein 556                                         | NM_024967    |       |       | 1.187 | 1.168 |       |       |       |       | Regulation of transcription, DNA-dependent.                                                                             |
| SCG3          | secretogranin III                                               | NM_013243    |       |       |       |       |       | 1.187 | 0.492 |       |                                                                                                                         |
| N/A           | MAS-related G protein-coupled receptor                          | AY255572     |       |       |       |       |       | 1.187 | 0.453 |       |                                                                                                                         |
| N/A           | N/A                                                             | AK094417     |       |       |       |       |       | 1.187 | 0.293 |       |                                                                                                                         |
| N/A           | N/A                                                             | AK057335     |       |       |       |       |       | 1.187 | 0.633 |       |                                                                                                                         |
| MRPL30        | mitochondrial ribosomal protein L30 isoform a                   | NM_145212    |       |       | 1.187 | 1.603 |       |       |       |       | Protein amino acid phosphorylation. Signal transduction. Alcohol metabolism. Lipid metabolism.                          |
| COX6A2        | cytochrome c oxidase subunit VIa polypeptide 2 precursor        | NM_005205    |       |       | 1.187 | 0.824 |       |       |       |       | Electron transport.                                                                                                     |
| MPP2          | palmitoylated membrane protein 2                                | NM_005374    |       |       | 1.186 | 0.689 |       |       |       |       | Protein complex assembly. Signal transduction.                                                                          |
| LRRRC21       | retina specific protein PAL                                     | NM_015613    |       |       | 1.186 | 0.593 |       |       |       |       |                                                                                                                         |
| FLJ46365      | FLJ46365 protein                                                | NM_207504    |       |       | 1.186 | 0.651 |       |       |       |       | Immune response. Signal transduction.                                                                                   |
| C11orf21      | N/A                                                             | AB029488     |       |       |       |       |       | 1.186 | 0.432 |       |                                                                                                                         |
| SLC39A2       | solute carrier family 39 (zinc transporter), member 2*          | NM_014579    |       |       |       |       |       | 1.185 | 0.563 |       | Zinc ion transport.                                                                                                     |
| BCLP          | beta-casein-like protein                                        | NM_033504    |       |       | 1.185 | 0.777 |       |       |       |       | Glycolysis.                                                                                                             |
| NUDT4         | nudix (nucleoside diphosphate linked moiety X)-type motif 4 iso | NM_199040    |       |       | 1.184 | 0.864 |       |       |       |       | Protein amino acid phosphorylation. Signal transduction. Alcohol metabolism. Lipid metabolism.                          |
| N/A           | N/A                                                             | AK094447     |       |       |       |       |       | 1.184 | 0.537 |       |                                                                                                                         |
| DKFZp434H0512 | hypothetical proteincDNA DKFZp434H0512 (from clone DKFZ)        | AL137620     |       |       | 1.184 | 0.778 |       |       |       |       |                                                                                                                         |
| CYP8B1        | cytochrome P450, family 8, subfamily B, polypeptide 1*          | NM_004391    |       |       |       |       |       | 1.184 | 0.636 |       | Electron transport.                                                                                                     |
| N/A           | N/A                                                             | AK128231     |       |       | 1.183 | 0.701 |       |       |       |       | Generation of precursor metabolites and energy. Transport. Water transport. Excretion. Glycerol transport.              |
| N/A           | N/A                                                             | AK124497     | 1.295 | 2.165 | 1.183 | 1.276 |       |       |       |       |                                                                                                                         |
| IL10RA        | * interleukin 10 receptor, alpha precursor*                     | NM_001558    |       |       | 1.183 | 0.288 |       |       |       |       |                                                                                                                         |
| GGT2          | gamma-glutamyl transpeptidase small subunit                     | M30474       |       |       | 1.183 | 0.364 |       |       |       |       | Amino acid metabolism. Glutathione biosynthesis. Glutathione biosynthesis.                                              |
| MAP1D         | methionine aminopeptidase 1D                                    | NM_199227    |       |       | 1.182 | 0.825 |       |       |       |       |                                                                                                                         |
| KLK2          | kallikrein 2, prostatic isoform 2*                              | NM_001002231 |       |       |       |       |       | 1.182 | 0.605 |       | Proteolysis and peptidolysis.                                                                                           |
| GPC3          | glypican 3                                                      | NM_004484    |       |       | 1.182 | 0.497 |       |       |       |       | Morphogenesis.                                                                                                          |
| FLJ32569      | hypothetical protein FLJ32569                                   | NM_152491    |       |       | 1.182 | 0.59  |       |       |       |       | Proteolysis and peptidolysis.                                                                                           |
| SST           | somatostatin                                                    | NM_001048    |       |       |       |       |       | 1.181 | 0.29  |       |                                                                                                                         |
| SLC6A15       | * solute carrier family 6 (neurotransmitter transporter), membe | NM_182767    |       |       | 1.181 | 0.789 |       |       |       |       | Neurotransmitter transport. Neurotransmitter transport.                                                                 |

|                |                                                                    |              |       |       |       |       |  |                                                                                                                   |
|----------------|--------------------------------------------------------------------|--------------|-------|-------|-------|-------|--|-------------------------------------------------------------------------------------------------------------------|
| RAB9B          | RAB9-like protein                                                  | NM_016370    | 1.181 | 0.723 |       |       |  |                                                                                                                   |
| PMCHL1         | pro-melanin-concentrating hormone-like 1                           | NM_031887    | 1.181 | 0.714 |       |       |  | Synaptic transmission. Behavior.                                                                                  |
| N/A            | N/A                                                                | AK128864     |       |       | 1.181 | 0.444 |  |                                                                                                                   |
| N/A            | N/A                                                                | AK123892     | 1.181 | 0.523 |       |       |  | Protein amino acid phosphorylation.                                                                               |
| FCGBP          | Fc fragment of IgG binding protein                                 | NM_003890    |       |       | 1.181 | 0.268 |  | Cell adhesion. Binding of sperm to zona pellucida.                                                                |
| VGLL1          | vestibular like 1                                                  | NM_016267    | 1.18  | 0.632 |       |       |  | Regulation of transcription, DNA-dependent.                                                                       |
| USF1           | upstream stimulatory factor 1 isoform 1                            | NM_007122    |       |       | 1.18  | 0.74  |  | Regulation of transcription, DNA-dependent.                                                                       |
| TRPC5          | * transient receptor potential cation channel, subfamily C, men    | NM_012471    | 1.18  | 0.712 |       |       |  | Cation transport. Calcium ion transport. Neurogenesis.                                                            |
| KIAA1030       | KIAA1030 protein                                                   | AB028953     |       |       | 1.18  | 0.601 |  |                                                                                                                   |
| PGLYRP2        | peptidoglycan recognition protein L precursor                      | NM_052890    | 1.179 | 0.805 |       |       |  | Peptidoglycan catabolism. Detection of bacteria. Detection of bacteria. Innate immune response.                   |
| N/A            | NOXS                                                               | AY358983     | 1.179 | 0.746 |       |       |  |                                                                                                                   |
| EPHA10         | hypothetical protein FLJ33655                                      | NM_001004338 |       |       | 1.179 | 0.52  |  | Protein amino acid phosphorylation. Transmembrane receptor protein tyrosine kinase signaling pathway.             |
| PIP            | prolactin-induced protein                                          | BC010951     |       |       | 1.177 | 0.482 |  |                                                                                                                   |
| MC3R           | melanocortin 3 receptor                                            | NM_019888    |       |       | 1.177 | 0.38  |  | Signal transduction. G-protein signaling, coupled to cyclic nucleotide second messenger.                          |
| KLF1           | Kruppel-like factor 1 (erythroid)                                  | NM_006563    |       |       | 1.177 | 0.511 |  | Regulation of transcription, DNA-dependent. Organogenesis.                                                        |
| KIAA1490       | KIAA1490 protein                                                   | AB040923     |       |       | 1.177 | 0.422 |  | Actin cytoskeleton organization and biogenesis.                                                                   |
| ZNF365         | zinc finger protein 365 isoform D                                  | NM_199452    | 1.176 | 0.619 |       |       |  |                                                                                                                   |
| N/A            | triiodothyronine receptor                                          | M24900       | 1.176 | 0.469 |       |       |  | Regulation of transcription, DNA-dependent.                                                                       |
| N/A            | N/A                                                                | AK125786     | 1.176 | 0.746 |       |       |  |                                                                                                                   |
| N/A            | N/A                                                                | AK001998     | 1.176 | 0.672 |       |       |  | Protein amino acid phosphorylation. Signal transduction. Alcohol metabolism. Lipid metabolism.                    |
| CFL2           | cofilin 2                                                          | NM_138638    | 1.176 | 0.59  |       |       |  |                                                                                                                   |
| ADAMTS3        | * a disintegrin-like and metalloprotease (reprolysin type) with t  | NM_014243    | 1.176 | 0.586 |       |       |  | Collagen fibril organization. Collagen catabolism.                                                                |
| TAC1           | tachykinin 1 isoform beta precursor                                | NM_003182    |       |       | 1.175 | 0.591 |  | Tachykinin signaling pathway. Neuropeptide signaling pathway. Cell-cell signaling. Synaptic transmission.         |
| SCN11A         | sodium channel, voltage-gated, type XI, alpha"                     | NM_014139    |       |       | 1.175 | 0.919 |  | Cation transport. Sodium ion transport. Synaptic transmission.                                                    |
| GPR153         | G protein-coupled receptor 153                                     | NM_207370    |       |       | 1.175 | 0.591 |  | G-protein coupled receptor protein signaling pathway.                                                             |
| SEMG2          | semenogelin II precursor                                           | NM_003008    |       |       | 1.174 | 0.696 |  | Sexual reproduction.                                                                                              |
| N/A            | unknown                                                            | AF390030     | 1.174 | 0.739 |       |       |  |                                                                                                                   |
| EOS            | EOS protein                                                        | BC036846     |       |       | 1.174 | 0.412 |  |                                                                                                                   |
| PNPLA4         | GS2 gene                                                           | NM_004650    | 1.173 | 0.831 |       |       |  |                                                                                                                   |
| OGDHL          | oxoglutarate dehydrogenase-like                                    | NM_018245    | 1.173 | 1.107 |       |       |  | Glycolysis. Metabolism.                                                                                           |
| N/A            | N/A                                                                | AK124340     |       |       | 1.173 | 0.438 |  |                                                                                                                   |
| KIAA2017       | KIAA2017 protein                                                   | AB095937     |       |       | 1.173 | 0.493 |  | Microtubule-based movement.                                                                                       |
| CD48           | CD48 protein                                                       | BC030224     |       |       | 1.173 | 0.408 |  | Defense response.                                                                                                 |
| N/A            | N/A                                                                | AK126528     | 1.172 | 0.464 |       |       |  |                                                                                                                   |
| RGS2           | regulator of G-protein signalling like 2                           | NM_032267    |       |       | 1.171 | 0.9   |  | Protein amino acid phosphorylation. Signal transduction. Alcohol metabolism. Lipid metabolism.                    |
| N/A            | * UDP-Gal:glucosylceramide beta-1,4-galactosyltransferase*         | AF097159     | 1.171 | 0.753 |       |       |  | Carbohydrate metabolism.                                                                                          |
| HCRT           | orexin precursor                                                   | NM_001524    |       |       | 1.171 | 0.537 |  | Neuropeptide signaling pathway. Synaptic transmission. Feeding behavior.                                          |
| H3F3A          | * H3 histone, family 3A*                                           | BC038989     | 1.171 | 0.498 |       |       |  |                                                                                                                   |
| FLJ90661       | hypothetical protein FLJ90661                                      | NM_173502    |       |       | 1.171 | 0.432 |  |                                                                                                                   |
| FLJ12681       | hypothetical protein FLJ12681                                      | NM_022773    | 1.171 | 0.864 |       |       |  |                                                                                                                   |
| cPLA2          | cytosolic phospholipase A2 delta                                   | AB090876     | 1.171 | 1.097 |       |       |  |                                                                                                                   |
| OR52M1         | * olfactory receptor, family 52, subfamily M, member 1*            | NM_001004137 | 1.17  | 0.898 |       |       |  |                                                                                                                   |
| N/A            | N/A                                                                | AK130383     | 1.17  | 0.73  |       |       |  |                                                                                                                   |
| N/A            | N/A                                                                | AK094364     |       |       | 1.17  | 0.698 |  |                                                                                                                   |
| LOC136288      | LOC136288 protein                                                  | BC031107     | 1.17  | 1.361 |       |       |  |                                                                                                                   |
| KIAA0726       | KIAA0726 protein                                                   | AB018269     | 1.17  | 1.22  |       |       |  | Cell adhesion. Homophilic cell adhesion.                                                                          |
| HLA-DQA2       | major histocompatibility complex, class II, DQ alpha 2*            | NM_020056    |       |       | 1.17  | 0.804 |  | Immune response. Antigen presentation, exogenous antigen. Antigen processing, exogenous antigen via MHC class II. |
| GLP            | golgin-like protein                                                | AF263742     | 1.17  | 0.693 |       |       |  |                                                                                                                   |
| PNMA6A         | paraneoplastic antigen like 6A                                     | NM_032882    |       |       | 1.169 | 0.626 |  |                                                                                                                   |
| EPO            | erythropoietin                                                     | NM_000799    |       |       | 1.169 | 0.603 |  | Response to stress. Signal transduction. Cell-cell signaling. Development. Circulation.                           |
| SEC14L4        | SEC14p-like protein TAP3                                           | NM_174977    |       |       | 1.168 | 0.506 |  | Transport. Intracellular protein transport.                                                                       |
| N/A            | guanylate cyclase-coupled enterotoxin receptor                     | S57551       | 1.168 | 0.797 |       |       |  | cGMP biosynthesis. Protein amino acid phosphorylation. Receptor guanylyl cyclase signaling pathway.               |
| N/A            | erythroid membrane-associated protein                              | AF311284     | 1.168 | 0.52  |       |       |  |                                                                                                                   |
| GPR27          | G protein-coupled receptor 27                                      | NM_018971    |       |       | 1.168 | 0.929 |  | Signal transduction. G-protein coupled receptor protein signaling pathway.                                        |
| DKFZp686P23184 | hypothetical protein cDNA DKFZp686P23184 (from clone DKFz BX538327 |              | 1.168 | 0.431 |       |       |  | Protein amino acid phosphorylation. Signal transduction. Alcohol metabolism. Lipid metabolism.                    |
| DKFZP586B1621  | DKFZP586B1621 protein                                              | NM_015533    | 1.168 | 1.352 |       |       |  | Glycerol metabolism                                                                                               |

|              |                                                              |           |       |       |       |       |  |                                                                                                                     |
|--------------|--------------------------------------------------------------|-----------|-------|-------|-------|-------|--|---------------------------------------------------------------------------------------------------------------------|
| ARS          | ARS component B precursor                                    | NM_020427 | 1.168 | 1.161 |       |       |  | Cell activation. Cell adhesion.                                                                                     |
| ADCY5        | adenylate cyclase 5                                          | NM_183357 | 1.168 | 0.639 |       |       |  | CAMP biosynthesis. Intracellular signaling cascade.                                                                 |
| TUBB5        | tubulin, beta, 5"                                            | NM_006087 |       |       | 1.167 | 0.608 |  | Microtubule-based movement. Protein polymerization.                                                                 |
| KREMEN1      | KREMEN1 protein                                              | BC063787  | 1.167 | 0.715 |       |       |  | Protein amino acid phosphorylation. Signal transduction. Alcohol metabolism. Lipid metabolism.                      |
| CRYGB        | crystallin, gamma B"                                         | NM_005210 |       |       | 1.167 | 0.649 |  |                                                                                                                     |
| SH2D3C       | SH2 domain containing 3C                                     | NM_170600 | 1.166 | 0.473 |       |       |  | JNK cascade. Small GTPase mediated signal transduction.                                                             |
| RASAL1       | RAS protein activator like 1                                 | NM_004658 |       |       | 1.166 | 0.349 |  | Intracellular signaling cascade.                                                                                    |
| PPL          | periplakin                                                   | NM_002705 |       |       | 1.166 | 0.68  |  |                                                                                                                     |
| N/A          | N/A                                                          | AK092426  | 1.166 | 0.625 |       |       |  |                                                                                                                     |
| KRT23        | keratin 23 isoform a                                         | NM_015515 | 1.166 | 1.115 |       |       |  |                                                                                                                     |
| JAG2         | jagged 2 isoform a precursor                                 | NM_002226 |       |       | 1.166 | 0.598 |  | Cell fate determination. Cell cycle. Notch signaling pathway. Cell-cell signaling. Spermatogenesis.                 |
| FOXH1        | forkhead box H1                                              | NM_003923 |       |       | 1.166 | 0.59  |  | Regulation of transcription, DNA-dependent. Signal transduction.                                                    |
| FAM14A       | TLH29 protein precursor                                      | NM_032036 | 1.166 | 0.365 |       |       |  | Response to pest, pathogen or parasite.                                                                             |
| N/A          | calcium channel L-type alpha 1 subunit                       | AF070589  | 1.165 | 0.828 |       |       |  |                                                                                                                     |
| KIAA1170     | KIAA1170 protein                                             | AB032996  | 1.165 | 1.626 |       |       |  |                                                                                                                     |
| FLJ10996     | hypothetical protein FLJ10996                                | BC005078  |       |       | 1.165 | 0.591 |  |                                                                                                                     |
| CRNKL1       | crooked neck-like 1 protein                                  | NM_016652 | 1.165 | 0.691 |       |       |  | Spliceosome assembly.                                                                                               |
| N/A          | N/A                                                          | AK094481  |       |       | 1.164 | 0.536 |  | Protein amino acid phosphorylation. Signal transduction. Alcohol metabolism. Lipid metabolism.                      |
| DDEF1        | development and differentiation enhancing factor 1           | NM_018482 |       |       | 1.164 | 0.477 |  | Regulation of GTPase activity.                                                                                      |
| CLMN         | calponin like transmembrane domain protein                   | NM_024734 | 1.164 | 0.587 |       |       |  |                                                                                                                     |
| BASE         | breast cancer and salivary gland expression gene             | NM_173859 |       |       | 1.164 | 0.426 |  |                                                                                                                     |
| PRPF18       | PRP18 pre-mRNA processing factor 18 homolog                  | NM_003675 | 1.163 | 0.82  |       |       |  | Nuclear mRNA splicing, via spliceosome.                                                                             |
| N/A          | N/A                                                          | BC001051  | 1.163 | 0.804 |       |       |  | Intracellular protein transport. Small GTPase mediated signal transduction.                                         |
| N/A          | N/A                                                          | AK124777  | 1.163 | 0.587 |       |       |  |                                                                                                                     |
| GSTA3        | glutathione S-transferase A3                                 | NM_000847 | 1.163 | 0.822 |       |       |  | Response to stress. Metabolism.                                                                                     |
| KIAA0611     | KIAA0611 protein                                             | AB014511  | 1.162 | 1.315 |       |       |  | Cation transport. Metabolism.                                                                                       |
| FLJ13639     | hypothetical protein FLJ13639                                | NM_024705 | 1.162 | 0.745 |       |       |  |                                                                                                                     |
| ADRA2C       | alpha-2C-adrenergic receptor                                 | NM_000683 |       |       | 1.162 | 0.51  |  | Activation of MAPK. Signal transduction. G-protein coupled receptor protein signaling pathway. Cell-cell signaling. |
| PNMA1        | paraneoplastic antigen MA1                                   | NM_006029 | 1.161 | 1.032 |       |       |  | Spermatogenesis. Central nervous system development.                                                                |
| PKHD1L1      | fibrocystin L                                                | NM_177531 | 1.161 | 0.553 |       |       |  |                                                                                                                     |
| N/A          | N/A                                                          | AK093047  |       |       | 1.16  | 0.583 |  |                                                                                                                     |
| MRGPRD       | MAS-related GPR, member D"                                   | NM_198923 |       |       | 1.16  | 0.56  |  |                                                                                                                     |
| GLYCAM1      | glycosylation-dependent cell adhesion molecule 1             | AJ489592  |       |       | 1.16  | 0.512 |  |                                                                                                                     |
| ZNF488       | zinc finger protein 488                                      | NM_153034 | 1.159 | 0.844 |       |       |  |                                                                                                                     |
| XAGE-4       | XAGE-4 protein                                               | AJ318895  | 1.159 | 1.325 |       |       |  |                                                                                                                     |
| tpcr86       | putative olfactory receptor                                  | X89676    | 1.159 | 0.702 |       |       |  |                                                                                                                     |
| NTSR1        | neurotensin receptor 1                                       | NM_002531 |       |       | 1.159 | 0.567 |  | Signal transduction. G-protein coupled receptor protein signaling pathway. Synaptic transmission.                   |
| IFNA4        | * interferon, alpha 4"                                       | NM_021068 | 1.159 | 0.704 |       |       |  | Defense response. Cell-cell signaling. Response to virus.                                                           |
| ZFH4         | ZFH4 protein                                                 | BC047745  |       |       | 1.158 | 1.14  |  | Regulation of transcription, DNA-dependent.                                                                         |
| NHS          | Nance-Horan syndrome protein                                 | NM_198270 | 1.158 | 0.594 |       |       |  |                                                                                                                     |
| MAGE-E1c     | N/A                                                          | AB040529  | 1.158 | 0.68  |       |       |  |                                                                                                                     |
| F7           | * coagulation factor VII precursor, isoform a"               | NM_000131 | 1.158 | 0.789 |       |       |  | Proteolysis and peptidolysis. Blood coagulation.                                                                    |
| DKFZp727A071 | hypothetical protein                                         | AL117473  |       |       | 1.158 | 0.475 |  |                                                                                                                     |
| OSTbeta      | organic solute transporter beta                              | NM_178859 | 1.157 | 0.566 |       |       |  |                                                                                                                     |
| NDST3        | N-deacetylase/N-sulfotransferase (heparan glucosaminy) 3     | NM_004784 | 1.157 | 0.811 |       |       |  | Protein amino acid deacetylation. Protein amino acid sulfation.                                                     |
| N/A          | N/A                                                          | AK093145  | 1.157 | 0.645 |       |       |  |                                                                                                                     |
| LOC90353     | LOC90353                                                     | NM_145232 | 1.157 | 0.612 |       |       |  |                                                                                                                     |
| LOC387882    | hypothetical protein                                         | NM_207376 | 1.157 | 1.006 |       |       |  |                                                                                                                     |
| LMO2         | LIM domain only 2                                            | NM_005574 |       |       | 1.157 | 0.723 |  | Development.                                                                                                        |
| OLFML2B      | olfactomedin-like 2B                                         | NM_015441 | 1.156 | 0.665 |       |       |  |                                                                                                                     |
| N/A          | N/A                                                          | AK127606  | 1.156 | 0.448 |       |       |  | Protein amino acid phosphorylation. Signal transduction. Alcohol metabolism. Lipid metabolism.                      |
| N/A          | N/A                                                          | AK098749  | 1.155 | 0.62  |       |       |  |                                                                                                                     |
| FLJ44861     | FLJ44861 protein                                             | NM_207389 |       |       | 1.155 | 0.3   |  |                                                                                                                     |
| DELGEF       | deafness locus associated putative guanine nucleotide exchan | NM_012139 | 1.155 | 0.666 |       |       |  | Signal transduction.                                                                                                |
| SIAT8E       | sialyltransferase 8E                                         | NM_013305 |       |       | 1.154 | 0.583 |  | Carbohydrate metabolism. Protein amino acid glycosylation. Glycosphingolipid biosynthesis.                          |
| PAM          | * peptidylglycine alpha-amidating monooxygenase isoform a, f | NM_000919 | 1.154 | 1.298 |       |       |  | Peptide amidation. Protein modification.                                                                            |

|                |                                                                    |              |       |       |       |       |       |                                                                                                                                               |                                                                        |
|----------------|--------------------------------------------------------------------|--------------|-------|-------|-------|-------|-------|-----------------------------------------------------------------------------------------------------------------------------------------------|------------------------------------------------------------------------|
| N/A            | N/A                                                                | AK125136     |       |       |       | 1.154 | 0.357 |                                                                                                                                               |                                                                        |
| N/A            | unknown                                                            | AF462446     |       |       |       | 1.154 | 0.395 |                                                                                                                                               |                                                                        |
| MST068         | MSTP068                                                            | AF163259     | 1.154 | 1.026 |       |       |       |                                                                                                                                               |                                                                        |
| MGC34799       | hypothetical protein MGC34799                                      | NM_182575    |       |       | 1.154 | 1.09  |       |                                                                                                                                               |                                                                        |
| DEFA1          | defensin, alpha 1 preproprotein*                                   | NM_004084    |       |       |       | 1.154 | 0.319 | Xenobiotic metabolism. Response to pest, pathogen or parasite. Defense response to bacteria. Defense response to fungi.                       |                                                                        |
| SEPT3          | septin 3 isoform B                                                 | NM_019106    |       |       |       | 1.154 | 0.965 | Cytokinesis. Cell cycle.                                                                                                                      |                                                                        |
| ZP4            | zona pellucida glycoprotein 4 preproprotein                        | NM_021186    |       |       | 1.153 | 0.492 |       | Fertilization.                                                                                                                                |                                                                        |
| POLR3C         | polymerase (RNA) III (DNA directed) polypeptide C (62kD)           | NM_006468    | 1.153 | 0.967 |       |       |       | Transcription. Regulation of transcription.                                                                                                   |                                                                        |
| OR2T34         | * olfactory receptor, family 2, subfamily T, member 34*            | NM_001001821 | 1.153 | 0.796 |       |       |       |                                                                                                                                               |                                                                        |
| N/A            | PRO0117                                                            | AF090895     |       |       | 1.153 | 0.972 |       |                                                                                                                                               |                                                                        |
| MGC43036       | hypothetical gene supported by BC031966                            | NM_001004323 |       |       | 1.153 | 0.38  |       |                                                                                                                                               |                                                                        |
| LOC220594      | TL132 protein                                                      | NM_145809    | 1.153 | 0.535 |       |       |       | Ubiquitin-dependent protein catabolism. Ubiquitin cycle.                                                                                      |                                                                        |
| FMO1           | FMO1 protein                                                       | BC047129     |       |       | 1.153 | 0.591 |       | Electron transport.                                                                                                                           |                                                                        |
| EGFL7          | EGF-like-domain, multiple 7*                                       | NM_201446    |       |       |       | 1.153 | 0.267 | Angiogenesis. Blood vessel development. Vasculogenesis. Regulation of cell migration.                                                         |                                                                        |
| DPEP1          | dipeptidase 1 (renal)                                              | NM_004413    |       |       |       | 1.153 | 0.646 | Proteolysis and peptidolysis.                                                                                                                 |                                                                        |
| CHD6           | chromodomain helicase DNA binding protein 6                        | NM_032221    | 1.153 | 1.163 |       |       |       | Chromatin assembly or disassembly.                                                                                                            |                                                                        |
| CDC27          | cell division cycle protein 27                                     | NM_001256    |       |       | 1.153 | 0.467 |       | Mitotic metaphase/anaphase transition. Cell proliferation.                                                                                    |                                                                        |
| CCL3L1         | chemokine (C-C motif) ligand 3-like 1 precursor                    | NM_021006    |       |       |       | 1.153 | 0.554 | Calcium ion homeostasis. Exocytosis. Cell motility. Chemotaxis. Inflammatory response. Cytoskeleton organization.                             |                                                                        |
| RGS13          | regulator of G-protein signalling 13                               | BC058666     | 1.152 | 1.177 |       |       |       | Signal transduction.                                                                                                                          |                                                                        |
| LHFPL2         | lipoma HMGIC fusion partner-like 2                                 | NM_005779    | 1.152 | 0.497 |       |       |       |                                                                                                                                               |                                                                        |
| DIRAS2         | Di-Ras2                                                            | NM_017594    |       |       |       | 1.152 | 0.651 | Small GTPase mediated signal transduction.                                                                                                    |                                                                        |
| N/A            | tissue plasminogen activator                                       | U63828       |       |       |       | 1.151 | 0.613 |                                                                                                                                               |                                                                        |
| LOC91752       | similar to C630007C17Rk protein                                    | NM_194250    | 1.151 | 0.93  |       |       |       |                                                                                                                                               |                                                                        |
| TMPRSS2        | transmembrane protease, serine 2*                                  | NM_005656    |       |       |       | 1.15  | 0.728 | Proteolysis and peptidolysis.                                                                                                                 |                                                                        |
| N/A            | N/A                                                                | AK126025     |       |       |       | 1.15  | 0.545 |                                                                                                                                               |                                                                        |
| N/A            | N/A                                                                | AK125816     | 1.15  | 1.195 |       |       |       |                                                                                                                                               |                                                                        |
| N/A            | SH2 domain-containing phosphatase anchor protein 2d                | AF416904     |       |       | 1.15  | 0.494 |       |                                                                                                                                               |                                                                        |
| N/A            | PRO1084                                                            | AF116621     |       |       |       | 1.15  | 0.601 |                                                                                                                                               |                                                                        |
| KIAA1336       | KIAA1336 protein                                                   | AB037757     | 1.15  | 0.408 |       |       |       |                                                                                                                                               |                                                                        |
| CCR4           | chemokine (C-C motif) receptor 4                                   | NM_005508    |       |       |       | 1.15  | 0.676 | Chemotaxis. Inflammatory response. Signal transduction. G-protein coupled receptor protein signaling pathway.                                 |                                                                        |
| ABCG8          | sterolin 2                                                         | NM_022437    |       |       |       | 1.15  | 0.429 | Transport.                                                                                                                                    |                                                                        |
| N/A            | N/A                                                                | BX161457     |       |       |       | 1.149 | 0.692 |                                                                                                                                               |                                                                        |
| KRTAP4-4       | keratin associated protein 4.4                                     | NM_032524    | 1.149 | 0.573 |       |       |       |                                                                                                                                               |                                                                        |
| HOMER3         | * Homer, neuronal immediate early gene, 3*                         | NM_004838    | 1.149 | 0.758 |       |       |       | Protein targeting. Metabotropic glutamate receptor signaling pathway.                                                                         |                                                                        |
| FLJ42925       | FLJ42925 protein                                                   | NM_198511    |       |       |       | 1.149 | 0.503 |                                                                                                                                               |                                                                        |
| DKFZp686O12114 | hypothetical protein                                               | BX537916     |       |       |       | 1.149 | 0.53  |                                                                                                                                               |                                                                        |
| AP1S2          | adaptor-related protein complex 1 sigma 2 subunit                  | NM_003916    | 1.149 | 1.15  |       |       |       | Transport. Intracellular protein transport. Receptor mediated endocytosis.                                                                    |                                                                        |
| KCNH3          | potassium voltage-gated channel, subfamily H (eag-related), r      | NM_012284    |       |       |       | 1.148 | 0.762 | Two-component signal transduction system. Cation transport. Potassium ion transport.                                                          |                                                                        |
| IL13           | interleukin 13 precursor                                           | NM_002188    | 1.148 | 0.719 |       |       |       | Cell motility. Inflammatory response. Signal transduction. Cell-cell signaling. Cell proliferation.                                           |                                                                        |
| GPR78          | G protein-coupled receptor 78                                      | NM_080819    |       |       | 1.148 | 0.705 |       |                                                                                                                                               |                                                                        |
| CCKAR          | cholecystokinin A receptor                                         | NM_000730    |       |       |       | 1.148 | 0.531 | Smooth muscle contraction. Signal transduction. Positive regulation of cytosolic calcium ion concentration. Response to nutrients. Digestion. |                                                                        |
| SORCS2         | VPS10 domain receptor protein SORCS 2                              | NM_020777    | 1.147 | 0.598 |       |       |       | Intracellular protein transport. Neuropeptide signaling pathway.                                                                              |                                                                        |
| N/A            | hypothetical protein                                               | AL049689     |       |       |       | 1.147 | 0.273 | Cell growth. Cell migration.                                                                                                                  |                                                                        |
| N/A            | N/A                                                                | AK127492     |       |       |       | 1.147 | 0.669 | Cation transport. Potassium ion transport.                                                                                                    |                                                                        |
| LCP1           | L-plastin                                                          | NM_002298    |       |       |       | 1.147 | 0.538 |                                                                                                                                               |                                                                        |
| FAM3B          | family with sequence similarity 3, member B isoform a*             | NM_058186    |       |       |       | 1.147 | 0.625 | Insulin secretion.                                                                                                                            |                                                                        |
| ARHGDI3        | Rho GDP dissociation inhibitor (GDI) gamma                         | NM_001176    | 1.221 | 0.981 |       |       | 1.147 | 0.617                                                                                                                                         | Negative regulation of cell adhesion. Rho protein signal transduction. |
| UBE1DC1        | ubiquitin-activating enzyme E1-domain containing 1 isoform 2       | NM_198329    |       |       | 1.146 | 0.757 |       | L-serine biosynthesis.                                                                                                                        |                                                                        |
| TTPA           | tocopherol (alpha) transfer protein (ataxia (Friedreich-like) with | NM_000370    | 1.146 | 1.084 |       |       |       | Lipid metabolism. Transport.                                                                                                                  |                                                                        |
| N/A            | N/A                                                                | AK097698     |       |       |       | 1.146 | 0.56  |                                                                                                                                               |                                                                        |
| N/A            | PRO1808                                                            | AF118077     | 1.349 | 0.907 | 1.146 | 0.982 |       |                                                                                                                                               |                                                                        |
| KRTAP10-11     | keratin associated protein 10-11                                   | NM_198692    |       |       |       | 1.146 | 0.83  |                                                                                                                                               |                                                                        |
| HIST1H2AE      | * H2A histone family, member A*                                    | NM_021052    | 1.146 | 1.384 |       |       |       | Nucleosome assembly. Chromosome organization and biogenesis.                                                                                  |                                                                        |
| OR5K4          | * olfactory receptor, family 5, subfamily K, member 4*             | NM_001005517 | 1.145 | 1.316 |       |       |       |                                                                                                                                               |                                                                        |
| N/A            | C6orf37                                                            | AF350451     | 1.145 | 0.647 |       |       |       |                                                                                                                                               |                                                                        |
| FLJ00040       | FLJ00040 protein                                                   | AK054561     | 1.145 | 0.667 |       |       |       |                                                                                                                                               |                                                                        |

|              |                                                                  |              |       |       |       |       |       |                                                                                                                                 |
|--------------|------------------------------------------------------------------|--------------|-------|-------|-------|-------|-------|---------------------------------------------------------------------------------------------------------------------------------|
| ETNK2        | ETNK2 protein                                                    | BC010082     | 1.145 | 0.651 |       |       |       |                                                                                                                                 |
| CPB2         | plasma carboxypeptidase B2 isoform a preproprotein               | NM_001872    |       |       |       | 1.145 | 0.614 | Proteolysis and peptidolysis.                                                                                                   |
| N/A          | N/A                                                              | AK125766     |       |       |       | 1.144 | 0.449 |                                                                                                                                 |
| N/A          | N/A                                                              | AK096219     |       |       |       | 1.144 | 0.468 |                                                                                                                                 |
| MTAC2D1      | membrane targeting (tandem) C2 domain containing 1               | NM_152332    |       |       |       | 1.144 | 0.429 | Transport.                                                                                                                      |
| MGC45491     | hypothetical protein MGC45491                                    | NM_153246    | 1.144 | 0.404 |       |       |       |                                                                                                                                 |
| LOC388394    | similar to candidate mediator of the p53-dependent G2 arrest     | NM_203400    |       |       |       | 1.144 | 0.473 |                                                                                                                                 |
| AKR1C4       | * aldo-keto reductase family 1, member C4* " 3-alpha hydroxy     | NM_001818    | 1.144 | 0.768 |       |       |       | Xenobiotic metabolism.                                                                                                          |
| TAF15        | TBP-associated factor 15 isoform 1                               | NM_139215    |       |       | 1.143 | 0.91  |       |                                                                                                                                 |
| PTH2R        | parathyroid hormone receptor 2 precursor                         | NM_005048    |       |       |       | 1.143 | 0.433 | Signal transduction. G-protein coupled receptor protein signaling pathway.                                                      |
| N/A          | N/A                                                              | AK057355     |       |       |       | 1.143 | 0.173 | Protein amino acid phosphorylation. Signal transduction. Alcohol metabolism. Lipid metabolism.                                  |
| KIAA1274     | KIAA1274                                                         | NM_014431    |       |       |       | 1.143 | 0.351 |                                                                                                                                 |
| UNQ430       | RGTR430                                                          | NM_205545    |       |       |       | 1.142 | 0.369 |                                                                                                                                 |
| SYT5         | synaptotagmin V                                                  | NM_003180    |       |       |       | 1.142 | 0.634 | Transport. Synaptic transmission.                                                                                               |
| N/A          | unknown                                                          | U79275       |       |       |       | 1.142 | 0.533 |                                                                                                                                 |
| N/A          | Unknown (protein for IMAGE:4252124)                              | BC017997     | 2.233 | 1.036 |       | 1.142 | 0.452 |                                                                                                                                 |
| N/A          | UHS KERB-like protein                                            | AY360461     |       |       |       | 1.142 | 0.506 |                                                                                                                                 |
| MGC14289     | hypothetical protein MGC14289                                    | NM_080660    | 1.142 | 0.898 |       |       |       |                                                                                                                                 |
| KIAA0653     | KIAA0653 protein                                                 | AB014553     | 1.142 | 0.478 |       |       |       | Immune response. Hyperosmotic response. Signal transduction. Positive regulation of activated T-cell proliferation.             |
| BTNL8        | butyrophilin-like 8                                              | NM_024850    | 1.142 | 0.793 |       |       |       |                                                                                                                                 |
| SLC25A4      | solute carrier family 25 (mitochondrial carrier)Homo sapiens sol | NM_001151    | 1.141 | 0.984 |       |       |       | Mitochondrial genome maintenance. Generation of precursor metabolites and energy. Mitochondrial transport.                      |
| SLC18A1      | SLC18A1 protein                                                  | BC006317     |       |       |       | 1.141 | 0.437 | Monamine transport. Drug transport.                                                                                             |
| POLG         | * polymerase (DNA directed), gamma"                              | NM_002693    |       |       | 1.141 | 0.832 |       | DNA-dependent DNA replication.                                                                                                  |
| PLA2G10      | phospholipase A2, group X"                                       | NM_003561    |       |       |       | 1.141 | 0.425 | Lipid catabolism.                                                                                                               |
| N/A          | N/A                                                              | AK096705     | 1.141 | 0.898 |       |       |       |                                                                                                                                 |
| N/A          | pol protein                                                      | AF109183     | 1.141 | 0.513 |       |       |       |                                                                                                                                 |
| ITH5L        | inter-alpha (globulin) inhibitor H5-like                         | NM_198510    |       |       |       | 1.141 | 0.465 | Hyaluronan metabolism.                                                                                                          |
| FLJ20628     | hypothetical protein FLJ20628                                    | NM_017910    | 1.141 | 0.801 |       |       |       |                                                                                                                                 |
| DTX1         | deltex homolog 1                                                 | NM_004416    | 1     | 0.789 |       | 1.141 | 0.561 | Transcription. Cell surface receptor linked signal transduction. Regulation of Notch signaling pathway. Protein ubiquitination. |
| CD99L2       | CD99L2 protein                                                   | BC025729     | 1.141 | 0.408 |       |       |       |                                                                                                                                 |
| USH1C        | harmonin isoform b3                                              | NM_153676    |       |       |       | 1.14  | 0.568 | Intracellular signaling cascade. Sensory perception. Visual perception. Perception of sound.                                    |
| STEERIN2     | steerin2 protein                                                 | AJ488203     | 1.14  | 0.917 |       |       |       |                                                                                                                                 |
| PEX7         | PEX7 protein                                                     | BC031606     | 1.14  | 0.877 |       |       |       | Protein transport.                                                                                                              |
| N/A          | N/A                                                              | AK095016     | 1.14  | 0.421 |       |       |       |                                                                                                                                 |
| N/A          | unknown                                                          | AF143328     | 1.14  | 0.557 |       |       |       | G-protein coupled receptor protein signaling pathway.                                                                           |
| LOC400451    | hypothetical gene supported by AK075564                          | NM_207446    |       |       |       | 1.14  | 0.512 |                                                                                                                                 |
| DKFZp451P181 | hypothetical proteinDNA DKFZp451P181 (from clone DKFZp-          | BX640730     | 1.14  | 1.059 |       |       |       | Ion transport.                                                                                                                  |
| SKIV2L       | superkiller viralicidic activity 2-like homolog                  | NM_006929    | 1.139 | 1.032 |       |       |       | Regulation of translation.                                                                                                      |
| OLFM2        | olfactomedin 2                                                   | NM_058164    |       |       |       | 1.139 | 0.478 |                                                                                                                                 |
| N/A          | N/A                                                              | AK096379     | 1.139 | 1.039 |       |       |       |                                                                                                                                 |
| N/A          | N/A                                                              | AK000374     | 1.139 | 0.819 |       |       |       |                                                                                                                                 |
| N/A          | RAG2                                                             | AF080577     | 1.139 | 0.895 |       |       |       | DNA recombination. Generation of antibody gene diversity.                                                                       |
| FLJ90586     | hypothetical protein FLJ90586                                    | NM_153345    | 1.139 | 0.483 |       |       |       |                                                                                                                                 |
| UHSKerB      | keratin, ultrahigh sulfur, B"                                    | NM_021046    |       |       |       | 1.138 | 0.515 |                                                                                                                                 |
| THEG         | testicular haploid expressed gene product isoform 1              | NM_016585    |       |       |       | 1.138 | 0.249 | Spermatogenesis. Chaperone-mediated protein complex assembly.                                                                   |
| SLC22A15     | * solute carrier family 22 (organic cation transporter), member  | NM_018420    | 1.138 | 0.665 |       |       |       | Transport.                                                                                                                      |
| FAIM2        | neuromembrane protein 35                                         | NM_012306    | 1.138 | 0.474 | 1.411 | 1.3   |       | Anti-apoptosis.                                                                                                                 |
| CLDN5        | claudin 5                                                        | NM_003277    |       |       |       | 1.138 | 0.404 | Calcium-independent cell-cell adhesion.                                                                                         |
| CCR2         | chemokine (C-C motif) receptor 2 isoform A                       | NM_000647    |       |       |       | 1.138 | 0.337 | Chemotaxis. Inflammatory response. Cellular defense response. Signal transduction.                                              |
| C10orf27     | chromosome 10 open reading frame 27                              | NM_152710    |       |       |       | 1.138 | 0.577 |                                                                                                                                 |
| N/A          | C21orf108                                                        | AF231919     | 1.137 | 0.584 |       |       |       |                                                                                                                                 |
| MST4         | serine/threonine protein kinase MASK                             | NM_016542    | 1.137 | 0.923 |       |       |       | Protein amino acid phosphorylation.                                                                                             |
| FLJ16641     | FLJ16641 protein                                                 | NM_001004316 | 1.137 | 1.484 |       |       |       |                                                                                                                                 |
| EPC2         | enhancer of polycomb homolog 2                                   | NM_015630    | 1.137 | 0.6   |       |       |       |                                                                                                                                 |
| CST7         | cystatin F                                                       | NM_003650    |       |       |       | 1.137 | 0.512 | Immune response.                                                                                                                |
| N/A          | Unknown (protein for IMAGE:4715570)                              | BC020899     | 1.136 | 1.273 |       |       |       |                                                                                                                                 |

|               |                                                              |           |       |       |       |       |       |       |  |                                                                                                                                 |
|---------------|--------------------------------------------------------------|-----------|-------|-------|-------|-------|-------|-------|--|---------------------------------------------------------------------------------------------------------------------------------|
| ITPR2         | * inositol 1,4,5-triphosphate receptor, type 2*              | NM_002223 |       |       | 1.136 | 0.737 |       |       |  | Cation transport. Calcium ion transport. Signal transduction.                                                                   |
| FSTL3         | folliculin-like 3glycoprotein                                | BC005839  | 1.278 | 1.596 |       |       | 1.136 | 0.624 |  |                                                                                                                                 |
| CXorf9        | chromosome X open reading frame 9                            | NM_018990 |       |       |       |       | 1.136 | 0.606 |  |                                                                                                                                 |
| CCL11         | small inducible cytokine A11 precursor                       | NM_002986 |       |       |       |       | 1.136 | 0.767 |  | Protein amino acid phosphorylation. Calcium ion homeostasis. Chemotaxis. Inflammatory response. Cellular defense response.      |
| PLEKHA6       | PLEKHA6 protein                                              | BC010522  |       |       | 1.135 | 0.784 |       |       |  |                                                                                                                                 |
| NGFRAP1       | nerve growth factor receptor (TNFRSF16) associated protein 1 | NM_206915 |       |       |       |       | 1.135 | 0.66  |  | Apoptosis. Development.                                                                                                         |
| N/A           | N/A                                                          | AK125870  |       |       |       |       | 1.135 | 0.348 |  |                                                                                                                                 |
| KIAA0853      | KIAA0853                                                     | NM_015070 |       |       | 1.135 | 0.596 |       |       |  |                                                                                                                                 |
| PKD2          | polycystin 2                                                 | NM_000297 |       |       | 1.134 | 0.754 |       |       |  | Cation transport. Cell-matrix adhesion. Organogenesis.                                                                          |
| N/A           | FGF21                                                        | AY359086  |       |       |       |       | 1.134 | 0.313 |  | Signal transduction. Cell-cell signaling.                                                                                       |
| N/A           | N/A                                                          | AK128224  |       |       |       |       | 1.134 | 0.531 |  |                                                                                                                                 |
| N/A           | N/A                                                          | AK023947  |       |       |       |       | 1.134 | 0.659 |  | Protein amino acid phosphorylation. Signal transduction. Alcohol metabolism. Lipid metabolism.                                  |
| muc20S        | transmembrane mucin MUC20S                                   | AB098731  |       |       |       |       | 1.134 | 0.468 |  |                                                                                                                                 |
| SARDH         | sarcosine dehydrogenase                                      | NM_007101 |       |       | 1.133 | 0.631 |       |       |  | Electron transport. Glycine catabolism.                                                                                         |
| RHOV          | * ras homolog gene family, member V*                         | NM_133639 |       |       | 1.133 | 0.726 |       |       |  | Small GTPase mediated signal transduction.                                                                                      |
| N/A           | Unknown (protein for IMAGE:4070464)                          | BC016719  |       |       | 1.133 | 0.807 |       |       |  |                                                                                                                                 |
| KIAA1510      | KIAA1510 protein                                             | AB040943  |       |       |       |       | 1.133 | 0.558 |  | Phosphate transport. Cell adhesion.                                                                                             |
| KIAA1026      | KIAA1026 protein                                             | AB028949  |       |       | 1.133 | 0.592 |       |       |  |                                                                                                                                 |
| IQCF1         | IQCF1 protein                                                | BC034228  |       |       |       |       | 1.133 | 0.616 |  |                                                                                                                                 |
| DEFB126       | beta defensin 126 preproprotein                              | NM_030931 |       |       |       |       | 1.133 | 0.668 |  | Proteolysis and peptidolysis. Defense response to bacteria.                                                                     |
| MARCKS        | myristoylated alanine-rich protein kinase C substrate        | NM_002356 |       |       | 1.132 | 0.471 |       |       |  | Cell motility.                                                                                                                  |
| DNASE1L1      | DNASE1L1 protein                                             | BC028092  |       |       | 1.132 | 0.503 |       |       |  | DNA catabolism.                                                                                                                 |
| TYR           | tyrosinase precursor                                         | M27160    |       |       |       |       | 1.131 | 0.897 |  | Melanin biosynthesis from tyrosine. Eye pigment biosynthesis. Visual perception. Perception of sound.                           |
| N/A           | N/A                                                          | AK097656  |       |       |       |       | 1.131 | 0.866 |  |                                                                                                                                 |
| MT1E          | metallothionein 1E                                           | NM_175617 |       |       | 1.131 | 0.876 |       |       |  |                                                                                                                                 |
| CXADR         | coxsackie virus and adenovirus receptor precursor            | NM_001338 |       |       | 1.131 | 0.623 |       |       |  |                                                                                                                                 |
| BRS3          | bombesin-like receptor 3                                     | NM_001727 |       |       | 1.131 | 0.793 |       |       |  |                                                                                                                                 |
| ATP11C        | * ATPase, Class VI, type 11C*                                | NM_173694 |       |       |       |       | 1.131 | 0.515 |  | Cation transport.                                                                                                               |
| PCDHX         | protocadherin                                                | AJ564937  |       |       |       |       | 1.13  | 0.797 |  | Protein amino acid phosphorylation. Signal transduction. Alcohol metabolism. Lipid metabolism.                                  |
| MGC39545      | hypothetical protein LOC403312                               | NM_203452 |       |       | 1.13  | 0.745 |       |       |  | Protein amino acid phosphorylation. Signal transduction. Alcohol metabolism. Lipid metabolism.                                  |
| IMAGE:4907098 | beta-1,3-N-acetylglucosaminyltransferase protein*            | NM_138706 |       |       |       |       | 1.13  | 0.674 |  | Protein amino acid phosphorylation. Signal transduction. Alcohol metabolism. Lipid metabolism.                                  |
| FLJ45910      | FLJ45910 protein                                             | NM_207390 | 1.208 | 1.26  |       |       | 1.13  | 0.383 |  |                                                                                                                                 |
| XG            | XG glycoprotein precursor                                    | NM_175569 | 2.48  | 2.057 | 1.129 | 0.68  |       |       |  |                                                                                                                                 |
| SUV39H1       | suppressor of variegation 3-9 homolog 1                      | NM_003173 |       |       | 1.129 | 0.879 |       |       |  | DNA replication and chromosome cycle. Chromatin assembly or disassembly. Chromatin modification.                                |
| N/A           | Unknown (protein for MGC:71925)                              | BC062680  |       |       | 1.129 | 0.725 |       |       |  |                                                                                                                                 |
| LOC51136      | PTD016 protein                                               | NM_016125 |       |       | 1.129 | 0.564 |       |       |  | Protein ubiquitination.                                                                                                         |
| PPP3R2        | protein phosphatase 3 regulatory subunit B, beta isoform*    | NM_147180 |       |       |       |       | 1.128 | 0.506 |  |                                                                                                                                 |
| ATP8A1        | *ATPase, aminophospholipid transporter (APLT), class I, type | NM_006095 |       |       | 1.128 | 0.715 |       |       |  | Cation transport. Metabolism. Aminophospholipid transport.                                                                      |
| PNMT          | phenylethanolamine N-methyltransferase                       | NM_002686 |       |       |       |       | 1.127 | 0.433 |  | Catecholamine biosynthesis.                                                                                                     |
| NXF3          | nuclear RNA export factor 3                                  | NM_022052 |       |       |       |       | 1.127 | 0.637 |  | mRNA processing. mRNA-nucleus export. Protein-nucleus import.                                                                   |
| F9            | coagulation factor IX                                        | NM_000133 |       |       |       |       | 1.127 | 0.46  |  | Proteolysis and peptidolysis. Blood coagulation.                                                                                |
| KIAA1952      | KIAA1952 protein                                             | AB075832  |       |       | 1.126 | 0.916 |       |       |  |                                                                                                                                 |
| KIAA1200      | KIAA1200 protein                                             | AB033026  |       |       | 1.126 | 0.35  |       |       |  |                                                                                                                                 |
| FGD3          | * FGD1 family, member 3*                                     | NM_033086 | 4.055 | 0.766 |       |       | 1.126 | 0.452 |  | Cytoskeleton organization and biogenesis. Regulation of cell shape. Actin cytoskeleton organization and biogenesis.             |
| ALDOB         | aldolase B                                                   | NM_000035 |       |       | 1.126 | 0.652 |       |       |  | Fructose metabolism. Glycolysis.                                                                                                |
| PRDM16        | PR domain containing 16 isoform 1                            | NM_022114 |       |       |       |       | 1.125 | 0.617 |  | Regulation of transcription, DNA-dependent.                                                                                     |
| PF6           | projection protein PF6                                       | NM_206996 |       |       | 1.125 | 0.777 |       |       |  | Transcription.                                                                                                                  |
| NTN1          | netrin 1                                                     | NM_004822 |       |       |       |       | 1.125 | 0.696 |  | Apoptosis. Cell motility. Cell-cell signaling. Neurogenesis.                                                                    |
| KIAA0027      | KIAA0027 protein                                             | D25217    |       |       | 1.125 | 1.06  |       |       |  | Protein biosynthesis. Ion transport.                                                                                            |
| DHRS2         | dehydrogenase/reductase (SDR family) member 2 isoform 1      | NM_182908 |       |       |       |       | 1.125 | 0.602 |  | Carbohydrate metabolism. Metabolism.                                                                                            |
| XYLT2         | xylosyltransferase II                                        | NM_022167 |       |       | 1.124 | 0.532 |       |       |  | Glycosaminoglycan biosynthesis,                                                                                                 |
| TLR3          | toll-like receptor 3                                         | NM_003265 | 1.153 | 1.2   |       |       | 1.124 | 0.807 |  | Inflammatory response. Hyperosmotic response. Signal transduction. Activation of NF-kappaB-inducing kinase. Detection of virus. |
| NBEA          | neurobeachin                                                 | NM_015678 |       |       | 1.124 | 0.693 |       |       |  | Post-Golgi transport.                                                                                                           |
| N/A           | Unknown (protein for IMAGE:4155919)                          | BC027465  |       |       | 1.124 | 0.677 |       |       |  |                                                                                                                                 |
| N/A           | N/A                                                          | AK127147  |       |       |       |       | 1.124 | 0.369 |  |                                                                                                                                 |
| LOC196264     | hypothetical protein LOC196264                               | NM_198275 |       |       | 1.124 | 0.661 |       |       |  |                                                                                                                                 |

|                |                                                                       |              |       |       |       |       |       |       |  |                                                                                                                          |
|----------------|-----------------------------------------------------------------------|--------------|-------|-------|-------|-------|-------|-------|--|--------------------------------------------------------------------------------------------------------------------------|
| GRCA           | * gene rich cluster, A isoform 2"                                     | NM_019858    |       |       | 1.124 | 0.946 |       |       |  | G-protein coupled receptor protein signaling pathway, Protein metabolism                                                 |
| FLJ00113       | FLJ00113 protein                                                      | AK024504     |       |       | 1.124 | 1.132 |       |       |  | Protein amino acid phosphorylation.                                                                                      |
| AQP9           | aquaporin 9                                                           | NM_020980    |       |       |       |       | 1.124 | 0.6   |  | Water transport, Water transport, Purine transport, Immune response.                                                     |
| NR1D2          | * nuclear receptor subfamily 1, group D, member 2"                    | NM_005126    |       |       | 1.123 | 0.876 |       |       |  | Transcription, Regulation of transcription, DNA-dependent, Regulation of transcription, DNA-dependent.                   |
| N/A            | N/A                                                                   | AK025280     |       |       |       |       | 1.123 | 0.695 |  |                                                                                                                          |
| N/A            | GRIP1 protein                                                         | AJ133439     |       |       | 1.123 | 1.17  |       |       |  | Intracellular signaling cascade, Synaptic transmission.                                                                  |
| KLC2L          | kinesin light chain 2-like isoform a                                  | NM_177417    |       |       |       |       | 1.123 | 0.375 |  |                                                                                                                          |
| FP3214         | unknown                                                               | AF447874     |       |       | 1.123 | 0.883 |       |       |  |                                                                                                                          |
| DKFZp686C12204 | hypothetical protein cDNA DKFZp686C12204 (from clone DKFZ BX538331    |              |       |       | 1.123 | 0.618 |       |       |  |                                                                                                                          |
| DKFZp434M1820  | hypothetical protein cDNA DKFZp434M1820 (from clone DKFZ AL136803     |              |       |       | 1.123 | 0.569 |       |       |  | Transport, Mitochondrial transport.                                                                                      |
| CRARF          | precursor of P100 serine protease of Ra-reactive factor               | D17525       |       |       | 1.123 | 0.728 |       |       |  | Proteolysis and peptidolysis, Immune response, Complement activation, Complement activation, classical pathway.          |
| N/A            | N/A                                                                   | AK128511     |       |       |       |       | 1.122 | 0.431 |  | Lipid metabolism, Hormone-mediated signaling, Fatty acid oxidation.                                                      |
| MGC33835       | hypothetical protein MGC33835                                         | NM_182548    | 1.07  | 1.046 | 1.122 | 0.64  |       |       |  |                                                                                                                          |
| CXCL10         | interferon gamma-induced precursor                                    | NM_001565    |       |       | 1.122 | 0.831 |       |       |  | Cell motility, Chemotaxis, Inflammatory response, Cell surface receptor linked signal transduction, Cell-cell signaling. |
| TREM1          | triggering receptor expressed on myeloid cells 1                      | NM_018643    | 1.532 | 1.599 |       |       | 1.121 | 0.803 |  | Humoral immune response, Intracellular signaling cascade.                                                                |
| SSX6           | synovial sarcoma, X breakpoint 6"                                     | NM_173357    |       |       |       |       | 1.121 | 0.755 |  |                                                                                                                          |
| SLC35D3        | SLC35D3 protein                                                       | BC067217     |       |       |       |       | 1.121 | 0.362 |  |                                                                                                                          |
| PPP1R14D       | protein phosphatase 1, regulatory subunit 14D"                        | NM_017726    |       |       |       |       | 1.121 | 0.732 |  |                                                                                                                          |
| N/A            | N/A                                                                   | AK128718     |       |       |       |       | 1.121 | 0.502 |  |                                                                                                                          |
| N/A            | hypothetical protein                                                  | AJ237663     |       |       |       |       | 1.121 | 0.409 |  | Transport.                                                                                                               |
| N/A            | PRO3077                                                               | AF119913     |       |       | 1.121 | 0.637 |       |       |  |                                                                                                                          |
| LOC130951      | hypothetical protein BC014602                                         | NM_138804    |       |       | 1.121 | 0.42  |       |       |  |                                                                                                                          |
| KIAA2027       | KIAA2027 protein                                                      | AB095947     | 1.668 | 0.739 | 1.121 | 0.964 |       |       |  |                                                                                                                          |
| GGLTA4         | gamma-glutamyltransferase-like activity 4                             | NM_080920    |       |       | 1.121 | 0.33  |       |       |  | Amino acid metabolism, Glutathione biosynthesis, Glutathione biosynthesis.                                               |
| ZCHC5          | * zinc finger, CCHC domain containing 5"                              | NM_152694    | 1.252 | 1.265 |       |       | 1.12  | 0.843 |  |                                                                                                                          |
| KIAA1583       | KIAA1583 protein                                                      | AB046803     |       |       | 1.12  | 0.615 |       |       |  |                                                                                                                          |
| CRSP8          | * cofactor required for Sp1 transcriptional activation, subunit 8     | NM_004269    |       |       |       |       | 1.12  | 0.633 |  | Transcription initiation from RNA polymerase II promoter.                                                                |
| MAGEH1         | * melanoma antigen, family H, 1 protein"                              | NM_014061    |       |       |       |       | 1.119 | 0.859 |  | Apoptosis.                                                                                                               |
| FGF10          | fibroblast growth factor 10 precursor                                 | NM_004465    |       |       | 1.119 | 1.437 |       |       |  | Protein-nucleus import, translocation, Regulation of cell cycle, Response to stress, Signal transduction.                |
| DKFZp586A1123  | hypothetical protein cDNA DKFZp586A1123 (from clone DKFZ AL050181     |              |       |       | 1.119 | 0.891 |       |       |  |                                                                                                                          |
| PI15           | protease inhibitor 15 preproprotein                                   | NM_015886    |       |       | 1.118 | 1.012 |       |       |  |                                                                                                                          |
| NT5C2L1        | * 5'-nucleotidase, cytosolic II-like 1 protein"                       | NM_152729    |       |       | 1.118 | 0.891 |       |       |  |                                                                                                                          |
| N/A            | calcium and DAG-regulated guanine nucleotide exchange fact            | AF081195     |       |       |       |       | 1.118 | 0.607 |  | Small GTPase mediated signal transduction, Ras protein signal transduction.                                              |
| SLC15A1        | solute carrier family 15 (oligopeptide transporter), member 1"        | NM_005073    |       |       |       |       | 1.117 | 0.503 |  | Transport, Oligopeptide transport, Digestion.                                                                            |
| N/A            | Unknown (protein for IMAGE:4813419)                                   | BC037837     |       |       | 1.117 | 0.46  |       |       |  | Neurogenesis, Cell differentiation.                                                                                      |
| N/A            | PRO2289                                                               | AF116698     |       |       | 1.117 | 0.561 |       |       |  |                                                                                                                          |
| GAS            | proprotein                                                            | NM_000805    |       |       |       |       | 1.117 | 0.475 |  | Smooth muscle contraction, Signal transduction.                                                                          |
| TXNDC8         | thioredoxin domain containing 8                                       | NM_001003936 |       |       | 1.116 | 0.794 |       |       |  |                                                                                                                          |
| PART1          | prostate androgen-regulated transcript 1 protein                      | NM_016590    | 2.079 | 2.147 |       |       | 1.116 | 0.558 |  |                                                                                                                          |
| N/A            | TMEM9                                                                 | AY359012     |       |       | 1.116 | 0.605 |       |       |  | Transport.                                                                                                               |
| N/A            | N/A                                                                   | AK090929     |       |       | 1.116 | 0.176 |       |       |  |                                                                                                                          |
| KIAA1653       | KIAA1653 protein                                                      | AB051440     |       |       |       |       | 1.116 | 0.344 |  | Glutamate biosynthesis, Proline catabolism.                                                                              |
| DKFZp686E1183  | hypothetical protein cDNA DKFZp686E1183 (from clone DKFZ BX537393     |              |       |       | 1.116 | 0.854 |       |       |  | Protein amino acid phosphorylation, Signal transduction, Alcohol metabolism, Lipid metabolism.                           |
| DKFZp451F173   | hypothetical protein cDNA DKFZp451F173 (from clone DKFZ AL831982      |              |       |       |       |       | 1.116 | 0.903 |  | Induction of apoptosis, Caspase activation.                                                                              |
| CRYBA4         | * crystallin, beta A4"                                                | NM_001886    |       |       | 1.116 | 0.677 |       |       |  | Visual perception.                                                                                                       |
| C11orf11       | chromosome 11 open reading frame 11                                   | NM_006133    |       |       |       |       | 1.116 | 1.068 |  | Lipid metabolism.                                                                                                        |
| B3GAT1         | beta-1,3-glucuronyltransferase 1"                                     | NM_054025    |       |       | 1.116 | 0.731 |       |       |  | Carbohydrate metabolism, Protein amino acid glycosylation.                                                               |
| MEOX1          | mesenchyme homeo box 1 isoform 1                                      | NM_004527    |       |       | 1.115 | 1.032 |       |       |  | Regulation of transcription, DNA-dependent, Development.                                                                 |
| KCNH4          | potassium voltage-gated channel, subfamily H, member 4"               | NM_012285    |       |       |       |       | 1.115 | 0.545 |  | Two-component signal transduction system (phosphorelay), Cation transport, Potassium ion transport.                      |
| FBXW11         | F-box and WD-40 domain protein 1B isoform C                           | NM_012300    |       |       |       |       | 1.115 | 0.628 |  | Wnt receptor signaling pathway, Protein ubiquitination.                                                                  |
| CASK           | CASK                                                                  | AF035582     |       |       | 1.115 | 1.104 |       |       |  | Protein amino acid phosphorylation, Cell adhesion.                                                                       |
| ATP4A          | ATPase, H <sup>+</sup> /K <sup>+</sup> exchanging, alpha polypeptide" | NM_000704    |       |       |       |       | 1.115 | 0.532 |  | Potassium ion transport, Metabolism, Proton transport.                                                                   |
| OPN1MW         | * opsin 1 (cone pigments), medium-wave-sensitive (color blind         | NM_000513    |       |       | 1.114 | 0.284 |       |       |  | Signal transduction, G-protein coupled receptor protein signaling pathway, Sensory perception, Visual perception.        |
| N/A            | N/A                                                                   | AK123256     |       |       | 1.114 | 0.73  |       |       |  |                                                                                                                          |
| IGF2           | insulin-like growth factor 2 (somatomedin A)                          | NM_000612    |       |       | 1.114 | 0.786 |       |       |  | Regulation of cell cycle, Skeletal development, Imprinting, Development, Physiological process.                          |
| FLJ00260       | FLJ00260 protein                                                      | AK131074     |       |       |       |       | 1.114 | 0.575 |  | Positive regulation of I-kappaB kinase/NF-kappaB cascade.                                                                |

|               |                                                             |              |       |       |       |       |       |       |                                                                                                                                       |
|---------------|-------------------------------------------------------------|--------------|-------|-------|-------|-------|-------|-------|---------------------------------------------------------------------------------------------------------------------------------------|
| DKFZp76112312 | hypothetical protein                                        | AL161971     |       |       |       |       | 1.114 | 0.607 |                                                                                                                                       |
| N/A           | N/A                                                         | AK097925     | 1.113 | 0.747 |       |       |       |       | Protein amino acid phosphorylation. Signal transduction. Alcohol metabolism. Lipid metabolism. Metabolism.                            |
| MGC42090      | hypothetical protein MGC42090                               | NM_152774    | 1.113 | 1.009 |       |       |       |       |                                                                                                                                       |
| MGC11324      | hypothetical protein MGC11324                               | NM_032717    | 1.113 | 0.443 |       |       |       |       | Metabolism.                                                                                                                           |
| GPR89         | GPR89 protein                                               | BC067816     | 1.113 | 0.46  |       |       |       |       | Positive regulation of I-kappaB kinase/NF-kappaB cascade.                                                                             |
| CYP1A1        | cytochrome P450, family 1, subfamily A, polypeptide 1*      | NM_000499    |       |       |       | 1.113 | 0.657 |       | Electron transport. Transport.                                                                                                        |
| B3GALT2       | * UDP-Gal:betaGlcNAc beta 1,3-galactosyltransferase 2*      | BC022507     | 1.904 | 1.263 | 1.113 | 0.754 |       |       | Protein amino acid glycosylation.                                                                                                     |
| AKAP13        | A-kinase anchor protein 13 isoform 1                        | NM_006738    |       |       | 1.113 | 0.981 |       |       |                                                                                                                                       |
| N/A           | PPRR2488                                                    | AY358843     |       |       | 1.112 | 0.567 |       |       | Metabolism. Lipid catabolism.                                                                                                         |
| N/A           | N/A                                                         | AK129701     |       |       | 1.112 | 0.85  |       |       | Protein amino acid phosphorylation. Signal transduction. Alcohol metabolism. Lipid metabolism.                                        |
| N/A           | N/A                                                         | AK094116     |       |       | 1.112 | 0.874 |       |       |                                                                                                                                       |
| KIAA0664      | KIAA0664 protein                                            | NM_015229    |       |       | 1.112 | 1.146 |       |       | Protein biosynthesis. Metabolism.                                                                                                     |
| FLJ16030      | FLJ16030 protein                                            | NM_198494    |       |       | 1.112 | 0.941 |       |       |                                                                                                                                       |
| CD80          | CD80 antigen (CD28 antigen ligand 1, B7-1 antigen)*         | NM_005191    |       |       |       |       | 1.112 | 0.643 | Immune response. Intracellular signaling cascade. Cell-cell signaling. Positive regulation of signal transduction. T-cell activation. |
| C1QTNF3       | C1q and tumor necrosis factor related protein 3             | NM_181435    | 2.694 | 1.892 | 1.112 | 1.086 |       |       | Phosphate transport.                                                                                                                  |
| RAB11FIP2     | RAB11 family interacting protein 2 (class I)                | NM_014904    |       |       | 1.111 | 1.034 |       |       |                                                                                                                                       |
| N/A           | plasminogen-related protein A                               | U67178       |       |       |       |       | 1.111 | 0.433 |                                                                                                                                       |
| N/A           | N/A                                                         | AK128589     |       |       | 1.111 | 0.611 |       |       | Protein folding. Apoptosis, inferred from expression pattern. Spermatogenesis.                                                        |
| N/A           | N/A                                                         | AK090879     |       |       | 1.111 | 0.687 |       |       |                                                                                                                                       |
| MDS018        | hypothetical protein MDS018                                 | NM_021823    |       |       |       |       | 1.111 | 0.365 |                                                                                                                                       |
| KSR2          | kinase suppressor of Ras-2                                  | NM_173598    |       |       | 1.111 | 0.792 |       |       |                                                                                                                                       |
| COMMD9        | COMM domain containing 9                                    | NM_014186    |       |       | 1.111 | 0.706 |       |       |                                                                                                                                       |
| CLECSF2       | * C-type lectin, superfamily member 2*                      | NM_005127    |       |       | 1.111 | 0.619 |       |       | Antimicrobial humoral response.                                                                                                       |
| SPATS2        | * spermatogenesis associated, serine-rich 2*                | NM_023071    |       |       | 1.11  | 0.959 |       |       |                                                                                                                                       |
| N/A           | N/A                                                         | AK027208     |       |       |       |       | 1.11  | 0.342 |                                                                                                                                       |
| KIAA0531      | KIAA0531 protein                                            | AB011103     |       |       | 1.11  | 1.119 |       |       | Organelle organization and biogenesis. Microtubule-based movement.                                                                    |
| INSL6         | insulin-like 6 precursor                                    | NM_007179    |       |       |       |       | 1.11  | 0.64  | Physiological process.                                                                                                                |
| ZNF334        | zinc finger protein 334 isoform b                           | NM_199441    |       |       | 1.109 | 0.296 |       |       | Regulation of transcription, DNA-dependent.                                                                                           |
| KIAA0865      | KIAA0865 protein                                            | AB020672     |       |       | 1.109 | 0.757 |       |       |                                                                                                                                       |
| KIAA0748      | KIAA0748 protein                                            | AB018291     |       |       | 1.109 | 0.402 |       |       |                                                                                                                                       |
| CCL24         | small inducible cytokine A24 precursor                      | NM_002991    |       |       | 1.109 | 1.204 |       |       | Chemotaxis. Inflammatory response. Signal transduction. Cell-cell signaling. Sensory perception.                                      |
| ABCC6         | * ATP-binding cassette, sub-family C, member 6*             | NM_001171    |       |       | 1.109 | 0.429 |       |       | Transport. Transport. Sensory perception. Visual perception. Response to drug.                                                        |
| MMP20         | matrix metalloproteinase 20 preproprotein                   | NM_004771    |       |       | 1.108 | 0.938 |       |       | Proteolysis and peptidolysis.                                                                                                         |
| MGC26979      | hypothetical protein MGC26979                               | NM_153704    |       |       | 1.108 | 1.181 |       |       |                                                                                                                                       |
| FLJ23554      | hypothetical protein FLJ23554 isoform 1                     | NM_024806    |       |       | 1.108 | 0.166 |       |       |                                                                                                                                       |
| DKFZp779M2348 | hypothetical protein                                        | BX640689     |       |       |       |       | 1.108 | 0.412 | Regulation of striated muscle contraction. Muscle development.                                                                        |
| C21orf86      | chromosome 21 open reading frame 86                         | NM_153454    | 1.389 | 0.547 |       |       | 1.108 | 0.832 |                                                                                                                                       |
| N/A           | N/A                                                         | AK128065     |       |       |       |       | 1.107 | 0.347 | Microtubule-based movement.                                                                                                           |
| N/A           | N/A                                                         | AK090911     |       |       |       |       | 1.107 | 0.386 |                                                                                                                                       |
| MGC10992      | hypothetical protein LOC92922                               | NM_033212    |       |       | 1.107 | 0.76  |       |       |                                                                                                                                       |
| FBL           | fibrillarin                                                 | BC019260     |       |       |       |       | 1.107 | 0.5   | rRNA processing.                                                                                                                      |
| DKFZp667B0210 | early B-cell factor 3                                       | NM_001005463 |       |       | 1.107 | 0.734 |       |       | Regulation of transcription, DNA-dependent. Development.                                                                              |
| BPY2B         | * basic charge, Y-linked, 2B*                               | NM_001002760 |       |       | 1.107 | 0.349 |       |       | Fertilization.                                                                                                                        |
| ZNF266        | ZNF266 protein                                              | BC017407     |       |       | 1.106 | 0.554 |       |       | Regulation of transcription, DNA-dependent.                                                                                           |
| TSGA10        | * testis specific, 10*                                      | NM_025244    |       |       | 1.106 | 0.51  |       |       | Spermatogenesis.                                                                                                                      |
| TLR9          | toll-like receptor 9 isoform B                              | NM_138688    |       |       |       |       | 1.106 | 0.577 | Inflammatory response. Defense response to bacteria.                                                                                  |
| PRF1          | perforin 1 precursor                                        | NM_005041    |       |       |       |       | 1.106 | 0.347 | Programmed cell death, transformed cells. Cellular defense response. Pathogenesis. Cytolysis.                                         |
| N/A           | HGS_RE408                                                   | AY359108     |       |       |       |       | 1.106 | 0.27  |                                                                                                                                       |
| TTL           | tubulin tyrosine ligase                                     | NM_153712    |       |       | 1.105 | 0.815 |       |       | Protein modification.                                                                                                                 |
| N/A           | interferon-induced protein with tetratricopeptide repeats 1 | BT006667     |       |       |       |       | 1.105 | 0.572 | Immune response.                                                                                                                      |
| N/A           | N/A                                                         | AK127601     |       |       |       |       | 1.105 | 0.369 |                                                                                                                                       |
| N/A           | hypothetical protein                                        | AF429967     |       |       | 1.105 | 1     |       |       |                                                                                                                                       |
| FNDC5         | fibronectin type III domain containing 5                    | NM_153756    |       |       |       |       | 1.105 | 0.56  |                                                                                                                                       |
| ATP1A2        | Na+/K+ -ATPase alpha 2 subunit proprotein                   | NM_000702    |       |       |       |       | 1.105 | 0.395 | Potassium ion transport. Sodium ion transport. Metabolism. ATP hydrolysis coupled proton transport.                                   |
| TBX10         | T-box 10                                                    | NM_005995    |       |       |       |       | 1.104 | 0.28  | Transcription. Morphogenesis.                                                                                                         |
| N/A           | Unknown (protein for MGC:71640)                             | BC063295     |       |       | 1.104 | 0.286 |       |       |                                                                                                                                       |



|                |                                                                  |           |       |       |       |       |       |       |       |       |                                                                                                                             |
|----------------|------------------------------------------------------------------|-----------|-------|-------|-------|-------|-------|-------|-------|-------|-----------------------------------------------------------------------------------------------------------------------------|
| KIAA0773       | KIAA0773 gene product                                            | NM_014690 |       |       | 1.104 | 0.565 |       |       |       |       |                                                                                                                             |
| ID4            | * inhibitor of DNA binding 4, dominant negative helix-loop-helix | NM_001546 |       |       | 1.104 | 0.979 |       |       |       |       | Regulation of transcription.                                                                                                |
| CYYR1          | cysteine and tyrosine-rich 1 protein precursor                   | NM_052954 | 1.032 | 0.832 | 1.104 | 0.778 |       |       |       |       |                                                                                                                             |
| MGC51082       | hypothetical protein MGC51082                                    | NM_182498 |       |       | 1.103 | 0.637 |       |       |       |       |                                                                                                                             |
| N/A            | N/A                                                              | AK123987  |       |       |       |       |       |       | 1.102 | 0.384 |                                                                                                                             |
| KIAA1232       | KIAA1232 protein                                                 | AB033058  |       |       |       |       | 1.102 | 0.588 |       |       | Negative regulation of cell proliferation.                                                                                  |
| FP6765         | unknown                                                          | AF495727  |       |       |       |       |       |       | 1.102 | 0.618 |                                                                                                                             |
| FLJ00179       | FLJ00179 protein                                                 | AK074108  |       |       | 1.102 | 0.529 |       |       |       |       |                                                                                                                             |
| DKFZp779N1944  | hypothetical protein cDNA DKFZp779N1944 (from clone DKFZ)        | BX538100  | 1.453 | 1.076 | 1.102 | 0.799 |       |       |       |       |                                                                                                                             |
| ACSL1          | acyl-CoA synthetase long-chain family member 1                   | NM_001995 |       |       | 1.102 | 0.979 |       |       |       |       | Lipid metabolism. Fatty acid metabolism. Digestion.                                                                         |
| RAD51AP1       | RAD51AP1 protein                                                 | BC016330  |       |       | 1.101 | 0.543 |       |       |       |       | DNA repair.                                                                                                                 |
| N/A            | N/A                                                              | AK027500  |       |       |       |       |       |       | 1.101 | 0.401 |                                                                                                                             |
| LOC204010      | LOC204010 protein                                                | BC058822  |       |       | 1.101 | 1.014 |       |       |       |       |                                                                                                                             |
| BMX            | BMX non-receptor tyrosine kinase                                 | NM_203281 |       |       |       |       |       |       | 1.101 | 0.498 | Protein amino acid phosphorylation. Intracellular signaling cascade. Mesoderm development.                                  |
| N/A            | N/A                                                              | AY203941  |       |       |       |       |       |       | 1.1   | 0.338 |                                                                                                                             |
| MTNR1A         | melatonin receptor Mel1a                                         | AF435588  |       |       | 1.1   | 0.475 |       |       |       |       | Signal transduction. G-protein signaling, coupled to cyclic nucleotide second messenger. Mating behavior. Circadian rhythm. |
| LGALS3BP       | galectin 3 binding protein                                       | NM_005567 |       |       | 1.1   | 0.605 |       |       |       |       | Cellular defense response. Cell adhesion. Signal transduction.                                                              |
| N/A            | E2F-5                                                            | U31556    | 1.04  | 1.294 | 1.099 | 0.622 |       |       |       |       | Regulation of cell cycle. Regulation of transcription, DNA-dependent.                                                       |
| N/A            | N/A                                                              | AK128181  |       |       |       |       |       |       | 1.099 | 0.597 | Protein amino acid phosphorylation. Signal transduction. Alcohol metabolism. Lipid metabolism.                              |
| HSPB7          | * heat shock 27kDa protein family, member 7 (cardiovascular)     | NM_014424 | 2.295 | 1.9   | 1.099 | 0.923 |       |       |       |       | Protein folding. Response to unfolded protein. Regulation of heart contraction rate.                                        |
| GAGED2         | * G antigen, family D, 2 isoform 1c                              | NM_133431 |       |       |       |       | 1.099 | 0.62  |       |       |                                                                                                                             |
| FLJ14494       | hypothetical protein FLJ14494                                    | BC014131  |       |       | 1.099 | 0.882 |       |       |       |       | RNA processing.                                                                                                             |
| FLJ00311       | FLJ00311 protein                                                 | AK090413  |       |       |       |       | 1.099 | 1.025 |       |       | Glutathione biosynthesis.                                                                                                   |
| DKFZP434O047   | DKFZP434O047 protein                                             | NM_015594 | 1.295 | 1.051 |       |       |       |       | 1.099 | 0.422 |                                                                                                                             |
| AIM1           | non-lens beta gamma-crystallin like protein                      | U83115    |       |       | 1.099 | 0.871 |       |       |       |       |                                                                                                                             |
| PDE4D          | cAMP-specific phosphodiesterase 4D                               | NM_006203 |       |       | 1.098 | 1.144 |       |       |       |       | Signal transduction. Cyclic nucleotide metabolism.                                                                          |
| CTNMB1         | * catenin (cadherin-associated protein), beta 1, 88kDa           | NM_001904 |       |       | 1.098 | 0.594 |       |       |       |       | Transcription. Cell adhesion. Wnt receptor signaling pathway.                                                               |
| PRTFDC1        | phosphoribosyl transferase domain containing 1                   | NM_020200 |       |       | 1.097 | 0.956 |       |       |       |       | Purine ribonucleoside salvage. Nucleoside metabolism.                                                                       |
| N-cym          | N/A                                                              | S49953    |       |       |       |       |       |       | 1.097 | 0.659 | Development.                                                                                                                |
| N/A            | ESRM828                                                          | AY358534  | 1.085 | 1.379 |       |       | 1.097 | 0.819 |       |       |                                                                                                                             |
| N/A            | N/A                                                              | AK127359  |       |       | 1.097 | 0.817 |       |       |       |       | Protein amino acid phosphorylation. Signal transduction. Alcohol metabolism. Lipid metabolism.                              |
| MGC4266        | hypothetical protein MGC4266                                     | NM_032680 |       |       | 1.097 | 0.523 |       |       |       |       |                                                                                                                             |
| KCNK2          | Shaw-related voltage-gated potassium channel protein 2 isoform   | NM_139136 |       |       |       |       | 1.097 | 0.825 |       |       | Cation transport. Potassium ion transport.                                                                                  |
| CSF3R          | colony stimulating factor 3 receptor isoform c precursor         | NM_156039 |       |       |       |       |       |       | 1.097 | 0.442 | Defense response. Cell adhesion. Signal transduction.                                                                       |
| TRPC6          | * transient receptor potential cation channel, subfamily C, men  | NM_004621 |       |       | 1.095 | 0.703 |       |       |       |       | Cation transport. Calcium ion transport.                                                                                    |
| NYD-SP18       | testes development-related NYD-SP18                              | NM_032599 |       |       |       |       |       |       | 1.095 | 0.752 |                                                                                                                             |
| N/A            | N/A                                                              | AK127144  |       |       |       |       | 1.095 | 0.221 |       |       |                                                                                                                             |
| DNMT3L         | cytosine-5-methyltransferase 3-like protein isoform 1            | NM_013369 |       |       |       |       |       |       | 1.095 | 0.381 | DNA methylation. Imprinting. Spermatogenesis.                                                                               |
| CACNA1G        | voltage-dependent calcium channel alpha 1G subunit isoform       | NM_198396 |       |       | 1.095 | 0.493 |       |       |       |       | Cation transport. Calcium ion transport.                                                                                    |
| N/A            | unknown                                                          | AF452719  |       |       | 1.094 | 0.943 |       |       |       |       |                                                                                                                             |
| HABP2          | hyaluron binding protein 2                                       | NM_004132 |       |       | 1.094 | 0.989 |       |       |       |       | Proteolysis and peptidolysis. Cell adhesion.                                                                                |
| DKFZp564A026   | hypothetical protein cDNA DKFZp564A026 (from clone DKFZ)         | AL050367  |       |       |       |       | 1.094 | 0.638 |       |       |                                                                                                                             |
| SOSTDC1        | cystine knot-containing secreted protein                         | NM_015464 |       |       |       |       | 1.093 | 0.699 |       |       | Wnt receptor signaling pathway.                                                                                             |
| SLC15A3        | solute carrier family 15, member 3*                              | NM_016582 |       |       |       |       |       |       | 1.093 | 0.733 | Oligopeptide transport.                                                                                                     |
| KIAA2011       | KIAA2011 protein                                                 | AB095931  |       |       |       |       |       |       | 1.093 | 0.632 |                                                                                                                             |
| GMNN           | geminin                                                          | NM_015895 |       |       | 1.093 | 0.461 |       |       |       |       | Negative regulation of DNA replication. Negative regulation of cell cycle.                                                  |
| DKFZp451P134   | hypothetical protein cDNA DKFZp451P134 (from clone DKFZ)         | AL832032  |       |       |       |       | 1.093 | 0.557 |       |       |                                                                                                                             |
| COMMD3         | COMM domain containing 3                                         | BC022898  |       |       | 1.093 | 0.401 |       |       |       |       | Two-component signal transduction system.                                                                                   |
| AANAT          | arylalkylamine N-acetyltransferase                               | NM_001088 |       |       |       |       |       |       | 1.093 | 0.566 | Circadian rhythm.                                                                                                           |
| CNR1           | central cannabinoid receptor isoform b                           | NM_033181 |       |       |       |       |       |       | 1.092 | 0.697 | Signal transduction. G-protein signaling, coupled to cyclic nucleotide second messenger. Behavior.                          |
| VTI1A          | SNARE Vti1a-beta protein                                         | NM_145206 |       |       | 1.091 | 0.885 |       |       |       |       |                                                                                                                             |
| DKFZp686C07187 | hypothetical protein                                             | BX640713  |       |       |       |       |       |       | 1.091 | 0.488 | Regulation of transcription, DNA-dependent.                                                                                 |
| CLECSF5        | * C-type lectin, superfamily member 5*                           | NM_013252 |       |       | 1.091 | 0.636 |       |       |       |       | Cellular defense response. Signal transduction.                                                                             |
| CCL28          | small inducible cytokine A28 precursor                           | NM_019846 |       |       | 1.091 | 0.988 |       |       |       |       | Chemotaxis. Immune response. Sensory perception.                                                                            |
| SULT4A1        | sulfotransferase family 4A, member 1 isoform b*                  | NM_176874 |       |       |       |       |       |       | 1.09  | 0.594 | Lipid metabolism. Steroid metabolism.                                                                                       |
| OPRK1          | opioid receptor, kappa 1*                                        | NM_000912 |       |       |       |       |       |       | 1.09  | 0.963 | Immune response. Signal transduction. G-protein coupled receptor protein signaling pathway.                                 |

|               |                                                                   |              |       |       |       |       |       |       |       |                                                                                                                               |
|---------------|-------------------------------------------------------------------|--------------|-------|-------|-------|-------|-------|-------|-------|-------------------------------------------------------------------------------------------------------------------------------|
| MGC33367      | hypothetical protein MGC32905                                     | NM_144602    |       |       |       |       |       | 1.09  | 0.437 |                                                                                                                               |
| KIAA2036      | KIAA2036 protein                                                  | AB111888     |       |       |       |       |       | 1.09  | 0.366 | Protein amino acid phosphorylation. Signal transduction. Alcohol metabolism. Lipid metabolism.                                |
| FLJ25102      | hypothetical protein FLJ25102                                     | NM_182626    |       |       | 1.09  | 0.443 |       |       |       | Protein amino acid phosphorylation. Signal transduction. Alcohol metabolism. Lipid metabolism.                                |
| FLJ10199      | FLJ10199 protein                                                  | BC005177     | 1.051 | 0.772 | 1.09  | 1.047 |       |       |       |                                                                                                                               |
| RERG          | * RAS-like, estrogen-regulated, growth inhibitor*                 | NM_032918    |       |       |       | 1.089 | 0.762 |       |       | Small GTPase mediated signal transduction. Negative regulation of cell proliferation. Response to hormone stimulus.           |
| N/A           | N/A                                                               | M19734       |       |       |       | 1.089 | 1.016 |       |       |                                                                                                                               |
| LOC165186     | similar to RIKEN cDNA 4632412N22 gene                             | NM_199280    |       |       |       |       | 1.089 | 0.498 |       | Mitotic chromosome condensation.                                                                                              |
| CXCL5         | chemokine (C-X-C motif) ligand 5 precursor                        | NM_002994    |       |       | 1.089 | 0.853 |       |       |       | Chemotaxis. Inflammatory response. Signal transduction. Cell-cell signaling. Positive regulation of cell proliferation.       |
| C9orf127      | chromosome 9 open reading frame 127                               | NM_016446    |       |       |       |       | 1.089 | 0.484 |       |                                                                                                                               |
| UBD           | diubiquitin                                                       | NM_006398    |       |       |       |       |       | 1.088 | 0.636 | Proteolysis and peptidolysis. Ubiquitin cycle. Antimicrobial humoral response.                                                |
| TLR7          | toll-like receptor 7                                              | AF240467     |       |       | 1.088 | 0.96  |       |       |       | Protein amino acid phosphorylation. Signal transduction.                                                                      |
| RNF29         | ring finger protein 29 isoform 2                                  | NM_033058    |       |       |       |       | 1.088 | 0.921 |       | Signal transduction. Protein ubiquitination.                                                                                  |
| RASIP1        | Ras-interacting protein 1                                         | NM_017805    |       |       |       |       |       | 1.088 | 0.335 | Signal transduction.                                                                                                          |
| N/A           | CD24 antigen (small cell lung carcinoma cluster 4 antigen)        | BC007674     |       |       | 1.088 | 0.416 |       |       |       | Humoral immune response.                                                                                                      |
| LOC158435     | hypothetical protein BC008050                                     | NM_138497    |       |       |       |       |       | 1.088 | 0.407 |                                                                                                                               |
| KIAA1760      | KIAA1760 protein                                                  | AB051547     |       |       |       |       |       | 1.088 | 0.473 | Protein amino acid phosphorylation. Protein kinase cascade.                                                                   |
| IKBKE         | IKK-related kinase epsilon                                        | NM_014002    |       |       |       |       |       | 1.088 | 0.651 | Protein amino acid phosphorylation. Immune response. Positive regulation of I-kappaB kinase/NF-kappaB cascade.                |
| HNRPK         | heterogeneous nuclear ribonucleoprotein K isoform a               | NM_002140    | 1.159 | 1.519 | 1.088 | 1.041 |       |       |       |                                                                                                                               |
| FOXJ1         | forkhead box J1                                                   | BC046460     |       |       |       |       |       | 1.088 | 0.497 | Transcription. Regulation of transcription, DNA-dependent. Spermatogenesis.                                                   |
| PTPN7         | * protein tyrosine phosphatase, non-receptor type 7 isoform 2*    | NM_080588    | 1.635 | 1.685 |       |       |       | 1.087 | 0.618 | Protein amino acid dephosphorylation.                                                                                         |
| N/A           | Unknown (protein for IMAGE:4248887)                               | BC017893     |       |       |       |       |       | 1.087 | 0.433 |                                                                                                                               |
| N/A           | N/A                                                               | AK128004     | 1.014 | 1.096 | 1.087 | 0.659 |       |       |       |                                                                                                                               |
| MGC45922      | MGC45922 protein                                                  | BC033237     |       |       |       |       |       | 1.087 | 0.373 |                                                                                                                               |
| MGC35434      | LOC148872 protein                                                 | NM_198543    |       |       |       |       |       | 1.087 | 0.479 |                                                                                                                               |
| LOC399888     | LOC399888 protein                                                 | BC065704     |       |       | 1.087 | 0.664 |       |       |       |                                                                                                                               |
| IFI30         | interferon gamma-inducible protein 30                             | AF401212     |       |       |       |       |       | 1.087 | 0.357 |                                                                                                                               |
| FLJ00325      | FLJ00325 protein                                                  | AK090417     |       |       |       |       |       | 1.087 | 0.884 | Protein amino acid phosphorylation. Signal transduction. Alcohol metabolism. Lipid metabolism.                                |
| DKFZp586M0622 | hypothetical proteincDNA DKFZp586M0622 (from clone DKFZ: AL117396 |              |       |       | 1.087 | 0.541 |       |       |       |                                                                                                                               |
| DKFZp434K028  | hypothetical proteincDNA DKFZp434K028 (from clone DKFZ: AL117582  |              |       |       | 1.087 | 0.855 |       |       |       |                                                                                                                               |
| ZBTB2         | zinc finger and BTB domain containing 2                           | NM_020861    | 1.161 | 1.019 | 1.086 | 0.798 |       |       |       | Regulation of transcription, DNA-dependent.                                                                                   |
| N/A           | N/A                                                               | AK128308     |       |       |       |       |       | 1.086 | 0.215 |                                                                                                                               |
| MTCH1         | MTCH1 protein                                                     | BC040659     |       |       | 1.086 | 0.827 |       |       |       | Transport. Caspase activation. Regulation of signal transduction. Positive regulation of apoptosis.                           |
| KRTHA3B       | type I hair keratin 3B                                            | BC009971     |       |       |       |       |       | 1.086 | 0.476 |                                                                                                                               |
| CYP1B1        | * cytochrome P450, family 1, subfamily B, polypeptide 1*          | NM_000104    |       |       | 1.086 | 0.83  |       |       |       | Eye morphogenesis. Electron transport. Visual perception.                                                                     |
| N/A           | CRB1 isoform III                                                  | AY043323     |       |       | 1.085 | 1.067 |       |       |       | Cell adhesion. Establishment and/or maintenance of cell polarity. Cell-cell signaling. Sensory perception. Visual perception. |
| MCC           | MCC                                                               | BX537952     |       |       | 1.085 | 0.943 |       |       |       | Cell cycle. Signal transduction. Negative regulation of cell cycle.                                                           |
| FLJ33590      | hypothetical protein FLJ33590                                     | NM_173821    |       |       |       |       |       | 1.085 | 0.434 |                                                                                                                               |
| COBLL1        | COBL-like 1                                                       | NM_014900    |       |       | 1.085 | 1.622 |       |       |       |                                                                                                                               |
| PTP4A3        | protein tyrosine phosphatase type IVA, member 3 isoform 1*        | NM_032611    |       |       |       |       |       | 1.084 | 0.407 | Protein amino acid dephosphorylation.                                                                                         |
| N/A           | N/A                                                               | AK025111     |       |       | 1.084 | 0.816 |       |       |       |                                                                                                                               |
| HYAL1         | hyaluronoglucosaminidase 1 isoform 1                              | NM_007312    |       |       | 1.084 | 1.188 |       |       |       | Carbohydrate metabolism.                                                                                                      |
| ERGIC53       | N/A                                                               | X71661       |       |       | 1.084 | 0.485 |       |       |       | Protein folding. ER to Golgi transport. Blood coagulation. Protein transport.                                                 |
| DKFZp434I245  | hypothetical proteincDNA DKFZp434I245 (from clone DKFZ: AL833931  |              |       |       | 1.084 | 0.929 |       |       |       |                                                                                                                               |
| SCPEP1        | serine carboxypeptidase 1 precursor protein                       | NM_021626    |       |       | 1.083 | 0.697 |       |       |       | Proteolysis and peptidolysis.                                                                                                 |
| OR56A1        | * olfactory receptor, family 56, subfamily A, member 1*           | NM_001001917 |       |       |       |       |       | 1.083 | 0.484 |                                                                                                                               |
| NEB           | nebulin                                                           | NM_004543    |       |       | 1.083 | 1.34  |       |       |       | Somatic muscle development. Regulation of actin filament length.                                                              |
| N/A           | N/A                                                               | AK122631     |       |       |       |       |       | 1.083 | 0.192 |                                                                                                                               |
| N/A           | HSPC107                                                           | AF161370     |       |       |       |       |       | 1.083 | 0.884 |                                                                                                                               |
| GAF3          | FGF-2 activity-associated protein 3                               | AF220235     |       |       | 1.083 | 0.935 |       |       |       |                                                                                                                               |
| CYP2E1        | cytochrome P450, family 2, subfamily E, polypeptide 1*            | NM_000773    |       |       |       |       |       | 1.083 | 0.628 | Electron transport.                                                                                                           |
| N/A           | N/A                                                               | AK001950     |       |       | 1.082 | 1.399 |       |       |       | Protein transport.                                                                                                            |
| ITGB4         | integrin beta 4 isoform 1 precursor                               | NM_000213    |       |       |       |       |       | 1.082 | 0.672 | Cell-matrix adhesion. Integrin-mediated signaling pathway.                                                                    |
| FLJ00041      | FLJ00041 protein                                                  | AK024449     |       |       |       |       |       | 1.082 | 0.617 |                                                                                                                               |
| N/A           | N/A                                                               | AK054957     | 1.081 | 1.258 |       |       |       |       |       |                                                                                                                               |
| FOXN1         | winged-helix nude                                                 | NM_003593    |       |       |       |       |       | 1.081 | 0.234 | Transcription. Defense response. Development. Epidermis development.                                                          |
| CHRNA3        | nicotinic acetylcholine receptor delta polypeptide precursor      | NM_000751    |       |       |       |       |       | 1.081 | 0.402 | Ion transport. Muscle contraction. Signal transduction. Synaptic transmission.                                                |

|               |                                                                  |              |       |       |       |       |       |       |       |                                                                                                                       |
|---------------|------------------------------------------------------------------|--------------|-------|-------|-------|-------|-------|-------|-------|-----------------------------------------------------------------------------------------------------------------------|
| WIG1          | p53 target zinc finger protein isoform 1                         | NM_022470    | 1.08  | 0.49  |       |       |       |       |       |                                                                                                                       |
| NRF1          | nuclear respiratory factor 1                                     | NM_005011    | 1.08  | 1.065 |       |       |       |       |       | Generation of precursor metabolites and energy. Regulation of transcription, DNA-dependent.                           |
| N/A           | hypothetical C4orf11 protein variant 2                           | AY316302     | 1.08  | 0.357 |       |       |       |       |       |                                                                                                                       |
| N/A           | N/A                                                              | AK127224     |       |       |       |       | 1.08  | 0.5   |       |                                                                                                                       |
| KCNJ1         | potassium inwardly-rectifying channel J1 isoform b               | NM_153767    |       |       |       | 1.08  | 0.523 |       |       | Potassium ion transport. Excretion.                                                                                   |
| FST           | folliculin isoform FST317 precursor                              | NM_006350    | 1.08  | 0.639 |       |       |       |       |       | Development. Negative regulation of follicle-stimulating hormone secretion.                                           |
| FLJ42102      | FLJ42102 protein                                                 | NM_001001680 |       |       |       |       |       | 1.08  | 0.7   | Protein amino acid phosphorylation. Signal transduction. Alcohol metabolism. Lipid metabolism.                        |
| FLJ23263      | hypothetical protein FLJ23263                                    | NM_025115    | 1.08  | 0.385 |       |       |       |       |       |                                                                                                                       |
| CRADD         | CASP2 and RIPK1 domain containing adaptor with death dom         | NM_003805    |       |       |       | 1.08  | 1.2   |       |       | Signal transduction. Induction of apoptosis via death domain receptors. Regulation of apoptosis.                      |
| BMI1          | B lymphoma Mo-MLV insertion region                               | NM_005180    | 1.08  | 0.823 |       |       |       |       |       | Regulation of transcription, DNA-dependent. Segment specification. Protein ubiquitination.                            |
| PYY2          | peptide YY, 2 (seminalplasmin)*                                  | NM_021093    |       |       |       |       |       | 1.079 | 0.439 |                                                                                                                       |
| N/A           | Unknown (protein for MGC:59785)                                  | BC053319     | 1.079 | 0.993 |       |       |       |       |       | Cell adhesion.                                                                                                        |
| N/A           | N/A                                                              | AK128416     | 1.079 | 0.757 |       |       |       |       |       |                                                                                                                       |
| N/A           | N/A                                                              | AK027752     | 1.079 | 0.561 |       |       |       |       |       | Protein ubiquitination.                                                                                               |
| N/A           | PRO2219                                                          | AF116694     | 1.079 | 0.906 |       |       |       |       |       | Chemotaxis. Sensory perception.                                                                                       |
| KCNJ13        | potassium inwardly-rectifying channel J13                        | NM_002242    | 1.042 | 1.14  |       |       |       | 1.079 | 0.817 | Potassium ion transport.                                                                                              |
| RNASE7        | ribonuclease 7                                                   | NM_032572    |       | 1.078 | 0.56  |       |       |       |       | Defense response to bacteria. Innate immune response.                                                                 |
| OR52E5        | * olfactory receptor, family 52, subfamily E, member 5*          | NM_001005166 |       | 1.078 | 1.232 |       |       |       |       |                                                                                                                       |
| NOXO1         | NADPH oxidase organizer 1 isoform a                              | NM_144603    |       |       |       |       |       | 1.078 | 0.342 | Intracellular signaling cascade.                                                                                      |
| N/A           | orphan G-protein coupled receptor Dez isoform a                  | U79526       |       |       |       |       |       | 1.078 | 0.683 | Skeletal development. Chemotaxis. Immune response. Signal transduction.                                               |
| N/A           | N/A                                                              | M35069       | 1.078 | 0.614 |       |       |       |       |       |                                                                                                                       |
| N/A           | Unknown (protein for IMAGE:4794937)                              | BC030093     | 1.078 | 0.98  |       |       |       |       |       | Immune response. Synaptic transmission. Central nervous system development. Nerve ensheathment.                       |
| KIAA0799      | KIAA0799 protein                                                 | AB018342     | 1.078 | 0.817 |       |       |       |       |       | Signal transduction.                                                                                                  |
| JAK3          | Janus kinase 3                                                   | NM_000215    |       |       |       |       |       | 1.078 | 0.544 | Protein amino acid phosphorylation. Intracellular signaling cascade. Mesoderm development.                            |
| FLJ45909      | FLJ45909 protein                                                 | NM_198445    | 1.078 | 0.476 |       |       |       |       |       | Protein amino acid phosphorylation. Signal transduction. Alcohol metabolism. Lipid metabolism.                        |
| DKFZp434O0320 | hypothetical protein cDNA DKFZp434O0320 (from clone DKFZ         | AL137562     | 1.078 | 0.907 |       |       |       |       |       |                                                                                                                       |
| COL11A2       | collagen, type XI, alpha 2 isoform 1 preproprotein*              | NM_080680    |       |       |       |       |       | 1.078 | 0.66  | Skeletal development. Phosphate transport. Cell adhesion. Perception of sound. Collagen fibril organization.          |
| CD53          | CD53 antigen                                                     | NM_000560    |       |       |       |       |       | 1.078 | 0.661 | Signal transduction. Antimicrobial humoral response.                                                                  |
| BMP4          | bone morphogenetic protein 4 preproprotein                       | NM_001202    | 1.078 | 0.626 |       |       |       |       |       | Skeletal development. Mesoderm development. Cell differentiation.                                                     |
| RTN4RL1       | reticulin 4 receptor-like 1                                      | NM_178568    |       |       |       |       |       | 1.077 | 0.343 |                                                                                                                       |
| RPA2          | * replication protein A2, 32kDa*                                 | NM_002946    | 1.077 | 0.344 |       |       |       |       |       | DNA-dependent DNA replication.                                                                                        |
| N/A           | Unknown (protein for MGC:75009)                                  | BC063390     |       |       |       |       |       | 1.077 | 0.692 |                                                                                                                       |
| MGC42630      | hypothetical protein MGC42630                                    | NM_175923    |       |       |       |       |       | 1.077 | 0.19  |                                                                                                                       |
| FLJ10970      | hypothetical protein FLJ10970                                    | NM_018286    |       | 1.077 | 0.406 |       |       |       |       |                                                                                                                       |
| DKFZp434E1512 | hypothetical protein cDNA DKFZp434E1512 (from clone DKFZ         | AL157437     |       | 1.077 | 0.572 |       |       |       |       | Protein modification.                                                                                                 |
| C9orf48       | chromosome 9 open reading frame 48                               | NM_194313    | 1.268 | 1.656 |       |       |       | 1.077 | 1.326 |                                                                                                                       |
| SERPINF13     | * serine (or cysteine) proteinase inhibitor, clade B (ovalbumin) | NM_012397    | 1.224 | 1.466 | 1.076 | 0.757 |       |       |       | Response to UV. Regulation of proteolysis and peptidolysis.                                                           |
| PCDH10        | protocadherin beta 10 precursor                                  | NM_018930    |       |       |       |       |       | 1.076 | 0.685 | Cell adhesion. Homophilic cell adhesion. Synaptic transmission. Synaptogenesis. Calcium-dependent cell-cell adhesion. |
| N/A           | N/A                                                              | AK128227     |       |       |       |       |       | 1.076 | 0.598 |                                                                                                                       |
| N/A           | caspase recruitment domain protein 12                            | AF376061     |       |       |       |       | 1.076 | 0.655 |       |                                                                                                                       |
| N/A           | Nck-associated protein NAP5                                      | AB005217     |       |       |       |       | 1.076 | 0.939 |       |                                                                                                                       |
| MAGEB1        | * melanoma antigen, family B, 1*                                 | NM_002363    |       |       |       |       | 1.075 | 0.67  |       |                                                                                                                       |
| HNRNPG-T      | testes-specific heterogenous nuclear ribonucleoprotein G-T       | BC057796     | 1.075 | 0.428 |       |       |       |       |       |                                                                                                                       |
| GDI2          | GDP dissociation inhibitor 2                                     | NM_001494    | 1.075 | 0.777 |       |       |       |       |       | Protein transport. Regulation of GTPase activity.                                                                     |
| FLJ12684      | FLJ12684 protein                                                 | BC067527     |       |       |       |       |       | 1.075 | 0.297 |                                                                                                                       |
| ZNF219        | zinc finger protein 219                                          | NM_016423    | 1.074 | 0.783 |       |       |       |       |       | Regulation of transcription, DNA-dependent.                                                                           |
| N/A           | Unknown (protein for MGC:33652)                                  | BC021741     | 1.074 | 0.738 |       |       |       |       |       |                                                                                                                       |
| DKFZp686K2089 | hypothetical protein cDNA DKFZp686K2089 (from clone DKFZ         | BX537524     | 1.074 | 0.863 |       |       |       |       |       |                                                                                                                       |
| DKFZp568K0524 | hypothetical protein                                             | AL050040     |       |       |       |       |       | 1.074 | 0.367 | Protein amino acid dephosphorylation.                                                                                 |
| SLC1A1        | * solute carrier family 1, member 1*                             | NM_004170    | 1.074 | 1.064 | 1.073 | 0.499 |       |       |       | Transport. Dicarboxylic acid transport. Synaptic transmission. L-glutamate transport.                                 |
| OR10J5        | * olfactory receptor, family 10, subfamily J, member 5*          | NM_001004469 |       | 1.073 | 1.059 |       |       |       |       |                                                                                                                       |
| N/A           | N/A                                                              | AK130204     |       |       |       |       |       | 1.073 | 0.219 |                                                                                                                       |
| MGC16028      | MGC16028 similar to RIKEN cDNA 1700019E19 gene                   | NM_052873    | 1.073 | 1.07  |       |       |       |       |       |                                                                                                                       |
| LOC346673     | STRAB                                                            | NM_182489    | 1.073 | 1.116 |       |       |       |       |       |                                                                                                                       |
| CLCA2         | calcium activated chloride channel 2                             | NM_006536    | 1.073 | 0.641 |       |       |       |       |       | Transport. Chloride transport.                                                                                        |
| ABI3          | NESH protein                                                     | NM_016428    |       |       |       |       |       | 1.073 | 0.775 | Cell motility.                                                                                                        |

|           |                                                                   |              |       |       |       |       |       |       |                                                                                                                         |
|-----------|-------------------------------------------------------------------|--------------|-------|-------|-------|-------|-------|-------|-------------------------------------------------------------------------------------------------------------------------|
| N/A       | N/A                                                               | AK126977     |       |       |       |       | 1.072 | 0.404 |                                                                                                                         |
| FLJ45422  | FLJ45422 protein                                                  | NM_001004349 | 1.072 | 0.935 |       |       |       |       | Antigen presentation. Antigen presentation, endogenous antigen.                                                         |
| FLJ43860  | FLJ43860 protein                                                  | NM_207414    |       |       |       | 1.072 | 0.657 |       |                                                                                                                         |
| CSAG1     | chondrosarcoma associated gene 1 isoform a                        | NM_153478    |       |       |       | 1.072 | 0.823 |       | Response to drug.                                                                                                       |
| CCL19     | small inducible cytokine A19 precursor                            | NM_006274    |       |       |       | 1.072 | 0.486 |       | Calcium ion homeostasis. Chemotaxis. Inflammatory response. Signal transduction. Sensory perception.                    |
| AFAP      | actin filament associated protein                                 | NM_021638    | 1.072 | 1.03  |       |       |       |       |                                                                                                                         |
| TACSTD1   | tumor-associated calcium signal transducer 1 precursor            | NM_002354    | 1.071 | 0.65  |       |       |       |       |                                                                                                                         |
| N/A       | N/A                                                               | AK097971     |       |       |       | 1.071 | 0.33  |       | Positive regulation of cytokine production. Inflammatory response. Cell surface receptor linked signal transduction.    |
| N/A       | PNAS-119                                                          | AF277177     | 1.071 | 1.058 |       |       |       |       |                                                                                                                         |
| MS4A2     | * membrane-spanning 4-domains, subfamily A, member 2* * b         | NM_000139    | 1.123 | 1.379 |       | 1.071 | 1.123 |       | Humoral immune response. Signal transduction. G-protein coupled receptor protein signaling pathway. Cell proliferation. |
| KRTAP10-4 | keratin associated protein 10-4                                   | NM_198687    | 1.298 | 1.52  |       | 1.071 | 0.44  |       |                                                                                                                         |
| UNQ827    | KFLL827                                                           | NM_207469    | 1.07  | 0.874 |       |       |       |       | Defense response to bacteria.                                                                                           |
| LOC284739 | hypothetical protein LOC284739                                    | NM_207349    |       |       |       | 1.07  | 0.42  |       |                                                                                                                         |
| TMOD1     | tropomodulin 1                                                    | NM_003275    |       |       | 1.069 | 0.485 |       |       | Cytoskeleton organization and biogenesis.                                                                               |
| TCP10L    | T-complex 10A-2                                                   | NM_144659    |       |       |       | 1.069 | 0.664 |       |                                                                                                                         |
| MGC33894  | transcript expressed during hematopoiesis 2                       | NM_152914    | 1.069 | 1.042 |       |       |       |       |                                                                                                                         |
| FKBP9L    | similar to FK506 binding protein 9                                | NM_182827    |       |       |       | 1.069 | 0.288 |       | Protein folding.                                                                                                        |
| EBI2      | EBV-induced G protein-coupled receptor 2                          | NM_004951    | 1.187 | 0.848 |       | 1.069 | 0.782 |       | Immune response. Signal transduction. G-protein coupled receptor protein signaling pathway.                             |
| DSG4      | desmoglein 4                                                      | NM_177986    |       | 1.069 | 0.801 |       |       |       |                                                                                                                         |
| DAB2IP    | DAB2 interacting protein                                          | NM_032552    |       | 1.069 | 0.557 |       |       |       |                                                                                                                         |
| CLDN20    | claudin 20                                                        | NM_001001346 |       | 1.069 | 1.328 |       |       |       |                                                                                                                         |
| SH2D4A    | SH2 domain containing 4A                                          | NM_022071    |       | 1.068 | 0.765 |       |       |       | Intracellular signaling cascade.                                                                                        |
| N/A       | PINK1                                                             | AY358957     |       | 1.068 | 0.648 |       |       |       | Protein amino acid phosphorylation. Signal transduction. Alcohol metabolism. Lipid metabolism.                          |
| MGC40069  | hypothetical protein MGC40069                                     | NM_182615    |       |       |       | 1.068 | 0.518 |       |                                                                                                                         |
| LOC375449 | similar to microtubule associated testis specific serine/threonin | NM_198828    |       |       |       | 1.068 | 0.645 |       |                                                                                                                         |
| LOC255177 | LOC255177 protein                                                 | BC031230     | 1.068 | 0.392 |       |       |       |       |                                                                                                                         |
| MGC8685   | tubulin, beta polypeptide paralog*                                | NM_178012    |       |       |       | 1.067 | 0.362 |       | Microtubule-based movement. Protein polymerization.                                                                     |
| LOC285682 | LOC285682 protein                                                 | BC027302     |       |       |       | 1.067 | 0.381 |       |                                                                                                                         |
| PRPS2     | phosphoribosyl pyrophosphate synthetase 2                         | NM_002765    | 1.066 | 0.851 |       |       |       |       | Nucleoside metabolism. Ribonucleoside monophosphate biosynthesis.                                                       |
| N/A       | albumin                                                           | X51365       | 1.066 | 0.812 |       |       |       |       |                                                                                                                         |
| pp9964    | unknown                                                           | AF318381     |       |       |       | 1.065 | 0.575 |       |                                                                                                                         |
| OR4F5     | * olfactory receptor, family 4, subfamily F, member 5*            | NM_001005484 | 1.065 | 0.89  |       |       |       |       |                                                                                                                         |
| FLJ00265  | FLJ00265 protein                                                  | AK122581     | 1.065 | 0.912 |       |       |       |       |                                                                                                                         |
| CGI-07    | CGI-07 protein                                                    | NM_015938    | 1.065 | 1.124 |       |       |       |       |                                                                                                                         |
| RCV1      | recoverin                                                         | NM_002903    | 1.064 | 0.509 |       |       |       |       | Signal transduction. Sensory perception. Visual perception.                                                             |
| N/A       | G2                                                                | U10991       |       |       |       | 1.064 | 1.028 |       |                                                                                                                         |
| N/A       | brain my050 protein                                               | AF063608     |       |       |       | 1.064 | 0.328 |       | Electron transport. Microtubule-based movement. Synaptic transmission.                                                  |
| MCM5      | minichromosome maintenance deficient protein 5                    | NM_006739    | 1.064 | 0.731 |       |       |       |       | Regulation of cell cycle. DNA replication. DNA replication initiation. Transcription.                                   |
| LMOD3     | leiomodrin 3 (fetal)                                              | NM_198271    | 1.064 | 0.689 |       |       |       |       | Protein amino acid phosphorylation. Signal transduction. Alcohol metabolism. Lipid metabolism.                          |
| DEFB105   | * defensin, beta 105*                                             | NM_152250    |       |       |       | 1.064 | 0.36  |       |                                                                                                                         |
| N/A       | N/A                                                               | BC008814     |       |       |       | 1.063 | 0.379 |       |                                                                                                                         |
| N/A       | RVLA1944                                                          | AY358202     |       |       |       | 1.063 | 0.686 |       |                                                                                                                         |
| N/A       | N/A                                                               | AK096928     | 1.063 | 0.55  |       |       |       |       |                                                                                                                         |
| MTMR9     | myotubularin-related protein 9                                    | NM_015458    |       |       |       | 1.063 | 0.876 |       | Protein amino acid phosphorylation. Signal transduction. Alcohol metabolism. Lipid metabolism.                          |
| LST001    | SLTP001                                                           | AF111704     | 1.063 | 0.794 |       |       |       |       |                                                                                                                         |
| KIAA0386  | N/A                                                               | AB002384     | 1.063 | 0.794 |       |       |       |       |                                                                                                                         |
| GAL3ST3   | galactose-3-O-sulfotransferase 3                                  | NM_033036    |       |       |       | 1.063 | 0.515 |       | Monosaccharide metabolism. Sulfur metabolism. Biosynthesis. Oligosaccharide metabolism.                                 |
| FLJ46481  | FLJ46481 protein                                                  | NM_207405    |       |       |       | 1.063 | 0.715 |       |                                                                                                                         |
| N/A       | N/A                                                               | AK000159     | 1.062 | 0.628 |       |       |       |       |                                                                                                                         |
| LOC388906 | LOC388906 protein                                                 | BC039496     |       |       |       | 1.062 | 0.802 |       |                                                                                                                         |
| KIAA0894  | KIAA0894 protein                                                  | AB020701     | 1.062 | 0.614 |       |       |       |       | Protein amino acid phosphorylation. Signal transduction. Alcohol metabolism. Lipid metabolism.                          |
| ASB18     | ankyrin repeat and SOCS box-containing 18                         | NM_212556    | 1.062 | 0.529 |       |       |       |       |                                                                                                                         |
| TULP1     | tubby related protein 1 TULP1                                     | U82468       |       |       |       | 1.061 | 0.453 |       | Sensory perception. Visual perception.                                                                                  |
| sycl      | syntenin                                                          | AF000652     | 1.061 | 0.762 |       |       |       |       | Protein-membrane targeting. Substrate-bound cell migration, cell extension. Intracellular signaling cascade.            |
| LOC284367 | LOC284367 protein                                                 | BC050999     |       |       |       | 1.061 | 0.676 |       |                                                                                                                         |
| KLK9      | kallikrein 9                                                      | NM_012315    |       |       |       | 1.061 | 0.526 |       | Proteolysis and peptidolysis.                                                                                           |

|           |                                                                              |              |       |       |       |       |       |       |       |                                                                                                                                  |
|-----------|------------------------------------------------------------------------------|--------------|-------|-------|-------|-------|-------|-------|-------|----------------------------------------------------------------------------------------------------------------------------------|
| FLJ40113  | FLJ40113 protein                                                             | NM_198079    |       |       |       |       |       | 1.061 | 0.438 |                                                                                                                                  |
| AMOTL2    | angiominin like 2                                                            | NM_016201    | 1.061 | 0.639 |       |       |       |       |       |                                                                                                                                  |
| OR1G1     | olfactory receptor, family 1, subfamily G, member 1*                         | NM_003555    |       |       |       |       |       | 1.06  | 0.625 | Signal transduction. G-protein coupled receptor protein signaling pathway. Perception of smell.                                  |
| N/A       | N/A                                                                          | AK125175     | 1.06  | 1.151 |       |       |       |       |       |                                                                                                                                  |
| MGC13159  | hypothetical protein MGC13159                                                | NM_032927    |       |       |       |       | 1.06  | 0.842 |       |                                                                                                                                  |
| BCORL2    | BCL6 co-repressor-like 2                                                     | NM_173700    |       |       |       |       |       | 1.06  | 0.464 |                                                                                                                                  |
| BCL9      | B-cell CLL/lymphoma 9                                                        | NM_004326    | 1.06  | 0.592 |       |       |       |       |       | Wnt receptor signaling pathway.                                                                                                  |
| ZNF452    | zinc finger protein 452                                                      | NM_052923    |       |       |       |       |       | 1.059 | 0.575 | DNA recombination. Regulation of transcription, DNA-dependent.                                                                   |
| SFMBT1    | Scm-like with four mbt domains 1                                             | NM_001005159 | 1.059 | 0.711 |       |       |       |       |       | Regulation of transcription, DNA-dependent. Regulation of transcription.                                                         |
| NYX       | nyctalopin                                                                   | NM_022567    |       |       |       |       | 1.059 | 0.525 |       | Sensory perception. Visual perception.                                                                                           |
| N/A       | N/A                                                                          | AK130490     |       |       |       |       |       | 1.059 | 0.407 |                                                                                                                                  |
| N/A       | N/A                                                                          | AK126123     |       |       |       |       |       | 1.059 | 0.637 |                                                                                                                                  |
| N/A       | N/A                                                                          | AK096466     | 1.059 | 1.355 |       |       |       |       |       |                                                                                                                                  |
| N/A       | cystatin 9                                                                   | AF494536     |       |       |       |       |       | 1.059 | 0.558 |                                                                                                                                  |
| HT008     | uncharacterized hypothalamus protein HT008                                   | NM_018469    | 1.059 | 0.415 |       |       |       |       |       | Phosphoenolpyruvate-dependent sugar phosphotransferase system.                                                                   |
| FSHPRH1   | follicle-stimulating hormone primary response protein 1                      | NM_006733    |       |       |       |       |       | 1.059 |       | Spermatogenesis. Female gamete generation. Sex differentiation.                                                                  |
| CNP       | * 2',3'-cyclic nucleotide 3' phosphodiesterase*                              | NM_033133    | 1.059 | 0.592 |       |       |       |       |       | Synaptic transmission. Cyclic nucleotide catabolism.                                                                             |
| ANXA9     | annexin A9                                                                   | NM_003568    | 1.059 | 0.627 |       |       |       |       |       | Actin filament organization. Cell-cell adhesion.                                                                                 |
| SCOC      | short coiled-coil protein                                                    | NM_032547    | 1.058 | 0.823 |       |       |       |       |       |                                                                                                                                  |
| N/A       | N/A                                                                          | AK094114     | 1.058 | 0.502 |       |       |       |       |       |                                                                                                                                  |
| UNQ830    | ASCL830                                                                      | NM_206895    | 1.057 | 0.955 |       |       |       |       |       |                                                                                                                                  |
| TAF3      | TAF3 protein isoform 2                                                       | NM_001004440 |       |       |       |       |       | 1.057 | 0.76  |                                                                                                                                  |
| N/A       | N/A                                                                          | AK094480     | 1.057 | 1.517 |       |       |       |       |       |                                                                                                                                  |
| CORO2A    | coronin, actin binding protein, 2A*                                          | NM_003389    |       |       |       |       |       | 1.057 | 0.407 | Glutamine biosynthesis. Nitrogen compound metabolism. Intracellular signaling cascade.                                           |
| AIPL1     | aryl hydrocarbon receptor interacting protein-like 1                         | NM_014336    | 1.057 | 0.749 |       |       |       |       |       | Protein folding. Sensory perception. Visual perception.                                                                          |
| N/A       | N/A                                                                          | AK025278     |       |       |       |       | 1.056 | 0.987 |       |                                                                                                                                  |
| N/A       | unknown                                                                      | AF119045     |       |       |       |       |       | 1.056 | 0.603 | Protein amino acid dephosphorylation.                                                                                            |
| NCAM1     | NCAM1 protein                                                                | BC014205     |       |       |       |       |       | 1.054 | 0.837 | Cell adhesion. Cell-cell signaling. Synaptic transmission.                                                                       |
| FGG       | fibrinogen, gamma chain isoform gamma-B precursor*                           | NM_021870    |       |       |       |       |       | 1.054 | 0.761 | Angiogenesis. Signal transduction. Regulation of blood pressure. Positive regulation of cell proliferation. Platelet activation. |
| CYP2F1    | cytochrome P450, family 2, subfamily F, polypeptide 1*                       | NM_000774    |       |       |       |       |       | 1.054 | 0.655 | Electron transport.                                                                                                              |
| AARSL     | alanyl-tRNA synthetase like                                                  | NM_020745    | 1.054 | 0.705 |       |       |       |       |       | Protein amino acid phosphorylation. Signal transduction. Alcohol metabolism. Lipid metabolism.                                   |
| TMEM2     | transmembrane protein 2                                                      | NM_013390    | 1.053 | 0.623 |       |       |       |       |       |                                                                                                                                  |
| SLC7A7    | * solute carrier family 7 (cationic amino acid transporter, y+ sy; NM_003982 | NM_003982    | 1.053 | 1.085 |       |       |       |       |       | Protein complex assembly. Amino acid metabolism. Amino acid transport.                                                           |
| PITX1     | paired-like homeodomain transcription factor 1                               | NM_002653    |       |       |       |       | 1.053 | 0.695 |       | Skeletal development. Regulation of transcription, DNA-dependent. Morphogenesis.                                                 |
| PDE4A     | phosphodiesterase 4A, cAMP-specific (phosphodiesterase E2                    | NM_006202    |       |       |       |       |       | 1.053 | 0.633 | Signal transduction. Signal transduction. Cyclic nucleotide metabolism.                                                          |
| NONO      | * non-POU domain containing, octamer-binding*                                | NM_007363    |       |       |       |       | 1.053 | 0.753 |       | mRNA processing. RNA splicing.                                                                                                   |
| NNT       | nicotinamide nucleotide transhydrogenase                                     | NM_012343    |       |       |       |       | 1.053 | 0.462 |       | Electron transport. Proton transport.                                                                                            |
| FLJ11078  | hypothetical protein FLJ11078                                                | NM_018316    |       |       |       |       |       | 1.053 | 0.64  |                                                                                                                                  |
| ACY3      | aspartoacylase (aminocyclase) 3                                              | NM_080658    | 2.419 | 1.113 | 1.053 | 0.461 |       |       |       | Metabolism.                                                                                                                      |
| RLBP1     | retinaldehyde binding protein 1                                              | NM_000326    |       |       |       |       |       | 1.052 | 0.769 | Vitamin A metabolism. Transport. Sensory perception. Visual perception.                                                          |
| NAG       | neuroblastoma-amplified protein                                              | NM_015909    | 1.052 | 1.008 |       |       |       |       |       |                                                                                                                                  |
| N/A       | N/A                                                                          | AK056288     |       |       |       |       | 1.052 | 0.504 |       |                                                                                                                                  |
| N/A       | N/A                                                                          | AK023691     |       |       |       |       | 1.052 | 1.156 |       | Protein amino acid phosphorylation. Signal transduction. Alcohol metabolism. Lipid metabolism. Metabolism.                       |
| LETMD1    | cervical cancer 1 protooncogene protein p40                                  | NM_015416    | 1.052 | 0.534 |       |       |       |       |       |                                                                                                                                  |
| ITIH1     | inter-alpha (globulin) inhibitor H1                                          | NM_002215    |       |       |       |       |       | 1.052 | 0.269 | Hyaluronan metabolism. Immune cell activation.                                                                                   |
| FAM40A    | * family with sequence similarity 40, member A*                              | NM_033088    | 1.052 | 0.754 |       |       |       |       |       |                                                                                                                                  |
| IGFBP3    | insulin-like growth factor binding protein 3                                 | NM_000598    | 1.051 | 0.534 |       |       |       |       |       | Regulation of cell growth. Positive regulation of myoblast differentiation.                                                      |
| NEU4      | sialidase 4                                                                  | BC012899     | 1.361 | 0.783 |       |       |       | 1.05  | 0.451 | Carbohydrate metabolism.                                                                                                         |
| N/A       | SR rich protein                                                              | AF314185     | 1.05  | 1.037 |       |       |       |       |       |                                                                                                                                  |
| LOC163782 | hypothetical protein LOC163782                                               | NM_181712    |       |       |       |       |       | 1.05  | 0.444 |                                                                                                                                  |
| FLJ45537  | FLJ45537 protein                                                             | NM_001001709 | 1.05  | 0.414 |       |       |       |       |       |                                                                                                                                  |
| DC-UbP    | dendritic cell-derived ubiquitin-like protein                                | NM_152277    |       |       |       |       |       | 1.05  | 0.446 | Protein modification.                                                                                                            |
| USP26     | ubiquitin-specific protease 26                                               | NM_031907    | 1.049 | 1.005 |       |       |       |       |       | Ubiquitin-dependent protein catabolism. Ubiquitin cycle.                                                                         |
| SCUBE2    | CEGP1 protein                                                                | NM_020974    |       |       |       |       | 1.049 | 0.823 |       |                                                                                                                                  |
| SALL1     | sall-like 1                                                                  | NM_002968    | 1.164 | 1.144 | 1.049 | 0.455 |       |       |       | Transcription. Regulation of transcription, DNA-dependent. Morphogenesis.                                                        |
| RNASEL    | ribonuclease L                                                               | NM_021133    | 1.049 | 0.922 |       |       |       |       |       | mRNA processing. Protein amino acid phosphorylation.                                                                             |

|           |                                                                     |              |       |       |       |       |       |       |                                                                                                          |
|-----------|---------------------------------------------------------------------|--------------|-------|-------|-------|-------|-------|-------|----------------------------------------------------------------------------------------------------------|
| N/A       | N/A                                                                 | AK025871     |       |       |       |       | 1.049 | 0.918 |                                                                                                          |
| N/A       | OVN6-2                                                              | AF230200     |       |       | 1.049 | 1.057 |       |       | Regulation of transcription, DNA-dependent. Negative regulation of transcription.                        |
| HZF8      | zinc finger protein                                                 | X78931       | 1.049 | 0.746 |       |       |       |       | Regulation of transcription, DNA-dependent.                                                              |
| ARL5      | ADP-ribosylation factor-like 5 isoform 1                            | NM_012097    |       | 1.049 | 0.565 |       |       |       | Intracellular protein transport. Small GTPase mediated signal transduction.                              |
| ANXA7     | annexin VII isoform 2                                               | NM_004034    | 1.027 | 1.506 |       | 1.049 | 0.984 |       | Negative regulation of coagulation.                                                                      |
| SNX10     | sorting nexin 10                                                    | NM_013322    |       |       |       |       |       | 1.048 | 0.434                                                                                                    |
| PIGA      | phosphatidylinositol N-acetylglucosaminyltransferase subunit A      | NM_002641    |       |       | 1.048 | 1.249 |       |       | Biosynthesis.                                                                                            |
| N/A       | N/A                                                                 | AK126791     |       |       |       |       | 1.048 |       |                                                                                                          |
| LOC253827 | hypothetical protein LOC253827                                      | NM_198080    |       |       |       |       | 1.048 | 0.913 | Protein repair.                                                                                          |
| KIAA0867  | KIAA0867 protein                                                    | AB020674     |       | 1.048 | 0.757 |       |       |       |                                                                                                          |
| HK1       | hexokinase 1 isoform HKI-td                                         | NM_033500    |       |       |       | 1.048 | 0.709 |       | Glycolysis.                                                                                              |
| FLJ37183  | FLJ37183 protein                                                    | NM_198466    |       |       |       |       |       | 1.048 | 0.463                                                                                                    |
| FLJ00017  | FLJ00017 protein                                                    | AK024428     |       |       | 1.048 | 0.573 |       |       |                                                                                                          |
| N/A       | Unknown (protein for MGC:71807)                                     | BC063312     | 1.081 | 1.175 | 1.047 | 0.729 |       |       |                                                                                                          |
| N/A       | Unknown (protein for MGC:47828)                                     | BC039725     |       |       | 1.047 | 0.682 |       |       |                                                                                                          |
| N/A       | N/A                                                                 | AK127460     |       |       |       |       |       | 1.047 | 0.191                                                                                                    |
| N/A       | N/A                                                                 | AK125754     |       |       |       |       |       | 1.047 | 0.529                                                                                                    |
| N/A       | N/A                                                                 | AK096702     | 1.319 | 1.392 | 1.047 | 1.07  |       |       | Regulation of transcription, DNA-dependent.                                                              |
| N/A       | N/A                                                                 | AK075415     |       |       |       |       | 1.047 | 0.39  | Biosynthesis. Coenzyme A biosynthesis.                                                                   |
| F379      | hypothetical protein                                                | AF346307     |       |       | 1.047 | 0.252 |       |       |                                                                                                          |
| CLDN7     | claudin 7                                                           | NM_001307    |       |       |       |       |       | 1.047 | 0.37                                                                                                     |
| CD5L      | CD5 antigen-like (scavenger receptor cysteine rich family)          | NM_005894    |       |       | 1.047 | 1.271 |       |       | Apoptosis. Cellular defense response.                                                                    |
| C1QL1     | * complement component 1, q subcomponent-like 1*                    | NM_006888    |       |       | 1.047 | 0.531 |       |       | Phosphate transport. Locomotory behavior.                                                                |
| ZAP70     | zeta-chain associated protein kinase 70kDa isoform 1                | NM_001079    |       |       | 1.046 | 0.378 |       |       | Protein amino acid phosphorylation. Immune response. Protein kinase cascade.                             |
| N/A       | EPA6                                                                | AY358738     |       |       |       |       |       | 1.046 | 0.426                                                                                                    |
| N/A       | N/A                                                                 | AK074645     |       |       | 1.046 | 1.168 |       |       | Lipid transport. Lipid transport. Lipoprotein metabolism.                                                |
| MGC29671  | hypothetical protein MGC29671                                       | NM_182538    |       |       |       |       |       | 1.046 | 0.377                                                                                                    |
| KCNMB2    | large conductance calcium-activated potassium channel beta2         | AF209747     | 1.124 | 0.836 |       |       | 1.046 | 0.578 | Regulation of action potential. Calcium ion sensing. Potassium ion transport. Smooth muscle contraction. |
| BCAS1     | breast carcinoma amplified sequence 1                               | NM_003657    |       |       | 1.046 | 0.879 |       |       |                                                                                                          |
| SLPI      | secretory leukocyte protease inhibitor precursor                    | NM_003064    |       |       |       |       |       | 1.045 | 0.356                                                                                                    |
| NDST4     | N-deacetylase/N-sulfotransferase (heparan glucosaminyl) 4           | NM_022569    |       |       |       |       |       | 1.045 | 0.407                                                                                                    |
| MBD6      | methyl-CpG binding domain protein 6                                 | NM_052897    |       |       | 1.045 | 1.222 |       |       |                                                                                                          |
| LOC144233 | hypothetical protein LOC144233                                      | NM_181708    |       |       |       |       | 1.045 | 0.68  |                                                                                                          |
| KIAA1866  | KIAA1866 protein                                                    | AB058769     |       |       |       |       |       | 1.045 | 1.026                                                                                                    |
| GPR58     | G protein-coupled receptor 58                                       | NM_014626    |       |       |       |       |       | 1.045 | 0.701                                                                                                    |
| COG2      | component of oligomeric golgi complex 2                             | BC014960     |       |       |       |       |       | 1.045 | 0.73                                                                                                     |
| ASTN2     | astrotactin 2 isoform c                                             | NM_198187    |       |       |       |       |       | 1.045 | 0.486                                                                                                    |
| ZNF179    | zinc finger protein 179                                             | BC053989     |       | 1.044 | 0.598 |       |       |       | Immune response. Protein ubiquitination.                                                                 |
| UBH1      | ubiquitin hydrolyzing enzyme 1                                      | AF022793     |       |       |       |       | 1.044 | 0.348 |                                                                                                          |
| OR1L8     | olfactory receptor, family 1, subfamily L, member 8*                | NM_001004454 |       |       |       |       |       | 1.044 | 0.881                                                                                                    |
| KIAA1145  | KIAA1145 protein                                                    | NM_020698    |       |       | 1.044 | 0.366 |       |       |                                                                                                          |
| K6HF      | cytokeratin type II                                                 | NM_004693    |       |       |       |       |       | 1.044 | 0.429                                                                                                    |
| FLJ00394  | FLJ00394 protein                                                    | AK090473     |       |       |       |       | 1.044 | 1.259 |                                                                                                          |
| CNR1      | central cannabinoid receptor isoform a                              | NM_016083    |       |       |       |       |       | 1.044 | 0.844                                                                                                    |
| TNFRSF11B | osteoprotegerin precursor                                           | NM_002546    | 1.043 | 1.02  |       |       |       |       | Skeletal development. Apoptosis. Signal transduction.                                                    |
| TAF9L     | TBP-associated factor 9L                                            | NM_015975    | 1.043 | 0.98  |       |       |       |       | Transcription initiation. Regulation of transcription, DNA-dependent.                                    |
| SPR       | * sepiapterin reductase (7,8-dihydrobiopterin:NADP+ oxidoreductase) | NM_003124    |       |       |       |       | 1.043 | 0.763 | Tetrahydrobiopterin biosynthesis. Metabolism.                                                            |
| OR2A12    | * olfactory receptor, family 2, subfamily A, member 12*             | NM_001004135 | 1.043 | 1.197 |       |       |       |       |                                                                                                          |
| MGC4734   | hypothetical protein MGC4734                                        | NM_145051    |       |       |       |       |       | 1.043 | 0.465                                                                                                    |
| FLJ00247  | FLJ00247 protein                                                    | AK074174     |       | 1.043 | 0.968 |       |       |       | Protein ubiquitination.                                                                                  |
| VPREB1    | immunoglobulin Iota chain preprotein                                | NM_007128    |       | 1.042 | 0.717 |       |       |       | Development.                                                                                             |
| SGK2      | serum/glucocorticoid induced kinase 2 isoform beta                  | NM_016276    |       | 1.042 | 0.683 |       |       |       | Immune response.                                                                                         |
| PRRX2     | paired related homeobox 2                                           | NM_016307    |       | 1.042 | 0.477 |       |       |       | Protein amino acid phosphorylation. Response to oxidative stress. Protein kinase cascade.                |
| OR7A17    | * olfactory receptor, family 7, subfamily A, member 17*             | NM_030901    |       | 1.042 | 1.277 |       |       |       | Regulation of transcription, DNA-dependent. Development.                                                 |
| N/A       | N/A                                                                 | AK125236     |       |       |       |       |       | 1.042 | 0.446                                                                                                    |
| IFNA6     | * interferon, alpha 6*                                              | NM_021002    | 1.042 | 1.034 |       |       |       |       | Signal transduction. G-protein coupled receptor protein signaling pathway. Perception of smell.          |
|           |                                                                     |              |       |       |       |       |       |       | Regulation of muscle contraction. Muscle development. Regulation of heart contraction rate.              |
|           |                                                                     |              |       |       |       |       |       |       | Defense response. Response to virus.                                                                     |

|                |                                                                      |              |       |       |       |       |       |       |       |       |  |  |                                                                                                                            |
|----------------|----------------------------------------------------------------------|--------------|-------|-------|-------|-------|-------|-------|-------|-------|--|--|----------------------------------------------------------------------------------------------------------------------------|
| CRISP1         | acidic epididymal glycoprotein-like 1 isoform 1 precursor            | NM_001131    | 1.02  | 1.119 | 1.042 | 0.969 |       |       |       |       |  |  | Spermatogenesis. Fusion of sperm to egg plasma membrane.                                                                   |
| CAMK2G         | calcium/calmodulin-dependent protein kinase II gamma isoform         | NM_172171    |       |       | 1.042 | 0.566 |       |       |       |       |  |  | Protein amino acid phosphorylation. Signal transduction. Insulin secretion.                                                |
| N/A            | Unknown                                                              | AF131852     | 1.285 | 0.817 | 1.041 | 0.616 |       |       |       |       |  |  |                                                                                                                            |
| MARLIN1        | multiple coiled-coil GABABR1-binding protein                         | NM_144720    |       |       |       |       |       | 1.041 | 0.909 |       |  |  |                                                                                                                            |
| ITGAX          | integrin alpha X precursor                                           | NM_000887    |       |       |       |       | 1.041 | 0.786 |       |       |  |  | Cell-matrix adhesion. Integrin-mediated signaling pathway. Organogenesis.                                                  |
| IL22RA2        | interleukin 22-binding protein isoform 1                             | NM_052962    |       |       | 1.041 | 0.292 |       |       |       |       |  |  |                                                                                                                            |
| ST7            | suppression of tumorigenicity 7 isoform b                            | NM_021908    |       |       | 1.04  | 1.585 |       |       |       |       |  |  |                                                                                                                            |
| RAB6C          | * RAB6C, member RAS oncogene family*                                 | NM_032144    |       |       |       |       | 1.04  | 0.498 |       |       |  |  | Small GTPase mediated signal transduction. Protein transport. Small GTPase mediated signal transduction. Response to drug. |
| OR9Q1          | * olfactory receptor, family 9, subfamily Q, member 1*               | NM_001005212 |       |       |       |       | 1.04  | 0.972 |       |       |  |  |                                                                                                                            |
| N/A            | N/A                                                                  | AK124538     |       |       |       |       |       |       | 1.04  | 0.437 |  |  |                                                                                                                            |
| GPR82          | G protein-coupled receptor 82                                        | NM_080817    | 1.201 | 1.184 |       |       | 1.04  | 0.973 |       |       |  |  |                                                                                                                            |
| CROCC          | * ciliary rootlet coiled-coil, rootletin*                            | NM_014675    | 3.123 | 0.665 | 1.04  | 0.424 |       |       |       |       |  |  |                                                                                                                            |
| PRDX4          | thioredoxin peroxidase                                               | BC016770     |       |       |       |       | 1.039 | 0.616 |       |       |  |  | I-kappaB phosphorylation.                                                                                                  |
| N/A            | N/A                                                                  | AK126061     |       |       |       |       |       |       | 1.039 | 0.248 |  |  |                                                                                                                            |
| KCNG3          | * potassium voltage-gated channel, subfamily G, member 3 isoform 1*  | NM_133329    |       |       |       |       | 1.039 | 0.747 |       |       |  |  |                                                                                                                            |
| HAAO           | 3-hydroxyanthranilate 3,4-dioxygenase                                | NM_012205    |       |       |       |       |       |       | 1.039 | 0.512 |  |  | Metabolism.                                                                                                                |
| GSTA2          | glutathione S-transferase A2                                         | NM_000846    |       |       |       |       |       |       | 1.039 | 0.503 |  |  | Metabolism.                                                                                                                |
| ENPP6          | ectonucleotide pyrophosphatase/phosphodiesterase 6                   | NM_153343    |       |       |       |       |       |       | 1.039 | 0.319 |  |  | Nucleotide metabolism.                                                                                                     |
| SSX3           | * synovial sarcoma, X breakpoint 3 isoform a*                        | NM_021014    |       |       | 1.038 | 0.365 |       |       |       |       |  |  | Transcription. Regulation of transcription, DNA-dependent.                                                                 |
| SHBG           | sex hormone-binding globulin                                         | NM_001040    |       |       | 1.038 | 0.509 |       |       |       |       |  |  | Hormone transport.                                                                                                         |
| N/A            | N/A                                                                  | M94046       |       |       | 1.038 | 0.89  |       |       |       |       |  |  | Transcription. Regulation of transcription, DNA-dependent.                                                                 |
| MGC71735       | MGC71735 protein                                                     | BC059396     |       |       |       |       |       |       | 1.038 | 0.392 |  |  | Protein amino acid phosphorylation. Signal transduction. Alcohol metabolism. Lipid metabolism.                             |
| LOC51249       | LOC51249 protein                                                     | BC013608     |       |       | 1.038 | 1.446 |       |       |       |       |  |  |                                                                                                                            |
| FLJ32312       | hypothetical protein FLJ32312                                        | NM_144709    |       |       |       |       | 1.038 | 0.746 |       |       |  |  |                                                                                                                            |
| DKFZp547B028   | hypothetical protein cDNA DKFZp547B028 (from clone DKFZp: AL831887)  |              |       |       | 1.038 | 1.173 |       |       |       |       |  |  |                                                                                                                            |
| SCTR           | secretin receptor precursor                                          | NM_002980    |       |       |       |       |       |       | 1.037 | 0.374 |  |  | Signal transduction. G-protein coupled receptor protein signaling pathway. Digestion. Excretion.                           |
| PLXDC1         | plexin domain containing 1 precursor                                 | NM_020405    |       |       | 1.037 | 0.901 |       |       |       |       |  |  | Angiogenesis. Development.                                                                                                 |
| N/A            | Unknown (protein for MGC:35221)                                      | BC029877     |       |       | 1.037 | 0.652 |       |       |       |       |  |  |                                                                                                                            |
| MYBPC1         | myosin binding protein C, slow type isoform 1*                       | NM_002465    |       |       |       |       |       |       | 1.037 | 0.59  |  |  | Striated muscle contraction. Cell adhesion. Muscle development.                                                            |
| KCNMB1         | KCNMB1 protein                                                       | BC025707     |       |       | 1.037 | 0.451 |       |       |       |       |  |  |                                                                                                                            |
| HCFC1R1        | host cell factor C1 regulator 1 (XPO1 dependant) isoform 1           | NM_017885    |       |       | 1.037 | 0.384 |       |       |       |       |  |  |                                                                                                                            |
| FRMD3          | FERM domain containing 3                                             | NM_174938    |       |       |       |       |       |       | 1.037 | 0.498 |  |  | Metabolism.                                                                                                                |
| SLC29A2        | solute carrier family 29 (nucleoside transporters), member 2*        | NM_001532    |       |       |       |       |       |       | 1.036 | 0.613 |  |  | Nucleobase, nucleoside, nucleotide and nucleic acid metabolism. Transport. Cell proliferation. Nucleoside transport.       |
| N/A            | N/A                                                                  | AK127642     |       |       |       |       |       |       | 1.036 | 0.741 |  |  |                                                                                                                            |
| CCL23          | small inducible cytokine A23 isoform CKbeta8-1 precursor             | NM_005064    |       |       |       |       |       |       | 1.036 | 0.341 |  |  | Calcium ion homeostasis. Chemotaxis. Inflammatory response. Signal transduction.                                           |
| CAMK4          | calcium/calmodulin-dependent protein kinase IV                       | NM_001744    |       |       | 1.036 | 0.724 |       |       |       |       |  |  | Protein amino acid phosphorylation. Signal transduction.                                                                   |
| WARP           | von Willebrand factor A domain-related protein isoform 1             | NM_022834    |       |       | 1.035 | 0.917 |       |       |       |       |  |  |                                                                                                                            |
| ROCK2          | * Rho-associated, coiled-coil containing protein kinase 2*           | NM_004850    |       |       | 1.035 | 0.675 |       |       |       |       |  |  | Cytokinesis. Protein amino acid phosphorylation. Muscle contraction.                                                       |
| N/A            | N/A                                                                  | AK126656     |       |       | 1.035 | 1.065 |       |       |       |       |  |  |                                                                                                                            |
| N/A            | N/A                                                                  | AK126320     | 1.072 | 0.702 |       |       |       | 1.035 | 1.071 |       |  |  |                                                                                                                            |
| LOC374676      | similar to golgi autoantigen, golgin subfamily a, 2 Homo sapien      | BC041854     |       |       |       |       |       |       | 1.035 | 0.506 |  |  |                                                                                                                            |
| EIF2AK3        | eukaryotic translation initiation factor 2-alpha kinase 3            | NM_004836    |       |       | 1.035 | 0.365 |       |       |       |       |  |  | Translational initiation. Regulation of translation. Protein amino acid phosphorylation.                                   |
| COL15A1        | alpha 1 type XV collagen precursor                                   | NM_001855    |       |       | 1.035 | 0.406 |       |       |       |       |  |  | Phosphate transport. Cell adhesion. Cell adhesion.                                                                         |
| N/A            | N/A                                                                  | AK096849     |       |       | 1.034 | 0.806 |       |       |       |       |  |  |                                                                                                                            |
| GPR35          | G protein-coupled receptor 35                                        | NM_005301    |       |       |       |       |       |       | 1.034 | 0.439 |  |  | Signal transduction. G-protein coupled receptor protein signaling pathway.                                                 |
| DKFZp686i18166 | hypothetical protein cDNA DKFZp686i18166 (from clone DKFZ: BX641032) |              |       |       | 1.034 | 0.882 |       |       |       |       |  |  |                                                                                                                            |
| CES4           | carboxylesterase 4-like                                              | NM_016280    |       |       |       |       |       |       | 1.034 | 0.365 |  |  | Xenobiotic metabolism. Morphogenesis.                                                                                      |
| SATL1          | SATL1 protein                                                        | BC043215     |       |       |       |       |       |       | 1.033 | 0.678 |  |  |                                                                                                                            |
| N/A            | N/A                                                                  | AK092641     |       |       | 1.033 | 0.977 |       |       |       |       |  |  | Protein amino acid phosphorylation. Signal transduction. Alcohol metabolism. Lipid metabolism.                             |
| N/A            | hepatocellular carcinoma-associated antigen HCA108                   | AF447583     |       |       |       |       |       |       | 1.033 | 0.768 |  |  | Regulation of transcription, DNA-dependent.                                                                                |
| CBLN1          | cerebellin                                                           | NM_004352    |       |       |       |       |       |       | 1.033 | 0.452 |  |  | Synaptic transmission. Neurogenesis.                                                                                       |
| TCAM-1         | testicular cell adhesion molecule 1                                  | AB026156     |       |       | 1.032 | 1.205 |       |       |       |       |  |  |                                                                                                                            |
| SSBP1          | SSBP1 protein                                                        | BC008402     |       |       |       |       |       | 1.032 | 0.451 |       |  |  | DNA replication.                                                                                                           |
| BPIL3          | bactericidal/permeability-increasing protein-like 3                  | NM_174897    |       |       |       |       |       |       | 1.032 | 0.43  |  |  |                                                                                                                            |
| YPEL4          | YPEL4 protein                                                        | BC029228     |       |       |       |       |       |       | 1.031 | 0.949 |  |  |                                                                                                                            |
| RPS26          | ribosomal protein S26                                                | BC002604     |       |       |       |       |       |       | 1.031 | 0.551 |  |  | Protein biosynthesis.                                                                                                      |

|               |                                                                        |              |       |       |       |       |                                                                                                                              |
|---------------|------------------------------------------------------------------------|--------------|-------|-------|-------|-------|------------------------------------------------------------------------------------------------------------------------------|
| NGB           | neuroglobin                                                            | NM_021257    |       |       | 1.031 | 0.307 | Transport. Oxygen transport.                                                                                                 |
| N/A           | N/A                                                                    | AK023679     | 1.031 | 0.632 |       |       |                                                                                                                              |
| MIDORI        | KIAA1330 protein                                                       | NM_020778    | 1.031 | 0.57  |       |       | Protein amino acid phosphorylation. Heart development.                                                                       |
| LOC399851     | hypothetical gene supported by AY129010                                | NM_207427    |       |       | 1.031 | 1.286 |                                                                                                                              |
| LOC388650     | hypothetical LOC388650                                                 | NM_001006605 | 1.031 | 1.252 |       |       |                                                                                                                              |
| HRASLS2       | HRAS-like suppressor 2                                                 | NM_017878    |       |       | 1.031 | 0.973 |                                                                                                                              |
| FLJ23311      | FLJ23311 protein                                                       | NM_024680    | 1.031 | 0.781 |       |       | Regulation of cell cycle. Regulation of transcription, DNA-dependent.                                                        |
| APEH          | N-acetylaminoacyl-peptide hydrolase                                    | NM_001640    | 1.031 | 0.636 |       |       | Proteolysis and peptidolysis.                                                                                                |
| TDRD5         | tudor domain containing 5                                              | NM_173533    |       |       | 1.03  | 0.431 |                                                                                                                              |
| SAMD11        | SAMD11 protein                                                         | BC024295     |       |       | 1.03  | 0.54  |                                                                                                                              |
| PEMT          | phosphatidylethanolamine N-methyltransferase isoform 2                 | NM_007169    |       |       | 1.03  | 0.391 | Lipid metabolism. Phospholipid metabolism. Phosphatidylcholine biosynthesis. Cell proliferation.                             |
| OR10V1        | * olfactory receptor, family 10, subfamily V, member 1*                | NM_001005324 | 1.03  | 0.959 |       |       |                                                                                                                              |
| MOBP          | myelin-associated oligodendrocyte basic protein                        | NM_182935    | 1.03  | 0.479 |       |       | Neurogenesis.                                                                                                                |
| KRTAP17-1     | keratin associated protein 17-1                                        | NM_031964    |       |       | 1.03  | 0.182 |                                                                                                                              |
| KIAA1639      | KIAA1639 protein                                                       | AB046859     |       |       | 1.03  | 0.479 | Protein amino acid phosphorylation.                                                                                          |
| KIAA0264      | N/A                                                                    | D87453       |       |       | 1.03  | 0.677 |                                                                                                                              |
| NFATC1        | * nuclear factor of activated T-cells, cytosolic component 1 isoform 1 | NM_006162    | 1.029 | 0.427 |       |       | Regulation of transcription, DNA-dependent.                                                                                  |
| KIAA1502      | KIAA1502 protein                                                       | AB040935     |       |       | 1.029 | 0.248 |                                                                                                                              |
| DRD2          | dopamine receptor D2 isoform long                                      | NM_000795    |       |       | 1.029 | 0.662 | Signal transduction. Dopamine receptor, adenylate cyclase inhibiting pathway. Synaptic transmission. Neurogenesis.           |
| SLC38A5       | amino acid transport system N2                                         | NM_033518    |       |       | 1.028 | 0.537 | Amino acid transport.                                                                                                        |
| PARP14        | * poly (ADP-ribose) polymerase family, member 14*                      | NM_017554    |       |       | 1.028 | 0.961 | Protein amino acid ADP-ribosylation.                                                                                         |
| NR3C2         | * nuclear receptor subfamily 3, group C, member 2*                     | NM_000901    | 1.028 | 0.494 |       |       | Transcription. Regulation of transcription, DNA-dependent. Sodium ion homeostasis. Signal transduction. Excretion.           |
| N/A           | N/A                                                                    | AK057427     | 1.028 | 0.392 |       |       |                                                                                                                              |
| N/A           | N/A                                                                    | AK027333     |       |       | 1.028 | 0.554 | Protein amino acid dephosphorylation.                                                                                        |
| N/A           | N/A                                                                    | AK000838     | 1.028 | 0.953 |       |       |                                                                                                                              |
| LOC84643      | kinesin protein                                                        | NM_032559    | 1.028 | 0.632 |       |       | Microtubule-based movement.                                                                                                  |
| LOC339457     | hypothetical protein LOC339457                                         | NM_001003808 |       |       | 1.028 | 0.387 |                                                                                                                              |
| KIAA1087      | KIAA1087 protein                                                       | AB029010     |       |       | 1.028 | 0.268 | Sodium ion transport. Calcium ion transport. Cell communication.                                                             |
| KCNS1         | potassium voltage-gated channel delayed-rectifier protein S1           | NM_002251    |       |       | 1.028 | 0.467 | Cation transport. Potassium ion transport.                                                                                   |
| NTN2L         | netrin 2-like                                                          | NM_006181    |       |       | 1.027 | 0.558 | Axon guidance.                                                                                                               |
| N/A           | G protein-coupled receptor PGR23                                       | AY255611     |       |       | 1.027 | 0.482 |                                                                                                                              |
| N/A           | N/A                                                                    | AK097510     | 1.027 | 0.988 |       |       |                                                                                                                              |
| N/A           | PRO2613                                                                | AF119888     | 1.027 | 0.982 |       |       |                                                                                                                              |
| N/A           | PRO1873                                                                | AF119859     |       |       | 1.027 | 0.532 |                                                                                                                              |
| IFRG28        | 28kD interferon responsive protein                                     | NM_022147    | 1.027 | 0.417 |       |       |                                                                                                                              |
| H2AFJ         | * H2A histone family, member J isoform 1*                              | NM_018267    | 1.027 | 0.449 |       |       | Nucleosome assembly. Chromosome organization and biogenesis.                                                                 |
| ELK4          | ELK4 protein isoform b                                                 | NM_021795    | 1.027 | 0.779 |       |       | Regulation of transcription, DNA-dependent.                                                                                  |
| BCGF1         | B-cell growth factor                                                   | M15530       | 1.027 | 0.704 |       |       | Protein amino acid phosphorylation. Signal transduction. Alcohol metabolism. Lipid metabolism.                               |
| ZDHHC11       | zinc finger, DHHC domain containing 11*                                | NM_024786    |       |       | 1.026 | 0.533 |                                                                                                                              |
| UNQ3045       | AAAL3045                                                               | NM_207409    |       |       | 1.026 | 0.585 |                                                                                                                              |
| OKL38         | pregnancy-induced growth inhibitor                                     | NM_013370    |       |       | 1.026 | 0.463 | Cell differentiation. Negative regulation of cell growth.                                                                    |
| N/A           | N/A                                                                    | M13150       |       |       | 1.026 | 0.624 | Signal transduction. G-protein coupled receptor protein signaling pathway. Cell proliferation. Morphogenesis.                |
| N/A           | N/A                                                                    | AK128159     | 1.026 | 1.005 |       |       |                                                                                                                              |
| MUC           | mucin                                                                  | AF015521     | 1.026 | 0.687 |       |       |                                                                                                                              |
| KIAA1246      | KIAA1246 protein                                                       | AB033072     | 1.026 | 0.422 |       |       |                                                                                                                              |
| FLJ45224      | FLJ45224 protein                                                       | NM_207510    |       |       | 1.026 | 0.544 |                                                                                                                              |
| FLJ10569      | hypothetical protein FLJ10569                                          | NM_018142    | 1.026 | 0.617 |       |       |                                                                                                                              |
| COL21A1       | alpha 1 type XXI collagen precursor                                    | NM_030820    |       |       | 1.026 | 0.458 | Phosphate transport. Cell adhesion.                                                                                          |
| TLR5          | toll-like receptor 5                                                   | NM_003268    | 1.025 | 0.605 |       |       | Inflammatory response.                                                                                                       |
| SPAG4L        | sperm associated antigen 4-like                                        | NM_080675    | 1.025 | 0.576 |       |       | Spermatogenesis.                                                                                                             |
| N/A           | N/A                                                                    | AK097772     |       |       | 1.025 | 0.601 |                                                                                                                              |
| KIAA1234      | KIAA1234 protein                                                       | AB033060     | 2.184 | 1.696 |       |       | Apoptosis. Induction of apoptosis by extracellular signals. Regulation of transcription, DNA-dependent. Signal transduction. |
| DKFZp761P0212 | hypothetical protein                                                   | AL162045     |       |       | 1.025 | 0.314 |                                                                                                                              |
| ABCB6         | * ATP-binding cassette, sub-family B, member 6*                        | NM_005689    | 1.025 | 0.606 |       |       | Transport. Iron ion homeostasis.                                                                                             |
| YBX2          | germ cell specific Y-box binding protein                               | NM_015982    | 1.024 | 0.551 |       |       |                                                                                                                              |
| TAGAP         | T-cell activation Rho GTPase-activating protein isoform b              | NM_054114    | 1.024 | 0.516 |       |       |                                                                                                                              |



|               |                                                                 |              |       |       |       |       |       |       |                                                                                                                  |
|---------------|-----------------------------------------------------------------|--------------|-------|-------|-------|-------|-------|-------|------------------------------------------------------------------------------------------------------------------|
| SPACA4        | sperm acrosomal membrane protein 14                             | NM_133498    | 1.024 | 0.222 |       |       |       |       |                                                                                                                  |
| RHBDF1        | rhomboid family 1                                               | NM_022450    |       |       | 1.024 | 0.922 |       |       |                                                                                                                  |
| PTGS1         | prostaglandin-endoperoxide synthase 1 isoform 1 precursor       | NM_000962    | 1.024 | 0.746 |       |       |       |       | Prostaglandin biosynthesis. Lipid metabolism. Fatty acid biosynthesis. Physiological process.                    |
| N/A           | GLPG464                                                         | AY358510     | 1.024 | 0.831 |       |       |       |       |                                                                                                                  |
| MMP2          | matrix metalloproteinase 2 preproprotein                        | NM_004530    | 1.024 | 0.525 |       |       |       |       | Collagen catabolism.                                                                                             |
| FLJ00370      | FLJ00370 protein                                                | AK090449     | 1.024 | 0.545 |       |       |       |       |                                                                                                                  |
| OR7G2         | * olfactory receptor, family 7, subfamily G, member 2*          | NM_001005193 | 1.293 | 1.206 | 1.023 | 1.237 |       |       |                                                                                                                  |
| N/A           | N/A                                                             | AK128261     |       |       |       |       | 1.023 | 0.393 |                                                                                                                  |
| AMBP          | alpha-1-microglobulin/bikunin precursor                         | NM_001633    |       |       |       |       | 1.023 | 0.414 | Transport. Cell adhesion. Pregnancy. Anti-inflammatory response. Heme catabolism.                                |
| TAF2          | TBP-associated factor 2                                         | NM_003184    |       |       | 1.022 | 0.4   |       |       | Transcription initiation from RNA polymerase II promoter.                                                        |
| OR8S1         | olfactory receptor, family 8, subfamily S, member 1*            | NM_001005203 |       |       |       |       | 1.022 | 0.67  |                                                                                                                  |
| N/A           | N/Adynactin light chain.                                        | AK091661     | 1.022 | 0.704 |       |       |       |       | Protein amino acid phosphorylation. Signal transduction. Intracellular signaling cascade.                        |
| N/A           | N/A                                                             | AK091044     |       |       |       |       | 1.022 | 0.317 |                                                                                                                  |
| N/A           | N/A                                                             | AK058065     |       |       | 1.022 | 1.213 |       |       |                                                                                                                  |
| KLK13         | kallikrein 13 precursor                                         | NM_015596    | 1.022 | 0.501 |       |       |       |       | Proteolysis and peptidolysis. Proteolysis and peptidolysis.                                                      |
| IL17D         | interleukin 17D precursor                                       | NM_138284    | 1.022 | 0.49  |       |       |       |       | Inflammatory response.                                                                                           |
| FLJ31265      | hypothetical protein FLJ31265                                   | NM_152395    | 1.022 | 1.185 |       |       |       |       |                                                                                                                  |
| C7orf13       | chromosome 7 open reading frame 13                              | NM_032625    | 1.022 | 0.996 |       |       |       |       | Metal ion transport.                                                                                             |
| C20orf42      | chromosome 20 open reading frame 42                             | NM_017671    | 1.022 | 0.758 |       |       |       |       |                                                                                                                  |
| PDE6B         | phosphodiesterase 6B, cGMP-specific, rod, beta"                 | NM_000283    |       |       |       |       | 1.021 | 0.412 | Signal transduction. Sensory perception. Visual perception. Phototransduction, visible light.                    |
| OSBPL5        | oxysterol-binding protein-like protein 5 isoform a              | NM_020896    | 1.021 | 0.467 |       |       |       |       | Lipid transport. Golgi to plasma membrane transport. Steroid metabolism. Cholesterol metabolism.                 |
| N/A           | N/ACDNA DKFZp451H072 (from clone DKFZp451H072).                 | AL831967     |       |       | 1.021 | 0.769 |       |       |                                                                                                                  |
| N/A           | PRO1722                                                         | AF119851     | 1.021 | 1.02  |       |       |       |       |                                                                                                                  |
| DKFZp547C1010 | hypothetical protein                                            | AL831941     |       |       |       |       | 1.021 | 0.586 |                                                                                                                  |
| SFRP1         | SFRP1 protein                                                   | BC036503     | 1.02  | 0.485 |       |       |       |       | Wnt receptor signaling pathway. Cell differentiation.                                                            |
| MGC4268       | hypothetical protein MGC4268                                    | NM_031445    | 1.02  | 0.436 |       |       |       |       |                                                                                                                  |
| CHURC1        | churcill domain containing 1                                    | NM_145165    | 1.02  | 0.817 |       |       |       |       | Protein amino acid phosphorylation. Signal transduction. Alcohol metabolism. Lipid metabolism.                   |
| SCN7A         | * sodium channel, voltage-gated, type VII, alpha"               | NM_002976    |       |       | 1.019 | 1.072 |       |       | Cation transport. Sodium ion transport. Muscle contraction.                                                      |
| N/A           | Unknown (protein for MGC:17708)                                 | BC008667     |       |       | 1.019 | 0.658 |       |       | Coenzyme A biosynthesis.                                                                                         |
| GNGT2         | guanine nucleotide binding protein-gamma transducing activity   | NM_031498    |       |       |       |       | 1.019 | 0.852 | Signal transduction. G-protein coupled receptor protein signaling pathway. Phototransduction.                    |
| DEFB28        | beta-defensin 28 precursor                                      | AF525930     | 1.019 | 0.812 |       |       |       |       |                                                                                                                  |
| ba9F11.1      | hypothetical LOC255349                                          | NM_001001663 |       |       | 1.019 | 0.379 |       |       |                                                                                                                  |
| TNR-CFTR      | N/A                                                             | S82430       | 1.018 | 0.509 |       |       |       |       |                                                                                                                  |
| MTA1          | metastasis associated protein                                   | NM_004689    | 1.018 | 0.5   |       |       |       |       | Regulation of transcription, DNA-dependent. Signal transduction.                                                 |
| LGALS7        | galectin 7                                                      | BC061588     | 1.018 | 0.661 |       |       |       |       | Apoptosis. Heterophilic cell adhesion.                                                                           |
| KIAA0598      | KIAA0598 protein                                                | AB011170     |       |       | 1.018 | 0.501 |       |       | Regulation of DNA recombination. Hexose biosynthesis. Hexose biosynthesis. Regulation of B-cell differentiation. |
| HS3ST3A1      | heparan sulfate D-glucosaminyl 3-O-sulfotransferase 3A1         | NM_006042    | 1.018 | 0.695 |       |       |       |       |                                                                                                                  |
| FLJ21963      | FLJ21963 protein                                                | NM_024560    |       |       |       |       | 1.018 | 0.819 | Lipid metabolism. Fatty acid metabolism.                                                                         |
| DPAGT1        | UDP-N-acetylglucosamine-dolichyl-phosphate N-acetylglucosa      | NM_001382    |       |       | 1.018 | 1.421 |       |       | Lipid metabolism.                                                                                                |
| DP58          | cytosolic phosphoprotein DP58                                   | NM_001004441 |       |       |       |       | 1.018 | 0.444 |                                                                                                                  |
| C14orf127     | chromosome 14 open reading frame 127                            | BC024919     | 1.018 | 0.527 |       |       |       |       | Protein amino acid phosphorylation. Signal transduction. Alcohol metabolism. Lipid metabolism.                   |
| TSBP          | testis specific basic protein                                   | U60665       | 1.017 | 0.44  |       |       |       |       |                                                                                                                  |
| SMTG2         | * syntrophin, gamma 2"                                          | NM_018968    | 1.017 | 0.783 |       |       |       |       | Central nervous system development.                                                                              |
| FLJ10781      | hypothetical protein FLJ10781                                   | NM_018215    | 1.017 | 0.622 |       |       |       |       |                                                                                                                  |
| N/A           | N/A                                                             | AK124578     | 1.016 | 0.214 |       |       |       |       | Protein ubiquitination.                                                                                          |
| MGC26597      | hypothetical protein MGC26597                                   | NM_152700    | 1.016 | 0.882 |       |       |       |       |                                                                                                                  |
| KRTAP12-2     | keratin associated protein 12-2                                 | NM_181684    | 1.016 | 0.46  |       |       |       |       |                                                                                                                  |
| DKFZp434N062  | hypothetical protein DKFZp434N062                               | NM_199336    | 1.016 | 0.768 |       |       |       |       | Metabolism.                                                                                                      |
| CX62          | connexin 62                                                     | NM_032602    | 1.016 | 0.816 |       |       |       |       |                                                                                                                  |
| WFDC10A       | WAP four-disulfide core domain 10A precursor                    | NM_080753    | 1.015 | 0.72  |       |       |       |       |                                                                                                                  |
| VAV3          | vav 3 oncogene                                                  | NM_006113    |       |       |       |       | 1.015 | 0.645 | Intracellular signaling cascade. Small GTPase mediated signal transduction.                                      |
| SCYL1         | SCY1-like 1                                                     | NM_020680    | 1.124 | 1.004 | 1.015 | 0.823 |       |       | Protein amino acid phosphorylation. Mitotic chromosome condensation.                                             |
| N/A           | Similar to spinster-like protein                                | BC041772     |       |       | 1.015 | 0.677 |       |       | Transport.                                                                                                       |
| N/A           | N/A                                                             | AK023875     |       |       |       |       | 1.015 | 0.507 |                                                                                                                  |
| N/A           | unknown                                                         | AF007157     | 1.042 | 1.208 | 1.015 | 0.998 |       |       |                                                                                                                  |
| LIF           | leukemia inhibitory factor (cholinergic differentiation factor) | NM_002309    |       |       | 1.015 | 0.56  |       |       | Immune response. Cell-cell signaling. Development. Positive regulation of cell proliferation.                    |

|               |                                                                    |              |       |       |       |       |       |                                                                                                       |                                                                          |
|---------------|--------------------------------------------------------------------|--------------|-------|-------|-------|-------|-------|-------------------------------------------------------------------------------------------------------|--------------------------------------------------------------------------|
| FSCN2         | fascin 2                                                           | NM_012418    |       |       |       | 1.015 | 0.525 | Sensory perception. Visual perception. Morphogenesis. Actin filament bundle formation.                |                                                                          |
| FLJ45966      | FLJ45966 protein                                                   | NM_001001700 |       |       |       | 1.015 | 0.486 |                                                                                                       |                                                                          |
| CNN1          | * calponin 1, basic, smooth muscle"                                | NM_001299    | 1.015 | 0.585 |       |       |       | Regulation of smooth muscle contraction.                                                              |                                                                          |
| PRKY          | * protein kinase, Y-linked"                                        | NM_002760    | 1.014 | 0.727 |       |       |       | Protein amino acid phosphorylation.                                                                   |                                                                          |
| GPR172B       | G protein-coupled receptor 172B                                    | NM_017986    | 1.014 | 0.262 |       |       |       |                                                                                                       |                                                                          |
| FLJ23231      | hypothetical protein FLJ23231                                      | NM_025079    | 1.014 | 0.542 |       |       |       |                                                                                                       |                                                                          |
| DKFZp434L142  | hypothetical protein DKFZp434L142                                  | NM_016613    | 1.014 | 1.02  |       |       |       |                                                                                                       |                                                                          |
| DEDD2         | death effector domain-containing DNA binding protein 2             | NM_133328    | 1.014 | 1.318 |       |       |       | Regulation of transcription, DNA-dependent. RNA processing. Intracellular signaling cascade.          |                                                                          |
| NEU2          | sialidase 2                                                        | NM_005383    |       |       |       | 1.013 | 0.461 | Carbohydrate metabolism.                                                                              |                                                                          |
| N/A           | N/A                                                                | AK123170     |       |       |       | 1.013 | 0.478 | Regulation of transcription, DNA-dependent. Cell adhesion.                                            |                                                                          |
| GYLZ-RCC18    | nucleoporin                                                        | AY064415     |       |       |       | 1.013 | 0.757 |                                                                                                       |                                                                          |
| GIPR          | gastric inhibitory polypeptide receptor                            | NM_000164    | 1.013 | 0.56  |       |       |       | Generation of precursor metabolites and energy. G-protein coupled receptor protein signaling pathway. |                                                                          |
| PPP2R2B       | * beta isoform of regulatory subunit B55, protein phosphatase      | NM_004576    | 1.012 | 0.758 |       |       |       | Signal transduction.                                                                                  |                                                                          |
| LOC253724     | LOC253724 protein                                                  | BC064342     | 1.012 | 0.632 |       |       |       |                                                                                                       |                                                                          |
| GPR160        | G protein-coupled receptor 160                                     | NM_014373    | 1.012 | 0.569 |       |       |       | Signal transduction. G-protein coupled receptor protein signaling pathway.                            |                                                                          |
| GLT25D2       | GLT25D2 protein                                                    | BC019709     | 1.012 | 0.757 |       |       |       | Lipopolysaccharide biosynthesis.                                                                      |                                                                          |
| DKFZp434I0428 | hypothetical protein cDNA DKFZp434I0428 (from clone DKFZp          | AL133092     | 1.012 | 0.624 |       |       |       |                                                                                                       |                                                                          |
| Xorf33        | chromosome X open reading frame 33                                 | NM_198450    |       |       | 1.012 | 0.441 |       |                                                                                                       |                                                                          |
| AP1S3         | * adaptor-related protein complex 1, sigma 3 subunit"              | NM_178814    | 1.012 | 0.657 |       |       |       | Protein amino acid phosphorylation. Signal transduction. Alcohol metabolism. Lipid metabolism.        |                                                                          |
| SPINK2        | * serine protease inhibitor, Kazal type 2 (acrosin-trypsin inhibit | BC022514     | 1.011 | 0.364 |       |       |       |                                                                                                       |                                                                          |
| N/A           | voltage-gated potassium channel                                    | L02840       |       |       | 1.011 | 0.744 |       | Cation transport. Potassium ion transport.                                                            |                                                                          |
| N/A           | N/A                                                                | AK022991     |       |       | 1.011 | 0.665 |       | Endocytosis. Signal transduction. Regulation of growth.                                               |                                                                          |
| LOC388962     | similar to RIKEN 1810056O20                                        | NM_212552    | 1.011 | 0.751 |       |       |       |                                                                                                       |                                                                          |
| CST9L         | * cystatin 9-like, precursor"                                      | BC029656     | 1.011 | 0.667 |       |       |       |                                                                                                       |                                                                          |
| ABO           | ABO blood group (transferase A, alpha 1-3-N-acetylgalactosan       | NM_020469    |       |       |       |       | 1.011 | 0.483                                                                                                 | Carbohydrate metabolism. Protein amino acid glycosylation. Biosynthesis. |
| PFC           | * properdin P factor, complement"                                  | NM_002621    |       |       | 1.01  | 0.891 |       | Immune response. Complement activation, alternative pathway. Defense response to bacteria.            |                                                                          |
| N/A           | Unknown (protein for MGC:87657)                                    | BC067891     | 3.165 | 0.63  | 1.01  | 0.965 |       | Protein biosynthesis.                                                                                 |                                                                          |
| DLL4          | delta-like 4 protein precursor                                     | NM_019074    |       |       | 1.01  | 0.759 |       | Signal transduction. Notch signaling pathway. Circulation. Cell differentiation.                      |                                                                          |
| DKFZp434L187  | hypothetical protein cDNA DKFZp434L187 (from clone DKFZp4          | AL117445     | 1.01  | 0.594 |       |       |       |                                                                                                       |                                                                          |
| OR5A1         | * olfactory receptor, family 5, subfamily A, member 1"             | NM_001004728 | 1.009 | 1.025 |       |       |       |                                                                                                       |                                                                          |
| N/A           | N/A                                                                | AK127470     | 1.009 | 0.93  |       |       |       |                                                                                                       |                                                                          |
| MSX1          | msh homeo box homolog 1                                            | NM_002448    | 1.009 | 0.651 |       |       |       | Skeletal development. Regulation of transcription, DNA-dependent.                                     |                                                                          |
| MSLN          | megakaryocyte potentiating factor, precursor"                      | BC003512     |       |       | 1.009 | 0.651 |       | Cell adhesion.                                                                                        |                                                                          |
| OR8G1P        | * olfactory receptor, family 8, subfamily G, member 1"             | NM_001002905 | 1.008 | 0.787 |       |       |       |                                                                                                       |                                                                          |
| N/A           | WGAR9166                                                           | AY358775     | 1.008 | 0.759 |       |       |       |                                                                                                       |                                                                          |
| N/A           | N/A                                                                | AK128839     | 1.008 | 0.652 |       |       |       | Steroid biosynthesis. Metabolism.                                                                     |                                                                          |
| HUMTCHIT      | chitinase                                                          | U58515       | 1.008 | 0.632 |       |       |       | Metabolism.                                                                                           |                                                                          |
| HB92          | cervical cancer homeoprotein 92                                    | AF426412     | 1.008 | 1.051 |       |       |       |                                                                                                       |                                                                          |
| SCNN1A        | amiloride-sensitive epithelial sodium channel alpha subunit        | AY365119     | 1.007 | 0.98  |       |       |       | Ion transport. Sodium ion transport. Excretion. Sensory perception.                                   |                                                                          |
| KIAA0779      | KIAA0779 protein                                                   | NM_015008    | 1.007 | 0.809 |       |       |       |                                                                                                       |                                                                          |
| FLJ46321      | FLJ46321 protein                                                   | NM_001001670 | 1.007 | 0.296 |       |       |       |                                                                                                       |                                                                          |
| CLTCL1        | * clathrin, heavy polypeptide-like 1 isoform b"                    | NM_007098    | 1.007 | 1.124 |       |       |       | Receptor mediated endocytosis. Morphogenesis.                                                         |                                                                          |
| TLR10         | toll-like receptor 10 precursor                                    | NM_030956    | 1.006 | 0.488 |       |       |       | Inflammatory response.                                                                                |                                                                          |
| N/A           | PRO2300                                                            | AF130086     | 1.095 | 0.688 | 1.006 | 0.799 |       | Protein amino acid phosphorylation. Cell cycle. Signal transduction.                                  |                                                                          |
| LOC81558      | C/EBP-induced protein                                              | NM_030802    | 1.006 | 0.318 |       |       |       |                                                                                                       |                                                                          |
| TD-60         | RCC1-like                                                          | NM_018715    | 1.005 | 1.049 |       |       |       |                                                                                                       |                                                                          |
| N/A           | N/A                                                                | AK127907     |       |       | 1.005 | 0.736 |       | Protein amino acid phosphorylation. Signal transduction. Alcohol metabolism. Lipid metabolism.        |                                                                          |
| N/A           | N/A                                                                | AK123974     | 1.005 | 0.702 |       |       |       | Regulation of muscle contraction. Muscle development.                                                 |                                                                          |
| N/A           | PRO1068                                                            | AF116620     | 1.005 | 1.266 |       |       |       |                                                                                                       |                                                                          |
| PCSK5         | proprotein convertase subtilisin/kexin type 5 preproprotein        | NM_006200    | 1.004 | 1.123 |       |       |       | Proteolysis and peptidolysis. Proteolysis and peptidolysis. Cell-cell signaling.                      |                                                                          |
| CHD1L         | chromodomain helicase DNA binding protein 1-like                   | NM_004284    | 1.004 | 0.707 |       |       |       |                                                                                                       |                                                                          |
| SNAI1         | snail 1 homolog                                                    | NM_005985    | 1.003 | 0.567 |       |       |       | Cartilage condensation. Development. Neurogenesis.                                                    |                                                                          |
| RNASE8        | * RNase 8, placental"                                              | NM_138331    | 1.003 | 1.42  |       |       |       | Defense response to bacteria. Innate immune response.                                                 |                                                                          |
| ME4           | cadherin                                                           | D88797       | 1.003 | 0.79  |       |       |       |                                                                                                       |                                                                          |
| COL9A3        | alpha 3 type IX collagen                                           | NM_001853    | 1.003 | 0.465 |       |       |       | Phosphate transport.                                                                                  |                                                                          |
| RBBP7         | retinoblastoma binding protein 7                                   | NM_002893    | 1.002 | 0.54  |       |       |       | Development. Cell proliferation.                                                                      |                                                                          |

|          |                                                             |           |       |       |       |       |                                                      |
|----------|-------------------------------------------------------------|-----------|-------|-------|-------|-------|------------------------------------------------------|
| FLJ13273 | hypothetical protein FLJ13273                               | NM_024751 | 1.002 | 0.484 |       |       |                                                      |
| CXorf43  | chromosome X open reading frame 43                          | NM_144657 |       |       | 1.002 | 0.603 |                                                      |
| ACTR1A   | * ARP1 actin-related protein 1 homolog A, contractin alpha* | NM_005736 | 1.002 | 1.039 |       |       |                                                      |
| XK       | * McLeod syndrome-associated, Kell blood group protein*     | NM_021083 | 1.001 | 1.27  |       |       | Amino acid transport.                                |
| SLC26A7  | * solute carrier family 26, member 7 isoform a*             | NM_052832 | 1.001 | 1     |       |       |                                                      |
| N/A      | VCEW9374                                                    | AY358216  | 1.001 | 0.939 |       |       |                                                      |
| N/A      | N/A                                                         | AK090827  | 1.001 | 0.709 |       |       |                                                      |
| KIAA0255 | N/A                                                         | D87444    |       |       | 1.001 | 0.562 | Transport.                                           |
| SNRPF    | SNRPF protein                                               | BC002505  | 1     | 1.06  |       |       | Nuclear mRNA splicing, via spliceosome.              |
| PXMP2    | PXMP2 protein                                               | BC009836  |       |       | 1     | 0.239 |                                                      |
| MOV10L1  | MOV10-like 1                                                | NM_018995 |       |       | 1     | 0.721 | Development. Germ cell development. Spermatogenesis. |
